# Supplementary material for: Native molecule sequencing by nano-ID reveals synthesis and stability of RNA isoforms
Source: HighWire-hosted journal article supplement (doi:10.1101/gr.257857.119), 2020-09-01
Supplement: Supplemental_Table_S6_JDedit.xlsx [file Supplemental_Table_S6_JDedit.xlsx]

## Sheet: README
Supplemental Table S6: Multi-sheet *.xlsx (Excel) file containing all the corresponding data matrices underlying Figure 3 as well as the estimated RNA stability parameters for both the isoform- and gene level

## Sheet: nanoID.isoform.level.estimates
	chr	strand	start	end	length	cigar	synthesis rate [a.u.]	half-lives [min]	median poly(A)-tail length [nt]	synthesis rate HS [a.u.]	half-lives HS [min]	median poly(A)-tail length HS [nt]
3dd71e53-7205-4921-982c-a0b26d657863.K562.5EU.60.labeled.II;16_chr1:14000	chr1	+	14363	19791	5429	466M140N60M756N10M1D520M2D1M6D288N147M89N2M1D4M2D196M177N138M239N2I133M172N151M206N91M544N2M1D2M1D881M	NA	NA	NA	NA	NA	NA
00fdb333-50c2-4f1e-86ad-23a1a545b131.K562.5EU.60.labeled.II;16_chr1:14000	chr1	+	14363	16717	2355	466M140N984M4D4M655N102M	NA	NA	NA	NA	NA	NA
fdbbdf86-0a1e-45cd-b8f2-4c7714831533.K562.5EU.60.labeled.II;16_chr1:14000	chr1	+	14400	17514	3115	429M140N60M756N10M1D964M89N2M1D4M2D196M177N284M	0.0231049	62.6087	NA	NA	NA	NA
9550979d-db70-4132-ba53-387435f05375.K562.5EU.60.labeled.heat.II;16_chr1:14000	chr1	+	14400	21423	7024	429M140N60M756N10M1D520M2D1M6D288N147M89N2M1D4M2D196M177N510M172N151M206N3154M	0.0231049	62.6087	NA	0.0231049	62.6087	NA
0ab13813-b556-401d-98f8-bbd225c3a854.K562.5EU.0.unlabeled.II;16_chr1:14000	chr1	+	14400	29815	15416	429M140N60M756N10M1D157M4D4M655N144M89N2M1D4M2D196M177N138M239N2I133M172N151M206N109M6352N6D157M4429N493M	0.0231049	62.6087	NA	NA	NA	NA
cbcac954-6251-4dc9-adfa-3b61ac2ac525.K562.5EU.60.labeled.heat.I;16_chr1:14000	chr1	+	14400	18063	3664	429M140N60M756N10M1D157M4D4M655N148M85N2M3D200M177N510M172N151M	0.0231049	62.6087	NA	NA	NA	NA
76edaf1f-549c-4090-ae98-fad4d994e3e1.K562.5EU.0.unlabeled.I;16_chr1:14000	chr1	+	14400	21023	6624	1553M4D4M655N144M89N2M1D4M2D196M177N510M172N151M206N91M544N2M1D2M1D2113M	0.0231049	62.6087	NA	NA	NA	NA
82f6f017-39db-49be-a331-e19aaccac546.K562.5EU.60.labeled.I;16_chr1:14000	chr1	+	14400	18936	4537	429M140N60M756N10M1D231M579N154M89N2M1D4M2D196M177N138M239N2I133M172N151M206N100M543N24M	NA	NA	NA	NA	NA	NA
86903a0e-b4c3-4aa8-b051-5cf11d5ef2ec.K562.5EU.60.labeled.IV;16_chr1:14000	chr1	+	14400	29815	15416	429M140N60M756N10M1D157M4D4M655N144M89N2M1D4M2D196M177N138M239N2I133M172N151M206N95M6366N5D156M2D4640N282M	NA	NA	NA	NA	NA	NA
a81e8b60-18a3-4792-bf3b-989b4dce082f.K562.5EU.0.unlabeled.III;16_chr1:14000	chr1	+	14400	24894	10495	429M140N60M756N10M1D157M4D4M655N144M89N2M1D4M2D196M177N138M239N2I133M172N151M6676N155M	NA	NA	NA	NA	NA	NA
d506331f-785c-41fd-8d4d-fc875081f742.K562.5EU.0.unlabeled.II;16_chr1:14000	chr1	+	14407	16723	2317	2317M	NA	NA	NA	NA	NA	NA
c7f4815e-ed8c-447e-b26a-b3a11484baf7.K562.5EU.60.labeled.IV;16_chr1:134000	chr1	+	134930	135426	497	497M	NA	NA	NA	NA	NA	NA
1c4f2554-f21d-48be-90d5-f304b1de6df2.K562.5EU.60.labeled.IV;0_chr1:138000	chr1	+	138639	139786	1148	1148M	NA	NA	NA	NA	NA	NA
2ebfdcd5-6434-4736-93b4-324aaa02c636.K562.5EU.0.unlabeled.III;16_chr1:184000	chr1	+	184918	199861	14944	2364M89N2M1D4M2D511M241N2I746M6377N4M4I160M4420N23M	0.0202733	110.437	NA	0.0231049	62.6087	NA
a7420f30-47ce-4234-934d-1e786fe4bfc4.K562.5EU.0.unlabeled.III;16_chr1:184000	chr1	+	184918	200308	15391	432M140N60M756N10M1D155M1D2M3D5M655N144M89N2M1D4M2D196M177N138M241N2I133M172N150M206N95M6368N5D158M4420N470M	NA	NA	NA	NA	NA	NA
7f85f6eb-d123-4366-a3e7-20009f639df5.K562.5EU.60.labeled.heat.IV;16_chr1:184000	chr1	+	184918	195419	10502	432M140N60M756N10M1D155M1D2M3D5M655N148M85N2M3D200M177N138M241N2I133M172N150M206N100M6363N7D157M	NA	NA	NA	NA	NA	NA
4499dd47-0f0b-485e-a305-8eb705022f99.K562.5EU.60.labeled.heat.V;16_chr1:184000	chr1	+	184923	195419	10497	427M966N156M1D2M3D5M655N144M89N2M1D4M2D196M472N539M6678N155M	NA	NA	NA	NA	NA	NA
8ac7b256-ec11-48c5-b9c2-3947e792cdbb.K562.5EU.0.unlabeled.III;16_chr1:258000	chr1	+	258515	296300	37786	510M3D1M2521N87M7032N146M27403N4I83M	NA	NA	NA	NA	NA	NA
a2a5a4dd-d4b2-4f8b-92e5-6ae71f52b9bb.K562.5EU.60.labeled.heat.IV;0_chr1:258000	chr1	+	258817	269992	11176	76M6504N4596M	0.0182322	271.042	NA	0.0191788	160.698	67.48
0dc843ae-e228-4204-8705-ab318ef2640f.K562.5EU.60.labeled.VI;16_chr1:262000	chr1	+	262732	265479	2748	2748M	NA	NA	74.76	NA	NA	NA
0714503f-b859-4e76-a37f-571acb4dc2df.K562.5EU.0.unlabeled.II;16_chr1:266000	chr1	+	266117	289364	23248	2085M459N3M3D148M20445N2M4D99M	NA	NA	NA	NA	NA	NA
6274e021-5b27-4667-a8f8-1b7cff90e62c.K562.5EU.60.labeled.II;0_chr1:266000	chr1	+	266834	268654	1821	223M1101N497M	NA	NA	NA	NA	NA	NA
58409910-d077-4bd2-a3f0-3db05295b817.K562.5EU.0.unlabeled.III;16_chr1:629000	chr1	+	629652	630012	361	361M	6.08151	300.447	36.2375	4.00379	261.417	36.615
e95f8396-c2fa-4c49-99c5-b9408b20add5.K562.5EU.0.unlabeled.III;0_chr1:630000	chr1	+	630765	632671	1907	1907M	51.7449	145.255	41.5675	33.0359	125.8	40.195
9ce09621-c624-40c2-b7ee-e7a090c2387a.K562.5EU.1440.labeled.III;0_chr1:632000	chr1	+	633311	633472	162	162M	5.86966	1383.02	54.2575	4.24779	821.656	51.855
14beda2a-e660-41cf-8e26-6670c4242440.K562.5EU.1440.labeled.I;0_chr1:633000	chr1	+	634002	634371	370	370M	9.27851	561.116	40.715	6.30945	411.458	42.65
a0ce1a1a-3e9d-4a58-9d10-b765d1af61f9.K562.5EU.60.labeled.heat.I;0_chr1:634000	chr1	+	634396	634755	360	360M	12.6859	1364.38	58.485	8.0604	1119.16	56.8
f76e75f7-7872-4c84-a96c-f8ebb8aa250a.K562.5EU.0.unlabeled.I;16_chr1:725000	chr1	+	725760	728199	2440	2440M	0.0191788	160.698	NA	NA	NA	NA
d362fe57-7a0b-4ae2-88d9-18e8023d4f20.K562.5EU.60.labeled.heat.V;0_chr1:779000-1	chr1	+	779040	787659	8620	53M7300N1267M	0.0534126	397.408	266.767	0.0172103	1166.35	340.48
d59b1d7a-0f7e-4fd5-9946-d72e67c95f8b.K562.5EU.60.labeled.I;16_chr1:824000	chr1	+	826209	827453	1245	1245M	0.161734	62.6087	NA	0.138629	62.6087	197.16
3b1472ba-c8f9-468e-b239-5f88cb9a0234.K562.5EU.60.labeled.VI;0_NR_047521	chr1	+	827643	854092	26450	133M1227N102M22822N184M1338N644M	NA	NA	NA	NA	NA	NA
37baacd5-4957-4619-a72a-42800dcdb323.K562.5EU.0.unlabeled.II;0_NR_047519	chr1	+	827666	854391	26726	110M1227N102M22822N184M560N96M682N943M	0.0425688	86.2938	80.325	0.0988514	50.8162	101.115
270a91a6-1a87-45a2-998a-6a71ab4e00cd.K562.5EU.60.labeled.I;0_NR_047526	chr1	+	827826	841995	14170	1279M12095N796M	NA	NA	NA	NA	NA	NA
16748bcf-6ad5-4fcf-a40e-7bafb0c85ef1.K562.5EU.60.labeled.IV;0_NR_047519	chr1	+	847651	857183	9533	156M4120N184M560N96M682N3735M	0.115525	62.6087	62.52	0.130777	43.6881	56.76
46112464-0495-42aa-a784-4f2c15d36eda.K562.5EU.60.labeled.heat.V;0_chr1:904000	chr1	+	904796	918109	13314	166M10788N200M1932N228M	NA	NA	NA	NA	NA	NA
21946e26-2327-490c-83c2-33138bb48481.K562.5EU.0.unlabeled.I;16_chr1:916000	chr1	+	916866	925116	8251	5636M502N2M1I4M2D134M131N186M2D4M1187N461M	0.109861	38.8778	51.985	0.0549306	38.8778	NA
75a962a0-99e9-43ee-b64c-31141d58cb74.K562.5EU.60.labeled.VI;0_NM_152486	chr1	+	923936	944579	20644	1013M973N92M4141N182M702N51M4682N125M3143N90M145N138M1731N163M829N116M158N79M70N500M194N125M320N111M99N672M	0.236618	57.8963	38.035	0.277259	20.2817	-1
59539848-3f35-4e4b-b6aa-f2819c8db53b.K562.5EU.60.labeled.IV;0_chr1:939000	chr1	+	939270	944579	5310	191M2675N116M307N2021M	0.207027	44.8818	NA	0.0425688	86.2938	75.17
71e620ef-93c4-46ec-8aa6-4b1284c80f0c.K562.5EU.60.labeled.I;16_chr1:944000-1	chr1	+	944215	959265	15051	586M241N99M370N5M1D137M519N113M115N151M1585N91M1D1M254N3M2D117M3D3M3D1M2D2515N106M6D755N142M1D271N187M574N123M493N99M111N81M1840N95M81N118M678N131M73N176M1655N152M133N52M	0.555261	54.4108	55.5175	0.252933	90.2796	71.935
d483da77-062b-4d2b-9e3f-e8d01784dc09.K562.5EU.60.labeled.heat.I;16_chr1:944000-1	chr1	+	944215	959265	15051	586M256N84M370N5M1D137M519N113M115N151M1585N91M1D1M254N3M2D117M3D3M3D1M2D2515N106M6D755N142M1D271N187M574N123M493N99M111N81M1840N95M81N118M678N131M73N176M1655N152M133N52M	0.943195	50.1936	53.965	0.748031	35.1215	64.505
26963577-d0c9-4115-be9e-ac79846b379b.K562.5EU.60.labeled.heat.III;16_chr1:944000	chr1	+	944215	956004	11790	586M241N99M370N5M1D137M493N139M115N151M1585N91M1D1M254N3M2D117M3D3M3D1M2D2515N106M6D755N142M1D271N187M574N123M493N99M111N81M1840N83M	0.088168	74.4112	NA	0.200662	35.392	NA
8132eb74-e1f3-4cbc-95db-6709a967de00.K562.5EU.0.unlabeled.III;16_chr1:944000	chr1	+	944215	959238	15024	586M241N99M370N5M1D137M519N113M115N151M1585N91M1D1M254N3M2D117M3D3M3D1M2D2515N106M6D755N142M1D271N187M574N123M493N99M111N81M379N2D61M1399N94M81N118M678N131M73N176M1655N152M133N25M	0.414055	44.8818	62.0125	0.147743	89.7093	89.76
NM_198317_198317	chr1	+	960590	965719	5130	211M492N257M4D3M72N122M75N222M307N117M232N214M191N145M83N168M415N89M98N74M168N182M432N757M	0.107799	81.5283	78.4125	0.0693147	62.6087	136.68
35091ad2-690e-4570-992f-307f9ffe7665.K562.5EU.60.labeled.heat.IV;0_NM_198317	chr1	+	960995	965719	4725	555M4D3M72N122M75N646M232N214M114N222M83N168M415N89M98N61M181N182M432N757M	0.22632	67.3235	270.363	0.0785102	135.208	191.175
fa84b645-e061-49d6-96b7-a84fad940251.K562.5EU.60.labeled.IV;0_NM_198317	chr1	+	962307	965719	3413	165M232N214M191N145M83N168M415N89M98N74M168N182M404N785M	0.0185953	214.086	105.485	0.0462098	62.6087	NA
d670f4ec-5ca9-4f2a-ab4f-989457bf3b6c.K562.5EU.60.labeled.VI;0_NM_198317	chr1	+	962705	965719	3015	213M114N222M83N168M415N89M98N424M432N757M	0.0748564	200.421	236.1	0.0383576	160.698	NA
d7d571b9-a221-41c6-9805-a0484a043f70.K562.5EU.60.labeled.heat.V;16_chr1:998000-1	chr1	+	998963	1000142	1180	470M93N88M252N277M	0.0594458	126.875	141.29	0.0583832	143.621	NA
7ffdbb25-f455-4bdd-bdc7-3392dd404a96.K562.5EU.60.labeled.heat.I;16_chr1:998000	chr1	+	998963	1000111	1149	470M93N88M78N96M78N246M	0.176336	74.4112	110.603	0.12334	102.325	84.83
fb9d91e2-5212-4060-825e-07e10b6a02eb.K562.5EU.60.labeled.IV;16_chr1:998000	chr1	+	998963	1000111	1149	470M100N81M78N420M	0.0924196	30.6383	NA	0.0202733	110.437	90.15
1e6d90aa-be89-48a0-9f83-82dab1cc2ba1.K562.5EU.0.unlabeled.II;16_chr1:998000	chr1	+	998963	1000829	1867	470M100N1297M	0.190301	88.9495	137.695	0.203254	67.8478	104.825
7ffdbb25-f455-4bdd-bdc7-3392dd404a96.K562.5EU.60.labeled.heat.I;16_chr1:998000-3	chr1	+	998985	1000142	1158	448M93N88M78N96M78N277M	0.0202733	110.437	NA	0.0231049	62.6087	NA
4cad6204-d483-4099-8ecc-7950e5bc01a3.K562.5EU.60.labeled.heat.I;0_chr1:1000000	chr1	+	1000507	1001063	557	557M	0.0231049	62.6087	NA	0.0202733	110.437	NA
726c9f7c-497e-469b-915d-cff54fcb7561.K562.5EU.60.labeled.heat.I;0_chr1:1009000	chr1	+	1009395	1011466	2072	2072M	NA	NA	NA	NA	NA	NA
NM_005101_005101-1	chr1	+	1013478	1014537	1060	99M407N554M	2.14193	21.3464	38.725	1.61258	23.5914	106.405
NM_198576_198576-1	chr1	+	1020079	1056118	36040	295M1827N262M12814N48M5340N216M292N225M80N225M253N207M1076N219M80N195M90N201M85N149M76N106M721N117M81N165M209N144M87N125M71N106M131N339M84N138M369N128M118N115M88N120M116N354M501N193M176N216M114N230M107N135M195N97M97N165M134N112M415N117M83N193M82N88M1937N225M470N104M272N1295M	0.392139	100.202	136.08	0.392783	62.6087	97.15
c6cb4fdf-2dad-4024-855f-61b96f095b19.K562.5EU.60.labeled.V;0_chr1:1063000	chr1	+	1063079	1066352	3274	123M2628N523M	0.0693147	62.6087	19.5	NA	NA	NA
f3817f85-ded2-4163-85e6-433141466a69.K562.5EU.60.labeled.VI;0_chr1:1064000-2	chr1	+	1064447	1066451	2005	143M1359N503M	0.0924196	30.6383	9.48	0.0231049	62.6087	108.13
d212a006-94f1-494b-9b78-df373a551b05.K562.5EU.60.labeled.II;0_chr1:1065000	chr1	+	1065643	1067217	1575	1575M	0.0924196	62.6087	17.5	0.0425688	86.2938	NA
acfba392-8ea9-46ff-85c0-764e091f6e78.K562.5EU.60.labeled.heat.I;16_chr1:1081000	chr1	+	1081829	1116105	34277	1156M925N3M2D468M97N29M1371N136M1126N65M297N97M1D2754N72M1043N133M375N6M6D112M23956N47M	0.147743	89.7093	77.465	0.103094	100.711	142.08
4642dab9-e65c-48ba-87e5-38f9b5361992.K562.5EU.60.labeled.V;16_chr1:1081000	chr1	+	1081829	1092104	10276	1163M3D2M1461N4M2D9M2I3M1D2M2I1M1I29M1371N136M1126N65M297N97M1D2754N72M1043N93M419N1M6D115M	0.0999183	120.264	26.2675	0.0191788	160.698	NA
2e36e327-043c-4ada-8a89-071ff2125c58.K562.5EU.60.labeled.VI;16_chr1:1081000	chr1	+	1081829	1116105	34277	1156M925N3M2D170M373N9M1I3M6I9M2I1M1I29M1371N136M1126N65M297N97M1D2754N72M1043N93M419N1M6D113M23956N47M	0.0175601	543.791	64.325	NA	NA	NA
1b94a457-c1c7-458f-9174-0bee70df65f7.K562.5EU.60.labeled.heat.III;16_chr1:1216000-3	chr1	+	1216913	1232050	15138	770M768N1M2I3M3D174M131N1D2M3D156M4319N3I109M476N1I1M1I138M4499N480M2945N159M	1.84247	46.2049	91.2025	1.26624	47.4989	109.9
2ec72304-ad5d-4310-8a71-6f0d2675e858.K562.5EU.0.unlabeled.III;16_chr1:1216000-1	chr1	+	1216913	1232050	15138	894M1D4M652N168M131N1D2M3D156M4319N3I109M476N1I1M1I138M4499N480M2945N159M	0.577623	62.6087	66.57	0.30543	46.8654	109.48
d3c0e5dd-9075-4d8f-bbd2-50bbf75f6b9b.K562.5EU.60.labeled.VI;16_chr1:1216000-2	chr1	+	1216920	1232000	15081	763M768N1M2I3M3D174M131N1D2M3D153M1D2M4320N108M476N1I1M1I138M4499N480M2945N109M	0.471598	50.1936	35.68	0.161734	62.6087	NA
ffbdfbca-afb4-49ff-be1d-c352f36b6ade.K562.5EU.60.labeled.IV;0_chr1:1232000	chr1	+	1232281	1233688	1408	1408M	0.411424	80.027	111.8	0.266169	54.0377	47.575
ab217715-8775-4741-a82d-757be160e8b7.K562.5EU.60.labeled.heat.IV;16_chr1:1253000-2	chr1	+	1253910	1273828	19919	1577M557N82M866N137M70N1M7D110M2I2M10518N12M2I6M1I6M3I134M5673N161M	0.438993	62.6087	63.615	0.150345	82.888	83.44
d27d92c5-ef23-4101-b3c1-fbf3dc64e6eb.K562.5EU.60.labeled.VI;16_chr1:1253000-1	chr1	+	1253910	1256639	2730	1577M557N596M	0.0383576	160.698	NA	0.0549306	38.8778	31.52
11dee21a-fade-431b-b3e5-b450c5381e1f.K562.5EU.0.unlabeled.I;16_chr1:1253000-1	chr1	+	1253910	1273828	19919	1577M557N82M866N137M70N1M7D101M4958N127M3D3M1I4M1D1M1D3M2I5M5432N9M1I6M3I134M5673N161M	0.274653	38.8778	NA	0.161734	62.6087	43.86
abb6abf2-e201-4b94-b226-b32f03891c10.K562.5EU.60.labeled.IV;16_chr1:1253000-2	chr1	+	1253917	1273828	19912	1570M557N82M866N137M70N1M7D100M6030N3D2M2D39M10274N1D3M4D164M	0.369678	30.6383	19.4075	0.175094	49.1253	127.44
69749cca-b6f5-4457-acce-fd4f61a93a7b.K562.5EU.0.unlabeled.I;16_chr1:1254000	chr1	+	1254901	1273828	18928	586M557N77M871N137M70N1M7D110M2I2M10518N12M2I6M1I6M3I134M5673N161M	NA	NA	NA	0.0462098	62.6087	NA
91cbfe52-e23c-4a82-b5a5-68467f94df1c.K562.5EU.60.labeled.IV;16_chr1:1254000	chr1	+	1254901	1273828	18928	586M557N82M866N137M70N1M7D110M3I2M10393N1M1I1M2I11M3I7M3I263M5673N161M	0.32059	84.7033	98.645	0.264504	74.4112	113.58
8d38bec6-4c66-4b06-a4ce-fbc901243413.K562.5EU.60.labeled.heat.II;0_chr1:1274000	chr1	+	1274090	1280493	6404	392M4586N163M100N1163M	NA	NA	NA	NA	NA	NA
15f44131-e058-4635-8d46-c7102874e546.K562.5EU.0.unlabeled.I;16_chr1:1292000	chr1	+	1292376	1307873	15498	1333M116N2I109M156N109M202N229M1D88N97M1D4M1I2M630N105M1D1M1D5M180N1I192M76N97M2I3M103N59M141N2M3D212M1188N601M2D1M143N110M1151N78M67N94M91N2I43M306N183M1295N60M875N55M2D3M184N118M804N62M3625N99M	0.0191788	160.698	NA	0.0405465	110.437	241
517c83cf-851f-4ab6-8353-d83fcaa7adf3.K562.5EU.0.unlabeled.I;16_chr1:1292000	chr1	+	1292413	1303311	10899	1296M116N2I109M156N109M202N229M1D88N97M1D4M1I2M630N105M1D1M1D5M180N1I192M76N97M2I3M103N59M141N2M3D212M1188N109M96N89M256N51M2D1M143N110M1151N78M67N94M91N2I43M306N183M1295N60M875N55M2D3M184N146M	0.0924196	30.6383	NA	NA	NA	NA
da93453f-c2d5-41a7-9c42-4f1b026334b0.K562.5EU.0.unlabeled.I;16_chr1:1292000	chr1	+	1292871	1307919	15049	838M116N2I109M156N109M202N228M1D1M817N110M1D1M1D5M180N1I192M76N97M2I3M103N59M141N2M3D212M1188N111M79N104M256N51M2D1M143N110M1151N78M67N94M91N2I43M306N183M1295N60M875N55M2D3M184N118M804N62M3625N145M	0.0231049	62.6087	NA	NA	NA	NA
491baa93-09c0-412e-b640-8b7997a36691.K562.5EU.60.labeled.IV;16_chr1:1292000	chr1	+	1292874	1307873	15000	835M116N2I109M156N109M202N415M1D4M1I2M630N105M1D1M1D5M180N1I192M76N97M2I3M103N59M141N2M3D212M1188N109M96N89M256N51M2D1M143N1339M67N94M91N2I43M306N183M1295N60M875N55M2D3M184N118M804N62M3625N99M	NA	NA	NA	NA	NA	NA
928ac655-4e63-49ea-bed8-8c9f470d3bde.K562.5EU.60.labeled.heat.I;0_NM_153339-1	chr1	+	1308569	1311676	3108	152M194N58M113N188M180N150M77N171M782N55M203N180M258N347M	0.164792	38.8778	35.5	0.405557	22.5668	NA
NM_153339_153339-3	chr1	+	1308608	1311676	3069	113M194N58M113N188M180N150M77N171M782N55M220N163M258N347M	1.31209	28.5539	119.442	0.895589	26.8044	99.55
7765b56c-0391-4707-b53f-d7634114ab32.K562.5EU.60.labeled.V;0_NM_153339	chr1	+	1308629	1311676	3048	92M194N58M113N188M180N150M102N146M782N55M220N163M258N347M	NA	NA	NA	0.0191788	160.698	98.57
83147cbe-e879-42df-ba1c-8183597c48e3.K562.5EU.60.labeled.IV;0_NM_153339-2	chr1	+	1308730	1311676	2947	243M113N188M180N150M77N171M782N55M220N163M258N347M	0.42275	31.8415	150.87	0.197703	50.8162	145.18
028de98e-f891-4eca-bed9-9e4f00aecaf4.K562.5EU.60.labeled.heat.IV;0_chr1:1311000	chr1	+	1311601	1311926	326	326M	0.175094	49.1253	127.9	NA	NA	NA
8aa04ec5-89a8-47a7-b3ea-343877e1a717.K562.5EU.60.labeled.heat.IV;16_chr1:1311000	chr1	+	1311609	1324625	13017	318M2D5M91N125M78N140M2D1M69N60M84N1M7D108M86N164M85N88M384N84M139N195M379N59M457N1M1D141M1I2M2D2M3D3M2I3M1I6M523N1M1I11M1I102M3677N138M2D1020N72M466N97M3487N46M	0.38428	33.2165	110.405	0.283338	45.4235	108.12
c3ec1b53-277a-4903-9549-a437b65688e0.K562.5EU.60.labeled.IV;16_chr1:1311000-1	chr1	+	1311609	1324641	13033	318M2D5M91N125M78N140M2D1M69N60M84N1M7D108M86N164M85N88M384N84M139N195M379N59M457N1M1D141M1I2M2D2M3D3M2I3M1I6M523N1M1I11M1I102M3677N223M927N1M4D77M466N97M3487N62M	1.01942	49.9505	88.055	1.24139	30.2143	90.7
6595fe1b-1e60-45eb-9872-b375b33396d9.K562.5EU.60.labeled.IV;16_chr1:1311000	chr1	+	1311609	1314885	3277	318M2D5M91N125M78N722M85N88M384N84M139N633M457N1M1D64M	0.167524	55.8758	40.94	0.107799	81.5283	101.95
57239433-054b-4a47-9377-61b6c5955d0b.K562.5EU.60.labeled.IV;16_chr1:1311000	chr1	+	1311609	1324625	13017	318M2D5M91N125M78N142M1D223N106M86N164M85N88M384N84M139N1710M1D1M80N99M3677N223M927N1M4D77M466N97M3487N46M	0.240245	41.5581	103.065	0.164792	38.8778	95.34
015e4989-02e4-4d9b-9109-c0ed35a22af3.K562.5EU.60.labeled.heat.I;16_chr1:1316000-1	chr1	+	1316613	1324641	8029	2908M927N1M4D77M466N97M3487N62M	0.0763576	46.8654	45.56	0.0851376	86.2938	205.515
NM_001029885_001029885	chr1	+	1324821	1328895	4075	282M1733N197M208N1655M	0.152715	46.8654	32.6575	0.164792	38.8778	39.81
2ea38855-735b-4316-bd66-c3998735f0a8.K562.5EU.60.labeled.heat.I;16_chr1:1335000	chr1	+	1335286	1349401	14116	1219M1462N5M2I3M1D208M85N167M85N133M633N154M3D139N66M80N6D83M2D1M223N134M69N69M93N94M1163N141M1D246N103M1D1M205N123M206N2I67M1D6136N505M	0.208226	179.725	108.06	0.162186	110.437	58.47
49fc0d58-16f0-45ce-a136-38f5d5964d93.K562.5EU.60.labeled.VI;16_chr1:1335000-2	chr1	+	1335286	1349376	14091	1219M1462N5M2I3M1D208M85N167M85N134M1I1M1I1M710N74M3D139N66M80N6D83M2D1M223N134M69N69M93N94M1163N141M1D246N103M1D1M205N123M206N2I67M1D6136N480M	0.201223	115.338	118.06	0.132232	183.169	178.44
bd62deae-a3ad-44b2-acba-7582bcbf22c2.K562.5EU.60.labeled.heat.I;16_chr1:1335000	chr1	+	1335325	1349376	14052	1193M4D1457N205M85N167M85N134M1I1M1I1M710N282M80N6D83M2D1M223N134M69N69M93N94M1163N141M1D246N103M1D1M205N123M206N2I67M1D6136N480M	0.0376972	186.972	-0.25	0.0851376	86.2938	28.955
a1c4dae7-0a5d-4089-ae7a-84ce5c05ded8.K562.5EU.60.labeled.heat.III;16_chr1:1335000	chr1	+	1335325	1342402	7078	2859M85N167M85N133M633N154M3D139N235M2D1M223N134M69N69M93N94M1163N141M1D246N103M1D1M205N39M	NA	NA	NA	0.0549306	38.8778	NA
4fdf7947-782e-43a9-a3af-0f81d74d9b76.K562.5EU.60.labeled.IV;16_chr1:1335000	chr1	+	1335325	1349186	13862	1193M4D1457N205M85N167M85N134M1I1M1I1M710N74M3D139N235M2D1M223N134M69N69M93N94M1163N141M1D246N103M1D1M205N123M206N2I67M1D6136N290M	0.0462098	62.6087	15.925	0.0763576	46.8654	NA
6a7f1b17-6ec5-4d9e-a89c-899cc2a47fa6.K562.5EU.1440.labeled.I;0_chr1:1352000	chr1	+	1352543	1357880	5338	3198M1473N667M	0.176336	74.4112	236.333	0.0553705	232.654	152.385
e0d3fa5c-e852-497b-a33c-1cd56b25c5d9.K562.5EU.60.labeled.heat.IV;16_chr1:1352000	chr1	+	1352693	1355218	2526	936M218N84M103N2I72M86N318M172N537M	0.0392551	135.208	48.24	0.081093	110.437	78.72
b15b0936-e262-47f6-9d6b-ec5907ad957e.K562.5EU.60.labeled.IV;16_chr1:1352000	chr1	+	1352693	1358532	5840	936M218N84M103N2I72M86N35M1D120N162M172N471M91N102M104N306M2686N5M5I4M1I4M1I78M	0.157152	69.3462	38.87	0.138629	62.6087	122.515
3e22e86a-0b7c-45e1-8983-dd83fc92f4fd.K562.5EU.60.labeled.heat.V;16_chr1:1352000	chr1	+	1352708	1358554	5847	1223M103N2I72M86N35M1D120N162M172N471M91N102M104N303M1I3M2707N3I92M	NA	NA	NA	0.0549306	38.8778	NA
f38a0b8c-ba2b-4886-a0f6-b8d6cd82c4d4.K562.5EU.60.labeled.heat.II;16_chr1:1373000-2	chr1	+	1373710	1375159	1450	193M97N445M259N87M284N85M	0.323469	62.6087	52.54	0.375067	59.6636	69.4
65735e5d-19dd-44a8-83c6-c3de17a7893b.K562.5EU.60.labeled.V;16_chr1:1373000	chr1	+	1373710	1375189	1480	193M97N445M708N37M	0.530402	33.4293	25.58	0.40996	29.3284	-1
f38a0b8c-ba2b-4886-a0f6-b8d6cd82c4d4.K562.5EU.60.labeled.heat.II;16_chr1:1373000-1	chr1	+	1373741	1375189	1449	162M97N445M259N87M284N115M	0.180197	68.5032	83.25	0.130577	78.3609	114.17
e8ca8ef1-39b2-49cf-b772-1360eb79ed66.K562.5EU.60.labeled.II;16_chr1:1373000-1	chr1	+	1373741	1375154	1414	162M97N445M259N88M2D3M3D2M201N152M	0.165728	98.2946	76.79	0.229073	46.8654	101.17
d8e1d892-6a65-4b10-9d5a-fe7ae9f45d8c.K562.5EU.60.labeled.V;16_chr1:1373000-1	chr1	+	1373741	1375284	1544	162M97N445M259N87M363N131M	1.05802	42.4914	66.0925	0.802649	35.392	97.23
d8e1d892-6a65-4b10-9d5a-fe7ae9f45d8c.K562.5EU.60.labeled.V;16_chr1:1373000	chr1	+	1373741	1375189	1449	162M97N445M259N87M363N36M	0.410714	54.2901	106.457	0.474764	37.4488	96.495
cca33d29-fb72-4ba7-8bf0-add54b8edf09.K562.5EU.60.labeled.VI;16_chr1:1373000	chr1	+	1373741	1375159	1419	162M97N792M2D3M3D2M201N157M	0.519356	58.3248	74.7625	0.157152	69.3462	65.45
e8ca8ef1-39b2-49cf-b772-1360eb79ed66.K562.5EU.60.labeled.II;16_chr1:1373000	chr1	+	1373741	1375159	1419	162M97N445M259N88M2D3M3D2M201N157M	0.496294	58.1207	62.6775	0.699881	40.7358	75.59
1958743b-e2fb-4139-bdc4-d0846576754d.K562.5EU.60.labeled.II;16_chr1:1373000	chr1	+	1373741	1375159	1419	704M259N88M2D3M3D2M201N157M	0.381788	46.8654	66.255	0.240245	41.5581	61.635
fe91e765-f6af-45b5-9162-d6b38ebf565c.K562.5EU.60.labeled.VI;16_chr1:1373000	chr1	+	1373741	1375189	1449	162M97N591M114N86M363N36M	0.627446	27.0104	36.7375	0.346736	34.8054	41.27
c38a33d3-c5b9-45cd-9711-fdd5bdb4044c.K562.5EU.60.labeled.VI;16_chr1:1373000	chr1	+	1373741	1375494	1754	162M97N445M259N87M384N320M	0.317706	28.9322	36.2525	0.184839	30.6383	46.48
d8e1d892-6a65-4b10-9d5a-fe7ae9f45d8c.K562.5EU.60.labeled.V;16_chr1:1373000-3	chr1	+	1373771	1375308	1538	132M97N445M259N87M363N155M	0.227023	21.6944	44.805	0.0231049	62.6087	NA
641118fa-1df1-47ef-96f1-6b1cc92f4926.K562.5EU.60.labeled.heat.III;16_chr1:1385000	chr1	+	1385709	1399324	13616	1873M194N95M1D83N115M2164N135M87N110M202N2021M600N6M3I66M1933N120M2718N111M254N77M3D344N304M	0.207944	62.6087	87.825	0.22225	72.0459	335.34
02383f11-9f2c-4bd9-b08e-87a0f612663d.K562.5EU.60.labeled.heat.III;16_chr1:1385000	chr1	+	1385709	1399324	13616	1873M194N95M1D83N115M2164N135M87N110M202N91M1816N3M3I125M592N66M1933N120M2718N111M254N77M3D344N304M	0.254154	62.6087	270.918	0.161734	62.6087	186.9
c58f191a-21bd-4882-b688-3dab92550361.K562.5EU.60.labeled.IV;16_chr1:1385000	chr1	+	1386495	1399324	12830	1087M194N95M1D83N115M2164N135M87N110M202N91M2527N2M1D4M2D66M1933N120M2718N111M254N77M3D344N304M	0.107799	81.5283	178.07	0.0652885	78.3609	239.5
2ba17a0b-17db-4dac-a597-b9b10c0093ab.K562.5EU.60.labeled.IV;16_chr1:1385000-1	chr1	+	1386495	1399298	12804	1087M194N95M1D83N115M2164N135M87N110M202N2035M592N66M1933N120M2718N111M254N77M3D344N278M	0.0785102	135.208	56.6125	0.150345	82.888	193.265
37417f85-4fa5-4c68-b228-6e4a55bac240.K562.5EU.60.labeled.heat.I;16_chr1:1386000	chr1	+	1386495	1389007	2513	1087M194N95M1D83N113M1I2M561N377M	0.0851376	86.2938	-0.5	0.184839	30.6383	NA
6787bf47-5c50-4489-ae21-6012dbfa8403.K562.5EU.60.labeled.heat.I;16_chr1:1386000	chr1	+	1386711	1399324	12614	871M194N95M1D83N2611M202N2693M1933N120M2718N442M3D344N304M	0.184116	105.022	207.5	0.160693	116.567	258.79
2ba17a0b-17db-4dac-a597-b9b10c0093ab.K562.5EU.60.labeled.IV;16_chr1:1385000	chr1	+	1386711	1399324	12614	871M194N95M1D83N115M2164N135M87N110M202N2035M592N66M1933N120M2718N111M254N77M3D344N304M	0.0553705	232.654	31.3875	NA	NA	NA
b05ea2db-d777-43b3-8c41-73af5850d43e.K562.5EU.60.labeled.IV;16_chr1:1386000	chr1	+	1386711	1392583	5873	871M194N95M1D83N113M1I2M561N114M7D3M1D1478N135M87N110M202N1816M	0.0549306	38.8778	111.805	NA	NA	NA
NR_015434_015434	chr1	+	1399576	1402040	2465	114M468N146M301N1436M	0.177188	132.422	98.535	0.22632	67.3235	111.76
ace3f0f2-a392-4be5-bad6-3ffe11d334a1.K562.5EU.60.labeled.IV;16_chr1:1401000	chr1	+	1401927	1407291	5365	330M3552N84M339N785M103N3M8D161M	0.167524	55.8758	26.855	0.18546	42.3201	74.72
5c250aac-ce71-43b4-9840-be501a334793.K562.5EU.60.labeled.I;16_chr1:1401000	chr1	+	1401927	1407291	5365	330M3552N78M1022N108M103N3M8D161M	0.970472	46.4484	74.99	0.425688	41.8917	83.41
95725150-1bc1-4011-8f1f-32367a45efba.K562.5EU.60.labeled.heat.III;16_chr1:1401000	chr1	+	1401927	1407291	5365	330M3552N1208M103N3M8D161M	0.195866	78.3609	25.45	0.088168	74.4112	127.13
82ab1a0b-f315-451e-a3b8-8f42cb5e935b.K562.5EU.0.unlabeled.I;16_chr1:1401000	chr1	+	1401927	1406778	4852	328M204N2M1D136M3207N88M339N547M	NA	NA	NA	0.0231049	62.6087	210.63
842ef540-9d0a-4408-8d36-1bce213cbe09.K562.5EU.60.labeled.heat.IV;16_chr1:1401000-1	chr1	+	1401927	1407291	5365	671M3207N82M1022N108M103N3M8D161M	0.212844	86.2938	99.665	0.425688	41.8917	51.05
bf7ff653-cb9c-44b3-a0d8-92aa871e20a1.K562.5EU.60.labeled.IV;16_chr1:1401000	chr1	+	1401927	1407291	5365	499M3383N78M1022N108M103N3M8D161M	0.539726	51.8909	79.9375	0.45661	55.1665	130.695
5020a245-5e9b-42de-b194-7b0729a2b116.K562.5EU.60.labeled.IV;16_chr1:1401000-1	chr1	+	1401927	1407231	5305	330M3552N78M1244N101M	NA	NA	NA	NA	NA	NA
ad23faad-e32f-4784-a632-9a3f8d028e48.K562.5EU.60.labeled.IV;16_chr1:1401000	chr1	+	1401927	1407291	5365	330M3552N84M339N115M4D2M558N106M103N3M8D161M	1.36319	55.994	86.76	0.894117	46.4126	56.5
2e5ed352-adfc-4956-bd02-82d85821f36c.K562.5EU.60.labeled.III;16_chr1:1401000	chr1	+	1401927	1407291	5365	328M204N2M1D136M3207N82M1022N108M103N3M8D161M	0.462098	62.6087	71.835	0.425688	41.8917	94.055
c611e434-5e46-476b-8c2e-60c706821fe2.K562.5EU.60.labeled.V;16_chr1:1401000-2	chr1	+	1401927	1407291	5365	322M3558N80M1022N108M103N3M8D161M	NA	NA	NA	NA	NA	NA
3c2a65f8-84b7-46e4-8cb8-ee8f4187cea8.K562.5EU.60.labeled.I;16_chr1:1401000	chr1	+	1401927	1407291	5365	355M2D1M3527N75M1022N108M103N3M8D161M	NA	NA	NA	NA	NA	-1
5c250aac-ce71-43b4-9840-be501a334793.K562.5EU.60.labeled.I;16_chr1:1401000-1	chr1	+	1401927	1407231	5305	330M3552N78M1022N108M103N3M8D101M	0.220448	52.1296	63.48	0.13412	26.3128	NA
136aa013-9a58-4ad2-ab66-eb18f362dc09.K562.5EU.1440.labeled.I;16_chr1:1401000	chr1	+	1401927	1407291	5365	330M3546N84M1022N108M103N3M8D161M	0.0405465	110.437	96.815	0.0549306	38.8778	NA
e8e0bc5d-8388-4211-9377-167035eaa6dc.K562.5EU.1440.labeled.II;0_chr1:1407000	chr1	+	1407391	1410673	3283	3283M	0.316201	42.8907	63.14	0.12334	102.325	307.53
383cfbc5-5f7b-4c5e-b21b-40ba1e3001bd.K562.5EU.60.labeled.heat.I;16_chr1:1471000	chr1	+	1471264	1471568	305	305M	0.0924196	30.6383	72.9525	NA	NA	NA
a54e7fa4-1067-489b-8aff-91c45e46b561.K562.5EU.60.labeled.IV;0_NM_031921	chr1	+	1471798	1496200	24403	292M5184N77M400N995M303N60M1758N70M1201N166M241N70M2401N156M610N57M271N126M308N125M1194N52M1289N71M982N168M138N109M4813N716M	0.287189	103.48	156.145	0.173072	80.3397	72.96
NM_031921_031921-1	chr1	+	1471798	1496200	24403	292M5184N77M1293N102M303N60M1758N70M1201N166M241N70M2401N156M610N57M271N126M308N125M1194N52M1289N71M982N168M138N109M4813N716M	0.303638	79.4913	148.148	0.203254	67.8478	-1
e02078fc-7fda-4eb8-96bc-63797709832a.K562.5EU.60.labeled.IV;0_chr1:1505000	chr1	+	1505129	1509465	4337	63M4013N261M	0.0924196	30.6383	44.32	NA	NA	NA
20ddf0cb-6a47-4e2d-bcd8-bf7f4408d78f.K562.5EU.60.labeled.heat.V;16_chr1:1511000	chr1	+	1511300	1511964	665	665M	0.144551	54.7527	96.87	0.0202733	110.437	NA
9c6e82e9-5aea-4d28-80f1-f7db16d7aff7.K562.5EU.60.labeled.II;0_NM_018188	chr1	+	1512188	1534683	22496	286M3538N77M1222N102M303N60M1145N70M1150N166M241N70M2126N156M611N57M271N126M308N1019M1169N2871M4594N758M	0.917461	58.9839	76.6575	0.844088	39.6584	66.09
NM_001170535_018188-1	chr1	+	1512188	1534683	22496	286M3538N77M1222N102M303N60M1145N70M1150N166M241N70M2126N156M611N57M271N126M308N125M842N52M1169N71M1163N168M1360N109M4594N758M	0.825168	58.5696	46.955	0.590157	41.0724	58.26
9539b991-aa00-4562-9380-c0d63fdcc637.K562.5EU.0.unlabeled.II;0_NM_018188	chr1	+	1516016	1534662	18647	73M1222N102M303N60M1145N70M1150N166M241N70M2126N156M611N57M271N126M308N1019M1169N71M1163N168M1360N109M4594N737M	0.0425688	86.2938	NA	0.13412	26.3128	NA
88e5caa6-69fb-46a2-9a05-384efa47dc9b.K562.5EU.60.labeled.IV;16_chr1:1539000	chr1	+	1539070	1540111	1042	1042M	0.0231049	62.6087	NA	NA	NA	NA
b881890e-8fba-48df-a40e-51215952eb0d.K562.5EU.60.labeled.heat.II;16_chr1:1541000	chr1	+	1541676	1574599	32924	492M1701N119M875N134M19770N150M9558N125M	0.620347	36.6657	69.3	0.548585	56.4616	43
41274409-0e0b-4756-903c-01d8e98b336d.K562.5EU.60.labeled.heat.I;16_chr1:1541000	chr1	+	1541676	1574849	33174	492M1701N119M875N134M19770N155M9561N367M	2.33381	51.6873	91.015	2.24786	37.979	109.63
1a1eaece-d417-4e0c-acbb-bdfd18384ff6.K562.5EU.1440.labeled.II;16_chr1:1541000	chr1	+	1541676	1574599	32924	492M2695N134M19770N155M9561N117M	0.190535	56.7178	-0.5	0.0988514	50.8162	29.76
43e44cc4-7c67-45e0-ad9c-edbe449151e2.K562.5EU.0.unlabeled.III;16_chr1:1541000	chr1	+	1541676	1574849	33174	2312M875N134M19770N155M9561N367M	2.19121	54.8391	104.882	1.65724	52.9015	116.14
df6fa94e-591a-4669-bcc8-4a4f901148a9.K562.5EU.1440.labeled.II;16_chr1:1560000	chr1	+	1560857	1561496	640	640M	NA	NA	NA	NA	NA	NA
53dbcb6e-c6cb-47d7-9f25-22b83937edf8.K562.5EU.60.labeled.IV;16_chr1:1561000-1	chr1	+	1562352	1574870	12519	2570M9561N388M	0.325992	107.387	142.855	0.289101	54.7527	173.7
fd38ecaf-acd3-412a-8631-3b0473501f25.K562.5EU.60.labeled.IV;0_chr1:1574000	chr1	+	1574959	1577073	2115	2115M	0.0425688	86.2938	NA	0.0549306	38.8778	NA
3c767bed-00b7-40b9-9e93-18e3c8e024bf.K562.5EU.60.labeled.heat.V;16_NM_001242659	chr1	+	1598017	1600121	2105	2105M	0.51461	40.1503	39.265	0.220448	52.1296	30.71
701f97ae-3862-4f70-a931-fa174aa1c292.K562.5EU.60.labeled.heat.V;16_chr1:1613000	chr1	+	1613762	1615762	2001	2001M	0.175094	49.1253	85.0325	0.0924196	30.6383	25.39
40635441-62be-45fa-9039-69b778b4bb7e.K562.5EU.60.labeled.I;0_NM_001170688	chr1	+	1615511	1617323	1813	123M874N107M463N246M	0.0924196	62.6087	165.97	0.0693147	62.6087	243.62
fd16d99e-fc7f-424e-92f1-a1c8dcaa0807.K562.5EU.60.labeled.IV;0_NM_001170688	chr1	+	1615871	1630606	14736	230M407N107M6816N269M74N172M849N107M89N195M100N143M117N108M996N105M82N163M74N134M88N149M228N157M189N161M93N127M89N234M410N179M73N182M72N66M587N315M	0.184839	62.6087	188.732	0.30543	46.8654	89.91
8ac7f60b-e4e6-446e-81f3-d85a79fbdb74.K562.5EU.60.labeled.I;16_chr1:1635000	chr1	+	1635226	1658961	23736	634M80N185M206N150M195N5D112M97N1M1I3M2D106M76N132M205N98M248N125M616N92M2I1M1688N170M595N70M1D2M547N155M79N6D94M384N123M2617N133M4231N2D1M2D2M1D139M2801N129M2802N116M1890N124M1415N48M	0.0652885	78.3609	127.245	0.109861	38.8778	NA
d9faebdf-7b20-4b8e-9ab9-9279f052b77f.K562.5EU.60.labeled.heat.III;16_chr1:1635000	chr1	+	1635226	1658961	23736	634M80N185M206N150M195N5D112M97N1M1I3M2D106M76N132M205N98M248N125M616N92M2I1M1688N171M4D3M595N62M1D2M547N155M79N6D94M384N123M2617N133M4231N2D1M2D2M1D139M2801N129M2802N116M1890N124M1415N48M	0.0652885	78.3609	NA	0.0763576	46.8654	85.43
3c2d55ca-52b9-4998-b46c-bc17605d3586.K562.5EU.60.labeled.VI;16_chr1:1635000	chr1	+	1635227	1638940	3714	633M80N185M206N150M195N5D321M76N435M248N125M616N439M	0.13412	26.3128	NA	NA	NA	NA
5ca13145-0acc-4404-a294-9e257b166977.K562.5EU.60.labeled.II;16_chr1:1635000	chr1	+	1635259	1641751	6493	601M80N541M195N5D112M97N1M1I3M2D106M76N435M248N125M616N92M2I1M1688N170M595N70M1D2M547N84M	0.0549306	38.8778	70.985	0.109861	38.8778	NA
8ac7f60b-e4e6-446e-81f3-d85a79fbdb74.K562.5EU.60.labeled.I;16_chr1:1635000-1	chr1	+	1635602	1658990	23389	258M80N185M206N150M195N5D112M97N1M1I3M2D106M76N132M205N98M248N125M616N92M2I1M1688N170M595N70M1D2M547N155M79N6D94M384N123M2617N133M4231N2D1M2D2M1D139M2801N129M2802N116M1890N124M1415N77M	NA	NA	NA	NA	NA	86.79
d331c154-fa17-4f54-b826-3823ce1eb6fe.K562.5EU.60.labeled.heat.III;16_chr1:1635000	chr1	+	1635602	1658961	23360	258M80N541M195N5D112M97N1M1I3M2D106M76N132M205N98M248N125M616N92M2I1M1688N170M595N70M1D2M547N155M79N6D94M384N123M2617N133M4231N2D1M2D2M1D139M2801N129M2802N116M1771N47M72N124M1415N48M	0.277259	20.2817	19.8875	0.0462098	62.6087	NA
99cd5e14-8216-4f76-b1ec-f98272b6d6f0.K562.5EU.0.unlabeled.II;16_chr1:1635000	chr1	+	1635602	1655450	19849	2284M11615N136M2801N129M2802N82M	0.12164	53.1793	-0.5	NA	NA	NA
5cfacff5-c398-4cfc-8115-6a62766ab250.K562.5EU.60.labeled.IV;16_chr1:1635000	chr1	+	1635602	1641773	6172	258M80N185M206N150M195N5D112M97N1M1I3M2D106M76N435M248N125M616N92M2I1M1688N170M595N70M1D2M547N106M	NA	NA	NA	NA	NA	NA
e0aae3a7-4176-4d9d-9572-51b54aa92993.K562.5EU.60.labeled.IV;16_chr1:1661000-1	chr1	+	1661479	1692813	31335	4541M2307N147M3D1188N72M2D359N55M1D2M1356N117M3833N127M473N140M1I1M179N465M15595N7D365M	0.431197	81.5283	155.54	0.384514	38.8778	235.5
e7f1ab4b-1c03-4223-b89e-1c4f12831723.K562.5EU.60.labeled.IV;16_chr1:1689000	chr1	+	1693565	1694310	746	746M	0.0202733	110.437	NA	NA	NA	NA
f99bb5c1-fbe7-4ef6-903b-c5ab0441f66a.K562.5EU.60.labeled.I;16_chr1:1702000	chr1	+	1702383	1709090	6708	620M80N185M206N150M194N5D173M227N805M616N2606M1D2M547N155M79N6D51M	0.0988514	50.8162	122.395	0.13412	26.3128	NA
d624be40-4f52-4b4e-922d-7a0176d50f7e.K562.5EU.60.labeled.IV;16_chr1:1702000	chr1	+	1702383	1708955	6573	620M80N541M194N5D112M97N1M1I3M2D106M76N808M616N92M2I1M1678N170M595N70M1D2M547N156M	0.164792	38.8778	NA	0.0828639	98.2946	NA
9d07b056-cd4a-472b-9163-252a2bc79df7.K562.5EU.60.labeled.heat.I;16_chr1:1702000	chr1	+	1702730	1724336	21607	273M80N185M206N150M194N5D112M97N1M1I3M2D106M76N118M210N107M248N125M616N92M2I1M1678N170M595N70M1D2M547N155M79N6D94M384N123M2623N133M3940N4D3M1D133M2879N99M2140N116M996N124M968N537M	0.0231049	62.6087	NA	0.13412	26.3128	88.21
a8254c4f-cc1c-4e36-a3f2-6408691b20db.K562.5EU.60.labeled.heat.I;16_chr1:1702000	chr1	+	1702730	1721711	18982	273M80N185M206N150M194N5D112M97N1M1I3M2D106M76N132M205N98M248N125M616N92M2I1M1678N170M595N70M1D2M547N155M79N6D94M384N123M2623N133M3940N4D3M1D133M2879N99M2140N116M	NA	NA	NA	NA	NA	NA
817898a9-fcb5-4f57-83ff-8fbbdeaf1132.K562.5EU.60.labeled.heat.III;16_chr1:1724000	chr1	+	1724884	1745980	21097	545M1D1M9266N143M3485N122M473N140M1I1M179N465M4546N422M1055N253M	NA	NA	NA	0.179176	23.5914	61.055
be85fb9c-ee2e-4178-b0fe-059cdbd906de.K562.5EU.60.labeled.IV;0_chr1:1724000	chr1	+	1727396	1733646	6251	6251M	NA	NA	NA	0.0231049	62.6087	NA
e188e43d-aac2-4e92-a7c1-5de0035400d3.K562.5EU.60.labeled.heat.III;16_chr1:1727000	chr1	+	1727396	1745980	18585	2285M5009N150M3485N122M473N140M1I1M179N465M4546N422M1055N253M	0.0763576	46.8654	NA	0.0202733	110.437	NA
a8169b0a-4b9d-4ecb-9ea3-15b4721ba713.K562.5EU.0.unlabeled.III;16_chr1:1751000	chr1	+	1751233	1757232	6000	1820M502N5M3D1M1D817M160N1802M154N5D105M572N53M	0.259678	58.3248	89.7775	0.0182322	271.042	NA
716ae748-2f6a-465b-aa94-1951b78c0f2d.K562.5EU.60.labeled.IV;16_chr1:1751000	chr1	+	1751233	1778438	27206	1820M992N1M1I4M1I158M75N99M160N156M675N106M781N84M154N5D105M572N127M4638N2D2M1D79M3194N3M2I220M12842N151M	0.179176	23.5914	NA	0.109861	38.8778	NA
719248de-9bac-44db-853d-ae62be4d75b5.K562.5EU.60.labeled.IV;16_chr1:1751000-3	chr1	+	1751233	1778438	27206	1820M502N5M3D1M1D91M401N151M75N99M160N156M675N106M781N84M154N5D105M572N127M4638N2D2M1D79M3194N3M2I220M12842N151M	1.83105	25.8177	86.27	0.883443	19.8858	126.595
1f7fe8f0-9099-4923-bb4d-d76b7663f07a.K562.5EU.1440.labeled.I;16_chr1:1751000	chr1	+	1751233	1778438	27206	1816M511N4M1D91M401N151M75N99M160N156M675N1235M572N127M4638N2D2M1D88M3192N216M12842N151M	0.0763576	46.8654	NA	0.0988514	50.8162	134.5
418cb237-f328-4ec2-bef4-eac80207e4c1.K562.5EU.60.labeled.IV;16_chr1:1751000	chr1	+	1751264	1754822	3559	3118M160N281M	0.088168	74.4112	43.4225	0.0763576	46.8654	NA
1eb4e529-cce4-4371-b54f-a2391eed5069.K562.5EU.1440.labeled.II;16_chr1:1752000	chr1	+	1752510	1778438	25929	551M1223N98M160N156M675N106M781N84M154N5D105M572N127M4638N2D2M1D79M3194N3M2I220M12842N151M	NA	NA	NA	NA	NA	NA
d70a8d89-e905-4676-8be7-99413efbb248.K562.5EU.60.labeled.IV;16_chr1:1785000	chr1	+	1785286	1891084	105799	1770M268N112M1615N218M1120N1M5D202M2648N62M11108N2M1I159M1892N1I1M2D74M9217N96M1968N3D1M3D42M7521N106M4D3M65316N260M	0.298459	123.563	73.96	0.341723	65.7513	124.62
3a6c619d-8890-48d6-a9fc-9cdf73ba6c01.K562.5EU.0.unlabeled.II;16_chr1:1785000	chr1	+	1785286	1891084	105799	1770M268N112M1615N218M1120N1M5D202M2648N62M11108N2M1I159M1892N1I1M2D74M9217N96M1968N3D1M3D42M7521N104M13690N54M51581N260M	0.919184	63.7869	106.868	0.697383	45.1025	130.35
3e33451b-d0c0-4637-a799-cc7011b49072.K562.5EU.0.unlabeled.II;16_chr1:1785000	chr1	+	1785286	1891161	105876	1770M268N112M1615N218M1120N1M5D202M2648N62M11108N2M1I159M1892N1I1M2D74M9217N96M1968N3D1M3D42M7521N104M13690N55M13331N105M471N148M1D3M37521N337M	0.627011	80.5445	109.45	0.383448	68.1562	106.15
fe64341a-6000-4727-8a1b-0eda2bed458f.K562.5EU.0.unlabeled.III;16_chr1:1785000	chr1	+	1785286	1891061	105776	1770M268N112M1615N218M1120N1M5D202M2648N62M11108N2M1I159M1892N1I1M2D74M9217N96M1968N3D1M3D42M7521N104M13690N49M40548N118M2I1M10919N237M	0.805784	52.6068	111.978	0.369678	62.6087	125.995
0c1857c2-5fb7-4cae-9e8a-38d8f7d481ee.K562.5EU.0.unlabeled.I;16_chr1:1785000-2	chr1	+	1785292	1891161	105870	1762M1D1M271N109M1615N218M1120N1M5D202M2648N62M11108N2M1I159M1892N1I1M2D74M9217N96M1968N3D1M3D42M7521N95M13694N2M1I1M3I56M51581N337M	0.275426	88.1317	122.015	0.167524	55.8758	101.56
0a3cabbd-6a84-46dc-b77b-344bdb7ecc49.K562.5EU.0.unlabeled.II;16_chr1:1786000	chr1	+	1786757	1891129	104373	299M268N275M1452N218M1120N1M5D202M2648N62M11108N2M1I159M1892N1I1M2D74M9217N96M1968N3D1M3D42M7521N104M13690N54M51581N305M	0.584512	22.8894	74.3275	0.184839	30.6383	96.035
cca2c4c4-b4bc-4176-bc48-c073636a0066.K562.5EU.60.labeled.II;16_chr1:1917000	chr1	+	1917590	1919271	1682	568M87N1M3D842M93N88M	0.0174735	626.064	75.9325	0.130777	43.6881	131.93
d7e87eec-3751-4554-95fc-f60d6bc02789.K562.5EU.60.labeled.IV;16_chr1:1917000	chr1	+	1917590	1919271	1682	568M87N1M3D182M461N199M93N88M	NA	NA	NA	0.0231049	62.6087	NA
3332bcea-f094-44ff-9e17-0b2084b1ace5.K562.5EU.0.unlabeled.III;16_chr1:2184000	chr1	+	2184471	2194761	10291	1045M8125N263M85N4M2D138M554N75M	0.200662	35.392	57.86	0.238202	32.7368	178.62
66d7301c-e069-438a-98f7-52e4bda2c4ac.K562.5EU.60.labeled.heat.I;16_chr1:2189000	chr1	+	2189547	2194761	5215	234M3857N266M115N2M2D110M554N75M	0.144551	54.7527	40.165	0.61578	15.9333	NA
0391a334-1718-43c4-bf9b-2086f3b2d664.K562.5EU.60.labeled.I;16_chr1:2189000	chr1	+	2189547	2199325	9779	234M3857N272M4096N135M606N2M5D572M	0.0924196	30.6383	28.5175	0.109861	38.8778	NA
892fc7b4-42f5-4cf1-9b0d-db08501d714a.K562.5EU.60.labeled.V;16_chr1:2189000	chr1	+	2189547	2194761	5215	234M3857N266M85N4M2D138M554N75M	0.94441	27.678	108.612	1.02675	25.4191	NA
892fc7b4-42f5-4cf1-9b0d-db08501d714a.K562.5EU.60.labeled.V;16_chr1:2189000-1	chr1	+	2189547	2194736	5190	234M3857N266M85N4M2D138M554N50M	0.359437	27.5138	81.2375	0.555739	16.3989	62.38
74de5b86-c9f1-4032-9398-b2d7c08efe25.K562.5EU.1440.labeled.II;16_chr1:2189000	chr1	+	2189547	2194761	5215	213M3881N263M85N4M2D138M554N75M	NA	NA	NA	NA	NA	NA
65b4d72c-bf7c-4317-8235-9f00b14a247b.K562.5EU.0.unlabeled.II;16_chr1:2189000	chr1	+	2189547	2194761	5215	231M3059N2M4D133M663N265M85N4M2D138M554N75M	1.33918	25.2805	63.11	0.839588	34.6636	72.545
baddc44d-6efe-480e-bb75-536c905dfcd3.K562.5EU.1440.labeled.II;16_chr1:2189000	chr1	+	2189547	2194761	5215	234M3857N265M143N2M2D5M2D76M554N75M	0.0202733	110.437	NA	NA	NA	NA
4d841f52-bc08-4482-9c0c-cfcadd0709f2.K562.5EU.60.labeled.IV;16_chr1:2189000	chr1	+	2189547	2194761	5215	629M3463N265M85N4M2D138M554N75M	1.43783	20.0404	54.4	0.849631	24.054	94.7
95dae3b5-fe71-42a1-b81b-636d0c7c3d9e.K562.5EU.60.labeled.II;16_chr1:2189000	chr1	+	2189547	2194761	5215	234M3857N272M777N75M	0.184839	30.6383	39.8475	0.227023	21.6944	NA
8c7eb4a5-91ec-4c50-8ac9-064b0092909e.K562.5EU.60.labeled.heat.III;16_chr1:2189000	chr1	+	2189547	2195059	5513	234M3857N266M85N4M2D137M700N228M	0.316201	42.8907	80.88	0.130777	43.6881	NA
6d601d18-c1a3-41b4-a7e1-f41f8ffd1e5a.K562.5EU.1440.labeled.II;16_chr1:2191000	chr1	+	2191901	2194761	2861	175M1D2M569N328M663N265M85N4M2D767M	0.210387	91.0784	152.74	0.150345	82.888	71.975
b76f010e-42e9-4b30-9114-cafc7fad461c.K562.5EU.60.labeled.III;0_NM_003036	chr1	+	2228732	2310115	81384	1004M73242N126M181N116M439N263M190N293M1434N4096M	0.144551	54.7527	57.645	0.13412	26.3128	NA
d5994e9a-df1f-4821-b122-96055be988a9.K562.5EU.60.labeled.heat.III;0_NM_003036	chr1	+	2303837	2310212	6376	266M190N293M1434N231M326N3636M	0.103094	100.711	16.1925	0.0179842	331.995	64.22
a2f1c614-b607-4573-a1b4-08ad0aad431a.K562.5EU.60.labeled.IV;0_chr1:2306000	chr1	+	2306430	2310115	3686	3237M38D411M	0.0988514	50.8162	66.1175	0.0202733	110.437	NA
dd9afacb-874a-4a52-8d7d-e950da117127.K562.5EU.60.labeled.VI;16_chr1:2378000	chr1	+	2378968	2391568	12601	262M2D3M3D2M5745N80M741N89M1522N1I106M709N101M1581N3M6D75M3D1458N110M	NA	NA	NA	0.0202733	110.437	NA
1049c926-84e7-4b16-9480-ebd58f7eb915.K562.5EU.60.labeled.IV;16_chr1:2383000-1	chr1	+	2383530	2391568	8039	1535M741N89M1522N1I106M709N101M1581N3M6D75M3D1458N110M	NA	NA	NA	0.0693147	62.6087	NA
89291385-bbf6-4913-bf19-3f0093fe74dc.K562.5EU.60.labeled.V;16_chr1:2384000-1	chr1	+	2384782	2391568	6787	283M741N89M1522N1I106M709N101M3118N2D116M	NA	NA	NA	0.0231049	62.6087	NA
2eff6df3-6327-44fe-9da2-b7d4c1ad0587.K562.5EU.60.labeled.heat.IV;0_NM_007033	chr1	+	2391778	2403221	11444	1578M1291N82M1055N88M1244N105M2194N100M1342N79M1271N136M692N187M	0.297982	86.2938	120.222	0.268815	99.2233	98.6
NM_007033_007033-2	chr1	+	2391819	2403221	11403	140M3825N88M1244N105M2194N100M1342N79M1271N136M692N187M	0.22225	72.0459	60.925	0.184839	62.6087	116
74f74167-f1d5-4212-ae2e-bf5a139f474b.K562.5EU.60.labeled.heat.V;0_NM_007033-2	chr1	+	2391819	2403725	11907	140M1249N148M2428N88M1244N105M2194N100M1342N79M1271N136M692N691M	0.51697	51.3792	83.18	0.653886	43.6881	86.48
94a19197-a6ff-4ef8-b735-65ba43e4973f.K562.5EU.0.unlabeled.II;0_NM_007033-2	chr1	+	2391819	2403301	11483	140M1311N86M2428N88M1244N105M2194N100M1342N79M1271N136M692N267M	0.601986	35.392	27.605	0.697383	45.1025	122.66
4271ab9f-feff-4075-b847-89069739af43.K562.5EU.60.labeled.I;0_NM_007033	chr1	+	2391854	2403221	11368	522M3408N88M1244N105M2194N100M1342N79M1271N136M692N187M	0.0693147	62.6087	64.2075	0.0924196	30.6383	NA
c5fbdb4d-e50f-43eb-a0d2-bbbbde35a22a.K562.5EU.0.unlabeled.II;0_NM_007033	chr1	+	2391854	2403766	11913	105M1249N148M1291N82M1055N88M1244N105M2194N100M1342N79M1271N136M692N732M	0.796311	59.8368	96.3475	0.513486	84.306	141.28
NM_007033_007033-3	chr1	+	2391854	2403221	11368	105M3825N88M1244N105M2194N100M1342N79M1271N136M692N187M	0.130777	43.6881	65.58	0.0626672	94.2796	NA
00c78561-a7b4-4887-bc5e-493d318a81cf.K562.5EU.60.labeled.II;0_NM_007033	chr1	+	2391854	2403725	11872	105M2688N82M1055N88M1244N105M2194N100M1342N79M1271N136M692N691M	0.468544	44.219	75.01	0.295551	66.235	82.96
b8b04dde-02f8-45e0-ab0c-e029bbff44f1.K562.5EU.60.labeled.heat.IV;16_chr1:2403000-1	chr1	+	2403974	2412541	8568	1860M649N139M6D1M94N175M1556N400M1510N3D3M1I79M1939N154M	0.254154	62.6087	33.75	0.314304	69.3462	141.7
42682625-c218-4aea-8380-fd616e338778.K562.5EU.60.labeled.heat.IV;16_chr1:2404000	chr1	+	2404805	2412541	7737	1029M649N139M6D1M94N229M1499N403M1510N3D3M1I79M1939N154M	0.190535	56.7178	6.77	0.130577	78.3609	117.55
ead17333-c793-474f-aafd-8b54564ebb2a.K562.5EU.60.labeled.IV;16_chr1:2508000	chr1	+	2508537	2526589	18053	524M801N69M1D6M2D2M1D2M122N89M520N109M555N48M240N53M1199N3M5D151M1D2M961N87M264N111M1095N158M2448N2I99M251N84M3D542N180M473N3D154M367N91M308N186M194N210M401N1M1D86M4663N127M	0.141913	110.437	93.635	0.203254	67.8478	129.505
391c8bd7-fb87-45c0-8c4f-ccf2777e4c87.K562.5EU.60.labeled.VI;16_chr1:2508000	chr1	+	2508537	2526589	18053	524M801N69M1D6M2D2M1D2M122N89M520N73M589N50M240N53M1199N3M5D151M1D2M961N87M264N111M1095N158M2448N2I434M3D542N180M473N3D154M367N91M308N186M194N210M401N1M1D86M4663N127M	0.0176675	467.806	NA	0.0191788	160.698	234.36
NM_014448_014448	chr1	+	3454754	3481111	26358	58M8254N607M2475N46M974N170M1542N57M496N161M3484N153M162N130M1185N75M1187N93M1812N152M397N189M904N74M221N102M534N664M	0.0383576	160.698	58.875	0.0191788	160.698	NA
NM_182752_182752-2	chr1	+	3624997	3630118	5122	277M150N92M197N177M1610N154M755N1710M	0.180197	68.5032	90.1925	0.167524	55.8758	93
46e910c5-63c0-4948-a708-8df6900b671d.K562.5EU.60.labeled.heat.V;16_chr1:3630000	chr1	+	3630780	3632677	1898	1898M	0.0594458	126.875	NA	0.0557859	214.086	167.55
a6875bc2-4be2-4b7e-8afb-9d6c3ac6142f.K562.5EU.60.labeled.IV;16_chr1:3630000-3	chr1	+	3630790	3650090	19301	327M348N193M555N126M1059N101M1492N2M1D78M85N135M648N3M1D87M964N105M1D1650N74M7843N109M624N1M1D159M2372N2I157M	0.0748564	200.421	149.37	0.15343	76.1027	188
03da8a10-10dc-457a-a082-396a9b291e60.K562.5EU.0.unlabeled.II;16_chr1:3630000	chr1	+	3630790	3650090	19301	868M555N126M1059N101M1492N2M1D78M85N135M648N3M1D87M964N105M1D1650N74M7843N109M624N1M1D159M2372N2I157M	0.136877	138.804	117.04	0.0352215	505.059	177.67
2cdfe483-9033-4208-addb-78ee932dd630.K562.5EU.60.labeled.heat.IV;16_chr1:3647000	chr1	+	3647059	3650090	3032	503M2372N2I157M	0.0693147	62.6087	53.03	0.0549306	38.8778	NA
02ad7b8f-ab20-4f2b-9fdd-fda1442cf54f.K562.5EU.60.labeled.heat.I;0_chr1:3710000	chr1	+	3710919	3712197	1279	1279M	NA	NA	NA	0.0231049	62.6087	NA
d15b2023-6ddb-44b9-8d07-3f9634b6676d.K562.5EU.0.unlabeled.II;16_chr1:3735000	chr1	+	3735642	3739302	3661	915M361N6D179M677N1523M	0.0652885	78.3609	NA	NA	NA	NA
3ee1c78c-a4ea-440e-87f8-aede17177456.K562.5EU.60.labeled.I;16_chr1:3735000	chr1	+	3735985	3747244	11260	4411M2416N93M148N2M1D131M2416N1642M	0.192901	83.6441	119.145	0.0178042	397.408	NA
f5828d8f-f437-4537-aa18-e694f6f87234.K562.5EU.60.labeled.IV;16_chr1:3737000	chr1	+	3737145	3747359	10215	1375M1719N157M2416N148M93N1M7D126M2416N1757M	0.255375	36.1713	27.715	0.130777	43.6881	187.055
40a2ac4a-9107-4006-84ea-b4a9e28be1e0.K562.5EU.60.labeled.III;16_chr1:3737000-2	chr1	+	3737187	3747363	10177	674M2378N157M2416N93M148N2M1D131M2416N1761M	0.0462098	62.6087	NA	NA	NA	NA
3f9d813e-1fab-40b8-a79a-e51272040162.K562.5EU.60.labeled.VI;16_chr1:3737000	chr1	+	3737238	3747344	10107	623M2378N157M2416N146M103N126M2416N1742M	NA	NA	NA	NA	NA	NA
NM_001288583_001288583-1	chr1	+	3772720	3775954	3235	69M274N119M2117N185M311N160M	1.02675	25.4191	19.5625	1.20661	18.0312	86.75
NM_001288583_001288583	chr1	+	3772758	3776710	3953	31M274N119M2117N185M311N916M	1.70566	27.3302	42.4875	3.63401	15.2277	87.56
54a457f5-eaa3-4ab0-9b76-ae520552ea3f.K562.5EU.60.labeled.VI;0_NM_001288583	chr1	+	3772758	3775954	3197	31M2510N185M311N160M	NA	NA	NA	0.179176	23.5914	NA
NM_001163724_001288583	chr1	+	3772788	3775954	3167	54M221N119M2117N185M311N160M	NA	NA	29	0.716704	23.5914	64.77
c7822fe3-4e4e-4fc1-8330-db7c540a987c.K562.5EU.60.labeled.II;0_NM_001288583	chr1	+	3772788	3775979	3192	54M2457N185M311N185M	0.0231049	62.6087	-0.5	0.12164	53.1793	NA
b7052631-da9c-4f2e-a55d-7b638d260ef3.K562.5EU.60.labeled.heat.IV;16_chr1:3780000	chr1	+	3780220	3786963	6744	1120M175N85M1059N107M1232N1208M1645N113M	0.228024	173.734	141.54	0.202733	110.437	168.05
01c08d23-f65e-44d1-b99d-449cd62fa6ab.K562.5EU.60.labeled.heat.III;16_chr1:3780000-1	chr1	+	3780241	3796506	16266	1099M175N85M1059N107M1232N114M972N3D119M1645N460M8551N645M	0.425738	110.437	90.7725	0.206189	100.711	108.68
f3133c2a-7c19-461b-a8a6-ec5214450f51.K562.5EU.60.labeled.heat.V;16_chr1:3814000	chr1	+	3814784	3857201	42418	733M762N90M6796N1M7D69M182N137M2195N111M503N67M271N36M2521N110M2D415N206M1048N175M2639N174M889N168M1402N196M4D5M595N228M1D2M1443N151M488N165M5127N2M3D81M307N2I63M6D2117N133M994N180M1I1M3514N125M4467N311M	0.831777	20.2817	62.1675	0.238202	32.7368	44.24
fefbf572-1208-4de3-b2a9-83514ce6635c.K562.5EU.0.unlabeled.II;16_chr1:3816000	chr1	+	3816149	3857201	41053	220M6796N1M7D69M182N137M2195N111M503N67M271N36M2521N110M2D415N206M1048N175M2639N174M889N168M1402N196M4D5M595N228M1D2M1443N151M488N165M5127N2M3D81M307N2I63M6D2117N133M994N180M1I1M3514N125M4467N311M	0.0231049	62.6087	NA	NA	NA	NA
146a8dd2-bc1a-48f5-8a40-b6667d577ec8.K562.5EU.60.labeled.heat.II;16_chr1:3822000	chr1	+	3822779	3857201	34423	463M182N137M2195N111M503N67M271N36M2521N110M2D415N206M1048N175M2639N174M889N168M1402N196M4D5M595N228M1D2M1443N151M488N165M5127N2M3D81M307N2I63M6D2117N133M994N180M1I1M3514N125M4467N311M	0.0191788	160.698	NA	0.088168	74.4112	104.47
4efaedbb-55a2-4633-bebe-805ac0ce78df.K562.5EU.0.unlabeled.III;16_chr1:3841000	chr1	+	3841835	3857201	15367	231M2832N2M7D77M307N2I63M6D2117N133M994N180M1I1M3514N125M4467N311M	NA	NA	NA	NA	NA	NA
NM_004402_001320136	chr1	+	3857281	3885424	28144	437M1000N127M6967N189M1973N80M1551N171M2696N101M10934N1918M	0.130577	78.3609	65.59	0.175094	49.1253	166.42
0e697a7d-fccc-451b-884b-b086f956a246.K562.5EU.60.labeled.VI;16_chr1:3889000-1	chr1	+	3889141	3900276	11136	935M2D493N489M1826N1I106M7173N2D110M	0.558828	82.6264	129.35	0.293178	93.1352	169.11
5008bf58-afc7-4e5e-8a50-cce691136f11.K562.5EU.60.labeled.V;0_chr1:3976000	chr1	+	3976153	3998751	22599	43M686N276M19649N126M1123N696M	0.146156	33.9811	33.48	0.0652885	78.3609	187.55
b6bb2580-5557-4569-ac58-e11476a49a8f.K562.5EU.60.labeled.IV;0_chr1:3976000	chr1	+	3976153	4012721	36569	43M686N276M35073N491M	0.22632	67.3235	90.305	0.107799	81.5283	NA
cdb250a0-b94a-49cc-982e-53e3ba4b9a52.K562.5EU.60.labeled.heat.I;0_chr1:3976000	chr1	+	3976153	4093058	116906	43M686N221M115690N266M	0.0924196	30.6383	NA	0.147743	89.7093	124.04
5395a670-26e3-4a4b-9c1d-8456356fe622.K562.5EU.60.labeled.V;0_chr1:3976000-1	chr1	+	3976153	3998783	22631	43M686N221M19704N126M1123N728M	0.0383576	160.698	113.998	0.277259	20.2817	NA
aee18d14-684e-41c8-89eb-cb485b5882e7.K562.5EU.60.labeled.heat.IV;0_chr1:3977000	chr1	+	3977061	4054894	77834	42M76985N807M	0.109861	38.8778	65.4725	0.146156	33.9811	92.545
68cbe88b-199e-4ae8-bd68-32c72b144bd2.K562.5EU.60.labeled.IV;0_chr1:3980000	chr1	+	3980630	3981754	1125	1125M	NA	NA	87.82	NA	NA	NA
c4355479-b17c-44ce-874e-82138647ccf8.K562.5EU.0.unlabeled.II;0_chr1:5603000	chr1	+	5603296	5604479	1184	1184M	0.180957	115.884	-1	0.0557859	214.086	-1
75183c2c-f0a8-4e6d-83f7-5679418d0eea.K562.5EU.60.labeled.heat.III;16_chr1:5862000	chr1	+	5862871	5904720	41850	542M484N139M300N4D182M1D2M583N166M2D3M1097N82M571N86M618N6D160M5355N81M1135N190M4D3M3D209N221M1992N199M2812N1I3M4D125M7046N186M3401N163M13589N1I101M	0.146156	33.9811	31.655	0.0652885	78.3609	158.29
2a0d298a-69c8-4374-a82c-26653e858f64.K562.5EU.0.unlabeled.III;0_chr1:5992000-1	chr1	+	5992678	6018968	26291	111M25846N334M	0.0988514	50.8162	20.32	0.0191788	160.698	NA
d975f831-8a09-4b9e-aedc-ca4c8c63d6af.K562.5EU.60.labeled.heat.III;16_chr1:6185000-2	chr1	+	6185032	6208793	23762	1782M6113N128M2D4595N107M1D2M2731N259M6D3M2D7922N109M	2.10739	39.1923	93.605	2.58197	32.952	116.06
27a22037-412a-48d5-9966-66a550139146.K562.5EU.0.unlabeled.II;16_chr1:6185000-1	chr1	+	6185032	6208793	23762	1782M6113N128M2D4595N106M1D3M10923N109M	2.51784	43.3892	NA	2.0177	39.5319	115.12
02eea2f9-d88d-45ca-841d-032c469cd3f9.K562.5EU.60.labeled.heat.II;16_chr1:6185000-2	chr1	+	6185057	6199546	14490	1757M6113N128M2D4595N105M1609N181M	0.763162	43.0283	85.1475	0.899046	32.3197	108.02
5bc24006-6229-4dc4-9511-ff58560547f0.K562.5EU.60.labeled.heat.IV;16_chr1:6186000	chr1	+	6186226	6199613	13388	588M10835N113M1805N47M	NA	NA	NA	NA	NA	NA
ad400e6a-b75b-41ab-b7f5-9eaea8ef5244.K562.5EU.1440.labeled.II;16_chr1:6186000	chr1	+	6186226	6199020	12795	588M6113N122M4603N105M1023N241M	0.0924196	30.6383	NA	0.13412	26.3128	NA
a43a0654-3072-4707-9c6d-fe1a2dcad1ea.K562.5EU.0.unlabeled.II;16_chr1:6186000-1	chr1	+	6186226	6199583	13358	487M4D6215N123M2D4595N110M1805N17M	NA	NA	NA	NA	NA	NA
211ed1f1-8759-4054-9a79-199e05950008.K562.5EU.1440.labeled.II;16_chr1:6186000	chr1	+	6186226	6197757	11532	589M6128N2D104M4603N106M	NA	NA	NA	0.0924196	30.6383	NA
a35cf586-f6a8-4e7d-b764-74c033f622f4.K562.5EU.60.labeled.IV;16_chr1:6185000-2	chr1	+	6186226	6199583	13358	588M6113N122M4603N110M1805N17M	NA	NA	58.32	0.383764	18.2912	50.59
c60634b0-f05b-43df-9e77-d120a6a250a7.K562.5EU.60.labeled.heat.III;16_chr1:6185000-2	chr1	+	6186226	6199583	13358	588M6113N128M2D4595N110M1805N17M	9.66897	23.7558	99.1475	11.7867	18.3434	97.88
c60634b0-f05b-43df-9e77-d120a6a250a7.K562.5EU.60.labeled.heat.III;16_chr1:6185000-3	chr1	+	6186226	6199613	13388	588M6113N128M2D4595N110M1805N47M	15.7184	21.1195	82.5975	13.8698	18.4237	93.58
9a128d6d-e6f0-4c9e-855d-233a40017654.K562.5EU.60.labeled.III;16_chr1:6186000-2	chr1	+	6186240	6209314	23075	574M6113N128M2D4595N107M1D2M2731N259M6D3M2D7922N49M1D1M391N2M3D183M	0.822981	17.907	110.912	0.454046	21.6944	109.11
73fcd5d8-26da-42d6-9420-855282744c73.K562.5EU.60.labeled.I;16_chr1:6186000-2	chr1	+	6186399	6199546	13148	407M6110N3M3D133M2D4595N105M1023N767M	0.58038	25.5248	NA	0.346736	34.8054	NA
34689cac-ee03-49f6-bc7a-bb1360b5aeed.K562.5EU.0.unlabeled.III;16_chr1:6186000	chr1	+	6186623	6208793	22171	191M6113N125M5D4595N107M1D2M2731N259M6D3M2D7922N109M	NA	NA	NA	NA	NA	NA
dd56fa18-74b5-423b-9104-a698527b9f5e.K562.5EU.0.unlabeled.III;16_chr1:6186000	chr1	+	6186623	6199543	12921	191M6113N128M2D4595N105M1589N2D196M	0.179176	23.5914	39.415	NA	NA	NA
c60634b0-f05b-43df-9e77-d120a6a250a7.K562.5EU.60.labeled.heat.III;16_chr1:6185000	chr1	+	6186623	6199583	12961	191M6113N128M2D4595N110M1805N17M	4.11078	24.3484	97.2725	5.73238	17.1299	71.8
acc0d3dc-83ae-4174-b45e-9b04ab08559d.K562.5EU.60.labeled.IV;16_chr1:6186000-1	chr1	+	6186623	6208830	22208	191M6113N128M2D4595N107M1D2M2731N344M7848N146M	0.219722	38.8778	48.675	NA	NA	72
65ddf1b5-b552-4391-812d-5c88ef52ecd5.K562.5EU.60.labeled.heat.I;16_chr1:6186000	chr1	+	6186623	6199546	12924	191M6113N128M2D4595N105M1682N108M	0.146156	33.9811	NA	NA	NA	NA
02eea2f9-d88d-45ca-841d-032c469cd3f9.K562.5EU.60.labeled.heat.II;16_chr1:6185000	chr1	+	6186623	6199546	12924	191M6113N128M2D4595N105M1609N181M	0.179176	23.5914	NA	0.0425688	86.2938	NA
c5907667-1f67-4ed1-ada8-ce84f1813a9a.K562.5EU.1440.labeled.I;16_chr1:6186000	chr1	+	6186623	6199583	12961	191M6113N127M1D2M4592N113M1805N17M	0.883443	19.8858	52.735	0.730558	21.1804	85.45
2c9aa724-f2f1-4470-afe7-81ccf20deaa2.K562.5EU.1440.labeled.II;16_chr1:6186000	chr1	+	6186623	6199546	12924	191M6113N128M2D4595N107M1D2M1193N592M	0.329584	19.18	NA	0.227023	21.6944	199.03
11d1b020-4013-4d10-b832-9953f9a30ad8.K562.5EU.60.labeled.V;16_chr1:6186000	chr1	+	6186623	6199583	12961	191M6113N128M2D4595N105M1023N130M652N22M	0.503726	20.9408	NA	0.255375	36.1713	91.47
b862980e-3a0a-4172-957c-1fd5d907a8f8.K562.5EU.1440.labeled.II;16_chr1:6186000	chr1	+	6186623	6209355	22733	191M6113N128M2D4595N107M1D2M2731N258M7922N61M1D1M391N2M3D224M	0.329584	19.18	NA	0.317706	28.9322	119.27
02eea2f9-d88d-45ca-841d-032c469cd3f9.K562.5EU.60.labeled.heat.II;16_chr1:6185000-1	chr1	+	6186623	6199583	12961	191M6113N128M2D4595N105M1609N218M	0.18546	42.3201	100.07	0.184839	30.6383	NA
ff04e917-ed13-4581-b12f-d5cec6849c63.K562.5EU.60.labeled.VI;16_chr1:6185000	chr1	+	6186623	6199583	12961	192M6128N2D110M2D4595N110M1805N17M	0.681069	21.6944	74.94	NA	NA	NA
ff04e917-ed13-4581-b12f-d5cec6849c63.K562.5EU.60.labeled.VI;16_chr1:6185000-1	chr1	+	6186623	6199613	12991	192M6128N2D110M2D4595N110M1805N47M	1.2127	19.6993	73.12	1.17121	16.1585	121.12
c281f28f-7da6-4b29-9060-d55d55aa7fb3.K562.5EU.0.unlabeled.II;16_chr1:6186000	chr1	+	6186623	6199583	12961	191M6113N125M5D4595N110M1805N17M	0.670527	24.1751	73.69	NA	NA	106.56
18e37e5f-3a63-4a34-9d55-b7dceba19ab6.K562.5EU.1440.labeled.II;16_chr1:6186000	chr1	+	6186623	6209355	22733	191M6113N128M2D4595N106M1D3M10923N49M1D1M391N2M3D224M	0.179176	23.5914	NA	0.179176	23.5914	NA
9a128d6d-e6f0-4c9e-855d-233a40017654.K562.5EU.60.labeled.III;16_chr1:6186000	chr1	+	6186623	6209355	22733	191M6113N128M2D4595N107M1D2M2731N259M6D3M2D7922N49M1D1M391N2M3D224M	0.164792	38.8778	69.395	0.175094	49.1253	137.48
a35cf586-f6a8-4e7d-b764-74c033f622f4.K562.5EU.60.labeled.IV;16_chr1:6185000	chr1	+	6186623	6199583	12961	191M6113N122M4603N110M1805N17M	NA	NA	NA	0.179176	23.5914	47.55
a35cf586-f6a8-4e7d-b764-74c033f622f4.K562.5EU.60.labeled.IV;16_chr1:6185000-1	chr1	+	6186623	6199613	12991	191M6113N122M4603N110M1805N47M	0.13412	26.3128	25.485	0.227023	21.6944	51.67
94b49d22-5482-4aca-96db-37736d516caf.K562.5EU.1440.labeled.I;16_chr1:6186000-1	chr1	+	6186623	6199117	12495	191M10835N1469M	0.0383576	160.698	279.92	0.0924196	62.6087	219.495
9a128d6d-e6f0-4c9e-855d-233a40017654.K562.5EU.60.labeled.III;16_chr1:6186000-1	chr1	+	6186623	6209329	22707	191M6113N128M2D4595N107M1D2M2731N259M6D3M2D7922N49M1D1M391N2M3D198M	NA	NA	NA	NA	NA	NA
225ffcd5-838f-437c-8aec-e70ab95d9217.K562.5EU.60.labeled.V;16_chr1:6186000	chr1	+	6186623	6199613	12991	191M6113N122M4599N114M1805N47M	0.277259	20.2817	NA	0.402359	26.3128	80.515
a9b21351-fd28-4b3e-8d76-763f87c4a1a8.K562.5EU.60.labeled.I;16_chr1:6186000	chr1	+	6186623	6199583	12961	210M6091N131M2D4595N110M1805N17M	0.13412	26.3128	NA	NA	NA	NA
acc0d3dc-83ae-4174-b45e-9b04ab08559d.K562.5EU.60.labeled.IV;16_chr1:6186000	chr1	+	6186623	6208793	22171	191M6113N128M2D4595N107M1D2M2731N344M7848N109M	NA	NA	NA	NA	NA	NA
28f17cfe-35d9-4e8b-b719-9aaf9da4b071.K562.5EU.60.labeled.heat.V;16_chr1:6185000	chr1	+	6186623	6199583	12961	191M6113N128M2D4595N99M1811N22M	NA	NA	NA	NA	NA	NA
30b28a93-9fdd-4da1-bffa-283c9479de73.K562.5EU.0.unlabeled.III;16_chr1:6186000	chr1	+	6186623	6208790	22168	192M6128N2D110M2D4595N107M1D2M2731N259M6D3M2D7922N106M	NA	NA	NA	NA	NA	NA
18e37e5f-3a63-4a34-9d55-b7dceba19ab6.K562.5EU.1440.labeled.II;16_chr1:6186000-1	chr1	+	6186623	6209329	22707	191M6113N128M2D4595N106M1D3M10923N49M1D1M391N2M3D198M	0.219722	38.8778	NA	0.329584	19.18	NA
c880fe4f-a3ef-49be-a898-d61ded544cb2.K562.5EU.0.unlabeled.I;16_chr1:6186000	chr1	+	6186623	6209355	22733	210M6106N4M2D110M2D4595N107M1D2M2731N259M6D3M2D7922N49M1D1M391N2M3D224M	0.0549306	38.8778	NA	NA	NA	NA
c60634b0-f05b-43df-9e77-d120a6a250a7.K562.5EU.60.labeled.heat.III;16_chr1:6185000-1	chr1	+	6186623	6199613	12991	191M6113N128M2D4595N110M1805N47M	6.94689	19.7232	71.0575	6.75703	20.1797	78
65ddf1b5-b552-4391-812d-5c88ef52ecd5.K562.5EU.60.labeled.heat.I;16_chr1:6186000-1	chr1	+	6186627	6199546	12920	187M6113N128M2D4595N96M1689N1M2I1M5I108M	0.0462098	62.6087	NA	NA	NA	NA
28f17cfe-35d9-4e8b-b719-9aaf9da4b071.K562.5EU.60.labeled.heat.V;16_chr1:6185000-1	chr1	+	6186636	6199583	12948	178M6113N128M2D4595N99M1811N22M	NA	NA	NA	NA	NA	NA
225ffcd5-838f-437c-8aec-e70ab95d9217.K562.5EU.60.labeled.V;16_chr1:6186000-1	chr1	+	6186655	6199583	12929	159M6113N122M4599N114M1805N17M	NA	NA	NA	NA	NA	NA
f555f502-3ce0-4714-88fd-44fc1ae71ed8.K562.5EU.60.labeled.heat.II;16_chr1:6204000	chr1	+	6204843	6205420	578	578M	0.0763576	46.8654	113.69	NA	NA	NA
6ad4f8c8-0dda-4baf-be0b-14bf5cf8b939.K562.5EU.60.labeled.VI;16_chr1:6204000	chr1	+	6204847	6209355	4509	569M3269N2I49M1D1M391N2M3D224M	0.238202	32.7368	42.82	0.0924196	30.6383	62.93
fe46f16f-5624-42d4-a21f-28c38454e82a.K562.5EU.60.labeled.heat.III;16_chr1:6221000	chr1	+	6221209	6235923	14715	4052M6639N222M2767N1I86M525N424M	0.333375	72.0459	11.08	0.439445	38.8778	152.7
d5186a80-1ee9-4dce-bb60-9bb366a5c023.K562.5EU.60.labeled.IV;16_chr1:6221000-2	chr1	+	6221320	6235969	14650	3941M6639N222M1354N164M761N106M369N1M5D89M746N253M	0.0575364	160.698	53.4275	0.107799	81.5283	62.52
b5673d6c-56c0-4599-9175-d4feb90223d1.K562.5EU.0.unlabeled.II;16_chr1:6223000	chr1	+	6223496	6235956	12461	1765M6639N222M1354N164M761N106M369N1M5D93M742N240M	0.150345	82.888	67.9	0.0924196	62.6087	94.38
fd2ffdf3-b9b0-41c4-9929-f8ac0fe4a54e.K562.5EU.60.labeled.heat.V;16_chr1:6223000-1	chr1	+	6223496	6235983	12488	1765M6639N222M1354N164M1242N93M742N267M	0.125334	94.2796	119.835	0.240245	41.5581	92.535
e17abb88-b173-42e5-ac6b-c3ae35c42539.K562.5EU.60.labeled.heat.IV;16_chr1:6247000	chr1	+	6247354	6261078	13725	3276M1D1M3924N460M1D5809N253M	NA	NA	NA	NA	NA	NA
b9e569be-1ac6-413e-aee2-d423ea472537.K562.5EU.60.labeled.heat.V;16_chr1:6264000	chr1	+	6264272	6339590	75319	426M30168N113M23511N89M8720N115M6063N90M5860N4D160M	0.0652885	78.3609	NA	0.0425688	86.2938	NA
0bca1773-a86d-47d8-a9c4-45a43cb8a01d.K562.5EU.0.unlabeled.III;16_chr1:6264000	chr1	+	6264272	6393341	129070	426M16410N1I181M13577N113M23511N89M8720N115M6063N90M5860N4D160M1D10158N118M3D5M43387N79M	0.13412	26.3128	NA	0.0693147	62.6087	-1
3a8d62f9-0948-4834-a4f8-bc2e4db99777.K562.5EU.0.unlabeled.III;16_chr1:6264000-1	chr1	+	6264272	6393397	129126	425M1D16405N186M13577N113M23511N89M8720N115M6063N90M5860N4D160M1D10158N118M3D5M43387N135M	1.32031	47.17	69.535	1.15354	38.8778	67.095
758c2283-318b-4f61-bff7-ac11360c6bae.K562.5EU.60.labeled.VI;0_chr1:6455000	chr1	+	6455723	6456660	938	938M	0.0231049	62.6087	NA	NA	NA	NA
ed0a0b47-b00d-4126-a962-152167e666a4.K562.5EU.60.labeled.IV;16_chr1:6521000	chr1	+	6521349	6522297	949	949M	NA	NA	91.265	0.088168	74.4112	29.42
3f9f7358-f0eb-4051-879f-0545392f7586.K562.5EU.60.labeled.VI;16_chr1:6525000	chr1	+	6525580	6554502	28923	413M699N1M6I3M1I133M2159N5D177M2793N3D113M380N1M3D300M519N154M16947N5M7D220M3491N397M	0.0425688	86.2938	17.48	NA	NA	NA
322bd35a-2f3b-435d-94c9-2df33735e9f2.K562.5EU.60.labeled.heat.IV;16_chr1:6525000	chr1	+	6525666	6554523	28858	338M692N133M2159N5D177M2793N3D113M380N1M3D300M519N164M8388N94M2898N97M122N136M4390N129M1D696N218M3491N418M	0.0693147	62.6087	106.365	0.0182322	271.042	91.23
NM_001278648_001278647	chr1	+	6580007	6589268	9262	64M470N759M758N242M3619N112M664N93M417N87M186N155M427N137M81N165M313N89M71N353M	0.0988514	50.8162	65.725	0.111125	72.0459	186.35
NM_001278647_001278647	chr1	+	6580007	6589268	9262	43M491N759M758N242M3619N112M664N93M417N87M186N155M427N137M81N165M313N89M71N353M	0.0549306	38.8778	NA	0.0405465	110.437	72.36
NM_005341_001278647	chr1	+	6580050	6589268	9219	87M404N759M758N242M3619N112M664N93M417N87M186N155M427N137M81N165M313N89M71N353M	0.0626672	94.2796	76.8325	0.0405465	110.437	97.3
4f4e1722-b9a4-492f-b167-8cc14c0fd706.K562.5EU.60.labeled.heat.I;16_chr1:6590000	chr1	+	6590725	6591039	315	315M	NA	NA	NA	NA	NA	135.16
b94ade60-52db-4ec0-8a2c-3078597e72d1.K562.5EU.60.labeled.IV;16_chr1:6590000	chr1	+	6590737	6602855	12119	2924M1826N73M3489N401M2344N1062M	0.601986	35.392	103.79	0.0999183	120.264	160.82
b5a334d4-6b8b-4812-9b0a-81ddcfab0658.K562.5EU.60.labeled.VI;16_chr1:6590000	chr1	+	6590737	6602855	12119	4823M3489N401M2344N1062M	0.463709	52.6822	11.4075	0.147743	89.7093	226.66
NM_153812_153812-2	chr1	+	6613767	6624028	10262	339M2651N102M2944N535M1073N2618M	0.647107	55.6262	103.052	0.203254	67.8478	91.265
9b581cc4-8008-441b-aa9c-dbb1ba443bb1.K562.5EU.60.labeled.heat.V;0_NM_138350-2	chr1	+	6625166	6633565	8400	127M3206N193M1596N66M2037N105M300N770M	0.277259	20.2817	98.4925	0.277259	20.2817	130.25
d880253b-c47d-41be-886c-f096b44ced34.K562.5EU.1440.labeled.II;0_NM_001195752	chr1	+	6625196	6633565	8370	97M3206N193M951N82M563N66M2037N105M300N770M	0.0924196	30.6383	32.065	0.109861	38.8778	41.26
e0c5b941-cff8-4a6d-8a22-2d869c8e96b5.K562.5EU.60.labeled.I;0_NM_138350	chr1	+	6625196	6633565	8370	97M2470N929M1596N66M2037N1175M	0.184839	30.6383	82.1525	NA	NA	NA
28054e9b-9548-49ac-a535-a74b13c0bde0.K562.5EU.0.unlabeled.II;16_chr1:6634000	chr1	+	6634159	6701809	67651	1542M2D414N132M951N140M106N59M792N2I67M1537N156M4500N115M362N1M1D2M3D89M6D2M3D1M653N184M5550N76M1226N117M959N132M13669N95M10583N82M2440N129M20691N82M	0.908235	72.9686	141.395	0.586701	68.0494	158.44
a2a3bf88-6f9f-439b-85d5-a9bfd8a9c145.K562.5EU.0.unlabeled.III;16_chr1:6635000	chr1	+	6635115	6701809	66695	586M2D414N132M951N1164M110N146M1282N155M4500N115M362N1M1D2M3D89M6D2M3D1M653N184M5550N76M1226N1208M13669N101M10583N76M2440N129M20691N82M	0.0185953	214.086	NA	0.0182322	271.042	NA
c799d8bc-9e14-4f19-a232-13adc8185296.K562.5EU.60.labeled.IV;16_chr1:6645000	chr1	+	6645992	6647381	1390	1390M	0.0191788	160.698	-0.5	0.0191788	160.698	NA
a298ff3f-dac7-491d-99d8-fd57b0b7fe36.K562.5EU.1440.labeled.II;16_chr1:6652000	chr1	+	6652461	6701809	49349	1827M13421N100M10583N76M2440N129M20691N82M	0.0231049	62.6087	NA	0.0924196	30.6383	106.31
98c9dbc0-fb04-43e5-9eb4-c02243964df8.K562.5EU.0.unlabeled.I;16_chr1:6672000	chr1	+	6672179	6701809	29631	152M6065N72M2440N129M20691N82M	NA	NA	NA	NA	NA	NA
3370af7f-da70-4d24-8241-840e1cf185bb.K562.5EU.60.labeled.IV;16_chr1:6783000	chr1	+	6783894	6784967	1074	1074M	NA	NA	NA	NA	NA	NA
8932368f-d13f-4616-97dc-9d14254c4b98.K562.5EU.60.labeled.heat.I;0_NM_001195563-2	chr1	+	6785355	6872013	86659	221M34605N70M4841N119M27841N138M18567N257M	0.433652	54.7527	104.38	0.251403	48.448	171.43
NM_001242701_001195563	chr1	+	6785443	6888192	102750	133M34605N70M4841N119M62443N539M	0.0763576	46.8654	NA	0.0231049	62.6087	NA
a125eb35-deeb-4a02-b22d-4999ec085cf9.K562.5EU.60.labeled.heat.V;0_NM_001195563	chr1	+	6785466	6872013	86548	110M21407N106M13092N70M4841N119M46546N257M	0.363648	163.426	79.5725	0.493588	83.1838	121.07
NR_038934_038934	chr1	+	6785466	6888192	102727	110M39516N119M46546N84M15813N539M	NA	NA	NA	NA	NA	NA
8932368f-d13f-4616-97dc-9d14254c4b98.K562.5EU.60.labeled.heat.I;0_NM_001195563-1	chr1	+	6785466	6872032	86567	110M34605N70M4841N119M27841N138M18567N276M	0.273042	91.8163	102.87	0.0986869	130.199	141.16
d9f2fc42-3e61-4ef9-8b44-8bb4e783c13f.K562.5EU.60.labeled.IV;0_NM_001195563	chr1	+	6785466	6888192	102727	110M34605N70M4841N119M46546N84M14399N107M1307N539M	0.164792	38.8778	17.6475	NA	NA	NA
f0209cdb-60d8-460a-9b36-129fb67332b8.K562.5EU.0.unlabeled.III;0_NM_001195563	chr1	+	6785466	6888192	102727	110M34605N70M4841N119M46546N84M15813N539M	NA	NA	NA	0.0231049	62.6087	NA
88157169-1015-4d4b-9ba1-438beb7cb92a.K562.5EU.60.labeled.IV;0_NR_038934	chr1	+	6785488	6872013	86526	88M21407N106M18003N119M46546N257M	0.0392551	135.208	88.475	NA	NA	111.92
NM_004781_004781-3	chr1	+	7771308	7781431	10124	78M2056N70M3648N159M799N52M1456N1806M	0.813908	61.2623	104.812	0.480419	47.6988	86.125
436384bf-0405-4f0d-aebb-5ef55a318934.K562.5EU.60.labeled.heat.V;0_NM_004781	chr1	+	7776085	7781356	5272	2085M1456N1731M	0.0202733	110.437	NA	0.0425688	86.2938	193.095
c762da4c-9f9d-4e58-839d-dc28b82ccab1.K562.5EU.60.labeled.heat.I;16_chr1:7809000	chr1	+	7809142	7827382	18241	1033M1316N113M15442N106M193N38M	0.0462098	62.6087	NA	0.0549306	38.8778	NA
d83a1376-c3a5-4cab-97b6-79c723121e73.K562.5EU.60.labeled.V;16_chr1:7810000	chr1	+	7810239	7827382	17144	478M2D2M770N113M15442N106M193N38M	NA	NA	50.405	NA	NA	NA
6650fd4a-bcae-4c79-8dc5-3b19d2213ce0.K562.5EU.60.labeled.IV;0_NM_001289861	chr1	+	7827419	7845169	17751	397M2021N67M48N210M5600N184M1053N151M5522N2498M	0.0175601	543.791	104.49	NA	NA	53.64
3fdbf46d-4506-4a49-92b1-f4d370e8def1.K562.5EU.60.labeled.V;0_NM_001289861-1	chr1	+	7827419	7845182	17764	397M2018N70M48N210M5600N184M1053N151M5522N2511M	0.0351202	543.791	103.61	0.0583832	143.621	109.05
c258177f-9954-449e-a96c-23124919bbf7.K562.5EU.60.labeled.II;0_NM_001289861	chr1	+	7827439	7845176	17738	377M2021N78M54N193M5600N184M1053N151M5476N2551M	0.199837	120.264	107.828	0.0172919	919.561	129.155
9db251c7-a9a9-40ba-88f0-18cdcfa3a8ed.K562.5EU.0.unlabeled.III;16_chr1:7915000	chr1	+	7917599	7919414	1816	1816M	0.0202733	110.437	83.15	NA	NA	NA
NM_001123377_001123377	chr1	+	7961671	7985257	23587	65M1027N113M2448N102M3919N60M1489N70M6688N87M7155N364M	0.369678	30.6383	54.7525	0.26824	26.3128	NA
3f555c2a-78ec-4915-9170-9de8940af890.K562.5EU.60.labeled.IV;0_NM_001123377	chr1	+	7961671	7985281	23611	65M1027N113M2448N102M3919N60M1489N75M6683N87M7155N388M	0.739357	15.1579	59.6375	0.317706	28.9322	83.42
6e784a42-a373-4a0a-8ac5-1b1bb639062e.K562.5EU.60.labeled.IV;0_NM_001123377-1	chr1	+	7961671	7985281	23611	123M969N113M2448N102M3919N60M1489N75M6683N87M7155N388M	0.175094	49.1253	NA	0.312537	24.8163	NA
7d88588f-3f5a-4fab-82c3-5898f0244e49.K562.5EU.1440.labeled.II;0_NM_001123377	chr1	+	7961671	7985281	23611	123M969N113M2448N102M3659N64M196N60M1489N70M6688N87M7155N388M	7.27622	19.6993	95.45	5.54562	17.7139	113.23
NM_001123377_001123377-3	chr1	+	7961671	7985281	23611	65M1027N113M2448N102M3919N60M1489N70M6688N87M7155N388M	4.89652	21.8434	76.885	3.88162	20.2817	100.085
NM_001123377_001123377-2	chr1	+	7961703	7985281	23579	33M1027N113M2448N102M3919N60M1489N70M6688N87M7155N388M	2.02779	22.5668	74.6	2.32929	23.5914	68.48
NM_007262_001123377-1	chr1	+	7961703	7985281	23579	91M969N113M2448N102M3919N60M1489N70M6688N87M7155N388M	2.02075	30.1162	90.87	2.24167	21.0195	116.59
NM_007262_001123377-2	chr1	+	7961703	7985257	23555	91M969N113M2448N102M3919N60M1489N70M6688N87M7155N364M	0.0549306	38.8778	41.3225	0.227023	21.6944	89.63
ceadd3ca-b4de-4fd9-b6d5-eb9b9a9f577d.K562.5EU.60.labeled.II;0_NM_001123377	chr1	+	7961703	7985275	23573	91M969N113M2454N96M3919N60M1489N70M6688N87M7155N382M	0.451223	28.1921	30.155	0.312537	24.8163	61.16
542ed608-03eb-49a9-822c-e5a0ee35c8e3.K562.5EU.60.labeled.IV;0_NM_001123377	chr1	+	7961703	7985281	23579	33M1027N113M14776N87M7155N388M	0.0924196	30.6383	NA	0.164792	38.8778	60.86
e32498e5-6992-4c1b-8d43-c9f750e3af5f.K562.5EU.60.labeled.heat.V;0_NM_001123377	chr1	+	7961703	7985281	23579	33M1027N113M2448N102M3919N60M1489N70M13930N388M	NA	NA	NA	0.0202733	110.437	NA
ddb33404-8657-48e3-8091-3f5ae1eb1039.K562.5EU.1440.labeled.II;0_NM_001123377	chr1	+	7961703	7985281	23579	33M1027N113M8018N70M6688N87M7155N388M	0.164792	38.8778	NA	NA	NA	68.8
58435460-e13c-43bd-9158-2eead7064361.K562.5EU.60.labeled.IV;0_NM_001123377	chr1	+	7961728	7985281	23554	354M681N113M2448N102M3919N60M1489N70M6688N87M7155N388M	1.1376	29.2185	84.715	0.883443	19.8858	42.48
NM_007262_001123377-3	chr1	+	7961728	7985281	23554	66M969N113M2448N102M3919N60M1489N70M6688N87M7155N388M	1.56609	26.5956	75.675	0.994437	28.4315	103.405
4ed9072a-8ab8-4c4e-aeeb-f2c1a06b375d.K562.5EU.60.labeled.II;0_NM_001123377	chr1	+	7962783	7985281	22499	93M1123N131M1194N102M3919N60M1489N70M6688N87M7155N388M	0.220448	52.1296	51.4875	0.292311	33.9811	90.96
5dafd4b0-7751-4339-9c13-a1ca1b0f633d.K562.5EU.60.labeled.I;0_chr1:7970000	chr1	+	7970793	7971962	1170	1170M	0.0549306	38.8778	NA	0.0231049	62.6087	NA
2f1107ef-37fd-4e5e-9d07-d9b307974d06.K562.5EU.60.labeled.VI;0_chr1:8000000	chr1	+	8000575	8004692	4118	154M3259N705M	0.0202733	110.437	NA	NA	NA	NA
31d912a3-11a8-4612-8800-6e647ed19118.K562.5EU.60.labeled.IV;16_chr1:8011000	chr1	+	8011725	8015593	3869	2671M911N78M110N99M	0.144551	54.7527	127.132	0.127706	86.2938	185.16
fb51867f-10ad-4c7c-a788-6cdb3a89a6e4.K562.5EU.60.labeled.heat.III;16_chr1:8352000	chr1	+	8352435	8360660	8226	2686M979N145M1949N723M849N2I214M123N3M2D553M	0.250669	94.2796	138.925	0.236618	57.8963	119.5
400bdfa6-e048-4924-a848-d568e66f00cf.K562.5EU.60.labeled.I;16_chr1:8785000	chr1	+	8785234	8786810	1577	1577M	NA	NA	NA	NA	NA	NA
d9c77068-88dc-4b04-a484-df0157b32cc8.K562.5EU.1440.labeled.II;16_chr1:8803000	chr1	+	8803102	8809980	6879	6879M	0.0549306	38.8778	NA	NA	NA	NA
57269bc7-ca04-4dad-876b-753a2044fab5.K562.5EU.0.unlabeled.II;16_chr1:8861000	chr1	+	8861000	8878676	17677	430M1457N59M289N107M547N204M1192N197M796N183M2D655N133M737N66M2391N2M2D1M1D58M1380N85M2842N2M5I102M3664N2I93M	0.452639	67.3235	69.175	0.659167	38.8778	75.57
a6fd9f00-0553-47d7-906d-5966c13726de.K562.5EU.1440.labeled.II;16_chr1:8860000	chr1	+	8861000	8867605	6606	430M1457N455M547N1593M796N223M615N490M	0.310174	36.6657	60.52	0.0693147	62.6087	60.55
2a6b1f94-e1e0-4c79-9a2e-c369952ded65.K562.5EU.1440.labeled.II;16_chr1:8861000	chr1	+	8861000	8878676	17677	430M1457N59M289N107M547N204M1192N197M796N223M615N135M737N66M3831N4M2D100M6593N93M	1.04204	50.2529	70.8675	0.802649	35.392	70.23
b8ae9453-97c6-4f4f-aeea-50250e8af8b7.K562.5EU.60.labeled.heat.III;16_chr1:8861000	chr1	+	8861000	8874895	13896	430M1457N59M289N107M547N146M1238N6M2I203M796N223M615N135M737N66M2391N2M2D1M1D58M1380N85M2842N2M5I78M	0.718874	27.5138	23.625	0.660878	32.1677	31.44
59d74dea-4537-4f9b-87e6-3e07607a460b.K562.5EU.1440.labeled.II;16_chr1:8861000	chr1	+	8861000	8878676	17677	430M1457N59M289N107M547N204M1192N197M796N223M615N135M737N45M2D4M2416N54M1380N96M2837N98M3664N2I93M	1.02388	38.2222	37.57	0.535314	41.2911	79
be25e931-efa6-41cc-9594-d38166b2ebb7.K562.5EU.60.labeled.heat.IV;16_chr1:8860000	chr1	+	8861000	8878676	17677	413M1464N2M2I5M3D59M289N107M547N204M1192N197M796N223M615N135M737N66M2391N2M2D1M1D58M1380N85M2842N2M5I102M3664N2I93M	0.392332	43.6881	NA	0.50228	29.5753	39.24
2a6b1f94-e1e0-4c79-9a2e-c369952ded65.K562.5EU.1440.labeled.II;16_chr1:8861000-1	chr1	+	8861000	8878610	17611	430M1457N59M289N107M547N204M1192N197M796N223M615N135M737N66M3831N4M2D100M6593N27M	1.4042	28.6974	49.3475	1.30384	27.6329	36.02
04047f57-a102-4049-9ffa-fa22baeae8c0.K562.5EU.60.labeled.IV;16_chr1:8861000	chr1	+	8861000	8878676	17677	430M1457N59M289N107M547N204M1192N197M796N223M615N135M737N71M2405N2I45M1380N96M2837N98M3664N2I93M	0.904408	45.0521	90.065	1.20146	30.6383	81.42
73b90fa2-6679-49d1-9c15-c5f635df9b1c.K562.5EU.60.labeled.IV;16_chr1:8861000	chr1	+	8861000	8878676	17677	430M1457N455M547N204M1192N197M796N223M615N135M737N66M2391N2M2D1M1D58M1380N85M2842N2M5I102M3664N2I93M	1.87568	31.7256	66.49	1.08361	32.041	82
dad40d19-40ef-4b58-98b6-2ea7f126be57.K562.5EU.60.labeled.VI;16_chr1:8861000	chr1	+	8861000	8878676	17677	430M1457N59M289N107M547N204M1192N197M796N223M615N135M737N66M2391N2M2D1M1D1534M2837N98M3664N2I93M	1.62471	34.5115	72.73	1.22948	32.2789	58.375
8bcfc766-a22c-4ba2-b2a5-0087b78a28c4.K562.5EU.0.unlabeled.III;16_chr1:8861000-1	chr1	+	8861000	8878703	17704	430M1457N59M289N107M547N204M1192N197M796N223M615N135M737N66M2391N2M2D1M1D58M1380N85M2842N2M5I98M1D3M3664N120M	3.1505	32.8546	54.03	1.95435	34.129	73.4
dd240db3-4cfd-4f29-9a62-446ed77b5e59.K562.5EU.0.unlabeled.I;16_chr1:8861000	chr1	+	8861000	8878676	17677	430M1457N59M289N107M547N204M1192N1216M615N135M737N66M2391N2M2D1M1D58M1380N85M2842N2M5I102M3664N2I93M	2.2417	27.092	51.2975	1.89712	22.261	66
d4000b7b-54d9-4019-a236-4e2460f3fc09.K562.5EU.60.labeled.heat.IV;16_chr1:8861000	chr1	+	8861000	8878676	17677	430M1457N59M289N107M547N204M1192N197M796N223M615N135M737N66M3831N4M2D94M2837N98M3664N2I93M	1.24084	34.9011	51.985	0.769029	38.8778	74.68
0df68fd1-36e2-4385-b473-4bd644f47ce9.K562.5EU.60.labeled.I;16_chr1:8860000-1	chr1	+	8861000	8878703	17704	430M1457N59M289N107M547N204M1192N197M796N223M615N135M737N66M2391N2M2D1M1D58M1380N85M2842N2M5I102M3664N2I120M	24.0112	26.3685	80.745	18.8282	23.4206	78.74
10742049-9786-4cd2-960a-2140b6f157f7.K562.5EU.0.unlabeled.III;16_chr1:8861000-1	chr1	+	8861000	8878627	17628	430M1457N59M289N107M547N204M1186N203M796N223M615N135M737N66M2391N2M2D1M1D58M1380N85M2842N2M5I102M3664N2I44M	0.620347	36.6657	53.9575	0.607467	31.4818	73.08
10742049-9786-4cd2-960a-2140b6f157f7.K562.5EU.0.unlabeled.III;16_chr1:8861000	chr1	+	8861000	8878676	17677	430M1457N59M289N107M547N204M1186N203M796N223M615N135M737N66M2391N2M2D1M1D58M1380N85M2842N2M5I102M3664N2I93M	0.709472	47.431	23.265	0.51461	40.1503	77.66
f4a0c90f-6509-4b10-8b49-22525be83cc6.K562.5EU.0.unlabeled.III;16_chr1:8861000	chr1	+	8861000	8866318	5319	430M1457N59M289N858M1192N197M796N41M	0.419882	37.2576	-0.5	0.402359	26.3128	-1
57269bc7-ca04-4dad-876b-753a2044fab5.K562.5EU.0.unlabeled.II;16_chr1:8861000-1	chr1	+	8861000	8878627	17628	430M1457N59M289N107M547N204M1192N197M796N183M2D655N133M737N66M2391N2M2D1M1D58M1380N85M2842N2M5I102M3664N2I44M	1.22004	28.3874	74.3825	0.601986	35.392	103.83
0df68fd1-36e2-4385-b473-4bd644f47ce9.K562.5EU.60.labeled.I;16_chr1:8860000	chr1	+	8861000	8878676	17677	430M1457N59M289N107M547N204M1192N197M796N223M615N135M737N66M2391N2M2D1M1D58M1380N85M2842N2M5I102M3664N2I93M	13.2344	26.3465	71.09	10.9451	23.2961	97.93
8bcfc766-a22c-4ba2-b2a5-0087b78a28c4.K562.5EU.0.unlabeled.III;16_chr1:8861000	chr1	+	8861000	8878676	17677	430M1457N59M289N107M547N204M1192N197M796N223M615N135M737N66M2391N2M2D1M1D58M1380N85M2842N2M5I98M1D3M3664N93M	2.90588	31.6917	62.5525	2.18951	26.1076	85.57
51b7203a-480a-4a13-a18a-3bd635d066cd.K562.5EU.60.labeled.heat.III;16_chr1:8861000	chr1	+	8861000	8878676	17677	413M1809N1M2I4M3D2M3D107M547N204M1192N197M796N223M615N135M737N66M2391N2M2D1M1D58M1380N85M2842N2M5I102M3664N2I93M	0.238202	32.7368	-0.5	0.200662	35.392	-1
be25e931-efa6-41cc-9594-d38166b2ebb7.K562.5EU.60.labeled.heat.IV;16_chr1:8860000-1	chr1	+	8861000	8878627	17628	413M1464N2M2I5M3D59M289N107M547N204M1192N197M796N223M615N135M737N66M2391N2M2D1M1D58M1380N85M2842N2M5I102M3664N2I44M	0.0767152	160.698	28.635	0.369678	30.6383	22.54
e61c22dc-ff14-4693-85c9-cc79f954f7c4.K562.5EU.60.labeled.IV;16_chr1:8861000	chr1	+	8861000	8878676	17677	430M1457N59M289N107M547N204M1192N197M796N193M646N134M737N66M2391N2M2D1M1D58M1380N85M2842N2M5I102M3664N2I93M	1.02309	33.9811	43.77	0.456007	35.8307	70.755
72fe31e3-b4cb-48f7-8d33-d748955053c4.K562.5EU.0.unlabeled.II;16_chr1:8861000-2	chr1	+	8861000	8878676	17677	430M1457N59M289N107M547N204M1192N197M796N223M615N135M737N3997M2837N98M3664N2I93M	1.63984	29.3284	49.5725	1.41405	32.0706	97.4
f01d3564-c9a1-4b95-a94f-5deb7e62e9c6.K562.5EU.60.labeled.heat.V;16_chr1:8861000	chr1	+	8861000	8878676	17677	430M1457N59M289N107M547N204M1192N197M796N223M615N100M772N66M2391N2M2D1M1D58M1380N85M2842N2M5I102M3664N2I93M	0.722753	54.7527	46.1425	0.839588	34.6636	54.96
dad40d19-40ef-4b58-98b6-2ea7f126be57.K562.5EU.60.labeled.VI;16_chr1:8861000-1	chr1	+	8861000	8878627	17628	430M1457N59M289N107M547N204M1192N197M796N223M615N135M737N66M2391N2M2D1M1D1534M2837N98M3664N2I44M	1.2832	32.5914	62.72	1.20526	25.1615	82.845
4a058a1e-b8a9-4d17-b39c-6e54a6d8b0d6.K562.5EU.1440.labeled.II;16_chr1:8861000-1	chr1	+	8861000	8878703	17704	430M1457N59M289N107M547N204M1192N197M796N223M615N130M742N66M2391N2M2D1M1D58M1380N85M2842N2M5I102M3664N2I120M	1.80622	36.5963	88.255	2.14491	24.3176	75.5
ea6336fd-1c73-445d-946d-e41aad39e720.K562.5EU.60.labeled.VI;16_chr1:8861000	chr1	+	8861000	8878676	17677	430M1457N59M289N107M547N204M1192N197M796N973M737N66M2391N2M2D1M1D58M1380N96M2837N98M3664N2I93M	2.29843	31.7469	52.155	2.05406	24.7135	91.81
7565a06f-a0cf-4e31-90a4-c9cf0307bfa7.K562.5EU.60.labeled.heat.V;16_chr1:8861000	chr1	+	8861000	8878676	17677	430M1457N59M289N107M547N204M1192N197M796N194M1D1M1D2M12107N93M	0.508308	62.6087	26.775	0.806805	32.5052	42.905
a36d3925-dd79-4b28-ad90-c0f46d787675.K562.5EU.0.unlabeled.III;16_chr1:8861000	chr1	+	8861000	8874895	13896	430M1457N59M289N107M547N204M1186N203M796N973M737N66M2391N2M2D1M1D58M1380N96M2837N74M	0.512357	46.0728	75.24	0.312063	55.3575	29.14
4c29baae-29cb-4669-a11f-064a83f61d75.K562.5EU.60.labeled.IV;16_chr1:8861000	chr1	+	8861000	8878676	17677	430M1457N59M289N107M547N204M1192N197M796N223M615N130M742N66M2391N2M2D1M1D58M1380N85M2842N2M5I98M1D3M3664N93M	1.14935	35.2162	51.035	1.12256	31.5499	95.93
4a058a1e-b8a9-4d17-b39c-6e54a6d8b0d6.K562.5EU.1440.labeled.II;16_chr1:8861000	chr1	+	8861000	8878676	17677	430M1457N59M289N107M547N204M1192N197M796N223M615N130M742N66M2391N2M2D1M1D58M1380N85M2842N2M5I102M3664N2I93M	1.47857	34.5634	75.375	1.9775	19.18	78.82
11e9f6ee-9733-4af2-8fa4-4578baf1469e.K562.5EU.0.unlabeled.III;16_chr1:8861000	chr1	+	8861000	8878676	17677	430M1805N107M547N204M1192N197M796N223M615N135M737N66M2391N2M2D1M1D58M1380N85M2842N2M5I102M3664N2I93M	0.289101	54.7527	13.12	0.292311	33.9811	67.2
42c47d6d-8454-46a8-b118-4017b7f9ceb9.K562.5EU.1440.labeled.I;16_chr1:8861000	chr1	+	8861029	8878676	17648	401M1457N59M289N107M547N204M1192N197M796N223M615N135M737N66M2391N2M2D1M1D58M4313N98M3664N2I93M	0.0202733	110.437	NA	NA	NA	NA
6f67fe74-b49b-4256-87dd-db08fe0079d5.K562.5EU.60.labeled.IV;16_chr1:8861000	chr1	+	8861029	8868911	7883	401M1457N59M289N107M547N1593M796N223M615N1796M	NA	NA	NA	NA	NA	NA
4a058a1e-b8a9-4d17-b39c-6e54a6d8b0d6.K562.5EU.1440.labeled.II;16_chr1:8861000-3	chr1	+	8861029	8878703	17675	401M1457N59M289N107M547N204M1192N197M796N223M615N130M742N66M2391N2M2D1M1D58M1380N85M2842N2M5I102M3664N2I120M	NA	NA	NA	0.0924196	30.6383	NA
8bcfc766-a22c-4ba2-b2a5-0087b78a28c4.K562.5EU.0.unlabeled.III;16_chr1:8861000-2	chr1	+	8861029	8878676	17648	401M1457N59M289N107M547N204M1192N197M796N223M615N135M737N66M2391N2M2D1M1D58M1380N85M2842N2M5I98M1D3M3664N93M	0.0763576	46.8654	NA	NA	NA	NA
0df68fd1-36e2-4385-b473-4bd644f47ce9.K562.5EU.60.labeled.I;16_chr1:8860000-2	chr1	+	8861029	8878676	17648	401M1457N59M289N107M547N204M1192N197M796N223M615N135M737N66M2391N2M2D1M1D58M1380N85M2842N2M5I102M3664N2I93M	NA	NA	NA	0.61578	15.9333	NA
826debe3-e8e6-4683-96cf-d0d34ed91af2.K562.5EU.60.labeled.V;16_chr1:8861000-2	chr1	+	8861029	8879160	18132	1917M289N107M547N204M1192N197M796N223M615N135M737N66M2391N2M2D1M1D58M1380N85M2842N2M5I102M3664N2I577M	0.577733	43.2533	68.025	0.283338	45.4235	71.515
0df68fd1-36e2-4385-b473-4bd644f47ce9.K562.5EU.60.labeled.I;16_chr1:8860000-3	chr1	+	8861029	8878703	17675	401M1457N59M289N107M547N204M1192N197M796N223M615N135M737N66M2391N2M2D1M1D58M1380N85M2842N2M5I102M3664N2I120M	1.13338	13.5815	9.3325	0.802744	14.8302	NA
4a058a1e-b8a9-4d17-b39c-6e54a6d8b0d6.K562.5EU.1440.labeled.II;16_chr1:8861000-2	chr1	+	8861029	8878676	17648	401M1457N59M289N107M547N204M1192N197M796N223M615N130M742N66M2391N2M2D1M1D58M1380N85M2842N2M5I102M3664N2I93M	NA	NA	NA	NA	NA	NA
5bf2af7d-c917-4c4d-820e-bf44bef60a5d.K562.5EU.60.labeled.IV;16_chr1:8868000-1	chr1	+	8869956	8878676	8721	553M1380N96M2837N98M3664N2I93M	0.0231049	62.6087	NA	NA	NA	NA
4747d6a0-3d34-4f9c-8653-e85b8ed1b7e2.K562.5EU.60.labeled.heat.III;0_chr1:9266000	chr1	+	9266943	9271337	4395	4395M	0.0425688	86.2938	NA	0.0924196	62.6087	99.975
86e2e4e2-2249-4b20-8016-a9ba17b60b6e.K562.5EU.0.unlabeled.III;0_NM_032315-2	chr1	+	9539417	9582772	43356	331M13878N180M16452N101M2987N67M6541N281M2064N474M	0.0191788	160.698	26.18	NA	NA	95.03
760d9d89-86fb-48ba-bc7d-f24df44fe9d9.K562.5EU.60.labeled.IV;0_NM_032315	chr1	+	9539438	9585168	45731	310M13878N180M19540N67M6541N281M2064N2870M	0.115525	62.6087	56.36	0.164792	38.8778	NA
NM_032315_032315	chr1	+	9539477	9582772	43296	271M13878N180M13478N78M2896N101M2987N67M6541N281M2064N474M	1.25965	37.2576	99.08	0.657799	59.2428	114.745
76786ef4-873d-466c-9b0e-dc087a68eff0.K562.5EU.60.labeled.heat.IV;0_NM_032315	chr1	+	9539501	9582772	43272	247M13878N180M13478N78M5984N67M6541N281M2064N474M	0.152715	46.8654	53.5125	0.0383576	160.698	NA
bc4fd3c6-207d-44df-b1d6-3f5da1ec9206.K562.5EU.1440.labeled.II;0_NM_032315	chr1	+	9539501	9582772	43272	247M13878N180M13478N78M12592N281M2064N474M	0.0693147	62.6087	NA	0.0231049	62.6087	NA
25c0720b-a892-4898-ad22-55605f391779.K562.5EU.60.labeled.IV;0_NM_001130924	chr1	+	9596537	9604955	8419	517M1395N177M2479N350M614N2887M	0.130577	78.3609	117.275	0.146156	33.9811	173.08
e5040b80-edfd-4b1b-8296-bc192344f6e2.K562.5EU.0.unlabeled.I;16_chr1:9672000	chr1	+	9672405	9687551	15147	318M14615N214M	0.0202733	110.437	NA	0.0988514	50.8162	NA
1187fc46-7cd9-4b20-bbc4-5b86ad9727a5.K562.5EU.0.unlabeled.I;16_chr1:9677000	chr1	+	9680842	9681078	237	237M	0.0231049	62.6087	-0.5	0.0549306	38.8778	NA
8c38ed50-2340-4d8b-b8e2-1b520c5771e2.K562.5EU.60.labeled.heat.IV;16_chr1:9680000	chr1	+	9680847	9687551	6705	292M6199N214M	1.17864	28.7927	73.3475	1.25425	31.0505	97.69
0922d296-1ef3-400b-8f12-3b16458fcbd8.K562.5EU.60.labeled.I;0_NM_005026	chr1	+	9689558	9728922	39365	164M1745N105M18852N173M4944N229M79N230M361N180M339N150M428N90M1067N222M1005N97M94N131M368N51M83N165M217N122M195N144M173N100M114N179M90N113M171N79M518N168M676N124M183N146M382N133M1972N2014M	0.207944	62.6087	111.888	0.157152	69.3462	126.35
49f1113e-4773-4c30-94f7-8b2b6153a5d3.K562.5EU.60.labeled.IV;16_chr1:9729000	chr1	+	9729022	9823947	94926	1684M500N187M370N130M1504N149M425N172M805N222M290N3M2D151M269N156M5049N2D163M2627N124M389N248M7D5M4811N1I183M117N146M1559N205M3429N6M3D194M17962N127M50248N303M	0.218786	123.864	63.745	0.190301	88.9495	125.33
84b0ac30-b2eb-4bd7-8323-91770b4d5ff4.K562.5EU.60.labeled.heat.V;16_chr1:9848000-1	chr1	+	9848278	9910282	62005	2496M20410N89M688N1M3D123M5816N87M2D3M5713N29M26356N189M	0.433652	54.7527	42.575	0.329584	38.8778	83.8
c9ece4cc-cde0-4239-8d13-4cebc7ff6527.K562.5EU.60.labeled.heat.I;16_chr1:9848000-1	chr1	+	9850115	9910282	60168	659M20410N89M688N1M3D123M5816N85M32105N189M	0.312063	55.3575	43.795	NA	NA	39.145
0a433809-fcdc-4e5b-8432-859a13ea8386.K562.5EU.60.labeled.heat.I;16_chr1:9922000	chr1	+	9922161	9943315	21155	195M9526N1M4D1M2D83M830N98M4D1M1859N97M1D2M630N135M6D1M885N110M5996N155M466N67M	0.0425688	86.2938	NA	NA	NA	NA
4e13cdc0-27ce-46d1-aa41-49800499cff9.K562.5EU.60.labeled.heat.V;16_chr1:9926000	chr1	+	9926394	9927984	1591	1591M	0.164792	38.8778	65.475	0.225612	28.1921	87.16
e8433fc3-956c-4637-b322-d9725c144126.K562.5EU.60.labeled.heat.III;16_chr1:9926000	chr1	+	9926401	9943315	16915	4056M4304N101M1D2M630N135M6D1M885N110M5996N155M466N67M	0.117765	135.208	130.213	0.157152	69.3462	108.23
4e8457ad-584b-48bb-9dd2-a747a2038bd0.K562.5EU.60.labeled.IV;16_chr1:9929000	chr1	+	9929279	9943341	14063	1050M1562N82M830N98M4D1M1859N97M1D2M630N135M6D1M885N110M5996N155M466N93M	0.0763576	46.8654	25.165	NA	NA	NA
8477af9c-9cff-4b32-93f9-15d8699774dc.K562.5EU.60.labeled.heat.III;16_chr1:9926000-1	chr1	+	9930247	9943341	13095	212M1D3M1432N78M830N98M4D1M1859N97M1D2M630N135M6D1M885N110M5996N155M466N93M	0.494376	38.8778	70.7075	0.283338	45.4235	106.04
104fd1ac-8c96-456a-bb03-168379e11072.K562.5EU.60.labeled.I;16_chr1:9926000	chr1	+	9930247	9943372	13126	212M1D3M1432N78M830N98M4D1M1859N97M1D2M630N135M6D1M885N110M5996N158M1I1M567N19M	0.40482	40.4887	77.24	0.346736	34.8054	83.085
0ad3d3fd-a05b-4454-bd84-503fd4448472.K562.5EU.60.labeled.IV;0_chr1:9943000	chr1	+	9943443	9949794	6352	492M3278N295M2130N157M	0.0202733	110.437	NA	NA	NA	NA
6a24f196-c088-4cd6-95eb-d9e565e61bf1.K562.5EU.0.unlabeled.III;0_chr1:9943000	chr1	+	9943485	9945288	1804	1804M	0.0231049	62.6087	90.535	NA	NA	NA
b1ed5c78-84ff-401d-a077-c20e2c9d1ab0.K562.5EU.60.labeled.IV;0_NM_001297779	chr1	+	9943489	9981766	38278	27M3697N295M23245N41M1224N171M3403N184M5255N140M85N511M	0.0594458	126.875	18.915	0.0462098	62.6087	74.89
NM_006048_001105562-3	chr1	+	10032972	10181241	148270	723M38333N187M23246N136M5511N88M1752N145M2423N229M11714N142M1912N101M2348N115M4717N84M2514N57M1051N117M98N99M1555N114M2505N199M1880N139M7734N100M1923N128M2093N99M2043N236M6794N127M2659N145M6849N135M2867N192M7314N175M4D593N147M332N1347M	0.387903	65.3815	140.678	0.404074	47.8549	146.84
c112df11-dfd4-483a-990a-36adb2d607f8.K562.5EU.0.unlabeled.II;0_NM_001105562	chr1	+	10033660	10181241	147582	35M38333N187M23246N136M5511N88M1752N145M2423N229M11714N142M1912N101M2348N115M4717N84M2514N57M1051N117M98N99M1555N114M2505N199M1880N139M7734N100M1923N128M2093N99M2043N236M6794N127M2659N145M6849N135M2024N1035M7314N175M4D593N147M332N1347M	0.238353	79.7997	91.36	0.261554	43.6881	144.135
2dc76b96-62ab-4052-943f-39bd47efc34a.K562.5EU.60.labeled.heat.III;0_NM_001105562	chr1	+	10072026	10145188	73163	189M23246N136M2995N77M2439N88M1752N145M2423N229M11714N142M1912N101M2348N115M4717N84M2514N57M1051N117M98N99M1555N114M2505N199M1880N139M7734N249M	0.0231049	62.6087	NA	0.0549306	38.8778	29.16
ff65e7cc-baa9-499d-9d60-15b51788a831.K562.5EU.0.unlabeled.I;0_NM_015074	chr1	+	10210550	10381599	171050	329M21371N185M23812N77M2169N180M3232N66M5409N179M593N112M3238N78M661N66M3121N76M817N79M1586N143M4271N134M8548N80M885N76M2963N80M494N107M815N84M231N181M96N73M22796N94M1572N149M2026N179M695N138M9624N119M2018N86M331N130M167N163M2235N91M2190N119M1063N56M2557N109M1807N67M821N85M3897N106M8192N115M648N134M1457N62M1755N146M163N240M2818N72M2602N122M3053N150M388N193M208N119M1171N5055M	0.0171213	1651.26	124.07	0.0748564	200.421	176.62
NM_183416_015074	chr1	+	10210638	10308578	97941	241M21371N185M23812N77M2169N180M3232N66M5409N179M593N112M3238N78M661N66M3121N76M817N79M1586N143M4271N134M8548N80M885N76M2963N80M494N107M815N84M231N181M96N73M5916N5416M	0.0371906	214.086	119.925	0.0185953	214.086	73.45
1cad417c-41d8-4e11-93c6-f7fc9b9a41a7.K562.5EU.60.labeled.heat.IV;0_chr1:10304000	chr1	+	10306405	10308594	2190	2190M	0.0182322	271.042	NA	NA	NA	106.5
NM_002631_002631-2	chr1	+	10399043	10420135	21093	83M503N76M688N180M2498N66M1024N119M3791N70M3277N135M1509N190M3735N131M258N134M1316N100M491N123M90N506M	0.529657	37.5996	84.91	0.543255	28.6282	94.445
NM_002631_002631-3	chr1	+	10399043	10420507	21465	83M503N76M688N180M2498N66M1024N119M3791N70M3277N135M1509N190M3735N131M258N134M1316N100M491N123M90N878M	3.15561	36.0241	96.59	1.8972	42.8907	76.295
697f6d45-d55e-40f6-831e-6f2a3f8b1122.K562.5EU.60.labeled.heat.I;0_NM_002631	chr1	+	10399078	10420135	21058	48M503N76M688N180M3588N116M3794N70M3277N135M1509N190M3735N131M258N134M1316N100M491N123M90N506M	0.18546	42.3201	48.45	0.0924196	62.6087	128.12
0bb52631-505d-4e92-826b-85ec77a9f7ac.K562.5EU.60.labeled.heat.IV;0_NM_002631	chr1	+	10399078	10420135	21058	627M671N197M2498N66M1024N119M3791N70M3277N135M1509N190M3735N131M258N134M1316N100M491N123M90N506M	0.152715	46.8654	66.92	0.109861	38.8778	102.24
bb27d0b2-a033-4806-87d9-44176fae3d69.K562.5EU.60.labeled.I;0_NM_002631	chr1	+	10399078	10420135	21058	48M503N76M688N180M2498N66M1024N116M3794N70M3277N135M1509N190M3735N131M258N134M1316N100M491N123M90N506M	0.167524	55.8758	51.7525	0.0191788	160.698	84.31
f9bc3d7a-8540-4813-adf5-369d98fd102b.K562.5EU.60.labeled.heat.IV;0_NM_002631	chr1	+	10399078	10420135	21058	48M503N76M671N197M2498N66M1024N119M3791N70M3277N135M1509N190M3735N131M258N134M1316N100M491N123M90N506M	0.101366	110.437	43.4325	0.111125	72.0459	66.475
b802137a-f0b5-4138-992b-9ad90cbf4232.K562.5EU.60.labeled.IV;0_NM_002631	chr1	+	10399078	10420507	21430	48M516N63M688N180M2498N66M1024N119M3791N70M3277N135M1509N190M3735N131M258N134M1316N100M491N123M90N878M	1.4685	39.7738	86.6725	0.578202	54.7527	84.35
7627fb94-1f85-42f4-9b39-4bacbf0b5f94.K562.5EU.1440.labeled.II;0_NM_002631	chr1	+	10399078	10420135	21058	48M503N73M691N180M2498N66M1024N119M3791N70M3277N135M1509N190M3735N131M258N134M1316N100M491N123M90N506M	0.107799	81.5283	-0.5	0.329584	19.18	44.83
NM_002631_002631-1	chr1	+	10399078	10420507	21430	48M503N76M688N180M2498N66M1024N119M3791N70M3277N135M1509N190M3735N131M258N134M1316N100M491N123M90N878M	2.04618	33.9811	83.0025	1.0448	57.2535	65.735
4a60c56c-3722-4bf2-b955-9bced2818497.K562.5EU.60.labeled.II;0_NM_002631	chr1	+	10399078	10420135	21058	48M503N76M688N180M2498N66M1024N119M3791N70M3277N135M1509N190M3735N131M258N134M1327N89M491N123M90N506M	NA	NA	NA	NA	NA	NA
32d47b9c-163a-464a-938b-ec96a21cb729.K562.5EU.60.labeled.IV;0_NM_002631	chr1	+	10404197	10420135	15939	80M3794N70M3277N135M1509N4448M1316N100M491N123M90N506M	0.164792	38.8778	126.522	0.227023	21.6944	95.72
336c043c-33ec-4970-8002-a1583ba2a1a5.K562.5EU.60.labeled.heat.II;0_NM_002631	chr1	+	10417615	10420064	2450	1311M491N648M	NA	NA	NA	NA	NA	NA
fbb4b3e4-b5a8-45f8-a810-e03859aa5b3a.K562.5EU.60.labeled.IV;0_chr1:10419000	chr1	+	10419703	10420143	441	441M	0.0425688	86.2938	17.0075	0.0405465	110.437	39.095
4e706ffd-759b-4ae3-a6b4-0423b4a93f5e.K562.5EU.60.labeled.IV;16_chr1:10429000	chr1	+	10429895	10430674	780	780M	0.0549306	38.8778	NA	NA	NA	NA
NM_199006_036462	chr1	+	10430455	10451661	21207	114M3273N124M691N34M16686N285M	NA	NA	NA	0.0549306	38.8778	NA
NM_001270517_036462	chr1	+	10430455	10451661	21207	114M3273N124M691N34M5656N67M1851N177M8935N285M	0.0608198	110.437	36.82	0.0231049	62.6087	NA
21f047dc-9915-4caa-bddb-566fa159ed33.K562.5EU.1440.labeled.II;0_NR_037187	chr1	+	10430455	10451661	21207	114M9778N67M10963N285M	0.0549306	38.8778	66.16	NA	NA	NA
NR_036462_036462-3	chr1	+	10430764	10442795	12032	638M2440N124M691N34M5656N67M1851N531M	0.195866	78.3609	59.55	0.141913	110.437	NA
fdf11c87-a31f-4666-9902-1aac9dc041e1.K562.5EU.60.labeled.heat.I;16_chr1:10442000	chr1	+	10442271	10442811	541	541M	NA	NA	NA	0.0191788	160.698	57.94
b4419850-21ad-4674-af14-fc7bcf036784.K562.5EU.60.labeled.I;16_chr1:10449000	chr1	+	10449958	10453995	4038	4038M	0.0392551	135.208	161.165	NA	NA	NA
3950058a-3203-4859-ab6b-60cf9832ec15.K562.5EU.0.unlabeled.III;16_chr1:10456000	chr1	+	10456535	10457360	826	826M	0.387903	65.3815	37.015	0.404099	57.0644	131.195
fd6b8c28-62f9-45b0-a2ec-1147954b3d3c.K562.5EU.60.labeled.heat.IV;16_chr1:10456000-3	chr1	+	10461227	10472530	11304	476M1355N152M221N190M3569N143M1844N162M2984N208M	0.127706	86.2938	57.985	0.51075	36.1713	121.21
edba7b5f-3fd7-408d-a29f-9d2cfe700dfb.K562.5EU.60.labeled.heat.IV;16_chr1:10461000-2	chr1	+	10462463	10472510	10048	747M221N190M3569N143M1844N162M2984N188M	0.235462	84.1254	16.92	0.212844	86.2938	74.565
edba7b5f-3fd7-408d-a29f-9d2cfe700dfb.K562.5EU.60.labeled.heat.IV;16_chr1:10461000	chr1	+	10462908	10472530	9623	302M221N190M3569N143M1844N162M2984N208M	0.125334	94.2796	89.7225	0.13412	26.3128	16.14
1694fce9-aeb2-4b2c-80e7-819d6f40b162.K562.5EU.1440.labeled.II;0_NM_004565-2	chr1	+	10474859	10519983	45125	144M20271N48M24481N181M	0.0231049	62.6087	9.425	0.0202733	110.437	NA
1694fce9-aeb2-4b2c-80e7-819d6f40b162.K562.5EU.1440.labeled.II;0_NM_004565-1	chr1	+	10474963	10520006	45044	40M20271N48M24481N204M	NA	NA	NA	0.0202733	110.437	NA
NM_004565_004565-3	chr1	+	10474963	10630752	155790	40M20271N48M40891N85M62940N129M18965N86M4601N103M1218N98M2834N92M2167N1222M	0.69196	50.8162	92.4475	0.570444	50.3019	91.66
5c90b226-af07-4d9d-b474-517a35bf51a2.K562.5EU.60.labeled.V;0_NM_007375	chr1	+	11012663	11030529	17867	81M972N250M2878N164M1725N141M1555N171M1524N127M942N137M734N272M774N99M342N115M4021N95M4D393N351M	0.0191788	160.698	NA	NA	NA	NA
9e7b24a7-2336-4365-ac96-4e259c0e04ee.K562.5EU.60.labeled.IV;0_NM_007375	chr1	+	11012663	11025477	12815	81M972N250M2878N164M1725N141M1555N171M1524N1206M734N272M774N368M	0.0175601	543.791	94.335	NA	NA	NA
f053fcc2-8531-4508-b763-fdbf129dcb0a.K562.5EU.60.labeled.heat.III;0_NM_007375	chr1	+	11012663	11025477	12815	81M972N250M2878N164M1725N141M1555N171M1524N2212M774N368M	0.389537	142.776	120.965	0.301122	116.977	184.295
967fdedc-902e-4bf6-87b0-bd91171a4ec3.K562.5EU.0.unlabeled.I;0_NM_007375	chr1	+	11012663	11025477	12815	81M972N250M2878N164M1725N141M1555N171M1524N1206M972N34M774N368M	0.0202733	110.437	83.2225	NA	NA	NA
6d2b599c-1201-4b11-97d9-63a1b77ac074.K562.5EU.1440.labeled.II;0_NM_007375	chr1	+	11012663	11021994	9332	81M972N250M2878N164M3421N1566M	0.0828639	98.2946	NA	0.0392551	135.208	192.76
a13d4ea8-a92f-420a-b195-b52c89d72c5f.K562.5EU.60.labeled.I;0_NM_007375	chr1	+	11012663	11024033	11371	81M972N250M2878N164M1725N141M1560N166M1524N1910M	0.0760081	173.734	113.302	0.130777	43.6881	112.44
bdb719a8-30de-4567-a976-9273c93310f3.K562.5EU.60.labeled.I;0_NM_007375	chr1	+	11012689	11024044	11356	55M972N250M4767N141M1555N171M1524N1921M	0.180957	115.884	135.635	0.161734	62.6087	246.665
33ce5074-aff6-4199-93a9-e2d9c036f8fa.K562.5EU.60.labeled.heat.I;0_NM_007375-1	chr1	+	11012689	11025477	12789	55M972N250M2157N132M589N164M1725N141M1555N171M1524N3354M	0.208226	179.725	88.29	0.198557	125.218	200.53
67046a40-a2f9-4321-b5bb-976d82a4edbc.K562.5EU.60.labeled.heat.I;0_NM_007375-1	chr1	+	11012689	11024044	11356	55M972N250M2878N164M1725N141M1555N171M1524N127M1012N67M537N178M	NA	NA	NA	NA	NA	NA
dd010870-9f73-4b0e-9e4e-495b00b4f39f.K562.5EU.60.labeled.heat.I;0_NM_007375	chr1	+	11013775	11024044	10270	191M2878N164M1725N141M1555N171M1524N54M1218N649M	0.0191788	160.698	NA	0.0202733	110.437	NA
0608d7e2-bb87-4edb-8156-68a38ac7c959.K562.5EU.0.unlabeled.III;0_NM_007375	chr1	+	11016963	11030529	13567	45M1725N141M1555N171M1524N1206M734N272M774N99M4478N843M	0.0185953	214.086	108.5	NA	NA	NA
8e9a33ba-88b1-4ce0-9bb9-cdd535dc5594.K562.5EU.0.unlabeled.II;0_chr1:11027000	chr1	+	11029219	11030529	1311	1311M	0.0583832	143.621	106.185	NA	NA	NA
af5490ee-db60-494b-bda5-9437b676e351.K562.5EU.60.labeled.heat.V;16_chr1:11051000	chr1	+	11051439	11054291	2853	2853M	NA	NA	NA	0.0763576	46.8654	158.46
247113c0-c884-4c9e-8f33-c7646ab3380b.K562.5EU.0.unlabeled.II;16_chr1:11054000	chr1	+	11054596	11060032	5437	288M69N1M7D124M696N145M84N84M509N154M2042N92M332N132M2D429N247M	1.57584	49.1253	68.3975	1.64181	36.359	60.48
445f4930-8d9e-4c4a-a2ad-e0685bafa4ef.K562.5EU.0.unlabeled.II;16_chr1:11054000	chr1	+	11054596	11060009	5414	288M69N1M7D1133M509N154M2042N92M332N132M2D429N224M	0.40482	40.4887	126.5	0.277259	62.6087	95.33
ec892523-6fc1-4578-b61c-3b8f1a57e6da.K562.5EU.60.labeled.heat.I;16_chr1:11054000	chr1	+	11054596	11060024	5429	288M69N1M7D446M373N146M84N84M509N154M2042N92M332N132M2D429N239M	0.0652885	78.3609	34.1075	0.109861	38.8778	NA
af0f332b-a333-4f73-a7b8-e247371001f3.K562.5EU.60.labeled.IV;16_chr1:11054000	chr1	+	11054596	11060032	5437	288M69N1M7D965M84N84M509N154M2042N92M332N132M2D429N247M	1.43681	53.0192	69.1675	1.2648	42.8907	77.96
9282e48e-a03c-4b6e-87c3-f805ad9edc48.K562.5EU.60.labeled.IV;16_chr1:11054000	chr1	+	11054596	11060059	5464	288M69N1M7D124M696N155M74N84M509N154M2042N92M332N132M2D429N274M	0.173072	80.3397	35.025	0.111125	72.0459	124.52
05c3979e-aa64-489e-9ac2-24dca3aa1175.K562.5EU.60.labeled.IV;16_chr1:11054000	chr1	+	11054596	11060059	5464	489M696N145M84N84M509N154M2042N92M332N132M2D429N274M	1.56711	54.6317	61.385	1.3729	44.7693	87.215
bfd18d19-3c54-45ab-bcb5-3d76428e0f6b.K562.5EU.60.labeled.VI;16_chr1:11054000	chr1	+	11054596	11060032	5437	288M69N1M7D119M918N4D2M1D3M3D83M509N154M2042N92M332N132M2D429N247M	0.0924196	62.6087	-0.5	0.146156	33.9811	NA
247113c0-c884-4c9e-8f33-c7646ab3380b.K562.5EU.0.unlabeled.II;16_chr1:11054000-1	chr1	+	11054596	11059966	5371	288M69N1M7D124M696N145M84N84M509N154M2042N92M332N132M2D429N181M	0.706983	52.8536	27.0225	1.00456	29.5753	93.37
a3674135-ca80-4941-8878-dc9639a91906.K562.5EU.60.labeled.heat.I;16_chr1:11054000	chr1	+	11054596	11056670	2075	1330M84N84M509N68M	0.0392551	135.208	5.945	0.0924196	30.6383	NA
ebc9d26a-0f90-4db1-b046-5ef6b17b2ce1.K562.5EU.1440.labeled.II;16_chr1:11054000	chr1	+	11054679	11060024	5346	205M69N1M7D124M696N313M509N154M2042N92M332N132M2D429N239M	NA	NA	NA	0.0231049	62.6087	NA
c2b322fe-b4c7-425e-9887-bf1fe167d727.K562.5EU.60.labeled.heat.I;0_chr1:11060000	chr1	+	11063595	11064663	1069	1069M	0.0462098	62.6087	217.98	0.0231049	62.6087	NA
a2bd00ab-d35c-419c-9e39-636119d33fea.K562.5EU.1440.labeled.II;16_chr1:11066000	chr1	+	11066620	11072171	5552	132M6D1253N72M555N2M5D63M4D2M848N262M2D1M1075N72M1113N85M	0.0231049	62.6087	NA	0.0924196	30.6383	NA
6826ccb0-a1e4-4072-b854-16f1372e4cc3.K562.5EU.0.unlabeled.II;16_chr1:11066000-2	chr1	+	11066620	11099833	33214	132M6D1253N72M555N2M5D63M4D2M848N170M1D1168N73M1113N85M1762N75M222N95M2515N107M416N82M1D3M156N46M2059N114M2D2M4D670N47M214N151M5D164N155M1449N188M4569N144M207N2M1D106M210N3M1D3M1D68M2351N1M1I4M5D117M345N165M313N96M4157N9M3D125M2131N7D139M1564N111M	0.964174	30.0909	169.24	0.439445	38.8778	120.07
7ab1d02b-4eee-42cf-bc67-92c9606c5915.K562.5EU.60.labeled.III;16_chr1:11066000-2	chr1	+	11066620	11099833	33214	132M6D1253N72M555N2M5D63M4D2M848N170M1D1168N89M1D1M1097N83M1762N75M222N95M2515N107M416N82M1D3M156N46M2059N114M2D2M4D670N47M214N151M5D164N155M1449N188M4569N144M207N2M1D106M210N3M1D3M1D68M2351N1M1I4M5D117M345N165M313N96M4157N9M3D125M2131N7D139M1564N111M	0.0652885	78.3609	16.18	0.164792	38.8778	85.19
e0bb790f-9a06-42ef-9b3f-1fd41bca6ae0.K562.5EU.60.labeled.heat.III;16_chr1:11066000	chr1	+	11066641	11082750	16110	111M6D1253N72M555N2M5D63M4D2M848N170M1D1168N73M1113N85M1762N75M222N95M2515N811M2059N114M2D2M4D670N47M214N151M5D164N155M1449N63M	0.164792	38.8778	59.09	0.0392551	135.208	159.915
6826ccb0-a1e4-4072-b854-16f1372e4cc3.K562.5EU.0.unlabeled.II;16_chr1:11066000-1	chr1	+	11066641	11099856	33216	111M6D1253N72M555N2M5D63M4D2M848N170M1D1168N73M1113N85M1762N75M222N95M2515N107M416N82M1D3M156N46M2059N114M2D2M4D670N47M214N151M5D164N155M1449N188M4569N144M207N2M1D106M210N3M1D3M1D68M2351N1M1I4M5D117M345N165M313N96M4157N9M3D125M2131N7D139M1564N134M	0.462098	30.6383	103.415	0.274653	38.8778	66.935
715b6514-a368-4761-b416-5b3a399880a4.K562.5EU.1440.labeled.II;16_chr1:11066000	chr1	+	11066654	11072171	5518	98M6D1253N697M4D2M848N170M1D1168N73M1113N85M	NA	NA	NA	NA	NA	NA
ec4be9db-96be-4981-a272-8fd77f4692a2.K562.5EU.0.unlabeled.I;16_chr1:11106000	chr1	+	11106532	11210890	104359	970M2D2M678N104M1D2M1002N78M278N81M3122N66M1400N131M359N78M508N75M1535N80M4008N277M610N151M1I1M2372N132M1D1987N176M213N132M479N503M327N103M305N3I96M786N98M693N3I246M1D2301N116M1153N118M4833N4D131M99N2I126M7D3M2D4980N101M212N79M1630N114M3334N98M6921N2M4D145M10151N1I73M31740N145M137N163M4857N146M4608N139M1356N1I1M1I2M1D78M	0.687107	42.5836	99.58	0.741841	42.3201	123.595
NM_013319_013319-1	chr1	+	11273219	11288430	15212	842M11583N2787M	0.318635	65.9758	92.55	0.228379	97.198	106.025
cd89f577-f7d6-4311-beb5-f8e01989361b.K562.5EU.0.unlabeled.III;0_chr1:11297000	chr1	+	11297296	11299580	2285	2285M	NA	NA	17.25	NA	NA	NA
bdd06ef1-e7b1-4d25-9065-86d47ec26307.K562.5EU.60.labeled.I;0_chr1:11395000-2	chr1	+	11395119	11398212	3094	147M2740N207M	0.0371906	214.086	60.375	0.0231049	62.6087	NA
NM_183413_130909-1	chr1	+	11654880	11662292	7413	73M853N295M2166N98M371N136M2258N1163M	0.0988514	50.8162	NA	0.274653	38.8778	142.48
8424b919-f98b-4fea-87d4-ac4ed8c3a2fd.K562.5EU.60.labeled.V;0_chr1:11662000	chr1	+	11662289	11663310	1022	763M90N169M	0.0185953	214.086	NA	NA	NA	294.96
NM_018438_018438-1	chr1	+	11664147	11674349	10203	109M4400N289M2321N127M535N96M1253N136M202N735M	0.96896	38.1847	85.02	0.851376	41.8917	77.39
e753df04-49cd-4887-96fa-353c432cdfe8.K562.5EU.60.labeled.VI;0_NM_018438	chr1	+	11664266	11674349	10084	158M4232N289M2321N127M535N96M1253N136M202N735M	0.35967	45.7327	45.26	0.15343	76.1027	59
8b9d457b-272d-42c8-9e3b-bccce54235cc.K562.5EU.60.labeled.I;16_chr1:11674000-1	chr1	+	11674481	11681166	6686	336M265N92M483N68M312N1D5M1D99M2D2M705N97M594N72M2738N119M90N48M426N3D128M	0.310174	36.6657	110.427	0.359437	27.5138	65.52
61f52163-aafd-43b8-9054-f34660112015.K562.5EU.60.labeled.I;16_chr1:11674000	chr1	+	11674481	11681096	6616	324M272N2M1I95M483N68M312N1D5M1D99M2D2M705N97M594N72M2738N119M90N49M7D418N61M	0.13412	26.3128	40.105	NA	NA	NA
1c077d28-f283-4862-b282-6403ef8fc7b0.K562.5EU.60.labeled.III;16_chr1:11674000	chr1	+	11674481	11681522	7042	336M265N92M483N486M2D2M705N97M594N72M2738N119M90N961M	1.73287	36.082	148.298	2.02779	22.5668	151.2
3b5ba52e-0460-4012-b85f-0fa4f8713be0.K562.5EU.60.labeled.heat.V;16_chr1:11674000-1	chr1	+	11674481	11681126	6646	336M265N92M483N68M312N1D5M1D99M2D2M666N136M594N72M2738N119M90N49M7D418N91M	1.47441	24.382	108.23	1.07743	34.2489	146.52
16b257b6-4f25-4a46-9c1f-2522e500e747.K562.5EU.60.labeled.V;16_chr1:11673000-1	chr1	+	11674481	11681096	6616	336M265N92M483N68M312N1D5M1D99M2D2M705N97M594N72M2738N119M90N49M7D418N61M	0.543255	28.6282	115.062	0.594632	29.7438	101.62
4956237b-527c-4b3e-b972-8b87b8aeb933.K562.5EU.60.labeled.VI;16_chr1:11674000	chr1	+	11674481	11681126	6646	336M265N92M483N68M312N1D5M1D99M2D2M705N97M594N72M2738N258M7D418N91M	0.85912	38.0951	140.68	0.953119	28.9322	92.335
16b257b6-4f25-4a46-9c1f-2522e500e747.K562.5EU.60.labeled.V;16_chr1:11673000	chr1	+	11674481	11681126	6646	336M265N92M483N68M312N1D5M1D99M2D2M705N97M594N72M2738N119M90N49M7D418N91M	1.62115	27.8943	60.72	1.61258	23.5914	83.36
cbeae6c7-b864-4615-8235-0af11be5276a.K562.5EU.60.labeled.heat.I;16_chr1:11674000-1	chr1	+	11674481	11681166	6686	336M265N92M483N68M312N1D5M1D90M709N3D103M594N72M2738N119M90N49M7D418N131M	0.251403	48.448	89.235	0.130577	78.3609	182.84
NM_001040194_001040194-1	chr1	+	11736109	11750770	14662	127M9567N35M1602N106M869N175M1487N694M	0.410714	54.2901	NA	0.310174	36.6657	NA
NM_001040197_001040196	chr1	+	11736109	11750770	14662	127M9567N35M289N97M1216N106M869N196M1466N694M	0.462098	62.6087	86.075	0.433652	54.7527	141.585
NM_020350_001040194-1	chr1	+	11736109	11752084	15976	127M9567N35M1602N106M869N196M1466N2008M	0.859007	51.8295	56.2925	0.71934	45.7327	89.91
NM_001040196_001040194	chr1	+	11736137	11750770	14634	99M9567N35M289N97M1216N106M869N175M1487N694M	0.165728	98.2946	75.16	0.240245	41.5581	92.16
8d689937-976a-4095-8bd6-d46602734b2b.K562.5EU.60.labeled.VI;16_chr1:11785000	chr1	+	11785732	11786595	864	864M	0.0594458	126.875	51.44	NA	NA	-1
05df08b8-c851-4c35-95f1-4daae8268763.K562.5EU.60.labeled.heat.V;16_chr1:11785000	chr1	+	11785750	11805957	20208	4969M490N117M951N105M1527N176M263N5D187M6D1M2D1M182N136M234N249M857N187M3848N80M838N241M1481N251M1D2M1D1M2756N63M	0.403124	87.551	106.22	0.337345	68.8966	158.56
NM_001286_046428	chr1	+	11806257	11843136	36880	93M781N60M8655N66M703N66M2807N67M3140N107M905N127M652N68M1602N59M874N133M884N114M238N167M571N127M4192N124M238N154M205N160M88N107M1376N187M845N158M186N157M835N108M92N126M1482N2994M	0.0999183	120.264	132.303	0.0425688	86.2938	149.08
b7a7c934-6263-492a-95a8-a71e0ca2fec9.K562.5EU.60.labeled.IV;0_chr1:11908000	chr1	+	11908168	11908586	419	419M	0.0924196	30.6383	37.47	NA	NA	NA
677171b5-aa4b-4612-bf36-d57877fe9f83.K562.5EU.60.labeled.IV;16_chr1:11919000-2	chr1	+	11919594	11925692	6099	3891M1713N4M2D489M	0.207944	62.6087	26.265	0.0828639	98.2946	169.725
6f0397dd-26ac-4ece-bc81-0e3e6a191af5.K562.5EU.60.labeled.heat.I;16_chr1:11919000-3	chr1	+	11919594	11923492	3899	741M2303N855M	0.0371906	214.086	13.81	0.0851376	86.2938	146.63
d3c36eec-516b-49ff-b88c-afd16bb494d6.K562.5EU.60.labeled.IV;16_chr1:11919000-3	chr1	+	11919630	11926468	6839	705M2303N847M1713N4M2D1265M	0.107799	81.5283	174.94	0.274653	38.8778	145.83
49b99b54-78fb-4990-bdfe-2f19ed028369.K562.5EU.0.unlabeled.II;16_chr1:11920000	chr1	+	11920068	11926413	6346	267M2303N480M4D71N292M1713N4M2D1210M	0.0549306	38.8778	NA	NA	NA	NA
abf67acb-b9c6-4702-b93d-e7aa3ba63c45.K562.5EU.0.unlabeled.III;16_chr1:11920000	chr1	+	11920068	11926413	6346	267M2307N843M1713N4M2D1210M	0.130777	43.6881	36.37	0.0202733	110.437	NA
677171b5-aa4b-4612-bf36-d57877fe9f83.K562.5EU.60.labeled.IV;16_chr1:11919000	chr1	+	11920068	11926413	6346	3417M1713N4M2D1210M	0.130777	43.6881	NA	0.146156	33.9811	NA
NM_000302_001316320	chr1	+	11934740	11975540	40801	116M13120N92M1705N134M450N164M2102N113M2094N64M2023N98M827N102M572N132M1998N122M2764N105M538N126M343N142M694N114M657N66M670N105M3578N147M2055N126M1655N888M	1.0158	41.4176	98.8875	0.700375	49.1253	109.63
NM_014874_001127660	chr1	+	11980458	12013512	33055	27M1485N145M7050N179M3211N136M3465N163M978N125M1348N109M109N108M2305N154M214N68M145N122M1888N127M390N105M211N103M783N221M606N156M359N197M2342N135M1769N2017M	0.408682	143.621	81.405	0.368232	105.022	95.46
7b6e28df-6223-4ecf-909b-c2f6f82b4fee.K562.5EU.60.labeled.I;0_NM_021933-1	chr1	+	12019489	12032035	12547	64M2542N348M390N85M6115N109M81N59M483N130M133N97M1141N138M318N314M	0.26824	26.3128	NA	0.292311	33.9811	76.54
NM_021933_021933-2	chr1	+	12019489	12032035	12547	64M2092N196M254N348M390N85M6115N109M81N59M483N130M133N97M1141N138M318N314M	0.30582	58.9839	37.995	0.351982	59.4672	105.515
6f8a272a-e7a4-4f84-8c97-170f64d18aea.K562.5EU.0.unlabeled.II;0_NM_021933-1	chr1	+	12019489	12032035	12547	64M2092N196M254N348M390N85M6115N109M81N902M1141N138M318N314M	0.722917	49.592	53.51	0.839279	43.3892	183.18
1b95dbcb-7216-4bd4-a83a-cb27b90fc6dd.K562.5EU.0.unlabeled.I;0_NM_021933	chr1	+	12019516	12032035	12520	37M2092N196M254N348M390N85M6115N109M81N672M133N97M1141N138M318N314M	0.190535	56.7178	65.085	0.319282	51.7256	64.62
NM_001243_001281430-1	chr1	+	12063277	12144204	80928	385M20802N88M12549N117M7161N153M5034N91M384N164M1693N117M3562N153M7554N94M337N113M2123N102M130N54M9351N26M2615N208M3850N1918M	0.220448	52.1296	138.577	0.218709	76.7798	85.965
NM_001066_001066	chr1	+	12166975	12209227	42253	195M21626N100M2061N129M688N150M507N94M338N236M856N78M551N35M7348N205M4568N2488M	0.434089	65.0895	77.9525	0.35967	45.7327	103.06
d8c45a0a-cdd1-44e5-84e2-94a2f7b79a14.K562.5EU.60.labeled.IV;0_chr1:12202000	chr1	+	12202100	12203710	1611	72M335N1204M	0.0231049	62.6087	NA	NA	NA	NA
99147fc0-d73f-4873-ae3d-9c2d88fbe02d.K562.5EU.60.labeled.heat.III;0_NM_018156	chr1	+	12496553	12507622	11070	656M291N132M9221N770M	NA	NA	NA	0.0202733	110.437	NA
a0719656-dd79-4b6b-86fb-8765c74e92ff.K562.5EU.60.labeled.heat.I;0_NM_018156	chr1	+	12496791	12512032	15242	418M291N132M9221N241M1799N3140M	0.115874	152.117	31.81	0.35967	45.7327	118.975
afecbbb7-668c-42e2-97b4-2c2332dfe6aa.K562.5EU.60.labeled.II;0_chr1:12497000	chr1	+	12499453	12499929	477	477M	0.0191788	160.698	209.072	NA	NA	NA
57589937-99db-48be-94d7-bdf2707f950f.K562.5EU.60.labeled.heat.III;0_chr1:12507000	chr1	+	12507259	12507628	370	370M	NA	NA	NA	NA	NA	NA
bcb2a00f-df3e-4230-bef6-ff40c629e400.K562.5EU.0.unlabeled.I;16_chr1:12567000	chr1	+	12567915	12617666	49752	512M3D4300N122M5864N242M6D2M5D1M325N114M1110N146M36487N513M	0.708505	43.3339	132.235	0.264504	74.4112	77.71
84943ffe-987a-4cd4-8981-a1b7e5d73341.K562.5EU.0.unlabeled.II;0_NM_015866	chr1	+	13700199	13788078	87880	102M30699N118M1661N104M9122N153M30920N111M5229N4414M3683N1564M	0.139114	124.508	138.78	0.0986869	130.199	177.25
NM_001135610_015866	chr1	+	13700199	13823496	123298	102M15240N74M15385N118M1661N104M9122N153M7203N127M66939N144M6588N338M	0.146156	33.9811	114.115	0.0191788	160.698	194.38
70e89c6b-c628-4844-af46-1cf3facfb795.K562.5EU.60.labeled.IV;0_NM_015866	chr1	+	13700264	13787654	87391	37M15240N74M15385N118M1661N104M9122N153M7203N127M23590N111M13326N1140M	0.0179842	331.995	173.98	NA	NA	258.36
faca7f5c-f07b-4d0f-9292-806c2ff6998e.K562.5EU.0.unlabeled.I;16_chr1:14351000	chr1	+	14351872	14391137	39266	1271M1D2M37542N450M	0.0231049	62.6087	NA	0.0231049	62.6087	NA
a7185cef-b6f7-4747-ad48-fd32e5192b59.K562.5EU.60.labeled.IV;16_chr1:14352000	chr1	+	14352033	14419960	67928	1106M2D1M3D1M37542N63M707N119M17827N50M10043N1I464M	0.0763576	46.8654	58.3675	NA	NA	NA
a36a6627-f11d-4cef-8100-14b37c31f8cd.K562.5EU.60.labeled.heat.IV;16_chr1:14352000-1	chr1	+	14352033	14419960	67928	1110M1D2M37542N63M707N122M27917N2I464M	0.0924196	30.6383	NA	NA	NA	NA
d67a9d62-3e3d-4929-8d09-5c372e883cbb.K562.5EU.60.labeled.I;16_chr1:14364000	chr1	+	14364591	14376770	12180	12180M	NA	NA	NA	NA	NA	NA
3f1936df-92c3-4b48-97b4-2987013fb36c.K562.5EU.60.labeled.IV;16_chr1:14382000	chr1	+	14382317	14390751	8435	6025M2D2M2342N64M	NA	NA	NA	NA	NA	119.38
2dfcb828-066e-4e3d-9476-ad49edfbc8f7.K562.5EU.60.labeled.heat.V;16_chr1:14389000	chr1	+	14390147	14419960	29814	1422M27915N4M1I2M1D470M	0.088168	74.4112	98.7225	0.0626672	94.2796	-1
NM_018022_135082-1	chr1	+	15153663	15220478	66816	292M60940N537M3894N1153M	0.134125	70.4707	114.162	0.0594458	126.875	172.28
NM_001136218_001319665-2	chr1	+	15153716	15220478	66763	239M56535N73M4332N537M3894N1153M	0.115525	62.6087	NA	0.130777	43.6881	168.71
069247ac-5926-4ca8-9140-82cd83e0e3b0.K562.5EU.60.labeled.IV;0_NM_052929	chr1	+	15236514	15320390	83877	248M15009N107M20445N207M16869N268M7017N110M4411N237M7171N124M4320N131M3190N90M1356N105M1556N906M	0.138629	62.6087	144.105	0.0924196	30.6383	165.19
NM_024329_024329-3	chr1	+	15409916	15430320	20405	364M15591N148M1131N135M1308N1728M	1.03871	58.3248	84.04	0.443229	89.7093	133.85
2903e218-03f7-4451-bd5b-f2b0cccf0682.K562.5EU.1440.labeled.II;0_NM_024329	chr1	+	15409943	15430320	20378	337M15591N148M2574N1728M	0.184116	105.022	53.5	0.0732378	256.446	105.44
5d198f9c-e923-4d56-8196-8c297a8c2894.K562.5EU.0.unlabeled.III;16_chr1:15489000	chr1	+	15489724	15524202	34479	3313M1D855N107M1271N182M22657N288M5673N132M	0.0383576	160.698	NA	0.157152	69.3462	16.15
0ee3884c-0a9d-4421-8dc1-7f1ef06394d7.K562.5EU.0.unlabeled.II;16_chr1:15489000-1	chr1	+	15492276	15524249	31974	761M1D855N107M1271N177M9155N5M3D150M1D2M1I2M1231N83M819N171M797N1D4M1I34M10202N290M5673N179M	0.283992	77.1445	43.58	0.145519	96.572	143.7
c9abd359-fde3-4639-be78-017e82f0d279.K562.5EU.60.labeled.heat.I;0_chr1:15537000	chr1	+	15537045	15537628	584	584M	NA	NA	NA	NA	NA	NA
bf0c55d8-dcdb-4daf-b0d3-4d684eba3fed.K562.5EU.0.unlabeled.II;0_chr1:15603000	chr1	+	15603738	15605272	1535	1535M	0.0231049	62.6087	NA	NA	NA	NA
NM_032341_032341	chr1	+	15617471	15669043	51573	338M8860N130M3526N237M2877N127M4741N128M5087N129M6069N104M1882N190M4721N63M3157N9207M	0.532647	72.4399	157.38	0.434089	65.0895	158.07
60ef2a7f-1510-4709-945c-cc45a8331359.K562.5EU.60.labeled.heat.II;0_chr1:15658000	chr1	+	15658137	15659183	1047	1047M	NA	NA	NA	NA	NA	NA
24cb8d8d-47e0-4af8-a366-f3f013cb20fc.K562.5EU.0.unlabeled.I;0_NM_015164	chr1	+	15719766	15734766	15001	155M5396N229M1468N819M246N70M118N91M311N65M368N89M606N133M602N191M469N66M631N160M301N379M1068N970M	0.729624	65.5548	120.347	0.655466	48.0831	141.69
dc1243fe-5454-483a-8360-87e5a1275e51.K562.5EU.60.labeled.heat.V;16_NM_001089591	chr1	+	15807195	15807696	502	502M	NA	NA	NA	NA	NA	NA
ca15366a-e9b0-4560-894e-52ce6aaf149b.K562.5EU.60.labeled.II;0_chr1:15828000	chr1	+	15828240	15828731	492	492M	NA	NA	NA	NA	NA	NA
5027b40e-3391-4be0-acf9-c8ff67684a8d.K562.5EU.60.labeled.heat.IV;16_chr1:15834000	chr1	+	15834212	15834848	637	637M	0.127706	86.2938	NA	0.117765	135.208	162.795
fcf9dde8-a8ff-40b9-9c3f-847d8611e74b.K562.5EU.60.labeled.IV;0_NM_015001	chr1	+	15847821	15940457	92637	330M24665N1584M1802N477M32642N161M1619N201M4826N152M2646N126M352N1580M1265N101M5741N8176M896N483M166N195M1289N1162M	0.0986869	130.199	136.375	0.088168	74.4112	NA
45050c6d-02ed-45dd-aec8-ebf408267d04.K562.5EU.60.labeled.heat.II;0_chr1:15847000	chr1	+	15847841	15849038	1198	1198M	NA	NA	NA	NA	NA	NA
922cc48f-f274-4a26-81a5-49cb9758f832.K562.5EU.0.unlabeled.III;0_NM_015001	chr1	+	15933645	15940423	6779	4001M166N2612M	0.0361951	300.991	72.1175	NA	NA	NA
922cc48f-f274-4a26-81a5-49cb9758f832.K562.5EU.0.unlabeled.III;0_NM_015001-1	chr1	+	15937269	15940457	3189	377M166N2646M	0.0539527	331.995	130.787	0.0967042	150.411	188.02
c04bfd15-5dd6-4ffc-a5f7-bcac9d33530a.K562.5EU.60.labeled.IV;0_NM_015001-1	chr1	+	15937848	15940108	2261	1029M419N813M	NA	NA	NA	NA	NA	NA
b9b0f568-2158-4c26-8e69-a2344f17f343.K562.5EU.60.labeled.I;16_chr1:15941000	chr1	+	15941881	15976088	34208	374M78N85M104N1M3D2M1D205M325N138M199N5D116M79N122M92N88M404N299M93N3D145M97N264M512N127M2D1M311N138M640N189M1167N210M1D3M24540N80M2857N108M	0.42275	31.8415	48.0725	0.0924196	62.6087	105.35
489d1381-a922-4811-8989-9d913c14ef2c.K562.5EU.60.labeled.II;16_chr1:16228000	chr1	+	16228677	16232294	3618	3618M	0.0652885	78.3609	-0.5	0.0231049	62.6087	NA
d02ba1a9-f269-4e11-bb67-759740b5e330.K562.5EU.60.labeled.heat.IV;16_chr1:16230000-1	chr1	+	16231710	16237184	5475	594M212N134M246N121M594N153M2866N555M	NA	NA	56.26	NA	NA	NA
91658fb9-f8b4-4d68-bfda-5c4183ff5975.K562.5EU.60.labeled.heat.III;16_chr1:16241000	chr1	+	16241141	16352449	111309	284M1343N2I142M9376N121M691N60M482N94M1979N110M1D3M783N152M3D4M38020N127M10885N116M9249N270M2D999N225M4D5M35593N186M	NA	NA	NA	0.0202733	110.437	NA
5467c836-6924-48eb-bb47-a4c43ad27c47.K562.5EU.0.unlabeled.II;16_chr1:16246000	chr1	+	16246843	16250015	3173	3173M	0.0405465	110.437	139.222	0.0231049	62.6087	NA
f52f9284-0e35-4307-b613-228ff078f7b2.K562.5EU.60.labeled.heat.IV;16_chr1:16249000	chr1	+	16249901	16352436	102536	1878M497N5M5D121M691N60M482N94M1979N110M1D3M783N152M3D4M38020N127M10885N116M9249N270M2D999N132M35686N182M	0.0352215	505.059	78.19	0.088168	74.4112	5.02
fc4bedd1-20ed-4321-8f26-9671c36e7592.K562.5EU.0.unlabeled.III;16_chr1:16250000	chr1	+	16250657	16352467	101811	1122M497N5M5D121M691N60M482N94M1979N110M1D3M783N152M3D4M38020N127M10885N116M9249N272M36819N211M	0.0405465	110.437	115.135	NA	NA	NA
d480a0b2-10bb-4440-b88a-82a8b11100ab.K562.5EU.0.unlabeled.III;16_chr1:16351000	chr1	+	16351463	16352453	991	991M	NA	NA	NA	NA	NA	NA
NR_073503_073503-1	chr1	+	16367211	16396364	29154	98M25922N252M1555N1327M	0.0202733	110.437	NA	0.0392551	135.208	112.27
NR_073502_073502-1	chr1	+	16367211	16398142	30932	98M25919N255M1555N3105M	0.33351	95.2819	50.385	0.264504	74.4112	116.54
NM_001271869_001114600-1	chr1	+	16367211	16395595	28385	98M24066N50M1806N252M1555N558M	NA	NA	NA	NA	NA	NA
NM_001114600_001114600-1	chr1	+	16367252	16398142	30891	57M24066N50M1803N255M1555N3105M	0.335701	92.2777	83.06	0.232863	88.4662	114.99
NR_073503_073503-3	chr1	+	16367252	16398142	30891	57M25922N252M1555N3105M	0.255413	86.2938	90.65	0.0364643	271.042	-1
NM_001271869_001114600-2	chr1	+	16367252	16398142	30891	57M24066N50M1806N252M1555N3105M	0.438993	62.6087	121.323	0.162186	110.437	92.5
e1007851-d563-41c1-a588-4196a6f8d201.K562.5EU.60.labeled.heat.IV;0_NM_001114600	chr1	+	16387085	16398132	11048	41M4249N50M1803N255M1555N3095M	0.213569	57.3726	73.395	0.109861	38.8778	NA
NM_018090_001145277	chr1	+	16440734	16460081	19348	120M2778N101M4137N105M85N82M951N109M2636N178M3802N76M2948N1240M	0.476968	97.77	92.0125	0.54059	68.5032	136.68
f201cf6a-70e1-49d4-a77a-e122ee2b5776.K562.5EU.60.labeled.heat.III;0_chr1:16440000-2	chr1	+	16440734	16441615	882	120M312N450M	0.0202733	110.437	NA	NA	NA	97.07
e9806ac9-f6ca-4c4b-a65a-5bb6e98ef8ef.K562.5EU.60.labeled.IV;0_chr1:16440000	chr1	+	16440754	16441616	863	863M	0.12164	53.1793	119.263	0.109861	38.8778	175.88
a9e66ea3-f9c7-4531-8f3e-731d7e3e688c.K562.5EU.60.labeled.heat.III;16_chr1:16468000	chr1	+	16470721	16473863	3143	3143M	NA	NA	116.875	NA	NA	NA
24d2d9b2-4d53-4958-bdcf-70304c31ac0a.K562.5EU.60.labeled.IV;16_chr1:16513000	chr1	+	16513454	16514269	816	816M	NA	NA	NA	0.0231049	62.6087	NA
b2019d0f-f56f-4efe-b3d8-c370dd0c0bc0.K562.5EU.0.unlabeled.I;0_chr1:16514000	chr1	+	16514667	16515744	1078	1078M	NA	NA	NA	NA	NA	NA
a4cbf2ba-083c-4d8d-9871-6c45e5dfb4d7.K562.5EU.60.labeled.heat.IV;16_chr1:16533000	chr1	+	16533851	16534696	846	846M	0.0202733	110.437	NA	NA	NA	NA
4adebba3-2367-4f7e-b6b2-08a1363f8972.K562.5EU.1440.labeled.I;16_chr1:16544000	chr1	+	16544982	16545966	985	985M	NA	NA	NA	0.0231049	62.6087	NA
82363153-38e5-4525-99b9-8fe6f37a6f08.K562.5EU.60.labeled.heat.I;16_chr1:16562000	chr1	+	16562428	16567351	4924	1758M617N3D113M714N177M4D598N48M719N173M	0.0462098	62.6087	33.72	0.0371906	214.086	282.52
165b25e3-d77f-468b-a83b-9978faaad341.K562.5EU.60.labeled.I;16_chr1:16599000	chr1	+	16599604	16613540	13937	3721M5183N274M4561N3I198M	0.081093	110.437	131.33	0.0976267	140.246	195.43
ce59e06e-1458-4994-ad8a-a96fe0921813.K562.5EU.60.labeled.IV;16_chr1:16618000	chr1	+	16618259	16644665	26407	844M741N169M5748N3M1I3M2D4M1D234M1139N145M1178N180M2239N226M3I1M423N78M2D659N93M718N1M5D248M1675N1M5D141M9477N24M	0.0934459	203.136	255.847	0.0760081	173.734	177.26
3c406005-6c72-4284-bcc3-5d27dfb6125f.K562.5EU.60.labeled.heat.I;16_chr1:16618000	chr1	+	16618259	16643146	24888	844M741N401M5529N234M340N7D142M640N2D2M3D148M1178N180M2239N226M3I1M423N78M2D659N93M718N1M5D248M1675N1M5D141M7596N2D87M171N6D120M	0.329756	75.2003	228.375	0.178337	126.875	174.555
469ada36-2870-4fa0-b838-219a296c3d0d.K562.5EU.60.labeled.IV;16_chr1:16618000	chr1	+	16618259	16631099	12841	851M1I2M6672N224M340N7D142M640N2D2M3D148M1178N180M2239N211M	0.0748564	200.421	188.26	0.0760081	173.734	201.62
f2468807-8362-40a2-94ef-3d27175a8f35.K562.5EU.60.labeled.heat.III;16_chr1:16617000-2	chr1	+	16618556	16620522	1967	547M741N679M	NA	NA	NA	0.0231049	62.6087	NA
a56cd315-24fa-4e10-aa77-1eccc9d2a4c1.K562.5EU.60.labeled.heat.I;16_chr1:16618000	chr1	+	16618616	16644635	26020	487M741N175M5746N1M3D4M1D234M340N7D142M640N2D2M3D148M1178N180M2239N226M3I1M423N78M2D659N93M718N1M5D248M1675N1M5D141M7596N2D87M171N6D116M1363N3M2D125M	0.0231049	62.6087	NA	0.0202733	110.437	NA
840dd490-2457-4863-8506-eeb40405581c.K562.5EU.1440.labeled.II;0_chr1:16861000	chr1	+	16861932	16862947	1016	1016M	NA	NA	NA	NA	NA	NA
b0b360e4-5225-4b33-a623-9f2aaf3eae48.K562.5EU.60.labeled.heat.I;16_chr1:16894000	chr1	+	16894536	16895600	1065	1065M	NA	NA	NA	0.0231049	62.6087	NA
75947c82-4f85-4cc7-a8e6-0eb50bfb5de5.K562.5EU.60.labeled.VI;0_chr1:16895000	chr1	+	16895995	16896265	271	271M	NA	NA	NA	NA	NA	NA
d9d3eced-3bf0-480d-9b8e-246ea5036503.K562.5EU.60.labeled.I;0_NM_014675	chr1	+	16956766	16972938	16173	325M1492N168M2007N373M4592N170M106N121M288N164M1631N216M697N225M375N219M318N201M182N132M1592N579M	0.0549306	38.8778	28.4025	NA	NA	NA
03303602-c8ef-4053-8fb9-5774545e74d3.K562.5EU.0.unlabeled.II;0_NM_014675	chr1	+	16971593	16972971	1379	55M712N612M	NA	NA	NA	NA	NA	NA
0b403a36-744d-4ec0-b804-55bbfe68ce14.K562.5EU.0.unlabeled.II;16_chr1:16985000-1	chr1	+	16985957	17011947	25991	408M104N159M171N5M1D153M5D84N215M868N107M1D1M86N149M1D4M4D2M1211N76M1I4M1I2M118N107M118N5D161M1446N122M148N3M2D115M104N1M1I2M9D3M1D157M81N2M2D98M3D3M1044N205M2140N183M87N2M2D51M87N2I106M523N160M2835N124M100N5M3D69M87N129M1497N2D73M186N6D81M3D1M1955N79M1D1M279N127M192N58M301N184M127N97M5950N217M	0.167524	55.8758	69.85	0.164792	38.8778	109.875
12487669-9607-4ee7-b165-19143e5a3efb.K562.5EU.0.unlabeled.II;16_chr1:16985000	chr1	+	16985957	17011960	26004	408M104N159M171N5M1D153M5D84N215M868N107M1D1M86N149M1D4M4D2M1211N76M1I4M1I2M118N107M118N5D161M1446N122M148N3M2D115M104N1M1I2M9D3M1D157M81N2M2D98M3D3M1044N205M2140N183M87N2M2D51M87N2I106M523N160M2835N124M100N5M3D69M87N129M1497N2D73M186N6D81M3D1M1955N78M2D1M293N113M192N58M301N184M127N97M5950N230M	0.200662	35.392	44.355	0.405557	22.5668	148.275
0616420b-f485-40af-b09c-084860b5bf38.K562.5EU.60.labeled.heat.I;16_chr1:16985000	chr1	+	16985957	17011939	25983	408M104N159M171N5M1D153M5D84N215M868N107M1D1M86N149M1D4M4D2M1211N76M1I4M1I2M118N107M118N5D161M1446N122M148N3M2D115M104N1M1I2M9D3M1D157M81N2M2D98M3D3M1044N205M2156N1I167M87N2M2D51M87N2I106M523N160M2835N124M100N5M3D69M87N129M1497N2D73M186N6D81M3D1M1955N78M2D1M293N113M192N58M301N184M127N97M5950N209M	0.0988514	50.8162	NA	0.146156	33.9811	NA
51d27f0c-a0a6-4b84-917c-87b90fdf77f7.K562.5EU.60.labeled.heat.V;16_chr1:16985000	chr1	+	16985957	17011953	25997	408M104N159M171N5M1D153M5D84N215M868N107M1D1M86N149M1D4M4D2M1211N76M1I4M1I2M118N107M118N5D161M1446N122M148N3M2D115M104N1M1I2M9D3M1D157M81N2M2D98M3D3M1044N205M2140N183M87N2M2D51M87N2I106M523N160M2835N124M100N5M3D69M87N129M1497N2D73M186N6D81M3D1M1955N76M4D1M279N127M192N58M301N184M127N97M5950N223M	0.12164	53.1793	60.335	0.184839	30.6383	65.415
081d0f29-6702-4dfd-bdeb-229c980aaa0b.K562.5EU.0.unlabeled.I;16_chr1:16985000	chr1	+	16985957	17011885	25929	401M441N1M5D153M5D84N215M868N107M1D1M86N149M1D4M4D2M1211N76M1I4M1I2M118N107M118N5D161M1446N122M148N3M2D115M104N1M1I2M9D3M1D157M81N2M2D98M3D3M1044N205M2140N183M87N2M2D51M87N2I106M523N160M2835N124M100N5M3D69M87N129M1497N2D73M186N6D81M3D1M1955N79M1D1M279N127M192N58M301N184M127N97M5950N155M	0.0202733	110.437	72.685	0.0231049	62.6087	NA
3f15d062-d7ff-42e0-8a5e-40a2315fda0a.K562.5EU.60.labeled.IV;16_chr1:17018000	chr1	+	17018750	17054029	35280	212M1I1M3650N117M1242N3894M2D732N136M4323N87M11615N134M9059N76M	2.23505	65.4947	101.745	2.3974	45.3303	105.13
24ac9d74-b968-4c84-b8d8-64a8411979ca.K562.5EU.60.labeled.IV;16_chr1:17018000	chr1	+	17018750	17054029	35280	212M1I1M3650N117M1242N105M3675N1I116M788N80M4323N87M11615N134M9059N76M	0.144551	54.7527	103.522	0.200662	35.392	NA
0d4bbba9-a3f1-46f4-bb70-cda99d3c8393.K562.5EU.60.labeled.IV;16_chr1:17018000	chr1	+	17018750	17054029	35280	212M1I1M3650N117M1242N105M3675N1I114M2D732N131M16020N4M4D136M9059N76M	0.215599	81.5283	56.435	0.203254	67.8478	93.83
da183488-0015-4046-9d0a-f4ef1fd6dd2e.K562.5EU.0.unlabeled.II;16_chr1:17018000-2	chr1	+	17018750	17054029	35280	212M1I1M3650N117M1242N105M3675N1I114M2D732N136M4323N87M11615N134M9059N76M	3.11789	50.6285	69.2325	2.23497	51.7256	72.36
NM_012387_012387	chr1	+	17308210	17363990	55781	105M22654N181M2793N67M2149N68M1811N118M1532N126M2129N179M177N104M3625N112M1801N108M6484N155M1295N145M229N103M2378N71M371N129M4113N469M	0.13412	26.3128	69.315	NA	NA	NA
10f20bf0-f6d9-4911-92ba-a86a9e52ffdf.K562.5EU.60.labeled.I;16_chr1:17406000-3	chr1	+	17406761	17439722	32962	2428M780N3M1I74M2064N2M3D3M3D73M878N105M358N183M2762N169M4069N2I111M1374N89M413N133M1D4M2703N139M3421N94M9030N293M1015N7D178M	0.709564	110.437	121.26	0.401031	117.798	127.52
095d545f-dd6d-447c-a3ba-c609c51578d4.K562.5EU.60.labeled.heat.I;16_chr1:17406000	chr1	+	17406761	17438526	31766	2428M780N3M1I74M2064N2M3D3M3D73M878N3577M4069N2I111M1374N89M413N133M1D4M2703N139M3421N94M9030N297M	0.491222	134.204	126.36	0.383119	86.2938	122.25
0e348e98-1888-4f56-801a-a313a552c8bb.K562.5EU.60.labeled.I;16_chr1:17406000	chr1	+	17406778	17413566	6789	3268M2064N2M3D3M3D73M878N105M358N32M	0.128946	238.034	61.8225	0.0568456	178.123	129.17
10f20bf0-f6d9-4911-92ba-a86a9e52ffdf.K562.5EU.60.labeled.I;16_chr1:17406000	chr1	+	17406814	17439740	32927	2379M779N74M2064N2M3D3M3D73M878N105M358N183M2762N169M4069N2I111M1374N89M413N133M1D4M2703N139M3421N94M9030N293M1015N7D196M	0.444337	60.1286	58.5325	0.231049	62.6087	101.66
NM_030812_030812	chr1	+	17755383	17827061	71679	122M67480N372M2410N1295M	0.0376972	186.972	50.37	0.0549306	38.8778	47
7a26ecd6-4a34-45e3-bb47-9be2a10c17b7.K562.5EU.60.labeled.V;16_chr1:18457000	chr1	+	18457739	18458245	507	132M201N7D167M	NA	NA	NA	NA	NA	NA
ada94034-e212-4119-a629-fcee11ca3041.K562.5EU.0.unlabeled.II;16_chr1:18871000-1	chr1	+	18871423	18902582	31160	1538M1505N115M800N119M811N162M740N43M160N202M2D1M1685N65M2321N1M4D1M1D193M5D2M1231N68M77N3D149M2038N1M6D154M828N3M7D48M2850N92M557N95M12356N121M	0.105193	91.0784	41.835	0.130577	78.3609	107.86
5a32eae2-c62d-4a2e-8bd6-ceee0ae217ad.K562.5EU.60.labeled.heat.III;16_chr1:18904000	chr1	+	18904290	18907877	3588	3588M	NA	NA	NA	0.0231049	62.6087	89.8
9824b040-20af-4735-bdd3-c9df63de40c9.K562.5EU.1440.labeled.II;0_chr1:18909000	chr1	+	18909647	18910801	1155	74M713N368M	NA	NA	NA	NA	NA	35.47
7c04c320-4185-4a10-acc3-aa9b99d6396a.K562.5EU.60.labeled.IV;16_chr1:19074000	chr1	+	19074518	19095621	21104	377M1843N154M4449N8M3I222M2924N3M6D195M1446N119M408N145M993N3M1D115M2D1M821N6D211M3843N3M2I103M394N174M462N190M766N123M520N1I74M	0.164792	38.8778	148.262	NA	NA	NA
e0c75ae4-9b85-4ad5-a48c-40543b410f7a.K562.5EU.60.labeled.IV;16_chr1:19074000	chr1	+	19074518	19184089	109572	377M1843N161M1068N3D4M2D85M3280N2M1D3M1D223M2924N3M6D195M1446N119M408N145M993N3M1D115M2D1M821N6D211M3843N3M2I103M394N174M462N190M766N123M520N1I98M872N2M2I132M2I3M544N75M2315N4M1D84M698N198M948N2I115M1D2440N2M1D179M327N72M384N1M4D138M543N111M726N160M110N129M3128N1M1D130M1I3M157N81M1D2M276N84M1687N2M1D2M3D344M831N128M117N126M740N143M1D447N236M1583N195M408N85M959N2M2D87M599N147M478N165M840N248M501N2…	0.480419	47.6988	75.68	0.547378	35.0218	175.52
e44a0643-5698-4620-a1b4-ccfd50a8045b.K562.5EU.60.labeled.IV;16_chr1:19074000	chr1	+	19074518	19127733	53216	377M1843N161M1068N3D4M2D85M3280N2M1D3M1D223M2924N3M6D195M1446N119M408N145M993N3M1D115M2D1M821N6D211M3843N3M2I103M394N174M462N190M766N123M520N1I98M872N2M2I132M2I3M544N75M2315N2M3D1M2D81M698N198M948N2I115M1D2440N2M1D179M327N79M377N4D139M543N111M726N160M110N129M3128N1M1D130M1I3M157N81M1D2M276N84M1687N2M1D2M3D344M831N128M117N126M740N143M1D447N236M1583N195M408N85M959N2M2D87M599N147M478N165M840N248M501…	1.02968	26.7411	68.985	0.494376	38.8778	134.34
db6668f4-7f70-4d5e-a729-7b6164b1bdb1.K562.5EU.60.labeled.heat.III;16_chr1:19074000	chr1	+	19074518	19105779	31262	377M1843N161M1068N3D4M2D85M3280N2M1D3M1D223M2924N3M6D195M1446N119M408N145M993N3M1D115M2D1M821N6D211M3843N3M2I103M394N174M462N190M766N123M520N1I98M872N2M2I132M2I3M544N75M2315N2M3D1M2D81M698N198M948N2I115M1D2440N2M1D179M327N599M543N51M	0.251403	48.448	146.17	0.310174	36.6657	132.07
11871229-d064-4a36-a80b-93e43c3fa203.K562.5EU.60.labeled.IV;16_chr1:19209000	chr1	+	19209432	19210272	841	841M	0.0425688	86.2938	NA	NA	NA	319.29
NR_135114_135114	chr1	+	19210411	19240704	30294	149M29697N448M	NA	NA	NA	NA	NA	NA
46342331-d8c8-4901-bd2f-dddee5680efc.K562.5EU.60.labeled.VI;0_chr1:19210000	chr1	+	19210434	19213706	3273	3273M	NA	NA	167.66	0.0231049	62.6087	NA
a5a1de98-de78-49a6-9d15-128913cca215.K562.5EU.60.labeled.heat.II;16_chr1:19215000	chr1	+	19215661	19230956	15296	3820M86N132M1065N79M1773N1I2M3D950M1I5M3744N130M3393N114M	0.132852	175.612	123.162	0.182459	110.437	215.125
7259322d-5e1c-4143-a235-f23d2fe9b24a.K562.5EU.60.labeled.heat.I;16_chr1:19218000	chr1	+	19218091	19230956	12866	1390M86N132M1065N2807M1I5M3744N130M3393N114M	0.127706	86.2938	72.3625	0.164792	38.8778	NA
c6a5cfab-4266-4a36-89d8-68985da26746.K562.5EU.60.labeled.heat.IV;16_chr1:19218000	chr1	+	19218945	19251509	32565	536M86N132M1065N79M1773N1I2M3D211M553N5D1M2D2M1D175M1I5M3744N130M3393N116M299N1I1M1I163M1201N151M162N203M1994N120M1889N97M778N125M4D651N61M373N70M513N2M2D170M1D4M310N142M569N125M1200N1D4M1D129M1140N94M242N66M3D2M887N122M6384N96M	0.277259	62.6087	109.698	0.446963	43.1254	166.01
9292cfbc-63d1-437d-9104-457b1558d230.K562.5EU.60.labeled.VI;16_chr1:19218000	chr1	+	19218945	19251509	32565	536M86N132M1065N79M1773N1I2M3D211M553N5D1M2D2M1D175M1I5M3744N130M3393N116M299N1I1M1I163M1201N151M162N203M1994N120M1889N97M778N125M4D651N58M376N70M513N2M2D170M1D4M310N142M569N125M1200N1D4M1D129M1140N94M242N66M3D2M887N122M6384N96M	0.134125	70.4707	99.07	NA	NA	54.52
3c476fee-cf58-4088-9a80-2fd593943060.K562.5EU.0.unlabeled.I;16_chr1:19218000	chr1	+	19218945	19251509	32565	536M86N132M1065N46M1D5M1812N204M553N5D1M2D2M1D175M1I5M3744N130M3393N116M299N1I1M1I163M1201N151M162N203M1994N116M1892N98M778N125M4D651N58M376N70M513N2M2D170M1D4M310N142M569N125M1200N1D4M1D129M1140N94M242N66M3D2M887N122M6384N96M	NA	NA	51.8725	NA	NA	NA
NM_016183_016183-1	chr1	+	19251594	19260128	8535	270M2918N59M1107N104M1012N82M308N68M311N152M492N77M127N1448M	1.62274	56.3711	89.4175	1.29662	44.6433	86.38
7a9a4779-36e8-40fe-bfb7-430a16237e2a.K562.5EU.60.labeled.IV;0_NM_016183	chr1	+	19251821	19260128	8308	43M4084N104M1012N82M308N68M311N152M492N77M127N1448M	0.278025	84.4588	85.9475	0.163854	104.347	79.665
39cf2fb8-daac-4d2b-9411-ff9c135a16de.K562.5EU.1440.labeled.I;0_NM_016183-2	chr1	+	19257935	19260128	2194	619M127N1448M	0.195866	78.3609	55.2525	0.18546	42.3201	92.5
cd9b55b6-e91e-4f3f-b5a5-353edd91f83d.K562.5EU.60.labeled.VI;0_chr1:19262000	chr1	+	19263377	19264099	723	723M	0.0425688	86.2938	NA	NA	NA	NA
bf6fb905-5aba-4fc9-89cf-334e463c7e06.K562.5EU.60.labeled.V;16_chr1:19302000	chr1	+	19303971	19312088	8118	410M1631N137M1D853N102M212N93M747N108M6D186N188M1I5M3185N254M	3.88947	26.3128	94.7675	3.88636	25.9645	124.69
fe008973-c582-4766-bf60-b9557bb3855d.K562.5EU.60.labeled.IV;0_NR_109848	chr1	+	19312326	19329300	16975	30M373N161M4710N242M6791N130M763N57M662N143M143N93M603N186M1159N729M	0.0693147	62.6087	52.735	NA	NA	NA
NM_001040125_109848	chr1	+	19312326	19329300	16975	564M4710N242M6791N130M732N88M662N143M143N93M603N186M1159N729M	0.12164	53.1793	132.428	0.12164	53.1793	71.7
c309e423-7973-4ce2-8d7a-5fc5b0ebcb62.K562.5EU.60.labeled.heat.III;0_NR_109848	chr1	+	19312326	19329300	16975	33M370N161M4710N242M6791N130M732N88M662N143M143N93M947N1730M	0.088168	74.4112	180.43	0.0608198	110.437	141.64
a854d006-d218-45d6-8062-48f7cdf45f6b.K562.5EU.60.labeled.V;16_chr1:19338000	chr1	+	19338784	19485518	146735	836M1D1M1D2M4738N69M746N2M6D67M11382N115M669N1M1D143M20978N2I107M6851N130M34034N88M1D65684N82M	4.35889	30.0321	76.4225	2.89681	32.5434	83.24
5ca1188f-364f-410a-96b4-7dd911ed50d0.K562.5EU.60.labeled.heat.IV;16_chr1:19338000	chr1	+	19338784	19469536	130753	836M1D1M1D2M4738N69M746N2M6D67M11382N115M669N1M1D143M20978N2I107M6851N130M34034N89M49729N3I55M	0.775555	41.374	49.7	1.05797	35.5818	79.9
9218d30f-381d-4228-9501-6ed2690ee457.K562.5EU.60.labeled.heat.I;16_chr1:19339000	chr1	+	19339111	19345255	6145	5321M746N2M6D70M	0.0924196	30.6383	NA	0.0549306	38.8778	NA
d89f041c-9449-4d79-bcbe-fa418ebed3c8.K562.5EU.60.labeled.heat.V;16_chr1:19374000	chr1	+	19374184	19485518	111335	272M5D1M1D1M4078N107M6851N130M34034N88M1D65684N82M	NA	NA	55.26	NA	NA	NA
NM_001032363_001032363-1	chr1	+	19596993	19626598	29606	117M24990N48M1326N110M2803N212M	0.26824	26.3128	46.11	0.130777	43.6881	39.85
2b8c2191-cd6e-4474-a999-1944c8c2c4d4.K562.5EU.60.labeled.VI;0_NM_001032363-1	chr1	+	19596993	19626622	29630	117M17391N94M7505N48M1326N110M2803N236M	0.328899	59.2428	75.12	0.15343	76.1027	127.315
bfa3b9e0-3ab4-4bf3-843a-90166231d20b.K562.5EU.1440.labeled.II;0_NM_001032363	chr1	+	19596993	19626622	29630	686M25795N110M2803N236M	NA	NA	NA	0.0182322	271.042	-1
NM_001204083_001204083-1	chr1	+	19596993	19626622	29630	117M24990N48M1326N110M1808N241M754N236M	2.58006	40.8901	99.1625	1.82403	35.8307	114.75
NM_001204082_001204082	chr1	+	19596993	19626622	29630	117M26364N110M2803N236M	0.184839	30.6383	NA	0.146156	33.9811	NA
6511940b-a190-4e68-bb67-4cc752535606.K562.5EU.1440.labeled.II;0_NM_001032363	chr1	+	19596993	19626622	29630	117M18829N75M1244N79M4763N48M1326N110M2803N236M	1.15354	38.8778	79.3775	0.384514	38.8778	118.9
NM_001032363_001032363-3	chr1	+	19596993	19626622	29630	117M24990N48M1326N110M2803N236M	1.87469	45.7793	81.85	1.8224	31.4818	100.265
4f750046-3c55-4a7a-a465-7f5fffb5fc60.K562.5EU.0.unlabeled.III;0_NM_001032363	chr1	+	19597027	19626622	29596	83M24990N48M1330N106M2803N236M	0.330439	32.1677	78.525	0.0988514	50.8162	88.45
NR_033758_033758	chr1	+	19597027	19626622	29596	83M20148N79M4763N48M1326N110M2803N236M	0.806805	32.5052	73.0625	0.501651	42.6806	98.28
0dd06df2-fd0f-468a-a89a-d093033445ea.K562.5EU.60.labeled.heat.V;0_chr1:19597000	chr1	+	19597027	19598147	1121	83M724N314M	NA	NA	68.9	0.0231049	62.6087	NA
NR_033757_033757	chr1	+	19597027	19626622	29596	83M3677N185M21128N48M1326N110M2803N236M	0.266169	54.0377	105.39	0.18546	42.3201	NA
NM_001032363_001032363-2	chr1	+	19597027	19626622	29596	83M24990N48M1326N110M2803N236M	1.39976	40.7358	100.078	1.02675	25.4191	72.21
3a36b912-3bc6-408c-a0e6-1e992888cf05.K562.5EU.60.labeled.heat.V;0_chr1:19599000	chr1	+	19608088	19608573	486	486M	NA	NA	NA	NA	NA	NA
ed35bab6-dbbe-4976-a1d9-e4977847c38a.K562.5EU.60.labeled.VI;0_NM_001032363-2	chr1	+	19619713	19626622	6910	2435M1326N110M2803N236M	NA	NA	27.28	0.0202733	110.437	NA
f974389a-8d49-4f06-b6e0-72bb6c7e380e.K562.5EU.60.labeled.IV;16_chr1:19743000	chr1	+	19743319	19745271	1953	1953M	0.0191788	160.698	38.16	NA	NA	NA
9b382656-cb94-475c-9579-57065de23e9a.K562.5EU.60.labeled.heat.IV;16_chr1:19864000	chr1	+	19864212	19864479	268	268M	NA	NA	NA	NA	NA	NA
27ba5b30-8c7d-44d8-a032-77b9e856a191.K562.5EU.60.labeled.heat.IV;16_chr1:20184000	chr1	+	20184276	20186502	2227	345M1732N3D147M	0.167851	92.2777	115.797	0.095894	160.698	113.055
NM_152376_152376	chr1	+	20186109	20194697	8589	45M4393N4151M	0.231049	62.6087	160.81	0.0383576	160.698	73.87
866c5271-e2f1-46b7-b06a-d9a0e8a5dcd8.K562.5EU.60.labeled.heat.II;16_chr1:20482000	chr1	+	20482396	20485952	3557	1324M1494N739M	0.0594458	126.875	72.3575	0.088168	74.4112	99.45
866c5271-e2f1-46b7-b06a-d9a0e8a5dcd8.K562.5EU.60.labeled.heat.II;16_chr1:20482000-3	chr1	+	20483353	20486174	2822	367M1494N961M	0.0231049	62.6087	NA	NA	NA	NA
20240f93-d239-4399-9f5b-6fc11cd47e9d.K562.5EU.60.labeled.IV;16_chr1:20499000-1	chr1	+	20499450	20508140	8691	1969M649N124M2D1030N84M4590N1M5D237M	0.421245	59.9908	70.41	0.30543	46.8654	112.84
NM_032409_032409	chr1	+	20633469	20651318	17850	467M3906N288M1762N101M4497N183M887N164M2781N128M362N237M1202N885M	0.207944	62.6087	73.1075	0.173072	80.3397	99.1
c591fe17-ae30-4e76-9d2c-01965efb7ddb.K562.5EU.60.labeled.heat.III;16_chr1:20651000	chr1	+	20651781	20655537	3757	1990M448N1319M	0.68415	52.5046	42.7025	0.570444	50.3019	104.5
4c8142ff-560e-47f5-8c4f-f93bf5dcb856.K562.5EU.0.unlabeled.III;16_chr1:20651000-1	chr1	+	20651781	20661357	9577	936M121N3M1D5M1D123M655N145M448N153M242N93M732N91M136N5M5D99M315N1M6D91M4693N111M205N161M	2.09803	35.1994	122.688	1.55067	35.2618	137.075
830a279b-f401-4510-b966-448045998a25.K562.5EU.0.unlabeled.III;16_chr1:20649000-3	chr1	+	20651847	20661379	9533	685M1D2M91N91M121N3M1D5M1D123M655N145M448N153M242N93M732N91M136N5M5D99M315N1M6D91M4693N111M205N183M	2.59081	35.0794	112.498	2.64384	26.9757	107.385
235299ac-ef1e-4939-a939-622149536b08.K562.5EU.1440.labeled.III;16_chr1:20651000-1	chr1	+	20651847	20661379	9533	685M1D2M91N91M121N3M1D5M1D123M655N145M448N153M242N93M732N91M136N5M5D102M5101N113M205N183M	0.426488	48.7269	-0.25	0.236618	57.8963	147.83
b19a3433-af02-4354-815c-8c8ef1f900b4.K562.5EU.60.labeled.heat.I;16_chr1:20651000	chr1	+	20651847	20661357	9511	685M1D2M91N91M121N3M1D5M1D123M655N145M448N153M242N93M732N91M136N5M5D5316M205N161M	0.919422	40.2996	69.055	0.912229	29.4647	82.72
830a279b-f401-4510-b966-448045998a25.K562.5EU.0.unlabeled.III;16_chr1:20649000-1	chr1	+	20652201	20661437	9237	331M1D2M91N91M121N3M1D5M1D123M655N145M448N153M242N93M732N91M136N5M5D99M315N1M6D91M4693N111M205N241M	0.584512	22.8894	119.175	0.462098	30.6383	89.69
5d17fa74-ed8b-4e50-8c96-94d3fbaef4e8.K562.5EU.1440.labeled.I;16_chr1:20742000	chr1	+	20742457	20775502	33046	2637M451N112M1887N112M2067N161M1D12345N172M2975N158M4D5394N138M2377N2055M	0.0527797	517.801	21.285	0.0175601	543.791	300.48
af493827-b1a4-462c-b798-ec9c0b4955c7.K562.5EU.60.labeled.VI;16_chr1:20742000-1	chr1	+	20742677	20787320	44644	2417M451N112M1887N112M2067N162M7283N88M8120N158M5D2047N81M3D3262N139M2377N163M2986N154M3061N100M426N7D194M6654N128M	0.152697	167.191	209.065	0.180957	115.884	148.615
3036b8b8-69ab-47ee-b032-be6bc6b1e974.K562.5EU.60.labeled.IV;16_chr1:20742000	chr1	+	20742677	20786651	43975	2417M451N112M1887N112M2067N162M7283N88M8120N158M5D2047N81M3D3262N139M2377N163M2986N154M3061N100M426N7D194M5645N468M	0.0890209	397.408	131.218	0.0361951	300.991	184.895
f3b3a3c0-48c0-4ef9-ac74-5fdfb0d0e98a.K562.5EU.60.labeled.IV;16_chr1:20742000	chr1	+	20742677	20786651	43975	2417M451N112M1887N112M2067N162M15494N155M5D2047N81M3D3262N139M2377N2557M591N155M3061N100M426N7D194M5712N401M	0.0550109	251.634	215.395	0.0172919	919.561	171.855
5005c8d5-546b-4b9c-9af0-9ad89f5098e3.K562.5EU.60.labeled.VI;16_chr1:20742000	chr1	+	20742740	20787310	44571	437M1572N3I345M451N112M1887N112M2067N162M15494N155M5D2047N69M3264N2M1I5M2D143M2377N3303M3061N100M426N7D194M6654N118M	0.0182322	271.042	87.805	0.0549306	38.8778	NA
f6222496-4f1e-4843-81e7-d0381f0a4f47.K562.5EU.60.labeled.heat.III;16_chr1:20742000	chr1	+	20742740	20786613	43874	2354M451N112M1887N112M2067N252M7190N91M8120N158M5D2047N81M3D3262N139M2377N3303M3061N100M426N7D194M5645N430M	0.0739582	227.974	300.455	0.0544192	290.894	285.18
19d1dc5e-3209-408f-a4b0-f3687b992f58.K562.5EU.60.labeled.IV;16_chr1:20742000	chr1	+	20742740	20786651	43912	2354M451N112M1887N112M2067N162M7303N68M8120N158M5D2047N81M3D3262N139M2377N2557M591N155M3061N100M426N7D194M5645N468M	0.0568456	178.123	245.525	0.0179842	331.995	241.64
f24ea11a-6e4b-45de-96a7-ca81a48f78ea.K562.5EU.60.labeled.heat.IV;16_chr1:20754000	chr1	+	20754119	20786651	32533	3137M8120N158M5D2047N81M3D3262N139M2377N2557M591N155M3061N100M426N7D194M5645N468M	0.0352215	505.059	188.245	0.0176675	467.806	19.145
6c702414-6c3a-433a-9198-c2432557e239.K562.5EU.60.labeled.heat.III;16_chr1:20806000	chr1	+	20806475	21050936	244462	1026M1D2M3D4M3233N142M2I3M1I2M2276N72M4152N148M7561N99M2418N84M1448N124M11583N175M8386N116M4D1723N213M2083N4M2I118M5D3M1295N93M2334N3I87M2887N137M1712N2I98M2143N241M1D2M2D400N145M14060N197M6680N172M2I4M6249N107M787N112M1732N3M1I136M4195N247M4939N89M36519N840M7672N106M19365N123M5D2M3400N97M1D5M7233N106M598N3M1D180M21485N96M1D1M48056N70M	0.248592	98.2946	109.317	0.115073	160.698	176.28
6596d5ea-75e3-4cfb-b6d9-f7277183f9d4.K562.5EU.60.labeled.V;16_chr1:20806000	chr1	+	20806480	21089205	282726	1021M5657N81M4152N155M2D5M7559N87M2418N84M1448N124M11583N175M8386N108M1724N2M1D3M2D224M2083N2I114M5D3M1295N93M2334N3I87M2887N137M1712N2I98M2143N241M1D2M2D400N145M14060N197M6680N172M2D2M7143N112M1732N3M1I136M4195N247M4939N89M36519N840M7672N110M7D4M19355N118M5D2M3400N97M1D5M7233N106M598N3M1D180M19971N127M1D1M1387N94M1D1M48056N129M1D38142N67M	0.0594458	126.875	59.68	0.0191788	160.698	61.13
ed400488-7c0b-4f14-9ff9-34bb23960a83.K562.5EU.60.labeled.heat.IV;16_chr1:20807000	chr1	+	20807081	21176881	369801	420M1D2M3D4M3233N142M2I3M1I2M2276N72M4152N155M2D5M7559N87M2418N84M1448N124M11583N175M8386N116M4D1723N221M2083N2I114M5D3M1295N93M2334N3I87M2887N137M1712N2I98M2143N241M1D2M2D400N145M14060N197M6680N172M2D2M7143N112M1732N3M1I136M4195N247M4939N89M36519N840M7672N106M19365N123M5D2M3400N97M1D5M7233N106M598N3M1D180M19971N115M1D1399N95M1D1M48056N129M1D38142N117M86919N707M	0.0763576	46.8654	NA	NA	NA	109.26
6203c729-9be1-437f-846d-aef16db1e752.K562.5EU.60.labeled.heat.I;16_chr1:20960000	chr1	+	20960852	20965688	4837	4837M	NA	NA	NA	NA	NA	NA
31e67dc4-3cd1-4673-afd0-02bc982d6441.K562.5EU.0.unlabeled.II;16_chr1:21175000	chr1	+	21175119	21176881	1763	1236M360N3D164M	0.0828639	98.2946	224.885	0.0626672	94.2796	146.12
0bd27bd6-c2c5-480e-9828-ba985ef4d18b.K562.5EU.60.labeled.heat.IV;16_chr1:21423000	chr1	+	21423113	21425520	2408	1750M601N3D54M	NA	NA	NA	0.0185953	214.086	NA
829b7250-43a2-41b4-94bf-22d75e230ad0.K562.5EU.0.unlabeled.III;0_chr1:21453000	chr1	+	21453408	21457129	3722	3722M	NA	NA	NA	NA	NA	NA
b63ef539-d954-412d-becc-9c8fe24b427f.K562.5EU.60.labeled.heat.II;16_chr1:21596000	chr1	+	21596252	21669353	73102	1016M2I3M423N38M232N100M335N105M5D1M3D1M983N121M2066N113M1006N111M1D1M3151N133M2015N138M499N84M638N80M473N145M1175N2M1D130M134N101M201N2M8D83M1061N5D55M398N84M279N101M3D3213N181M442N40M1044N1M6D1M2D50M942N36M2I1M6255N89M6I2M5I1M1I11M42822N1D6M6D3M3D101M	0.088168	74.4112	150.19	0.225612	28.1921	93.665
97997b7a-aded-4b22-a550-dc59518ad7d2.K562.5EU.60.labeled.V;16_chr1:21596000	chr1	+	21596252	21651885	55634	1016M2I3M423N38M232N132M304N104M5D1M3D1M983N121M2066N113M1006N111M1D1M3151N133M2652N84M638N80M473N145M1175N2M1D130M134N101M201N2M8D83M1061N5D55M398N84M279N101M3D3213N181M442N40M1044N1M6D1M2D50M942N36M2I1M6255N89M6I2M5I1M1I11M25357N117M	0.12164	53.1793	-1	0.0924196	30.6383	88.11
dd38c4ab-7c7e-4475-9222-3aa680ba0b5e.K562.5EU.60.labeled.heat.II;16_chr1:21678000	chr1	+	21678899	21782872	103974	537M7730N5M1I6M1D9M3I4M3I48M2734N129M4966N154M6276N102M1909N110M643N133M1334N109M288N57M278N4M1D123M152N1M2D120M8520N74M5578N132M1D482N113M3D4M2130N198M4474N147M984N128M1I1M6617N174M10441N84M988N134M3235N109M906N1M5D123M335N1M5D129M3426N154M957N3M3D121M25040N49M	0.0376972	186.972	108.225	0.111125	72.0459	170.945
e0077e71-862d-4e34-94a3-72f406b71285.K562.5EU.60.labeled.heat.III;16_chr1:21678000-2	chr1	+	21678899	21783044	104146	537M7730N5M1I6M1D9M3I4M3I48M2734N129M4966N154M6276N102M1909N110M643N133M1334N109M288N57M278N4M1D123M152N1M2D120M8520N74M5578N132M1D482N113M3D4M2130N198M4474N147M984N131M1D2M6612N174M10441N84M988N134M3235N109M906N1M5D123M335N1M5D129M3426N154M957N3M3D121M25040N221M	0.0951768	171.11	123.53	0.0626672	94.2796	115.37
5abb3752-b7b9-4618-8a3c-ec55b3e1a7cf.K562.5EU.60.labeled.I;16_chr1:21678000	chr1	+	21678899	21783092	104194	537M7730N5M1I6M1D9M3I4M3I48M2734N127M1D1M11397N101M1909N110M643N126M4D1M1D1M1334N109M288N57M278N4M1D123M152N1M2D120M8520N74M5578N132M1D482N113M3D4M2130N4819M984N119M6612N9M1D179M10441N84M988N134M3235N109M906N1M5D123M335N1M5D129M3426N154M957N3M3D121M25040N269M	0.0967042	150.411	139.532	0.0575364	160.698	111.695
5eccf723-d363-40fb-bae8-61d2c2420151.K562.5EU.60.labeled.heat.III;16_chr1:21678000	chr1	+	21678899	21725990	47092	537M7730N5M1I6M1D9M3I4M3I48M2734N129M4966N154M6276N102M1909N110M643N126M4D1M1D1M1334N109M288N57M278N4M1D123M152N1M2D120M8520N74M5578N132M1D482N113M3D4M2130N2090M	0.0594458	126.875	42.56	0.0376972	186.972	39.615
9b1498f5-b95d-4e18-877a-252730201e1b.K562.5EU.60.labeled.heat.IV;16_chr1:21679000	chr1	+	21679067	21783142	104076	369M7730N5M1I6M1D9M3I4M3I48M2734N129M4966N154M6276N102M1909N110M643N133M1334N109M288N57M278N4M1D123M152N1M2D120M8520N74M5578N132M1D482N113M3D4M2130N195M3D2M4467N152M984N131M1D2M6612N174M10441N84M988N134M3235N109M906N1M5D123M335N1M5D129M3426N154M957N3M3D121M25040N319M	0.081093	110.437	136.273	0.109861	38.8778	108.76
4a3eb503-53e8-41a1-80b1-eff037b7f288.K562.5EU.60.labeled.heat.I;16_chr1:21679000	chr1	+	21679524	21783097	103574	1311M6356N48M2734N129M4966N154M6276N102M1909N110M643N133M1334N148M249N57M278N4M1D123M152N1M2D120M8520N74M5578N129M4D482N113M3D4M2130N4819M984N119M6612N9M1D179M10441N84M988N134M3235N109M906N1M5D123M335N1M5D129M3426N154M957N3M3D121M25040N274M	0.095894	160.698	81.635	0.107799	81.5283	NA
acaf7a79-437d-48fb-8d74-b95f8f8bf5b1.K562.5EU.60.labeled.heat.I;16_chr1:21727000	chr1	+	21727854	21783142	55289	866M984N128M1I1M6617N174M10441N84M988N134M3235N109M906N1M5D123M335N1M5D129M3426N154M957N3M3D121M25040N319M	0.0583832	143.621	32.45	0.0924196	62.6087	43.77
2c0f19a8-dcda-4e42-a52c-f0547591e78a.K562.5EU.60.labeled.heat.I;16_chr1:21822000	chr1	+	21822245	21857041	34797	1245M1D1M1D6M125N97M1D3M401N1I75M98N1M3D73M160N80M82N6D77M1D3082N47M109N1M1I6M2D126M102N172M408N242M303N220M388N102M890N112M4D4M120N105M1I5M139N94M1D5M88N137M6D2M692N112M3D658N116M82N145M197N1M4D112M753N267M594N98M1164N204M1818N262M4D281N182M271N196M1D4M1082N180M1D252N135M1D327N139M96N145M389N152M376N1I133M706N3D158M1808N146M186N2M6D152M748N6D143M2D194N148M117N136M549N147M5D6M1D1M92N135M1009N157M…	0.65589	67.4862	111.263	0.115874	152.117	130.48
3c72b43c-f326-4846-beb2-4f9635bbcd91.K562.5EU.60.labeled.IV;0_chr1:21907000-2	chr1	+	21907084	21911146	4063	209M3567N287M	0.0231049	62.6087	NA	NA	NA	NA
3c72b43c-f326-4846-beb2-4f9635bbcd91.K562.5EU.60.labeled.IV;0_chr1:21907000	chr1	+	21907113	21912014	4902	180M3567N1155M	0.0462098	62.6087	122.36	NA	NA	NA
NR_023919_023919	chr1	+	22025497	22031212	5716	147M4636N933M	0.30582	58.9839	124.487	0.439445	38.8778	123.03
6066ddf8-3239-4487-9afe-278354b84665.K562.5EU.60.labeled.V;0_chr1:22025000	chr1	+	22025522	22031212	5691	118M4643N930M	0.13412	26.3128	NA	NA	NA	150.39
NM_001791_044472-2	chr1	+	22052687	22092940	40254	56M25686N155M3138N73M4644N110M120N198M4561N1513M	1.65227	74.569	99.015	1.03843	80.3397	100.9
NM_001039802_044472	chr1	+	22052687	22091574	38888	56M21351N126M4209N155M3138N73M4644N110M120N198M4561N147M	0.13412	26.3128	11.885	0.0202733	110.437	NA
NM_044472_044472	chr1	+	22052723	22090130	37408	20M25686N155M3138N73M4644N110M120N198M3076N188M	0.0425688	86.2938	8.85	NA	NA	NA
325ed245-1643-44ee-8dc9-d892612dfde2.K562.5EU.1440.labeled.II;0_NM_044472	chr1	+	22078427	22090130	11704	157M122N176M2840N73M4644N428M3076N188M	NA	NA	NA	NA	NA	NA
b555a20d-d5fd-4b01-a73f-d62999f03948.K562.5EU.60.labeled.V;0_NM_044472	chr1	+	22078427	22092935	14509	157M3138N73M4644N110M120N198M4565N1504M	0.34055	86.2938	60.6075	0.188001	94.2796	92.37
82cb95ad-cf49-4735-a643-60e321e59d54.K562.5EU.60.labeled.V;0_chr1:22091000	chr1	+	22091596	22092941	1346	1346M	0.380772	118.187	72.31	0.228379	97.198	82.68
2588ad1e-825a-4fb6-bcba-41f0395e7497.K562.5EU.60.labeled.heat.V;0_chr1:22163000	chr1	+	22163353	22175736	12384	144M8558N3682M	NA	NA	NA	NA	NA	NA
2a488744-b15b-4a6c-9c1b-a7803a7644aa.K562.5EU.0.unlabeled.III;0_NM_014870	chr1	+	22451873	22530686	78814	132M37875N766M754N134M9958N950M3607N193M1759N137M392N202M368N134M1945N169M328N459M789N207M4169N165M2596N215M1220N163M718N87M1754N227M1757N4485M	0.0986869	130.199	100.52	0.0828639	98.2946	118.315
NM_015013_001009999	chr1	+	23019482	23083680	64199	466M10521N166M19752N134M3240N79M1229N93M770N107M1445N82M1507N95M9371N143M379N91M2073N135M764N74M1094N112M3824N133M1629N188M375N115M1778N128M646N147M812N502M	0.231049	62.6087	119.517	0.228379	97.198	143.07
459238b3-d34b-4634-9a42-7f4212a399d9.K562.5EU.60.labeled.IV;0_NM_001009999	chr1	+	23019482	23083680	64199	466M10521N166M13792N60M5900N134M3240N79M1229N93M770N107M1445N82M1507N95M9371N143M379N91M2073N135M764N74M1094N112M3824N133M1629N188M375N115M1778N128M646N147M812N502M	0.577623	62.6087	109.03	0.590157	41.0724	89.62
d6fc1536-9f77-4f88-8479-5227dc72d425.K562.5EU.60.labeled.IV;0_NM_001009999-1	chr1	+	23019482	23083657	64176	466M10521N166M19752N134M3240N79M1229N93M770N107M1445N82M1507N95M9371N143M379N91M2073N135M764N74M1094N112M3824N133M1629N188M375N115M1778N128M646N147M83N1208M	0.259678	58.3248	49.275	0.081093	110.437	96.85
94cd725a-78d4-437c-be9e-a7cfc69f8389.K562.5EU.60.labeled.IV;0_NM_001009999	chr1	+	23019504	23083680	64177	444M10521N166M13792N60M5900N134M3240N79M1229N93M770N107M1445N82M1507N95M9371N143M379N91M2073N135M764N74M1094N112M3824N133M1629N188M375N115M1778N128M646N147M83N1231M	0.563644	68.2672	130.67	0.265183	106.685	137.77
5caa5715-8083-4e49-9026-818adde0958e.K562.5EU.0.unlabeled.I;0_NM_001009999-1	chr1	+	23019539	23083680	64142	409M10521N166M19752N134M3240N79M1229N93M770N107M1445N82M1507N95M9371N143M379N91M2073N135M764N74M1076N130M3824N133M1629N188M375N115M1778N128M646N147M812N502M	0.103094	100.711	48.7	0.0371906	214.086	136.25
acab859c-4d72-47fa-9f65-688b6197185c.K562.5EU.60.labeled.IV;0_NM_001009999	chr1	+	23019539	23076573	57035	409M10521N166M13792N60M5900N134M3240N79M1229N93M770N107M1445N82M1507N95M9371N143M379N91M2073N135M764N74M1094N112M1064N2106M	0.0202733	110.437	NA	0.0202733	110.437	123.63
fa9dfe03-778a-4ab1-862e-84f1017ddb94.K562.5EU.60.labeled.V;0_NM_001009999	chr1	+	23019741	23083635	63895	207M10521N166M19752N134M3240N79M1229N93M770N107M1445N82M1507N95M12057N135M764N74M1094N112M3824N133M1629N188M375N115M1778N128M646N147M812N457M	NA	NA	NA	0.0462098	62.6087	52.52
0ed76730-6219-4fbb-aaf3-54885d760acc.K562.5EU.60.labeled.IV;0_NM_001009999	chr1	+	23055069	23083680	28612	93M770N107M1445N82M1507N95M9371N143M379N91M2073N135M764N74M1094N112M3824N133M1629N188M375N115M1778N128M646N136M823N502M	0.0185953	214.086	NA	NA	NA	NA
990bed36-464b-4374-9601-eb39f513bbb4.K562.5EU.60.labeled.heat.III;0_NM_001009999	chr1	+	23056448	23083625	27178	1118M1507N95M9371N143M379N91M2073N135M764N74M1094N112M3824N133M1629N188M375N115M1778N128M646N1406M	NA	NA	NA	0.0425688	86.2938	202
a800a1eb-2d07-478d-9808-737bd8f737bc.K562.5EU.0.unlabeled.II;0_NM_001009999	chr1	+	23068300	23083680	15381	382M379N91M2073N135M764N74M1094N112M3824N1950M375N115M1778N128M646N147M83N1231M	0.158129	128.951	36.1725	0.0785102	135.208	67.89
49977655-3317-447c-a4db-e1efeabe042c.K562.5EU.60.labeled.IV;16_chr1:23078000	chr1	+	23083177	23083689	513	513M	0.107799	81.5283	NA	0.0785102	135.208	71.195
4e6e6675-f0cf-440a-ae41-deda3be99516.K562.5EU.60.labeled.VI;16_chr1:23084000	chr1	+	23084030	23168844	84815	5025M1D2135N3191M6D6M14635N97M59638N81M	0.176336	74.4112	59.92	0.207944	62.6087	104.29
00f185f1-64a2-4a9a-b6cd-e4f11e3faf8e.K562.5EU.60.labeled.heat.I;16_chr1:23280000	chr1	+	23281310	23283143	1834	1834M	0.0376972	186.972	115.665	0.0405465	110.437	445.54
2f5836a2-5e07-4f75-9ef7-1d7ddf6a817a.K562.5EU.60.labeled.heat.III;16_chr1:23301000	chr1	+	23301938	23344267	42330	2166M2305N4658M3D2M1D2M130N105M2228N5M4D3M1I2M1I152M1I2M4782N1I203M2839N137M1892N171M14018N3D111M628N118M2243N170M3193N54M	0.210226	165.415	89.3075	0.190301	88.9495	131.82
51b938a1-0e28-4a1a-abbf-232e473fe39a.K562.5EU.60.labeled.heat.I;16_chr1:23304000	chr1	+	23304714	23308068	3355	3355M	NA	NA	NA	NA	NA	165.09
bd1a2209-e4d6-4393-af69-3b8ac83833ad.K562.5EU.60.labeled.heat.I;16_chr1:23309000	chr1	+	23309790	23344304	34515	1277M3D2M1D2M130N117M2230N152M1I2M4782N1I208M2830N141M1892N171M14018N3D111M628N120M5604N2I91M	0.0356084	397.408	95.68	0.0356084	397.408	39.3
dd87ac27-80a2-4e48-a3f1-4152fecf4e1b.K562.5EU.0.unlabeled.III;16_chr1:23309000-2	chr1	+	23309790	23344267	34478	1277M3D2M1D2M130N117M2230N152M1I2M4782N1I203M2839N137M1892N171M9785N116M4122N109M628N118M2243N170M3193N54M	0.410995	65.2274	72.68	0.115525	62.6087	58.04
06021a3d-4a85-471a-bbe6-56f384f4a248.K562.5EU.60.labeled.heat.II;16_chr1:23309000-2	chr1	+	23309790	23344267	34478	1277M3D2M1D2M130N117M2230N152M1I2M4782N1I203M2839N137M1892N171M9785N116M4122N109M628N120M5604N2I54M	0.184839	62.6087	74.8375	0.365015	37.0074	96.2
ac207455-7aab-4015-a7d4-8ca717b1140f.K562.5EU.60.labeled.VI;16_chr1:23309000	chr1	+	23309790	23338593	28804	1277M3D2M1D2M130N117M2230N153M1D7824N134M11854N113M4122N109M628N104M	0.138629	62.6087	NA	0.0178042	397.408	117.14
437f876f-0f76-442a-bb34-7e7cb187e2d6.K562.5EU.60.labeled.V;16_chr1:23309000	chr1	+	23309790	23344316	34527	1277M3D2M1D2M130N117M2230N152M1I2M4782N1I203M2839N137M1892N171M14018N3D111M628N120M5604N2I103M	0.0775387	147.859	96.3825	0.175094	49.1253	122.25
d65265ad-eaef-433f-8c5e-6096437ac6c8.K562.5EU.60.labeled.heat.II;16_chr1:23309000	chr1	+	23309790	23344267	34478	1277M3D2M1D2M130N117M2230N152M1I2M4782N1I208M2830N141M1892N171M9785N116M4122N109M628N118M2243N173M3190N54M	0.203254	67.8478	140.357	0.167524	55.8758	137.82
85a09a18-5ce3-4a8c-866e-59cecdd915f1.K562.5EU.60.labeled.VI;16_chr1:23309000	chr1	+	23309790	23344304	34515	1277M3D2M1D2M130N117M2230N152M1I2M4782N1I208M2830N141M1892N171M9785N116M4122N109M628N120M5604N2I91M	0.277259	62.6087	86.915	0.0405465	110.437	97.5
bda8e30b-5a51-4b99-a7d9-c68c70cc37f9.K562.5EU.60.labeled.IV;16_chr1:23309000	chr1	+	23309790	23344316	34527	1277M3D2M1D2M130N117M2230N152M1I2M4782N1I203M2839N137M1892N171M9785N116M4122N109M628N118M2243N173M3190N103M	0.24668	102.325	96.61	0.231049	62.6087	140.095
06021a3d-4a85-471a-bbe6-56f384f4a248.K562.5EU.60.labeled.heat.II;16_chr1:23309000-1	chr1	+	23309805	23344317	34513	1262M3D2M1D2M130N117M2230N152M1I2M4782N1I203M2839N137M1892N171M9785N116M4122N109M628N120M5604N2I104M	0.316201	42.8907	20.785	0.0179842	331.995	NA
dd87ac27-80a2-4e48-a3f1-4152fecf4e1b.K562.5EU.0.unlabeled.III;16_chr1:23309000	chr1	+	23309844	23344317	34474	1223M3D2M1D2M130N117M2230N152M1I2M4782N1I203M2839N126M1889N8M3D174M9785N116M4122N109M628N118M2243N170M3193N104M	0.0185953	214.086	41.63	0.0763576	46.8654	NA
397c66ce-03d0-481b-86fc-0c88a86b7718.K562.5EU.1440.labeled.I;16_chr1:23309000	chr1	+	23309844	23333676	23833	1223M3D2M1D2M130N117M2230N152M1I2M4782N1I203M2839N2200M9785N162M	0.0191788	160.698	46.875	NA	NA	NA
14616887-e3c6-4c6f-9dc3-6cea9206db5d.K562.5EU.1440.labeled.II;16_chr1:23309000	chr1	+	23309844	23344316	34473	1223M3D2M1D2M130N117M2230N153M1D19814N111M4122N109M628N120M5604N2I103M	0.0231049	62.6087	NA	NA	NA	NA
fe9dc500-977f-4d61-b6c7-4159e3318870.K562.5EU.60.labeled.heat.I;16_chr1:23324000	chr1	+	23324703	23344317	19615	424M8381N2M1I4M1D116M4122N109M628N120M5604N2I104M	0.0231049	62.6087	NA	0.0231049	62.6087	NA
1e6773c7-843b-42c9-a051-a3bc97e05685.K562.5EU.60.labeled.IV;16_chr1:23356000	chr1	+	23356202	23357829	1628	1628M	0.0924196	30.6383	40.295	NA	NA	NA
273c8924-9af7-46a9-861d-16e4a5b5154d.K562.5EU.60.labeled.VI;16_chr1:23359000	chr1	+	23359451	23369814	10364	3773M3822N2I119M804N97M1294N6D449M	0.0549306	38.8778	79.335	0.0652885	78.3609	72
1fca64cd-5d69-4a08-8ec3-d3ac77df54c1.K562.5EU.0.unlabeled.II;16_chr1:23359000	chr1	+	23359483	23369814	10332	3741M3822N2I2769M	0.146156	33.9811	NA	0.0924196	30.6383	101.59
5d8b18e9-7be3-404a-92d7-aa7329c3d443.K562.5EU.60.labeled.I;0_NR_033691	chr1	+	23369017	23371735	2719	2193M303N223M	0.0182322	271.042	91.455	0.0182322	271.042	100.375
f93bf6b7-4313-4690-ab7e-acc37df092f3.K562.5EU.60.labeled.IV;0_NR_033690	chr1	+	23369255	23371740	2486	2486M	0.088168	74.4112	124.435	0.088168	74.4112	86.13
11c40481-6fa6-4b07-8dde-0de07947549d.K562.5EU.60.labeled.heat.IV;16_chr1:23428000	chr1	+	23428608	23434593	5986	1311M1D1106N3M2I1M1I96M570N223M1158N196M152N111M93N67M560N107M158N1M1I2M4D1M1D2M1D61M	0.0202733	110.437	NA	0.0405465	110.437	92.76
66a38079-3bbf-414c-b54b-f8ccae8efbb1.K562.5EU.0.unlabeled.II;16_chr1:23505000	chr1	+	23505214	23531206	25993	974M10149N193M1D3M2487N110M1782N155M761N2M1D2M3D220M2326N105M6048N5D666M	0.0462098	62.6087	100.505	0.0693147	62.6087	135.105
0b774be2-7e7e-45b0-8b43-3d33b37db5ef.K562.5EU.60.labeled.heat.V;16_chr1:23557000	chr1	+	23557945	23559487	1543	475M1I1M520N77M103N1M2D1M2D361M	0.203254	67.8478	108.535	0.132232	183.169	71.375
NM_000975_000975-1	chr1	+	23691781	23696415	4635	49M779N151M1047N107M746N132M1006N111M435N72M	25.8159	31.4134	81.76	21.7853	24.9891	87.67
NM_000975_000975-3	chr1	+	23691781	23696404	4624	49M779N151M1047N107M746N132M1006N111M435N61M	2.23197	25.2805	70.985	1.25489	27.0104	64.69
NM_000975_000975	chr1	+	23691811	23696404	4594	19M779N151M1047N107M746N132M1006N111M435N61M	1.04982	40.7358	114.23	1.71859	22.1139	97.78
b366b7c5-2178-4f92-a1e3-e32d93bf20dd.K562.5EU.1440.labeled.II;0_NM_000975	chr1	+	23691811	23696415	4605	279M519N151M1047N107M746N132M1006N111M435N72M	2.86692	31.8793	84.655	2.72302	25.1222	60.85
55cdb2f1-e28f-409d-87a7-1e4aa73512f8.K562.5EU.1440.labeled.II;0_NM_000975	chr1	+	23691811	23696415	4605	19M779N151M1047N107M746N129M1009N111M435N72M	1.37913	40.2996	93.875	0.860945	28.7409	94.42
NM_001199802_000975	chr1	+	23691811	23696415	4605	19M782N148M1047N107M746N132M1006N111M435N72M	9.63148	26.9053	76.4	8.57964	24.3176	91.365
d0612bac-274c-41d6-93cd-26b6e6e94a6b.K562.5EU.0.unlabeled.III;0_NM_000975	chr1	+	23691811	23696415	4605	19M782N148M1051N103M746N132M1006N111M435N72M	1.86543	21.496	55.525	1.29788	26.6535	59.14
79b007c6-e897-4181-84b4-21411e46d27c.K562.5EU.0.unlabeled.III;0_NM_000975	chr1	+	23691811	23696415	4605	250M548N151M1047N107M746N132M1006N111M435N72M	3.20993	29.979	66.09	2.93295	28.1921	80.08
NM_000975_000975-2	chr1	+	23691811	23696415	4605	19M779N151M1047N107M746N132M1006N111M435N72M	24.4927	30.4888	81.9625	21.6991	25.6193	80.81
3dcf9008-5e20-4dcb-8916-451cc8704b0d.K562.5EU.1440.labeled.II;0_NM_000975	chr1	+	23691811	23696415	4605	250M551N148M1047N107M746N132M1006N111M435N72M	1.66053	36.8164	48.6775	1.58448	31.2876	69.43
ee84d915-cc40-47fa-af75-7d4d21f77e7f.K562.5EU.60.labeled.IV;0_NM_000975-2	chr1	+	23691813	23696415	4603	947M1047N107M746N1756M	0.184839	62.6087	178.303	0.134125	70.4707	203.04
ee84d915-cc40-47fa-af75-7d4d21f77e7f.K562.5EU.60.labeled.IV;0_NM_000975-3	chr1	+	23691813	23696301	4489	947M1047N107M746N1642M	NA	NA	NA	0.0231049	62.6087	NA
79b007c6-e897-4181-84b4-21411e46d27c.K562.5EU.0.unlabeled.III;0_NM_000975-1	chr1	+	23691863	23696415	4553	198M548N151M1047N107M746N132M1006N111M435N72M	2.76022	31.5649	68.0625	3.61932	24.3439	63.37
39afb5a6-4315-4064-a964-7773ba3f5aa0.K562.5EU.0.unlabeled.II;0_NM_000975	chr1	+	23691863	23696415	4553	227M522N148M1047N107M746N132M1006N111M435N72M	1.95435	34.129	68.81	1.79719	27.5138	58.3
61c84e42-c271-4a4f-9ddd-4e6aa5fbb2f2.K562.5EU.1440.labeled.II;0_NM_003198	chr1	+	23691863	23759895	68033	198M548N151M1047N107M746N132M54229N57M764N107M896N1186M376N112M1581N156M107N98M1382N181M250N112M567N173M2386N384M	0.203254	67.8478	74.225	0.0924196	30.6383	NA
bab39907-73ef-441e-b6cc-47c8666b55e1.K562.5EU.0.unlabeled.I;0_NM_000975	chr1	+	23691863	23696415	4553	198M548N151M1047N985M1006N111M435N72M	0.225612	28.1921	48.41	NA	NA	76.585
203cf002-0a96-487b-bbec-b18418649a31.K562.5EU.1440.labeled.I;0_NM_000975	chr1	+	23691977	23696415	4439	84M548N151M1047N107M746N129M1009N111M435N72M	0.383764	18.2912	115.983	0.310174	36.6657	64.3
b366b7c5-2178-4f92-a1e3-e32d93bf20dd.K562.5EU.1440.labeled.II;0_NM_000975-1	chr1	+	23692025	23696415	4391	65M519N151M1047N107M746N132M1006N111M435N72M	2.22996	33.7199	90.885	2.32152	25.5248	120.225
5472ece8-4f0e-41c8-a134-0111edd6ad65.K562.5EU.1440.labeled.II;0_NM_000975-2	chr1	+	23692512	23695908	3397	248M1047N107M746N129M1009N111M	NA	NA	NA	NA	NA	NA
d935a911-ef72-4d3b-840d-fbd9b4b57087.K562.5EU.60.labeled.IV;0_NM_000975	chr1	+	23692608	23696415	3808	152M1081N73M746N132M1006N111M435N72M	0.938839	26.3128	7.56	0.492857	34.5634	-1
d85b0483-ed2f-4038-9bbd-3b62a783c736.K562.5EU.1440.labeled.III;0_NM_000975	chr1	+	23692608	23696415	3808	152M1047N107M746N106M1032N111M435N72M	0.13412	26.3128	-0.5	0.0549306	38.8778	76
10cda51d-b045-4328-b9ec-5d0d4da22b3d.K562.5EU.0.unlabeled.I;0_NM_000975	chr1	+	23692608	23696415	3808	152M1051N103M746N129M1009N111M435N72M	NA	NA	52.85	0.225612	28.1921	121.45
fa837cb3-77f6-4c24-ae6e-fb136db426a0.K562.5EU.0.unlabeled.II;0_NM_000975	chr1	+	23692608	23696415	3808	152M1047N107M783N95M1006N111M435N72M	0.402359	26.3128	14.18	0.164792	38.8778	-1
ba41ad59-32a4-4f67-b7a3-d18ca7e5692a.K562.5EU.60.labeled.I;0_NM_000975	chr1	+	23692608	23696415	3808	152M1047N107M746N1249M435N72M	0.164792	38.8778	174.325	0.0462098	62.6087	128.2
6146c408-0065-449e-8dc9-68c01b93dff3.K562.5EU.0.unlabeled.III;0_NM_000975	chr1	+	23692608	23696415	3808	152M1900N132M1006N111M435N72M	0.277259	30.6383	21.8075	0.555739	16.3989	30.48
859987ec-8ce7-417c-badb-ee8cebc295cf.K562.5EU.60.labeled.II;0_NM_000975	chr1	+	23692608	23696415	3808	152M1047N107M1884N111M435N72M	NA	NA	NA	NA	NA	NA
33208093-ba6f-42ba-b758-67ea5357b03a.K562.5EU.0.unlabeled.II;0_NM_000975	chr1	+	23692608	23696415	3808	152M1047N107M812N66M1006N111M435N72M	0.179176	23.5914	-0.5	NA	NA	-1
8607f9a1-6786-450f-a943-1b72db681c59.K562.5EU.60.labeled.IV;0_NM_000975	chr1	+	23692608	23696415	3808	152M1047N107M746N132M1552N72M	NA	NA	NA	NA	NA	NA
NM_003198_003198-3	chr1	+	23743445	23762058	18614	134M5442N57M764N107M896N1186M376N112M1581N156M107N98M1382N181M250N112M567N173M2386N2547M	0.609761	67.8478	71.635	0.404099	57.0644	149.185
f1773599-bccf-475d-8d76-9ab67f8edb93.K562.5EU.1440.labeled.II;0_NM_003198	chr1	+	23743482	23759895	16414	97M5442N57M764N107M896N841M155N190M376N112M1581N156M107N98M1382N543M567N173M2386N384M	0.0988514	50.8162	45.93	NA	NA	NA
775841a5-c3e5-4250-85dc-6696ecd4cfb4.K562.5EU.60.labeled.IV;0_NM_003198	chr1	+	23750969	23759895	8927	1062M376N112M1581N156M107N98M1382N181M929N173M2386N384M	NA	NA	60.1	NA	NA	NA
199d1856-420d-4161-aea7-7b0fbe269405.K562.5EU.60.labeled.IV;16_chr1:23760000-1	chr1	+	23760521	23778308	17788	632M3D1M10956N53M101N162M5765N7D108M	0.111125	72.0459	116.76	0.225612	28.1921	55.7
2c6cc413-df11-406f-b9e9-84db5d9536c2.K562.5EU.0.unlabeled.III;16_chr1:23760000	chr1	+	23760521	23778271	17751	632M3D1M10956N55M5D2M3D1M1D96N153M5765N7D71M	0.0425688	86.2938	84.56	NA	NA	NA
6ade3a1c-5206-4077-a981-dc8444481389.K562.5EU.60.labeled.V;16_chr1:23763000	chr1	+	23763489	23764362	874	874M	0.0549306	38.8778	-0.5	NA	NA	NA
882be416-7bfa-4b6f-9678-12473ff21615.K562.5EU.60.labeled.heat.IV;16_chr1:23771000-1	chr1	+	23771558	23778271	6714	326M227N57M5D2M3D1M1D96N153M5765N7D71M	0.0549306	38.8778	NA	0.0462098	62.6087	NA
eb84c178-f155-452f-8a5d-427f263ee59e.K562.5EU.60.labeled.heat.IV;0_NM_020362-2	chr1	+	23778113	23788226	10114	601M1150N78M5733N105M535N109M851N952M	0.0557859	214.086	103.782	0.0796737	122.738	146.9
9993e100-0ca1-479a-92ab-47712b88c4c2.K562.5EU.0.unlabeled.II;0_NM_020362	chr1	+	23778113	23788226	10114	1829M5733N105M535N1912M	0.641968	64.292	111.953	0.579132	48.2418	149.58
NM_020362_020362-1	chr1	+	23778398	23788226	9829	316M724N44M382N78M5733N105M535N109M851N952M	0.532338	54.0377	108.123	0.300364	62.6087	147.7
7e50073f-e494-471d-96a9-6debaa7123c3.K562.5EU.60.labeled.heat.V;0_NM_020362	chr1	+	23778398	23788205	9808	316M724N44M382N78M5733N105M1495N931M	0.0231049	62.6087	NA	0.0231049	62.6087	NA
3b239684-d710-4409-a251-fbe91616c712.K562.5EU.1440.labeled.II;0_chr1:23778000	chr1	+	23778415	23788226	9812	299M6961N105M1495N952M	0.0182322	271.042	-0.5	0.0191788	160.698	126.96
f93d7581-7340-4bf7-8a8a-ad3b4749752d.K562.5EU.1440.labeled.I;0_NM_020362	chr1	+	23778415	23788226	9812	299M6961N105M535N109M851N952M	0.0383576	160.698	74.66	0.152715	46.8654	82.46
3217108f-a4bb-40ae-8e93-0501c13c4d4c.K562.5EU.0.unlabeled.II;0_NM_020362-2	chr1	+	23778415	23788226	9812	1067M382N78M5733N105M535N109M851N952M	0.519356	58.3248	101.47	0.45661	55.1665	112.39
0b621d20-22b3-49ee-913d-604e25b02545.K562.5EU.0.unlabeled.III;0_chr1:23786000	chr1	+	23787841	23788231	391	391M	NA	NA	57.8025	NA	NA	147.37
dec45896-3ee5-4e27-adf3-6a5d9cc7361d.K562.5EU.0.unlabeled.III;0_NM_007260	chr1	+	23791182	23795544	4363	69M1406N104M247N32M111N66M488N48M107N71M132N74M87N377M81N863M	0.201223	115.338	88.0675	0.22632	67.3235	94.595
ff36d562-f1a7-491f-b4dd-a7a9467ec9e8.K562.5EU.60.labeled.IV;0_NM_007260	chr1	+	23791182	23795544	4363	69M1406N104M390N66M488N48M107N71M132N74M87N102M101N174M81N863M	0.0785102	135.208	109.39	0.179176	23.5914	52.27
94bf3adc-fa6e-4564-8f7c-8ed5df2ccea4.K562.5EU.0.unlabeled.I;0_NM_007260	chr1	+	23791182	23795544	4363	69M1406N383M111N66M488N48M107N71M132N1482M	0.241591	75.4874	97.965	0.0999183	120.264	165.97
NM_007260_007260	chr1	+	23791182	23795544	4363	69M1406N104M247N32M111N66M488N48M107N71M132N74M87N102M101N174M81N863M	0.282746	58.6818	59.3275	0.184116	105.022	99.115
e58b5be8-8962-4e66-b11c-d8c884081753.K562.5EU.60.labeled.heat.IV;16_chr1:23795000	chr1	+	23795605	23800869	5265	397M142N1M1D120M243N78M110N83M90N3D72M1I4M92N109M547N177M2D2M245N2I105M389N115M2D154N124M353N71M1275N159M	0.0986869	130.199	29.22	0.200662	35.392	97.555
a5053b08-2f95-4a79-828c-85f49e7eb079.K562.5EU.60.labeled.III;16_chr1:23795000-1	chr1	+	23795605	23800770	5166	397M142N1M1D120M243N78M110N83M90N3D72M1I4M92N109M547N177M2D2M245N2I105M376N3D3M5D118M1D634N68M1275N60M	0.12164	110.437	30.6125	0.0179842	331.995	35.21
81bdee53-1749-4c86-8110-f8c5694548a4.K562.5EU.60.labeled.IV;16_chr1:23795000-1	chr1	+	23795605	23800770	5166	397M142N1M1D120M243N78M110N83M90N3D72M1I4M92N109M547N177M2D2M245N2I105M376N3D3M5D117M2D154N124M353N71M1275N60M	0.45661	55.1665	89.4075	0.195866	78.3609	93.03
fece33a3-cc6c-4335-bd06-768de761548d.K562.5EU.60.labeled.IV;16_chr1:23795000	chr1	+	23795605	23800770	5166	397M142N1M1D120M243N271M90N3D72M1I4M92N109M547N177M2D2M245N2I105M376N3D3M5D117M2D154N124M353N71M1275N60M	0.201223	115.338	110.138	0.210387	91.0784	125.08
3316752a-71e3-4c55-8bad-d9f15d478d8c.K562.5EU.60.labeled.V;16_chr1:23795000-1	chr1	+	23795605	23800770	5166	397M142N1M1D121M7D6M424N76M90N3D72M1I4M92N109M547N177M2D2M245N2I105M376N3D3M5D117M2D154N124M353N71M1275N60M	0.0924196	30.6383	NA	0.146156	33.9811	18.57
683ec7ea-7cac-4d7e-98ab-74a9a4dead61.K562.5EU.60.labeled.IV;16_chr1:23801000-1	chr1	+	23801895	23825492	23598	669M1835N129M2I2M3611N188M2412N60M1D3389N146M2336N86M710N1M1I6M4I110M3D2923N82M3D2M4759N135M	0.839588	34.6636	90.29	1.00442	37.5284	131.38
2927308d-09d7-4769-aaef-10582b99b506.K562.5EU.60.labeled.heat.III;16_chr1:23801000	chr1	+	23801895	23825413	23519	669M1835N129M2I2M3611N178M8351N89M710N1M1I6M4I110M3D2923N82M3D2M4759N56M	NA	NA	NA	0.312537	24.8163	100.79
b0ebf078-1e1e-42e1-a7ff-38f7072d0fed.K562.5EU.60.labeled.heat.II;16_chr1:23845000-1	chr1	+	23845105	23868338	23234	751M218N94M2475N193M5514N1M5D2M1D201M5237N99M3230N1D4M1I140M2219N135M1D2M2271N440M	0.203254	67.8478	48.5175	0.125334	94.2796	166.12
c1b65871-9b66-4c0b-b639-14970ab3839c.K562.5EU.60.labeled.IV;0_NM_017761	chr1	+	23959156	23963450	4295	101M1672N206M305N2011M	0.0729286	271.042	NA	0.0557859	214.086	162.295
88bc473a-19bb-4cab-9ae9-4612632eac67.K562.5EU.0.unlabeled.I;0_NM_017761	chr1	+	23959828	23963450	3623	171M934N202M305N2011M	0.0721542	316.357	114.793	0.0575364	160.698	70.41
NM_017761_017761-3	chr1	+	23959828	23963450	3623	171M930N206M305N2011M	0.440177	119.366	157.015	0.355843	93.3371	153.87
b0c3e11a-f921-4f74-8bec-d84e35b425b8.K562.5EU.0.unlabeled.II;0_NM_017761-2	chr1	+	23959828	23963450	3623	1307M305N2011M	0.557859	99.6364	122.96	0.403124	87.551	162
NM_017761_017761-2	chr1	+	23959862	23963450	3589	137M930N206M305N2011M	0.160693	116.567	105.83	0.0353349	467.806	154.8
5e388a38-8565-49ae-b81e-4a5a8f5c3e48.K562.5EU.60.labeled.IV;16_chr1:23964000-1	chr1	+	23964791	23972971	8181	2933M3849N46M222N3M3D2M1D1122M	0.0775387	147.859	32.775	0.0383576	160.698	NA
98feba4f-27b1-4e8a-a6d2-3704baa55874.K562.5EU.60.labeled.heat.V;16_chr1:23964000-2	chr1	+	23964791	23980315	15525	2931M3614N104M133N54M223N160M2955N1M5D1M1D105M3630N1M1D1M1D104M1373N127M	0.230513	92.8233	121.412	0.175094	49.1253	183.825
c105f7de-c0b7-4e72-8f14-789bc98e6612.K562.5EU.60.labeled.heat.IV;16_chr1:23964000-2	chr1	+	23964791	23976255	11465	2933M3849N54M223N160M2955N1M5D1M1D1283M	0.116766	143.621	178.023	0.0178042	397.408	167.46
28290476-ed9e-4e29-9f67-9caa570fa0a0.K562.5EU.60.labeled.heat.IV;16_chr1:23964000-2	chr1	+	23964791	23975636	10846	2931M4119N5D2M2D160M2955N1M5D1M1D664M	0.0175601	543.791	17.5	0.12164	53.1793	119.935
5f379216-ad6c-451a-b6aa-ee5c7b55d5fc.K562.5EU.0.unlabeled.I;16_chr1:23964000	chr1	+	23964874	23975074	10201	7136M2955N1M5D1M1D102M	0.331456	98.2946	192.145	0.156007	141.51	199.25
c8883c2f-000f-49fc-bd17-949826d78a6c.K562.5EU.0.unlabeled.III;16_chr1:23964000	chr1	+	23964927	23980315	15389	2797M3849N46M222N3M3D2M1D160M2955N1M5D1M1D105M2828N1M1D1M1D364M5D374N163M1373N127M	0.0760081	173.734	97.18	0.0182322	271.042	NA
de72bfc4-9b25-4a32-96f6-2fea77006292.K562.5EU.60.labeled.VI;16_chr1:23966000	chr1	+	23966447	23980315	13869	1277M3849N46M222N3M3D2M1D160M2955N1M5D1M1D105M3630N108M1373N127M	0.0425688	86.2938	NA	NA	NA	NA
0937881e-c5dd-4000-af1a-6de02d7c37bf.K562.5EU.0.unlabeled.II;16_chr1:23964000-1	chr1	+	23966447	23980359	13913	1277M3849N54M223N160M2955N1M5D1M1D105M3630N1M1D1M1D104M1373N171M	0.159347	122.738	61.3325	0.0575364	160.698	119.43
a1cf0fef-26d6-45e5-bb5c-6a16071c1cba.K562.5EU.60.labeled.heat.V;16_chr1:23964000	chr1	+	23966447	23980315	13869	1277M3849N54M223N160M2955N1M5D1M1D105M3630N108M1373N127M	0.0693147	62.6087	NA	NA	NA	188.045
31469945-1659-4ace-a040-e392d57ff94e.K562.5EU.60.labeled.IV;16_chr1:23966000	chr1	+	23966447	23973885	7439	1275M4119N5D2M2D2036M	0.0376972	186.972	37.055	0.0231049	62.6087	NA
c90a2990-06c2-4923-8cb0-b5a9014ce88b.K562.5EU.60.labeled.I;16_chr1:23966000	chr1	+	23966447	23980315	13869	1275M4119N5D2M2D160M2955N1M5D1M1D105M3630N1M1D1M1D104M1373N127M	0.0231049	62.6087	NA	NA	NA	161.07
162f73a1-8a29-416e-9f4d-2e1e0be67f66.K562.5EU.1440.labeled.II;16_chr1:23966000	chr1	+	23966447	23980315	13869	1510M3379N2D102M133N54M223N160M2955N1M5D1M1D105M2828N1M1D1M1D367M1D1M1916N121M	0.0182322	271.042	NA	0.0608198	110.437	146.84
276badb4-955a-4814-bf0a-f60af37d9ef2.K562.5EU.0.unlabeled.II;16_chr1:23966000	chr1	+	23966447	23980277	13831	1277M3849N54M223N160M2955N1M5D1M1D105M2828N1M1D1M1D364M5D374N163M1373N89M	0.0557859	214.086	106.595	0.0182322	271.042	17.56
d1a431e4-ab37-4398-86de-01d63bbff4d4.K562.5EU.60.labeled.heat.IV;16_chr1:23964000-3	chr1	+	23966455	23980372	13918	1269M3849N46M222N3M3D2M1D160M2955N1M5D1M1D105M3630N1M1D1M1D104M1373N184M	0.0191788	160.698	NA	0.0626672	94.2796	122.6
1c0d1ec3-a5c2-406d-ad06-1a57359d5ca7.K562.5EU.60.labeled.IV;0_chr1:23959000	chr1	+	23969083	23970649	1567	1567M	0.0575364	160.698	192.81	0.0191788	160.698	244.96
c1222ae9-d739-477e-a38e-7e66569b343d.K562.5EU.60.labeled.I;16_chr1:23969000	chr1	+	23969095	23980315	11221	2345M133N46M222N3M3D2M1D160M2955N1M5D1M1D105M3630N1M1D1M1D104M1373N127M	NA	NA	NA	0.0202733	110.437	NA
e03c6d38-50c1-4007-8dc3-3851ece4372c.K562.5EU.60.labeled.II;16_chr1:23969000-1	chr1	+	23969095	23980359	11265	2345M133N54M223N160M2955N1M5D1M1D105M3630N1M1D1M1D104M1373N171M	0.0185953	214.086	147.79	0.0191788	160.698	NA
e7987ee9-f1f8-4e1d-8bfa-b72fa6d8b5db.K562.5EU.60.labeled.IV;16_chr1:23969000	chr1	+	23969095	23980315	11221	2345M133N46M222N3M3D2M1D160M2955N1M5D1M1D105M2828N1M1D1M1D364M5D374N163M1373N127M	0.103094	100.711	109.172	NA	NA	NA
249b02e3-5216-493c-bfae-c31509a78dfe.K562.5EU.60.labeled.I;16_chr1:23969000	chr1	+	23969095	23980315	11221	2345M133N46M222N3M3D2M1D160M2955N1M5D1M1D2485M458N1I358M5D374N163M1373N127M	0.0182322	271.042	98.445	0.0231049	62.6087	NA
a7f49816-1ec3-4ba3-b1d2-b244e9dde9c6.K562.5EU.60.labeled.IV;16_chr1:23969000	chr1	+	23969095	23980372	11278	2345M133N54M223N160M2955N1M5D1M1D2485M458N1I358M5D374N163M1373N184M	0.159347	122.738	175.86	0.12334	102.325	248.39
41dbb313-d397-4797-a7ee-c61bbcb10781.K562.5EU.60.labeled.IV;16_chr1:23969000	chr1	+	23969095	23980315	11221	2345M133N54M223N160M2955N1M5D1M1D105M3630N108M1373N127M	0.0178042	397.408	82.9375	NA	NA	NA
38111d27-3398-4780-bb25-f3d0e9595485.K562.5EU.60.labeled.heat.V;0_chr1:24321000	chr1	+	24321955	24323679	1725	1725M	0.0231049	62.6087	2.94	NA	NA	NA
75647944-f2f2-425c-b40c-30eea3f88d3d.K562.5EU.60.labeled.IV;16_chr1:24355000	chr1	+	24357015	24358123	1109	1109M	0.0462098	62.6087	77.585	0.0202733	110.437	NA
NM_020448_020448	chr1	+	24415814	24472971	57158	91M3386N350M20531N69M1814N172M2958N60M4236N146M3781N97M2633N136M2614N89M1504N64M3481N95M4865N3986M	0.081093	110.437	172.445	NA	NA	57.855
73f1de36-8d38-4909-8295-f2b8d6742fd1.K562.5EU.60.labeled.heat.III;0_NM_020448-1	chr1	+	24415814	24466343	50530	91M3386N350M20531N69M1814N172M2958N60M4236N146M3781N97M2633N136M2614N89M1504N64M3481N95M1883N340M	0.0626672	94.2796	31.14	0.0763576	46.8654	110.04
50c2b1ef-48b6-4120-b92b-abf3fcbe7ca9.K562.5EU.60.labeled.VI;0_chr1:24473000	chr1	+	24473041	24476647	3607	3607M	NA	NA	48.69	NA	NA	NA
a7cb4f6b-357f-44e1-9b47-57b3d5edd123.K562.5EU.60.labeled.heat.V;16_chr1:24496000	chr1	+	24496273	24502390	6118	324M3056N61M2636N41M	NA	NA	NA	0.13412	26.3128	NA
8468c20a-94aa-4bf4-bc6f-39c16d2031f1.K562.5EU.60.labeled.IV;0_chr1:24535000	chr1	+	24535421	24541039	5619	5619M	0.0185953	214.086	NA	0.0405465	110.437	NA
096b2688-d00e-4fd7-aef3-7c399835d049.K562.5EU.60.labeled.V;0_NM_001303448	chr1	+	24642945	24673264	30320	403M2636N90M593N123M2069N171M941N2658M284N120M1822N275M5589N2086M4010N111M2197N465M532N1476M586N1083M	0.0174735	626.064	78.9075	0.0185953	214.086	NA
e8f71d2b-3577-47b4-8b05-4d070ad98da7.K562.5EU.60.labeled.heat.V;0_NM_001303448	chr1	+	24643278	24673250	29973	70M2636N90M593N123M2069N171M941N116M1322N204M4D817N195M284N120M1822N269M5595N81M510N87M1263N145M4010N111M2197N465M532N196M1070N210M586N1069M	0.0851376	86.2938	70.55	0.0594458	126.875	165.88
NM_001303448_001303448	chr1	+	24643278	24673264	29987	70M2636N90M593N123M2069N171M941N116M1322N204M4D817N195M284N120M1822N269M5595N81M510N87M1263N145M378N42M3590N111M2197N465M532N196M1070N210M586N1083M	0.188001	94.2796	129.368	0.105193	91.0784	224.95
NM_005839_001303448	chr1	+	24643278	24673236	29959	70M2636N90M593N123M2069N171M941N116M1322N204M4D817N195M284N120M1822N275M5589N81M510N87M1263N145M4010N111M2197N465M532N196M1070N210M586N1055M	0.0763576	46.8654	176.61	0.0191788	160.698	NA
e77f2717-b217-4f12-b1a7-dc2b164eaeac.K562.5EU.60.labeled.IV;0_NM_001303448	chr1	+	24643278	24673264	29987	70M2636N90M593N123M2069N171M941N116M1322N204M4D817N195M284N120M1822N275M5589N81M513N84M1263N145M378N42M3590N111M2197N465M532N196M1070N210M586N1083M	0.241591	75.4874	48.9925	0.12164	53.1793	169.43
c139852d-57b0-48be-8ba3-becb10a261cc.K562.5EU.60.labeled.heat.I;0_NM_001303448	chr1	+	24645984	24673271	27288	90M593N123M2069N171M941N116M1412N114M4D817N195M284N120M1822N269M5595N81M513N84M1263N145M378N42M3590N111M2197N465M532N196M1070N210M586N1090M	NA	NA	159.155	0.0550109	251.634	169.15
58a43060-9227-4507-96b0-6ff5c844dc0a.K562.5EU.60.labeled.IV;0_NM_001303448	chr1	+	24648986	24673196	24211	44M941N116M1322N204M4D817N195M284N120M1822N269M5595N81M1860N145M4010N111M2197N465M532N196M1070N210M586N1015M	NA	NA	NA	NA	NA	NA
795a60ac-70cc-4b88-a23c-4273d262e30c.K562.5EU.60.labeled.heat.V;0_NM_001303448	chr1	+	24649971	24673264	23294	116M1322N204M4D817N195M284N120M1822N275M5589N81M513N84M1263N145M4010N111M2197N465M532N196M1070N210M586N1083M	0.127706	86.2938	142.615	0.0179842	331.995	273.64
07a2ae2a-1a35-434f-a289-43d9b78d7802.K562.5EU.60.labeled.V;0_NM_001303448	chr1	+	24666846	24673254	6409	80M2197N1193M1070N210M586N1073M	0.107799	81.5283	68.39	0.0202733	110.437	NA
NM_013943_013943-1	chr1	+	24745396	24844320	98925	230M52116N110M16242N126M12790N107M12743N182M731N3548M	0.903885	102.693	134.165	0.882217	82.2246	134.5
b5543f31-b6ca-43c3-a151-ec4cb48aa52c.K562.5EU.1440.labeled.II;16_chr1:25222000	chr1	+	25222276	25232490	10215	1155M4010N92M585N115M757N2M5D127M6D2M2974N103M232N50M	NA	NA	70.4375	0.0608198	110.437	122.025
e4a17371-8921-4183-80e6-297268b10628.K562.5EU.60.labeled.I;16_chr1:25222000	chr1	+	25222688	25232490	9803	743M1570N100M2341N91M585N1006M6D2M2974N103M232N50M	0.185953	99.6364	127.81	0.115073	160.698	76.78
664d3abc-cb9f-44ab-a854-8087561ff98b.K562.5EU.0.unlabeled.I;16_chr1:25222000-1	chr1	+	25222688	25232559	9872	743M1570N100M2341N91M585N115M757N2M5D127M6D2M2974N103M232N119M	0.195253	140.246	78.0525	0.154221	154.254	100.42
588bd325-70e2-4ae7-9147-3c76571bdf45.K562.5EU.0.unlabeled.I;16_chr1:25223000	chr1	+	25223049	25232490	9442	382M1570N100M2341N91M585N115M757N2M5D127M6D2M2974N242M95N48M	0.0924196	62.6087	37.19	0.0371906	214.086	45.31
b5dfe49e-0982-4d92-b6be-044377a82849.K562.5EU.60.labeled.I;0_chr1:25232000	chr1	+	25232602	25234775	2174	2174M	0.0202733	110.437	295.905	NA	NA	NA
0e0269c5-0bb1-43b7-9063-9ac25ade70c8.K562.5EU.60.labeled.V;16_chr1:25242000	chr1	+	25242167	25247045	4879	541M2447N3I147M1142N602M	0.0371906	214.086	-0.5	NA	NA	NA
fc18e0ae-4c9c-4050-a4a2-97118cbea788.K562.5EU.60.labeled.VI;16_chr1:25242000	chr1	+	25242264	25247453	5190	150M125N169M847N3I80M1D1M1D4M818N39M651N152M1142N581M275N3D4M1D146M	NA	NA	NA	NA	NA	NA
c99a8b17-6766-4dfb-bdd3-1d415054ad8c.K562.5EU.60.labeled.IV;16_chr1:25242000	chr1	+	25242264	25247453	5190	444M847N3I1747M1142N581M275N3D4M1D146M	0.656657	35.6973	231.835	0.212844	86.2938	142.975
e11f4141-1c2f-49c2-ac90-e77314f55c8f.K562.5EU.60.labeled.heat.V;16_chr1:25241000	chr1	+	25242264	25247453	5190	444M847N3I81M3D3M1513N147M1142N581M275N3D4M1D146M	0.088168	74.4112	63.38	0.241591	75.4874	144.31
3d3b9566-6c91-47cd-a261-1e842d209d00.K562.5EU.60.labeled.heat.III;16_chr1:25242000	chr1	+	25242264	25247453	5190	3038M1142N581M275N3D4M1D146M	0.87889	38.8778	297.185	0.26825	70.4707	166.915
6ba1fc68-4131-4966-ab47-56f32fae9169.K562.5EU.0.unlabeled.II;16_chr1:25242000	chr1	+	25242264	25247453	5190	444M847N3I80M1D1M1D4M818N39M651N152M1142N581M275N3D4M1D146M	0.0202733	110.437	NA	0.0392551	135.208	NA
6a0ea521-cb95-4173-b379-b72b889642b9.K562.5EU.60.labeled.IV;16_chr1:25242000	chr1	+	25242264	25247453	5190	159M106N1M6D172M847N3I81M3D3M1513N147M1142N581M275N3D4M1D146M	NA	NA	NA	NA	NA	NA
cfe818dc-6dd0-44e0-b36a-32c35a045d7a.K562.5EU.60.labeled.I;16_chr1:25242000	chr1	+	25242264	25247453	5190	159M106N1M6D172M847N3I1747M1142N581M275N3D4M1D146M	NA	NA	NA	NA	NA	NA
5603ebd9-cf34-4e06-bdf2-33da338354ae.K562.5EU.60.labeled.IV;16_chr1:25242000	chr1	+	25242264	25247453	5190	444M847N3I944M651N152M1142N581M275N3D4M1D146M	0.328899	59.2428	220.475	0.328899	59.2428	246.745
2fd2a436-f1ba-458e-9c34-8fa6bed54a36.K562.5EU.60.labeled.heat.II;16_chr1:25249000	chr1	+	25249972	25251226	1255	1255M	0.0231049	62.6087	NA	NA	NA	NA
93a11cfc-73f7-49c5-b02f-6baa100ee475.K562.5EU.60.labeled.IV;16_chr1:25262000	chr1	+	25262512	25265629	3118	784M5D2M82N2245M	NA	NA	204.835	0.0191788	160.698	113.94
040f4680-e6ee-4374-a5de-a283a1c5b5e5.K562.5EU.60.labeled.II;16_chr1:25262000	chr1	+	25263361	25264890	1530	1530M	0.0191788	160.698	NA	0.0191788	160.698	90.24
74a81945-6c0a-4806-bb7d-5320ad4b7f0d.K562.5EU.60.labeled.heat.II;0_NM_016124-1	chr1	+	25272420	25329155	56736	276M11877N187M5881N151M10154N148M426N167M1635N138M13540N80M4809N74M6935N258M	0.0462098	62.6087	NA	0.0462098	62.6087	NA
NM_016124_016124-3	chr1	+	25272485	25329155	56671	211M11877N187M5881N151M10154N148M426N167M1635N138M3136N134M10270N80M4809N74M6935N258M	0.184839	30.6383	53.825	0.0763576	46.8654	NA
NM_016124_016124	chr1	+	25272555	25330481	57927	141M11877N187M5881N151M10154N148M426N167M1635N138M3136N134M10270N80M4809N74M6935N1584M	0.0367896	242.092	37.425	0.0626672	94.2796	204.68
5cf58b6e-0b23-42d5-b695-ba98b9753d0a.K562.5EU.60.labeled.V;16_chr1:25293000	chr1	+	25293363	25295287	1925	1925M	NA	NA	NA	0.0231049	62.6087	NA
e3b2cf54-7a9e-42ef-8156-02f6cbcb5128.K562.5EU.60.labeled.V;16_chr1:25302000	chr1	+	25302737	25310754	8018	8018M	NA	NA	NA	0.0462098	62.6087	85.71
22e98925-b846-4a35-a528-c7e88c387eca.K562.5EU.60.labeled.I;16_chr1:25332000	chr1	+	25332614	25337826	5213	3009M1419N785M	0.105193	91.0784	81.185	0.101366	110.437	NA
964a48d9-f8cd-4987-b53f-41455d07199f.K562.5EU.60.labeled.heat.III;0_NM_014313-2	chr1	+	25338297	25360994	22698	160M2017N106M2381N113M8552N68M5099N61M3806N335M	NA	NA	24.7	0.0549306	38.8778	NA
NM_014313_014313-3	chr1	+	25338318	25361128	22811	139M2017N106M2381N113M8552N68M1188N93M3818N61M3806N469M	2.42492	52.1296	97.9675	1.61571	59.877	107.365
520809bc-bbb0-429b-aafe-cf652f0d0adb.K562.5EU.60.labeled.VI;0_NM_014313-3	chr1	+	25338346	25362315	23970	111M2017N106M11046N68M1188N93M3818N61M3806N1656M	0.162186	110.437	80.57	0.0753943	186.972	92.34
b5c38689-b1cd-444c-83ec-6038f086e2a6.K562.5EU.60.labeled.II;0_NM_014313-1	chr1	+	25338346	25362260	23915	111M2017N106M2391N103M8552N68M1188N93M3818N61M3806N1601M	0.278025	84.4588	113.98	0.228379	97.198	NA
12ee7d29-9120-4a9e-84c0-975d1084d781.K562.5EU.0.unlabeled.II;0_NM_014313-1	chr1	+	25338346	25362360	24015	111M13169N68M1188N93M3818N61M3806N1701M	0.280868	80.7967	78.185	0.0951768	171.11	55.165
d0b3c469-48c0-4ee2-80b8-13aa7388a3d6.K562.5EU.60.labeled.heat.II;0_chr1:25338000	chr1	+	25338857	25340806	1950	1950M	NA	NA	NA	0.0231049	62.6087	344.79
85bc2c5d-88e2-429f-82fd-af38e8f91852.K562.5EU.0.unlabeled.III;0_NM_014313	chr1	+	25342964	25362260	19297	110M1904N254M6394N1349M3818N61M3806N1601M	0.143594	103.48	47.05	0.0652885	78.3609	-1
829fcef8-8ccb-4579-a196-c8d0c70baaef.K562.5EU.60.labeled.heat.V;16_chr1:25362000-2	chr1	+	25362246	25420868	58623	310M7913N74M4808N76M10276N1M6D136M3D2M1D3M3127N132M13482N154M2I3M5938N180M1I6M11770N222M	0.0392551	135.208	NA	0.115525	62.6087	NA
104781ec-4f4a-4054-8d67-c8aad25c029f.K562.5EU.60.labeled.IV;16_chr1:25362000-3	chr1	+	25362363	25420924	58562	193M7913N74M4808N76M10276N1M6D136M3D2M1D3M3127N132M1635N171M1078N144M10454N154M2I3M5938N180M1I6M11770N278M	0.749287	37.979	94.945	0.282746	58.6818	88
6f1366dd-a6df-48d3-8236-7f9d8d87e9a1.K562.5EU.1440.labeled.II;16_chr1:25362000	chr1	+	25362371	25420903	58533	185M7913N74M4808N76M13541N1M6D139M1635N171M1078N144M10454N154M2I3M5938N180M1I6M11770N257M	NA	NA	NA	0.0231049	62.6087	NA
NM_018202_001282564-2	chr1	+	25430906	25498725	67820	273M15583N142M1904N127M5324N124M2270N179M1559N502M25223N159M1338N183M3377N121M2116N175M6679N462M	0.273916	49.7405	113.418	0.0924196	62.6087	NA
NM_018202_001282564-1	chr1	+	25431016	25498811	67796	163M15583N142M1904N127M5324N124M2270N179M1559N502M25223N159M1338N183M3377N121M2116N175M6679N548M	0.232863	88.4662	55.82	0.170275	86.2938	119.81
38a4f29f-4396-49bc-a64a-546aafbefaa2.K562.5EU.60.labeled.VI;0_chr1:25508000	chr1	+	25508824	25512732	3909	3909M	0.107799	81.5283	NA	0.0425688	86.2938	30.08
3c5330d6-041a-422e-bd91-4e21fc2465ea.K562.5EU.0.unlabeled.II;0_NM_015627	chr1	+	25562268	25568886	6619	449M353N84M507N131M1381N3714M	0.293178	93.1352	62.115	0.245242	71.1865	147.79
NM_001099627_019557	chr1	+	25819968	25832942	12975	62M2989N110M515N105M2553N110M203N212M2791N213M2090N1022M	0.161734	62.6087	77.1775	0.26824	26.3128	133.77
NM_001099625_019557	chr1	+	25819968	25832942	12975	62M2989N110M515N105M2553N110M203N212M2682N322M2090N1022M	0.708505	43.3339	111.382	0.87889	38.8778	166.25
be0b758d-79b3-41be-9f18-367f4a0a1dec.K562.5EU.60.labeled.heat.IV;0_NM_019557	chr1	+	25821290	25832942	11653	2459M2553N110M203N212M2718N286M2090N1022M	0.134125	70.4707	46.72	0.0178042	397.408	197.655
f5416f4d-9636-4fdd-853a-77ca491ba05d.K562.5EU.60.labeled.heat.II;0_NM_019557	chr1	+	25823183	25832942	9760	566M2553N525M2682N322M2090N1022M	0.127706	86.2938	103.285	0.134125	70.4707	161.75
8042fa23-561a-472e-9677-cac94af5500f.K562.5EU.0.unlabeled.III;16_chr1:25831000-2	chr1	+	25834006	25859451	25446	1834M1563N2M3D143M21721N1D2M3D174M	0.22225	72.0459	121.597	0.670527	24.1751	127.83
43969e85-b0ae-4abc-b92f-d29761863966.K562.5EU.60.labeled.IV;16_chr1:25898000	chr1	+	25898271	25899199	929	929M	NA	NA	NA	NA	NA	NA
2175f5c0-de74-4274-aeec-b00d86c54e50.K562.5EU.60.labeled.heat.V;16_chr1:25900000-2	chr1	+	25900122	25906097	5976	968M403N190M1958N174M1D2M849N75M1197N159M	0.522308	78.3609	110.088	0.852976	48.7269	120.64
8232c07c-8f23-4888-9817-2e12fdd0a5da.K562.5EU.60.labeled.heat.V;16_chr1:25900000-3	chr1	+	25900122	25906448	6327	968M403N190M1958N174M1D2M849N71M1650N61M	9.02351	31.8776	110.665	8.08393	27.4365	117.965
8232c07c-8f23-4888-9817-2e12fdd0a5da.K562.5EU.60.labeled.heat.V;16_chr1:25900000-2	chr1	+	25900122	25906408	6287	968M403N190M1958N174M1D2M849N71M1650N21M	9.32938	29.7257	124.493	7.37197	27.5981	122.26
7d562073-82c3-4340-8980-72d91a1abd41.K562.5EU.1440.labeled.III;16_chr1:25900000-1	chr1	+	25900122	25905050	4929	968M403N190M1958N171M843N2M3D391M	0.437418	76.7798	100.918	0.565493	58.6818	99.78
bccb060e-3dbe-4bef-b34c-85e2eb2b1bf1.K562.5EU.1440.labeled.II;16_chr1:25900000-1	chr1	+	25900139	25906408	6270	951M403N190M1958N171M843N2M3D78M1650N21M	0.804202	38.0411	82.54	0.748031	35.1215	106.075
8e89571f-9c46-4216-aa20-cc06c19d3835.K562.5EU.60.labeled.VI;16_chr1:25900000-2	chr1	+	25900519	25905797	5279	571M403N190M1958N174M1D2M849N71M405N655M	0.813515	51.1745	84.5875	0.490524	60.3648	108.56
27cc271a-aac5-4e14-8046-02f430a07211.K562.5EU.60.labeled.IV;16_chr1:25900000	chr1	+	25900570	25906408	5839	520M403N2322M1D2M849N71M1650N21M	0.496294	58.1207	197.012	0.273916	49.7405	215.13
dc269f9b-8f8d-414e-8453-6d83e00aa185.K562.5EU.60.labeled.heat.IV;16_chr1:25900000	chr1	+	25900570	25906408	5839	520M403N190M1958N168M858N71M1650N21M	0.454046	21.6944	38.54	0.236618	57.8963	125.75
8232c07c-8f23-4888-9817-2e12fdd0a5da.K562.5EU.60.labeled.heat.V;16_chr1:25900000	chr1	+	25900570	25906408	5839	520M403N190M1958N174M1D2M849N71M1650N21M	4.16764	23.4952	94.89	2.63638	24.3296	109.86
8e89571f-9c46-4216-aa20-cc06c19d3835.K562.5EU.60.labeled.VI;16_chr1:25900000	chr1	+	25900570	25906370	5801	520M403N190M1958N174M1D2M849N71M405N1228M	0.272469	66.5373	101.843	0.462098	30.6383	85.3
8232c07c-8f23-4888-9817-2e12fdd0a5da.K562.5EU.60.labeled.heat.V;16_chr1:25900000-1	chr1	+	25900570	25906448	5879	520M403N190M1958N174M1D2M849N71M1650N61M	4.50926	24.8629	95.34	3.84907	23.7975	103.655
bccb060e-3dbe-4bef-b34c-85e2eb2b1bf1.K562.5EU.1440.labeled.II;16_chr1:25900000	chr1	+	25900570	25906408	5839	520M403N190M1958N171M843N2M3D78M1650N21M	0.404074	47.8549	91.28	0.346736	34.8054	-1
46819019-174e-43e1-a44b-dafbc2f3bf47.K562.5EU.0.unlabeled.III;16_chr1:25900000	chr1	+	25900570	25906029	5460	520M403N190M1958N174M1D2M849N71M1113N179M	0.254154	62.6087	72.275	0.261554	43.6881	74.38
07c65e11-4ba4-46ff-989a-b61a90b551d0.K562.5EU.60.labeled.V;16_chr1:25900000	chr1	+	25900570	25906448	5879	520M403N190M1958N163M851N3D80M1650N61M	0.157152	69.3462	85.1525	0.111125	72.0459	94.93
f1ff7d3a-6c42-4097-8c13-70d90c6c4541.K562.5EU.60.labeled.IV;16_chr1:25959000	chr1	+	25959772	25998151	38380	2312M10474N155M2D2M1765N163M2028N1M3D96M5590N113M1468N143M372N76M3702N90M1114N6D157M1125N139M7161N123M	0.0553705	232.654	NA	0.0179842	331.995	69.46
9eb8324e-d141-438e-a452-691f01d5a255.K562.5EU.60.labeled.heat.V;16_chr1:26024000	chr1	+	26024933	26035401	10469	254M2850N81M6774N3M1D4M5D497M	0.0652885	78.3609	36.73	0.0202733	110.437	NA
e3009b0b-a7f3-4594-bcba-9cd6758baac1.K562.5EU.60.labeled.VI;16_chr1:26051000	chr1	+	26051343	26060818	9476	536M2001N3M7D1M1D75M3238N134M1041N1M2D4M3I2M1I234M1642N97M387N70M	0.0549306	38.8778	NA	0.0191788	160.698	NA
NM_152835_152835	chr1	+	26111787	26125538	13752	129M2376N302M7243N3702M	0.139114	124.508	151.515	0.0537546	353.279	131.04
NM_015871_015871-3	chr1	+	26169939	26170869	931	245M234N63M94N295M	4.1749	43.267	90.205	3.39028	43.169	110.93
fa5d8901-844c-455b-91f6-3d887ca82e51.K562.5EU.60.labeled.IV;0_NM_022778	chr1	+	26234231	26278809	44579	80M5451N77M4327N153M10852N695M1731N134M416N114M1356N186M8680N153M824N155M1399N94M913N51M2892N108M1463N226M372N1677M	0.145519	96.572	NA	0.0924196	62.6087	66.98
NM_001319944_022778-1	chr1	+	26234231	26278809	44579	80M5451N77M4327N153M10852N695M1731N134M412N118M1356N186M8680N153M824N155M1399N94M913N51M2892N108M1463N226M375N1674M	0.278025	84.4588	74.2625	0.141913	110.437	181.39
6043ea5b-1dff-4c1d-9612-4529cf7ca288.K562.5EU.60.labeled.heat.III;0_NM_022778	chr1	+	26239762	26260150	20389	77M4327N153M10852N695M1792N73M412N118M1356N534M	NA	NA	NA	NA	NA	NA
4a3768b6-d762-4690-95ad-78751e334011.K562.5EU.60.labeled.IV;0_NM_022778	chr1	+	26258214	26278809	20596	47M1356N186M8680N153M824N155M1399N1058M2892N108M1463N2275M	0.213569	57.3726	203.245	0.240245	41.5581	96.04
1f0fb92f-556b-4696-aa25-1dac79f06ad7.K562.5EU.1440.labeled.II;0_NM_031286-1	chr1	+	26280074	26281520	1447	130M561N163M130N463M	0.822981	17.907	33.225	0.76884	28.5012	87.46
4a6323f7-1788-456b-a402-4908d2da9116.K562.5EU.1440.labeled.II;0_NM_031286	chr1	+	26280095	26281520	1426	109M561N158M135N463M	NA	NA	-0.5	NA	NA	NA
NM_031286_031286-3	chr1	+	26280095	26281520	1426	109M561N168M125N463M	1.92453	23.7975	74.135	3.88341	13.1487	74.31
aba503dc-ab17-4ada-a7bd-2de3b458541a.K562.5EU.60.labeled.IV;0_NM_031286-1	chr1	+	26280095	26281520	1426	109M561N756M	1.71505	20.0798	90.3375	1.75496	27.7782	85.375
NM_001803_001803-2	chr1	+	26317941	26320522	2582	131M2099N352M	1.0731	49.4401	104.19	1.77629	43.8287	95.89
a0a4448d-076c-4046-b9b0-2d0000ddbccc.K562.5EU.60.labeled.IV;16_chr1:26321000	chr1	+	26321862	26336463	14602	196M5D102N158M1826N1M2D162M3898N114M401N150M2615N127M4476N113M130N126M	0.184839	30.6383	49.055	0.358352	23.5914	157.165
NM_205861_001319959	chr1	+	26432344	26471305	38962	33M514N118M5159N117M4446N143M3442N117M1126N102M10130N115M2131N108M8750N2411M	0.22225	72.0459	76.3125	0.365015	37.0074	55.62
48068243-f02c-4428-a23e-9ecdbf5db9f2.K562.5EU.60.labeled.VI;0_NM_001319959	chr1	+	26432344	26448654	16311	33M514N118M5159N117M4446N143M3442N117M1126N102M695N299M	0.0924196	30.6383	61.32	0.0231049	62.6087	NA
24f54016-3f72-461a-9b45-b15955d189a7.K562.5EU.60.labeled.heat.V;0_NM_001319959	chr1	+	26432423	26467523	35101	96M372N118M5159N117M4446N143M3442N117M1126N102M10130N115M2131N108M7148N231M	NA	NA	NA	NA	NA	NA
300bb242-a16d-4fb0-8704-9aba90a9a87f.K562.5EU.60.labeled.heat.III;0_chr1:26447000	chr1	+	26447754	26448567	814	814M	NA	NA	NA	0.0191788	160.698	NA
baf47249-a26c-4b19-9215-769dde16f5d9.K562.5EU.0.unlabeled.III;0_NM_005517-1	chr1	+	26472429	26475913	3485	199M855N45M175N30M352N51M439N93M445N801M	NA	NA	NA	NA	NA	NA
8fea45e1-e8e3-4dc1-be2a-6356b9b8ec07.K562.5EU.60.labeled.V;0_NM_005517	chr1	+	26472429	26476639	4211	199M1944N96M445N1527M	0.379364	70.9338	104.838	0.0753943	186.972	146.36
dcc06375-8005-4bdf-8d63-0e9ad4a074af.K562.5EU.1440.labeled.II;0_NM_005517-2	chr1	+	26472429	26475971	3543	199M855N45M175N30M352N51M977N859M	0.0924196	62.6087	NA	0.0785102	135.208	106.56
8d5b7558-9d03-4f57-8fac-d12bea4e3766.K562.5EU.60.labeled.heat.IV;0_NM_005517	chr1	+	26472429	26475971	3543	199M832N68M175N30M352N51M436N96M445N859M	0.0934459	203.136	88.3175	0.0796737	122.738	84.105
8ff2d93c-8a55-463a-b5cf-36328c72216e.K562.5EU.1440.labeled.II;0_NM_005517-2	chr1	+	26472447	26475971	3525	181M855N45M175N115M267N51M436N96M445N859M	1.91882	46.2314	126.03	1.72906	40.3883	151.12
NM_005517_005517-1	chr1	+	26472447	26475948	3502	181M855N45M175N30M352N51M436N96M445N836M	0.18546	42.3201	NA	0.0828639	98.2946	NA
NM_005517_005517-2	chr1	+	26472447	26475971	3525	181M855N45M175N30M352N51M436N96M445N859M	4.45852	46.0454	113.965	3.73429	41.6344	109.64
69c6ed95-1385-46c6-838a-5477eb3174ec.K562.5EU.60.labeled.heat.I;0_NM_005517-1	chr1	+	26472447	26475971	3525	1286M352N51M436N96M445N859M	0.273042	91.8163	NA	0.277259	62.6087	190.945
c300da55-a50a-4c6c-9d97-9529bd0f212f.K562.5EU.0.unlabeled.II;0_NM_005517-1	chr1	+	26472447	26475971	3525	181M855N45M175N30M352N51M436N96M451N853M	0.0608198	110.437	NA	0.0796737	122.738	NA
5bfa7882-3134-423e-98b0-191db6635555.K562.5EU.0.unlabeled.I;0_NM_005517-1	chr1	+	26472447	26475971	3525	181M855N45M557N51M436N96M445N859M	0.116766	143.621	103.282	0.125334	94.2796	80.78
3b0345b7-e24e-471f-98a2-d4e3cdfcf3b6.K562.5EU.60.labeled.V;0_NM_005517	chr1	+	26472447	26475971	3525	181M855N45M181N24M352N51M436N96M445N859M	0.26825	70.4707	NA	0.15343	76.1027	52.72
NM_005517_005517	chr1	+	26472500	26475971	3472	128M855N45M175N30M352N51M436N96M445N859M	1.92212	57.3726	120.46	1.59136	45.8424	119.63
baf47249-a26c-4b19-9215-769dde16f5d9.K562.5EU.0.unlabeled.III;0_NM_005517	chr1	+	26472500	26475971	3472	128M855N45M175N30M352N51M439N93M445N859M	0.232863	88.4662	132.113	0.210387	91.0784	56.385
8ff2d93c-8a55-463a-b5cf-36328c72216e.K562.5EU.1440.labeled.II;0_NM_005517-1	chr1	+	26472500	26476639	4140	128M855N45M175N115M267N51M436N96M445N1527M	0.829127	77.5285	NA	0.605574	69.596	99.685
49442e10-1286-4bbb-a357-c9d2ebd3c953.K562.5EU.0.unlabeled.II;0_NM_005517	chr1	+	26472500	26475971	3472	128M855N45M175N36M346N51M436N96M445N859M	0.0544192	290.894	85.0925	0.0575364	160.698	165.43
56391e06-8c48-4c47-96ee-c7e63ddf13e1.K562.5EU.60.labeled.V;0_NM_005517	chr1	+	26472500	26475971	3472	128M855N103M117N30M352N51M436N96M445N859M	0.352672	74.4112	117.54	0.398155	59.8368	134.43
NM_005517_005517-3	chr1	+	26472500	26475948	3449	128M855N45M175N30M352N51M436N96M445N836M	0.179176	23.5914	1.85	0.0924196	62.6087	NA
59c81b11-a3d8-424b-9bfd-72b45e6c8ca7.K562.5EU.1440.labeled.I;0_NM_005517	chr1	+	26472500	26475971	3472	128M855N33M187N30M352N51M977N859M	0.0557859	214.086	63.435	0.107799	81.5283	187.81
7b112a05-6ed3-406b-b155-b66119af4e97.K562.5EU.60.labeled.V;0_NM_005517	chr1	+	26472500	26475971	3472	128M855N45M175N433M436N96M445N859M	0.238353	79.7997	NA	0.176336	74.4112	90.89
49b70043-9d18-4f24-94bb-b451e2f1b83b.K562.5EU.60.labeled.heat.IV;0_NM_005517	chr1	+	26472500	26475971	3472	128M1457N51M436N96M445N859M	0.0986869	130.199	169.435	0.0594458	126.875	NA
13cbd4ea-1a43-4805-9854-f1a0334ad985.K562.5EU.0.unlabeled.III;0_NM_005517	chr1	+	26472500	26475971	3472	128M855N653M436N96M445N859M	0.137936	131.627	110.695	0.0361951	300.991	-1
5b6e435e-74f8-4673-b720-6b2cdd2b3309.K562.5EU.60.labeled.heat.I;0_NM_005517	chr1	+	26472500	26475971	3472	128M862N38M175N30M352N51M436N96M445N859M	0.22632	67.3235	NA	0.127706	86.2938	NA
24fcf97b-cb12-434e-8997-c76de47e440e.K562.5EU.60.labeled.V;0_NM_005517-2	chr1	+	26472500	26475971	3472	1028M175N433M436N96M445N859M	0.26825	70.4707	164.85	0.12164	53.1793	NA
13768fde-33aa-49ab-92ab-8df56ca8d13e.K562.5EU.60.labeled.IV;0_NM_005517	chr1	+	26473030	26474959	1930	1106M436N388M	0.0549306	38.8778	NA	0.0202733	110.437	252.69
2b6cf5d2-b9a7-4179-882c-35f2d3a334c6.K562.5EU.60.labeled.IV;0_NM_005517-1	chr1	+	26473237	26475971	2735	291M175N30M352N51M436N96M445N859M	0.230513	92.8233	62.7475	0.145519	96.572	82.33
9b7c0d68-46fd-4dd5-b801-9f96015bfbb2.K562.5EU.60.labeled.VI;0_NM_005517-2	chr1	+	26473358	26475971	2614	778M436N96M445N859M	0.12164	110.437	NA	0.190535	56.7178	240
NM_002953_001006665-3	chr1	+	26529780	26575030	45251	204M6941N45M9897N117M205N82M4126N81M166N80M1667N107M716N38M344N143M412N71M315N89M1028N65M279N103M1706N131M1788N126M193N90M370N159M9785N162M238N77M250N118M930N138M717N952M	0.474764	37.4488	81.235	0.584988	27.7782	52.68
4ea0c9e6-7200-4ae7-9202-ef726bb9283f.K562.5EU.60.labeled.heat.III;0_chr1:26696000	chr1	+	26696041	26698715	2675	2675M	0.0231049	62.6087	NA	NA	NA	NA
NM_006015_139135	chr1	+	26696385	26782103	85719	1156M32110N213M1288N453M1071N117M28063N241M287N90M678N168M653N313M2935N146M90N110M1223N210M3119N208M1173N133M179N176M358N151M83N138M84N97M430N892M356N131M3315N3081M	0.366795	152.567	154.38	0.168302	201.928	142.77
285cc49c-7fc6-4ada-92d8-8096a2e6b63f.K562.5EU.60.labeled.heat.V;0_NM_017837-1	chr1	+	26787959	26798401	10443	31M2769N135M3219N1122M2328N839M	0.369678	30.6383	122.733	0.0851376	86.2938	152.06
79918138-9021-495e-94ec-955fb5f37435.K562.5EU.0.unlabeled.II;0_NM_017837	chr1	+	26787989	26798401	10413	280M2490N135M3219N161M529N432M2328N839M	0.0231049	62.6087	NA	0.0405465	110.437	145
NM_032283_032283	chr1	+	26826700	26855718	29019	440M5307N161M16000N150M1543N138M119N49M522N103M1521N113M860N1993M	0.154221	154.254	97.305	0.0174735	626.064	176.305
4cbb8ad2-1e47-48c9-a190-328b5664e21e.K562.5EU.60.labeled.IV;0_NM_006142	chr1	+	26863749	26864447	699	699M	0.0231049	62.6087	NA	NA	NA	NA
ef84a2a9-2c49-44bb-942c-278ff208ff47.K562.5EU.60.labeled.II;16_chr1:26875000	chr1	+	26876134	26877684	1551	1551M	0.197703	50.8162	65.675	0.12334	102.325	NA
2234c9a7-db3f-40fb-a13b-2291fde41ac3.K562.5EU.0.unlabeled.II;16_chr1:26876000-1	chr1	+	26879392	26890271	10880	355M4408N1M1D1M1D129M1682N168M2835N153M560N586M	0.860945	28.7409	61.79	0.451223	28.1921	30.18
b419739c-7fe5-4982-a74f-2187305c6a85.K562.5EU.60.labeled.heat.III;16_chr1:26890000	chr1	+	26890494	26900460	9967	729M1178N6D134M5D126N119M595N1M2D62M787N172M2890N424M2266N471M	0.0735793	242.092	50.47	0.0763576	46.8654	106.28
936c971c-4d23-4c6b-9736-618d454650c1.K562.5EU.0.unlabeled.I;0_NM_006600	chr1	+	26921734	26946394	24661	196M2159N78M17290N204M92N66M841N117M94N195M2324N84M94N119M243N105M95N265M	1.56609	26.5956	60.7575	1.39102	33.135	73.35
97bc0422-df0c-460f-be98-59daa5217372.K562.5EU.60.labeled.heat.I;0_NM_006600	chr1	+	26921734	26946394	24661	196M2159N78M10082N171M7037N204M92N66M841N117M94N195M2324N84M94N119M443N265M	1.55344	33.7939	78.4875	0.948602	42.8907	73.99
NM_006600_006600	chr1	+	26921768	26946394	24627	162M2159N78M17290N204M92N66M841N117M94N195M2324N84M94N119M443N265M	0.791647	55.4674	74.765	0.656657	35.6973	96.985
87303683-c30d-4edb-bc2d-a3e2b2779a01.K562.5EU.60.labeled.I;0_NM_006600	chr1	+	26921768	26946394	24627	162M2159N78M17290N204M92N66M841N117M94N195M2324N84M656N265M	0.0231049	62.6087	NA	NA	NA	NA
f7fdc199-f1e6-45ab-a219-c48a6b06602d.K562.5EU.60.labeled.II;0_NM_006600	chr1	+	26921768	26946394	24627	162M2159N78M17290N204M92N66M3571N84M94N119M443N265M	0.0202733	110.437	NA	NA	NA	NA
f28a2b96-1162-42b0-91b0-d8251e06dcd2.K562.5EU.60.labeled.IV;0_NM_006600	chr1	+	26921768	26946394	24627	162M2159N78M17290N204M92N66M838N120M94N195M2324N84M94N119M443N265M	0.474764	37.4488	22.9925	0.164792	38.8778	NA
b50ae8e7-4c1e-4bfb-89e5-7d1424b2b7ce.K562.5EU.60.labeled.III;0_NM_006600	chr1	+	26921768	26946394	24627	162M2159N78M18493N117M94N195M2324N84M94N119M443N265M	0.150345	82.888	63.2675	0.359437	27.5138	38.13
NM_006600_006600-2	chr1	+	26921797	26946394	24598	133M2159N78M17290N204M92N66M841N117M94N195M2324N84M94N119M443N265M	0.471598	50.1936	45.38	0.251403	48.448	NA
b36d7703-8a45-4d7f-a4e9-2b80eb1c13b9.K562.5EU.60.labeled.heat.V;0_NM_006600	chr1	+	26924123	26946304	22182	44M17290N1609M2324N84M94N119M443N175M	NA	NA	NA	0.0924196	30.6383	NA
f2fc74f4-1d50-4302-b474-02e099d34bb4.K562.5EU.60.labeled.heat.II;0_NM_006600	chr1	+	26942677	26946394	3718	120M74N195M2324N84M94N119M443N265M	0.088168	74.4112	29.185	0.111125	72.0459	40.36
93e9eb95-abd6-4af9-9a38-34362586a5db.K562.5EU.1440.labeled.II;0_NM_006600	chr1	+	26942758	26946394	3637	19M94N195M2324N297M443N265M	0.0924196	30.6383	NA	NA	NA	41
6919c78d-23c5-4833-b107-7466305b3c76.K562.5EU.60.labeled.heat.II;0_NM_006600	chr1	+	26943902	26946394	2493	1572M94N827M	0.0202733	110.437	NA	0.295079	41.0724	191.9
f6c0aa03-acd3-43e7-9b8a-9c3b41665b30.K562.5EU.60.labeled.IV;16_chr1:26949000	chr1	+	26949565	26960467	10903	590M530N72M585N1074M1D7936N115M	0.0693147	62.6087	NA	NA	NA	NA
dce027c3-a5c8-41b5-b2a6-7f02ee84456e.K562.5EU.0.unlabeled.I;16_chr1:27005000	chr1	+	27005022	27006545	1524	1524M	NA	NA	NA	NA	NA	NA
0ede149a-bc11-4892-9ad4-390ec80d6773.K562.5EU.60.labeled.IV;16_chr1:27098000	chr1	+	27098852	27155111	56260	1791M552N1M4D1M2D67M448N2D3M1I105M1D188N110M251N2D2M1D179M114N68M476N3D88M2571N1M1D205M2D3M1558N213M1656N5D253M5D1M1I2M4044N454M39696N1131M	0.203254	67.8478	-0.5	0.0924196	30.6383	NA
NM_001276252_001276252	chr1	+	27234705	27308243	73539	247M26004N147M2049N84M19003N47M1052N112M4224N188M4353N183M1624N95M397N116M1696N76M646N109M781N174M3114N236M2159N175M1205N193M992N2058M	0.272469	66.5373	91.44	0.0753943	186.972	119.47
NM_001276252_001276252-1	chr1	+	27234736	27308562	73827	216M26004N147M2049N84M19003N47M1052N112M4224N188M4353N183M1624N95M397N116M1696N76M646N109M781N174M3114N236M2159N175M1205N193M992N2377M	0.190301	88.9495	87.96	0.162186	110.437	114.5
NM_032125_037576	chr1	+	27322247	27336399	14153	145M8328N85M1265N32M1856N97M96N131M1097N1021M	0.277259	62.6087	88.13	0.0967042	150.411	75.15
NR_037576_037576	chr1	+	27322278	27336399	14122	114M8328N85M180N153M932N32M1856N97M96N131M1097N1021M	0.0785102	135.208	100.347	0.111125	72.0459	139.37
NR_037577_037577	chr1	+	27322316	27336399	14084	76M8328N85M1265N32M1856N97M96N131M385N88M624N1021M	0.0988514	50.8162	123.51	0.0652885	78.3609	44.155
190a83a1-e0c8-475c-9acd-8bdac2527e13.K562.5EU.60.labeled.heat.II;0_chr1:27324000	chr1	+	27324449	27329672	5224	5224M	NA	NA	NA	0.0202733	110.437	179.96
6b572824-771b-4062-a1f2-fbe2c01c47d4.K562.5EU.60.labeled.heat.I;0_NR_037576	chr1	+	27333977	27336399	2423	78M96N2249M	0.0392551	135.208	58.07	0.0626672	94.2796	166.25
b664d127-cf8c-4622-aab4-e50279ba554a.K562.5EU.1440.labeled.II;16_chr1:27355000	chr1	+	27355179	27358326	3148	292M5D551N73M1D1M287N113M1D88N159M259N102M285N180M134N166M304N147M	NA	NA	NA	NA	NA	NA
8e9ad192-dc2a-4c99-9b54-1dff4fad1f18.K562.5EU.60.labeled.IV;16_chr1:27355000	chr1	+	27355179	27358230	3052	293M3D1M196N75M3D2M277N71M1D1M287N113M1D88N159M259N102M285N180M134N166M304N51M	NA	NA	45.3	NA	NA	NA
85ce707b-89a4-4111-bdfc-b6e89b202f3e.K562.5EU.60.labeled.heat.I;0_chr1:27394000	chr1	+	27395224	27396884	1661	1661M	0.164792	38.8778	198.135	0.0231049	62.6087	NA
c8e2b859-4d22-4c6f-b068-9acc496aa75d.K562.5EU.60.labeled.IV;16_chr1:27404000-1	chr1	+	27404232	27490171	85940	4117M1D1344N509M2355N3M9D1M1D155M1I4M2106N127M1021N114M2163N3D152M528N5M2D1M1D135M1I3M9673N167M61052N188M	0.880054	104.771	84.305	0.998724	61.5128	85.96
73d02f17-f95f-4e8b-8220-a20fa72019d6.K562.5EU.60.labeled.IV;0_chr1:27525000	chr1	+	27525760	27530717	4958	126M4400N432M	0.152715	46.8654	83.48	0.179176	23.5914	93.36
dda12e5a-444b-42d8-9f9a-8c3d5956a07e.K562.5EU.60.labeled.II;16_chr1:27534000	chr1	+	27534273	27603910	69638	645M2D3M12342N4924M1I3M852N1M1I6M2I22M1I1M1I111M5112N7D230M1I1M176N174M1D44512N94M231N5D183M	0.144551	54.7527	98.5	0.0549306	38.8778	52.365
bff98b15-b0df-428c-b7d6-d7739566233b.K562.5EU.60.labeled.heat.II;16_chr1:27666000	chr1	+	27666070	27672181	6112	407M1D1749N146M79N3D79M709N102M2773N3D61M	0.109861	38.8778	60.69	0.346736	34.8054	150.23
NM_177424_177424	chr1	+	27773233	27824441	51209	193M16136N70M3901N100M8045N138M8430N44M1873N106M5582N73M1726N83M2498N2211M	0.375702	128.623	96.3875	0.383652	113.013	123.67
7fb56a4a-a1eb-4c06-8ceb-cbd1fe4ae2d6.K562.5EU.60.labeled.heat.I;0_NM_177424	chr1	+	27773233	27821168	47936	193M16136N70M3901N100M8045N138M10347N106M5582N3318M	0.115525	62.6087	77.63	0.0851376	86.2938	330.77
ce95f372-f4fc-4c36-ad45-0069c5b2d622.K562.5EU.60.labeled.V;0_NM_177424	chr1	+	27773233	27801927	28695	193M16136N70M3901N100M8051N244M	0.0231049	62.6087	NA	NA	NA	128.52
f990270e-006f-460e-a744-a63432817921.K562.5EU.60.labeled.heat.I;0_chr1:27773000	chr1	+	27773270	27774041	772	772M	NA	NA	NA	0.0231049	62.6087	336.43
43062a46-3aec-4f4d-9c98-787efd5a5a28.K562.5EU.60.labeled.heat.V;0_NM_177424	chr1	+	27793565	27820341	26777	68M8045N138M8430N44M1873N106M5582N73M1726N83M163N446M	NA	NA	NA	NA	NA	NA
NM_014110_138558-2	chr1	+	27830798	27851677	20880	94M1864N61M5882N154M2161N221M1951N145M3697N65M3000N1585M	0.803674	63.9553	128.778	0.333375	72.0459	66.04
2385d122-aeb6-433b-ad5a-5a02e57b7abc.K562.5EU.60.labeled.I;0_NM_138558	chr1	+	27830825	27851523	20699	67M1864N61M5882N154M2161N221M1951N145M3697N65M3003N1428M	0.184839	62.6087	60.8225	0.152715	46.8654	NA
5764b10f-61d1-42a6-ae76-cf7c3bb0e1d8.K562.5EU.1440.labeled.II;0_chr1:27830000	chr1	+	27830826	27831542	717	717M	0.0549306	38.8778	NA	NA	NA	NA
NM_001105556_001105556	chr1	+	27872549	27886674	14126	117M3922N141M2915N411M1916N1073M2251N157M415N808M	0.219722	38.8778	NA	0.190535	56.7178	96.52
aa905f1c-5a55-4058-b524-af0e9363a3c1.K562.5EU.60.labeled.IV;16_chr1:27891000	chr1	+	27891540	27914549	23010	707M1764N94M180N3D110M2607N117M511N70M9217N3D114M140N2M1I104M6780N106M1D2M263N115M	0.80086	71.7833	102.78	0.657799	59.2428	120.58
077e0f9a-c000-4996-8f3c-f9481f0680dd.K562.5EU.60.labeled.heat.I;16_chr1:27891000	chr1	+	27891540	27914743	23204	707M1764N94M180N3D110M2607N117M511N70M9217N3D114M140N2M1I104M6631N2I255M1D2M263N309M	0.471456	69.3462	117.317	0.588706	46.1762	95.415
96939fd9-4dc8-4420-93e9-848fd4393a44.K562.5EU.0.unlabeled.I;16_chr1:27891000	chr1	+	27891540	27914549	23010	707M1764N94M180N3D110M2607N117M511N70M9217N3D114M140N2M1I100M6784N106M1D2M263N115M	0.0185953	214.086	33.645	0.150345	82.888	52.325
a003a521-90e1-466f-8407-a2aa0770f83d.K562.5EU.60.labeled.heat.V;16_chr1:27891000	chr1	+	27891540	27914718	23179	707M1764N94M180N3D110M2607N117M511N70M9217N3D114M140N2M1I104M6780N107M2D455N92M	0.12334	102.325	77.665	0.180197	68.5032	103.45
71b5dd2f-ef55-4820-a8bd-370588e84707.K562.5EU.0.unlabeled.III;16_chr1:27891000-1	chr1	+	27891540	27914718	23179	707M1764N94M180N3D110M2607N114M9801N3D3M2D109M140N2M1I104M6780N106M1D2M263N284M	0.329584	38.8778	110.18	0.13412	26.3128	NA
b642b6f0-0c05-4cf5-b283-31e28a2e9272.K562.5EU.60.labeled.IV;16_chr1:27891000	chr1	+	27891540	27914549	23010	707M1764N94M180N3D110M2607N117M511N70M9217N3D114M140N2M1I104M6780N108M1D251N127M	0.117765	135.208	97.45	0.164792	38.8778	87.62
aa905f1c-5a55-4058-b524-af0e9363a3c1.K562.5EU.60.labeled.IV;16_chr1:27891000-3	chr1	+	27891548	27914580	23033	699M1764N94M180N3D110M2607N117M511N70M9217N3D114M140N2M1I104M6780N106M1D2M263N146M	0.763576	46.8654	123.123	0.56252	52.3578	99.3
980e9e7f-5b57-4e3a-820c-eb1508f5f8dd.K562.5EU.60.labeled.V;16_chr1:27970000	chr1	+	27970347	28088556	118210	4197M3825N2M2D96M10057N3D130M5D3M1035N108M3588N165M1D4M3758N55M2581N87M4286N85M6527N143M2024N170M3858N10M1D87M10549N133M7614N3M3D139M12702N42M9567N104M1D30428N32M	0.26825	70.4707	149.803	0.170275	86.2938	177.655
5c915fb5-69b8-45ed-9a51-09daebd1a7d0.K562.5EU.60.labeled.IV;16_chr1:27988000	chr1	+	27988470	28088609	100140	189M5D3M1035N108M3588N165M1D4M3758N55M2581N87M4286N85M6527N143M2024N170M3858N10M1D77M18306N1I2M1D3M2I139M3158N67M3665N80M5732N42M9567N104M1D30428N85M	0.405557	22.5668	46.1075	0.13412	26.3128	NA
a588d194-707f-4da5-8c77-9cdd2ddc8078.K562.5EU.0.unlabeled.II;0_chr1:28172000	chr1	+	28172998	28173109	112	112M	NA	NA	NA	0.13412	26.3128	NA
1948976f-ed86-4c8a-a872-11862147cf91.K562.5EU.60.labeled.IV;16_chr1:28200000-1	chr1	+	28200308	28232993	32686	1067M2376N71M1435N92M3D4M2989N69M1560N2I93M504N64M4297N2M4D1M1D59M4D13921N83M3898N13M4D72M	0.272469	66.5373	79.505	0.195866	78.3609	94.825
504cc393-7637-4475-91cf-93167c1f5823.K562.5EU.1440.labeled.II;16_chr1:28200000	chr1	+	28200553	28232993	32441	822M2376N71M1435N92M3D4M2989N69M1560N2I93M504N64M4297N2M4D1M1D59M4D13921N96M3886N88M	0.144551	54.7527	97.14	0.165728	98.2946	84.56
d795d30e-3ad3-48ee-8b5d-298477e7fa6b.K562.5EU.1440.labeled.II;16_chr1:28200000	chr1	+	28200553	28233017	32465	822M2376N71M1435N92M3D4M2989N67M2157N66M4297N2M4D1M1D59M4D13921N93M3896N2M1D102M	0.12334	102.325	22.555	NA	NA	NA
bba29de1-4bc4-4e0c-9ceb-b52403d16a31.K562.5EU.60.labeled.II;16_chr1:28200000	chr1	+	28200553	28232993	32441	822M2376N71M1435N92M3D4M2989N2290M4297N2M4D1M1D59M4D13921N93M3896N2M1D78M	0.206189	100.711	91.425	0.480489	41.5581	113.42
ed9e7bad-f3f9-4a3f-ba0a-ea912d153048.K562.5EU.1440.labeled.II;16_chr1:28200000	chr1	+	28200553	28232993	32441	822M2376N71M1435N92M3D4M2989N64M6523N3M3D61M4D17920N71M	0.0173426	812.892	73.325	0.115525	62.6087	156.96
80d8a2e8-c1aa-4a10-b7c0-3dfbd612e222.K562.5EU.60.labeled.heat.III;16_chr1:28200000	chr1	+	28200553	28232993	32441	822M2376N71M1435N92M3D4M2989N67M2157N66M4297N2M4D1M1D59M4D13921N98M1107N123M2668N74M	0.240245	41.5581	98.34	0.0191788	160.698	85.91
e5b656d3-c2a6-4a6f-adb7-08041fa0e255.K562.5EU.0.unlabeled.III;16_chr1:28200000	chr1	+	28200553	28232993	32441	822M2376N71M1435N92M3D4M2989N69M1560N2I93M504N64M4297N2M4D1M1D59M4D13921N83M3896N12M1D78M	0.784892	37.1415	116.438	0.277259	62.6087	115.17
fbfa8985-475a-4917-9836-1f244341435b.K562.5EU.60.labeled.heat.IV;16_chr1:28200000	chr1	+	28200553	28233017	32465	822M2376N71M1435N3155M2157N66M4297N2M4D1M1D59M4D13921N93M3896N2M1D102M	0.18546	42.3201	26.96	0.105193	91.0784	NA
e5b656d3-c2a6-4a6f-adb7-08041fa0e255.K562.5EU.0.unlabeled.III;16_chr1:28200000-3	chr1	+	28200579	28233017	32439	796M2376N71M1435N92M3D4M2989N69M1560N2I93M504N64M4297N2M4D1M1D59M4D13921N83M3896N12M1D102M	1.00515	55.8758	98.47	0.988751	38.8778	120.275
61a67419-a414-44d6-862a-0f6cf0e0a717.K562.5EU.60.labeled.heat.V;16_chr1:28200000	chr1	+	28200579	28232993	32415	796M2376N71M1435N50M27614N73M	NA	NA	60.105	0.0202733	110.437	71.93
ddff20d5-ea47-43cb-b5bb-98de7a0fb5ba.K562.5EU.1440.labeled.I;16_chr1:28200000	chr1	+	28200579	28232993	32415	796M2376N73M1D2M4518N67M2157N66M4297N2M4D1M1D59M4D13921N93M3896N2M1D78M	0.0405465	110.437	20.54	0.0202733	110.437	57.685
756ae351-6173-47c1-871d-ad302e905748.K562.5EU.60.labeled.heat.I;16_chr1:28200000	chr1	+	28200579	28232993	32415	796M2376N71M1435N93M4624N2I93M504N64M4297N2M4D1M1D59M4D13921N83M3896N12M1D78M	0.0202733	110.437	NA	0.0462098	62.6087	123.08
400162fd-96d4-45c0-a35d-3d07078b20b4.K562.5EU.60.labeled.heat.II;16_chr1:28200000	chr1	+	28200579	28232993	32415	796M2376N71M1435N92M3D4M2989N69M1560N2I93M504N64M4297N2M4D1M1D59M4D13921N98M1107N123M2668N74M	0.329584	38.8778	83.125	0.369678	30.6383	181.93
e9f40724-b6f7-4602-920a-4e770b732abe.K562.5EU.60.labeled.IV;16_chr1:28234000	chr1	+	28234084	28234494	411	411M	0.0185953	214.086	12.405	NA	NA	NA
e25411cd-31f6-4824-863c-d36f0fe883eb.K562.5EU.1440.labeled.II;0_chr1:28236000	chr1	+	28236135	28246906	10772	318M10136N318M	NA	NA	NA	NA	NA	NA
NM_016311_178190-1	chr1	+	28236135	28238043	1909	136M90N92M1384N207M	0.831777	20.2817	69.595	0.207027	44.8818	108.09
246828a5-30ee-4859-a808-35dc435dbdb6.K562.5EU.60.labeled.heat.I;0_NM_178190-2	chr1	+	28236135	28238098	1964	136M90N92M1391N255M	0.0924196	62.6087	NA	0.175094	49.1253	-1
NM_178191_178190-1	chr1	+	28236135	28238098	1964	136M90N1738M	2.89196	47.2822	61.505	2.79385	34.2907	92.085
NM_016311_178190-3	chr1	+	28236135	28238098	1964	136M90N92M1384N262M	3.87064	39.5595	77.33	3.02351	31.1502	87.425
NM_178190_178190-3	chr1	+	28236135	28238098	1964	136M90N92M1308N338M	5.90861	39.6584	84.0575	4.60607	33.7283	95.445
NM_016311_178190	chr1	+	28236166	28238098	1933	105M90N92M1384N262M	1.47857	34.5634	63.25	1.39102	33.135	100
b972f97d-1d30-4ab9-911f-c1c09616f728.K562.5EU.1440.labeled.I;0_NM_178190	chr1	+	28236166	28238098	1933	105M90N92M1317N329M	1.36238	43.5042	74.775	1.13723	32.4076	113.035
NM_016311_178190-2	chr1	+	28236166	28238043	1878	105M90N92M1384N207M	0.277259	20.2817	6.99	NA	NA	51.635
NM_178191_178190-2	chr1	+	28236166	28238098	1933	105M90N1738M	0.957845	51.7256	70.3075	0.985351	36.7927	91.87
69dea37f-c096-4a71-bef2-ac611f4bf981.K562.5EU.1440.labeled.I;0_chr1:28236000	chr1	+	28236166	28238098	1933	105M1566N262M	NA	NA	NA	0.12164	53.1793	-1
44ec96c0-3100-4a37-8eeb-93c04fd68dd5.K562.5EU.1440.labeled.III;0_chr1:28236000	chr1	+	28236166	28238043	1878	287M1243N348M	NA	NA	NA	NA	NA	NA
d7713a2a-7bde-41be-bf13-dac7f5c98525.K562.5EU.60.labeled.IV;16_chr1:28239000	chr1	+	28239511	28247201	7691	1119M5946N626M	0.120172	118.619	214.06	0.0568456	178.123	114.19
1f1116e6-9bc0-45d6-a813-85421aebdefb.K562.5EU.60.labeled.heat.I;0_NM_031459	chr1	+	28259515	28282494	22980	423M9245N66M3332N213M1246N119M666N191M4081N3398M	0.392332	43.6881	81.13	0.277259	62.6087	180.28
NM_031459_031459-2	chr1	+	28259515	28282494	22980	423M9245N66M2425N198M412N183M114N213M564N151M531N119M666N191M4081N145M1474N1779M	1.3997	31.3721	80.46	0.329584	38.8778	53.265
e643fcac-9b8d-4c0a-8e04-8241ec098d23.K562.5EU.60.labeled.heat.I;0_NM_031459	chr1	+	28259515	28282494	22980	423M9251N60M2425N198M412N183M114N213M564N151M531N119M666N191M4081N145M1474N1779M	0.22632	67.3235	41.325	0.12334	102.325	141.06
NM_017638_017638	chr1	+	28329044	28335964	6921	137M1416N139M3681N1548M	0.278025	84.4588	124.53	0.295551	66.235	109.19
NM_001127350_001127350	chr1	+	28329074	28335964	6891	51M1472N139M3681N1548M	0.0191788	160.698	-0.5	0.0924196	62.6087	NA
953676b3-171f-4d49-b5d8-6b2fcef1f01e.K562.5EU.60.labeled.heat.V;16_chr1:28346000	chr1	+	28346059	28346322	264	264M	NA	NA	NA	NA	NA	NA
98634d63-a43e-4702-972e-5d7b696bf3e5.K562.5EU.60.labeled.II;16_chr1:28505000	chr1	+	28505209	28505886	678	678M	NA	NA	NA	NA	NA	NA
NR_002909_036473	chr1	+	28505996	28509633	3638	89M2043N33M669N804M	1.11031	356.76	208.088	0.410802	374.118	158.15
NR_036473_036473	chr1	+	28506063	28509633	3571	22M135N108M4D1796N33M669N804M	0.167358	214.086	175.352	0.0887262	424.937	161.7
e1eddce7-f417-41b9-8d31-629374f3500d.K562.5EU.60.labeled.heat.II;0_NM_001048194	chr1	+	28506063	28538989	32927	22M2043N33M669N76M7819N1584M11549N82M583N51M1229N188M180N180M2699N97M111N123M490N156M235N120M365N153M932N1158M	0.404099	57.0644	NA	0.184116	105.022	72.88
d7c1dedc-5c79-4fae-aeb3-5b45dcf2ccd2.K562.5EU.60.labeled.heat.V;0_NR_036473	chr1	+	28506063	28516870	10808	22M2043N33M669N2362M5533N146M	0.64473	238.034	184.553	0.104618	669.808	201.715
d6dba5f2-a6e8-4f93-9b29-a5e11e145aeb.K562.5EU.60.labeled.VI;0_NR_036473	chr1	+	28506063	28510892	4830	22M2043N33M669N76M1743N244M	NA	NA	NA	0.0231049	62.6087	NA
NR_030725_001048194	chr1	+	28506063	28538989	32927	22M2043N33M669N76M7819N143M12990N82M1863N188M180N180M2699N97M111N123M490N156M235N120M365N153M932N1158M	0.12334	102.325	14.9475	0.0608198	110.437	NA
95a66d61-9226-4a3e-b0e5-18fbbf76194d.K562.5EU.60.labeled.heat.V;0_NR_036473	chr1	+	28506063	28509633	3571	38M2007N53M669N804M	0.0951768	171.11	124.255	0.0537546	353.279	132.23
5c83679a-7a07-4f97-ae39-f0f976d7b067.K562.5EU.0.unlabeled.I;0_NM_001048199	chr1	+	28506063	28509633	3571	22M2043N1506M	0.184698	230.779	116.095	0.0934459	203.136	164.7
0a94281c-f07d-4755-8c8b-7f1aaaf7f63d.K562.5EU.0.unlabeled.I;0_NR_036473-2	chr1	+	28507381	28509633	2253	780M669N804M	0.112542	195.914	55.8875	0.0562711	195.914	44.92
51c48e60-e84b-4067-989a-a96fe8fd6153.K562.5EU.0.unlabeled.I;0_chr1:28508000	chr1	+	28508127	28509633	1507	34M672N801M	0.115073	160.698	9.9875	0.0356084	397.408	131.88
d82583da-27d0-460b-9c78-9cc01c9a61c0.K562.5EU.60.labeled.I;0_NM_001048194	chr1	+	28508127	28538989	30863	34M669N72M7823N143M12990N82M583N51M1229N188M180N180M323N84M2292N97M111N123M490N156M235N120M365N153M932N1158M	0.203254	67.8478	89.9725	0.0652885	78.3609	-1
c4d37a6e-b492-44af-bae9-7844670533b0.K562.5EU.60.labeled.heat.I;0_NM_001048194	chr1	+	28508127	28538989	30863	34M669N76M20952N82M1863N188M180N180M2699N97M111N123M490N156M235N120M365N153M932N1158M	0.218709	76.7798	11.395	0.0626672	94.2796	NA
b12d67cc-d977-410a-8577-debf40c61713.K562.5EU.60.labeled.heat.III;0_NR_036473	chr1	+	28508127	28509633	1507	34M669N72M522N210M	NA	NA	NA	NA	NA	NA
0744a62c-eab6-422f-99b2-ca43a1506cd3.K562.5EU.60.labeled.IV;0_NM_001048194	chr1	+	28508127	28539083	30957	34M669N76M7819N143M12990N82M583N51M1229N188M180N180M2699N97M111N123M490N156M235N120M365N153M932N1252M	0.180957	115.884	111.075	0.184839	62.6087	169.395
0d9eabf2-75e4-4afe-adea-d26ef26190f3.K562.5EU.60.labeled.IV;0_chr1:28513000	chr1	+	28513008	28514904	1897	1897M	0.0462098	62.6087	NA	NA	NA	NA
NM_001269_001048194-1	chr1	+	28518245	28538989	20745	64M11549N82M1863N188M180N180M2699N97M111N123M490N156M235N120M365N153M932N1158M	0.244915	106.373	99.08	0.207027	44.8818	87.27
6279d57d-e44e-4256-b32c-8976409e4e6b.K562.5EU.0.unlabeled.I;0_chr1:28540000	chr1	+	28540051	28541768	1718	1718M	NA	NA	NA	NA	NA	NA
80f6a8cf-cf70-44c9-8a91-ba80db516611.K562.5EU.60.labeled.V;0_NM_017846	chr1	+	28551871	28577759	25889	1867M6895N100M135N531M3304N132M2459N120M3762N163M528N34M5599N260M	0.218709	76.7798	125.64	0.40482	40.4887	130.515
NM_017846_017846-1	chr1	+	28553041	28577731	24691	97M502N98M6895N100M613N53M3304N132M2459N120M3762N163M528N34M5599N232M	0.0924196	30.6383	NA	0.13412	26.3128	NA
NM_017846_017846	chr1	+	28553108	28577759	24652	30M502N98M6895N100M613N53M3304N132M2459N120M3762N163M528N34M5599N260M	0.0924196	30.6383	46.52	NA	NA	NA
a6dad6bc-cc65-4b1c-bbba-85b0b1172555.K562.5EU.60.labeled.heat.I;0_NM_017846-1	chr1	+	28553108	28577759	24652	30M502N98M6895N100M613N53M3304N132M2459N120M3762N163M528N34M2688N130M2781N260M	0.144551	54.7527	105.532	0.277259	20.2817	181.48
32a90ceb-2e15-4ae7-a087-b4906d6a4d62.K562.5EU.60.labeled.VI;0_NM_017846	chr1	+	28553284	28577759	24476	454M6895N100M380N148M85N53M3304N132M2459N120M3762N163M528N34M5599N260M	0.0924196	30.6383	NA	0.0202733	110.437	NA
f877659b-61b0-47e0-b2dc-f040fd49ed98.K562.5EU.0.unlabeled.II;16_chr1:28576000-2	chr1	+	28576738	28579788	3051	1942M852N257M	0.0191788	160.698	32.4525	0.0392551	135.208	121.84
ee813c53-d7be-4a6c-9259-74a0aa72a790.K562.5EU.60.labeled.heat.IV;0_chr1:28576000	chr1	+	28578540	28579358	819	819M	0.227023	21.6944	NA	NA	NA	NA
70435d7f-7a62-47e5-a78a-4d2ac812c6de.K562.5EU.60.labeled.IV;16_chr1:28578000	chr1	+	28578548	28581864	3317	132M852N56M354N43M1I3M1609N268M	0.0231049	62.6087	NA	NA	NA	NA
26d5280b-5af5-4579-b27e-bc8232a4074e.K562.5EU.0.unlabeled.III;16_chr1:28578000	chr1	+	28578548	28581864	3317	132M852N453M578N671M2D3M358N268M	0.203254	67.8478	202.51	0.0652885	78.3609	154.285
0669c9f2-cccd-4142-999b-e26f40455590.K562.5EU.60.labeled.V;16_chr1:28578000	chr1	+	28578548	28581864	3317	132M852N63M324N66M578N671M2D3M358N268M	0.0392551	135.208	202.88	0.0924196	30.6383	203.52
031db22f-444d-4d8f-bca9-4413862a1cba.K562.5EU.60.labeled.VI;16_chr1:28578000	chr1	+	28578548	28581864	3317	132M852N453M578N84M464N121M6D1M354N272M	0.241591	75.4874	176.65	0.179176	23.5914	NA
acea28a3-d140-4757-8572-e7f9fadf1d64.K562.5EU.60.labeled.II;16_chr1:28578000	chr1	+	28578548	28581864	3317	2686M2D3M358N268M	0.454046	21.6944	174.338	0.13412	26.3128	333.2
6cbc07a6-56ec-4683-9b88-d6e374f0fe6b.K562.5EU.60.labeled.IV;16_chr1:28578000	chr1	+	28578548	28581864	3317	132M852N56M354N43M578N84M464N121M6D1M354N272M	0.0549306	38.8778	66.105	0.0202733	110.437	NA
f67826a2-108b-4f65-9e06-710aa2603d3d.K562.5EU.60.labeled.VI;16_chr1:28578000	chr1	+	28578548	28581838	3291	1437M578N1276M	0.0924196	30.6383	NA	0.0231049	62.6087	NA
458d1573-1b99-4617-b6e6-51dd2c85c28b.K562.5EU.60.labeled.heat.IV;16_chr1:28578000	chr1	+	28578548	28581864	3317	132M852N453M578N84M447N138M6D1M354N272M	0.0425688	86.2938	62.405	0.0626672	94.2796	NA
902e4a61-4825-4ced-9d38-8cebb5baf31d.K562.5EU.60.labeled.heat.IV;16_chr1:28578000	chr1	+	28578548	28581864	3317	132M852N63M324N66M578N86M1D5M942N268M	NA	NA	NA	NA	NA	NA
c1cfd913-1e1c-43e2-afb1-d741d3fc5701.K562.5EU.0.unlabeled.II;16_chr1:28578000	chr1	+	28578548	28581864	3317	132M852N63M324N66M578N84M464N121M6D1M354N272M	0.0549306	38.8778	NA	NA	NA	NA
ad91982b-96c9-4148-820e-038955e59d1e.K562.5EU.60.labeled.IV;16_chr1:28578000	chr1	+	28578548	28581864	3317	132M852N63M324N66M578N84M447N138M6D1M354N272M	0.0549306	38.8778	NA	0.0231049	62.6087	NA
467958bc-dd4c-476a-adc3-3d714e6788f3.K562.5EU.60.labeled.VI;16_chr1:28578000	chr1	+	28578548	28581864	3317	1437M578N84M464N121M6D1M354N272M	0.240245	41.5581	100.29	0.0425688	86.2938	NA
2b3d6776-fbc6-4c97-a867-d40fab0b71da.K562.5EU.60.labeled.heat.III;16_chr1:28578000	chr1	+	28578548	28581864	3317	132M852N1115M464N121M6D1M354N272M	0.274653	38.8778	178.995	0.0425688	86.2938	146.96
5dbf68e9-1d20-4125-87ed-8567e1410c0a.K562.5EU.60.labeled.VI;16_chr1:28578000	chr1	+	28578548	28581864	3317	132M852N448M1129N123M6D1M354N272M	NA	NA	NA	NA	NA	NA
cc18a60f-3dd8-4ce6-b681-69628037cd31.K562.5EU.60.labeled.heat.I;16_chr1:28578000	chr1	+	28578548	28579878	1331	132M852N56M95N196M	NA	NA	NA	NA	NA	NA
ffcdc5a0-70dc-4eae-ad9e-4b3c00ff51d2.K562.5EU.0.unlabeled.II;16_chr1:28578000	chr1	+	28578548	28581864	3317	132M852N1702M2D3M358N268M	0.274653	38.8778	162.395	0.0383576	160.698	44.42
5956c3c4-1271-4ed2-9e97-d00a824e4b83.K562.5EU.60.labeled.IV;16_chr1:28603000	chr1	+	28603098	28643054	39957	477M1797N89M7786N115M4591N70M3883N260M20828N2I61M	0.370396	141.843	80.565	0.290113	150.411	103.84
88e87db5-1d14-460b-a081-ccb8b6d755ef.K562.5EU.60.labeled.V;0_chr1:28648000	chr1	+	28648613	28648987	375	375M	0.0202733	110.437	NA	NA	NA	NA
NM_001319674_001319674	chr1	+	28668794	28715065	46272	46M14743N158M6363N83M1398N125M1232N104M3881N158M5353N132M1622N138M6190N123M3430N993M	0.0462098	62.6087	NA	0.0383576	160.698	139.04
8a960aa9-af8a-43e2-b334-6223454d1ca6.K562.5EU.1440.labeled.II;0_NM_001319674	chr1	+	28702588	28715245	12658	1742M6190N123M3430N1173M	NA	NA	NA	0.0202733	110.437	NA
c03e95e2-f300-4e08-9e14-dbeb7c0e062e.K562.5EU.1440.labeled.II;16_chr1:28735000	chr1	+	28736053	28737402	1350	1350M	0.0462098	62.6087	NA	0.0763576	46.8654	27.35
250fb214-7646-4ac8-b6eb-0430fd781f56.K562.5EU.60.labeled.heat.I;0_NM_016258	chr1	+	28736952	28769770	32819	196M510N25M576N80M30590N842M	0.0178042	397.408	95.695	0.101366	110.437	120.405
3c8eca07-c5eb-4aeb-a383-53485b114778.K562.5EU.60.labeled.VI;0_NM_016258	chr1	+	28736952	28769770	32819	196M510N25M576N80M1964N96M2004N1584M24942N842M	0.461027	92.8233	129.48	0.25814	82.3213	111.555
NM_016258_016258	chr1	+	28736952	28769770	32819	196M510N25M576N80M4064N1584M24942N842M	0.400675	90.0695	100.987	0.182459	110.437	88.3
154ccfd6-e7da-4dbb-8104-8d1eb94a764a.K562.5EU.1440.labeled.II;0_NM_016258-2	chr1	+	28736952	28769770	32819	1387M4064N1584M24942N842M	0.338042	89.2818	160.825	0.17515	143.621	152.26
d6090884-9f1a-41df-905a-8f2d56e5a69b.K562.5EU.60.labeled.III;0_NM_203342	chr1	+	28887113	29120039	232927	98M100237N458M5424N213M3672N105M14545N43M3784N76M2456N219M11957N88M2605N153M2580N98M3330N173M13677N209M7109N63M4497N177M32648N129M11400N102M2930N81M3250N105M1015N3221M	0.428362	83.9088	96.9825	0.748031	35.1215	108.32
62004841-66ca-436f-a03b-9e94c7283d84.K562.5EU.60.labeled.heat.III;0_NM_203342	chr1	+	28887125	29120039	232915	86M100237N458M5424N213M3672N105M14545N43M3784N76M2456N219M11957N88M2605N153M2580N98M3330N173M13680N206M7109N63M4497N177M32648N129M11400N102M2930N81M3250N105M1015N3221M	0.451034	82.888	93.29	0.12164	110.437	118.965
e6f26c32-8543-4b89-ab73-64633da77a48.K562.5EU.0.unlabeled.II;0_NM_203342	chr1	+	28914544	29120039	205496	225M72662N475M5424N213M3672N105M14545N43M3784N76M2456N219M11957N88M2605N153M2580N98M3330N173M13677N209M11669N177M32648N129M14432N81M3250N105M1015N3221M	0.273042	91.8163	112.203	0.229073	46.8654	112.48
64cdf6d6-d2e0-4daa-81b2-3fc0b6c5583d.K562.5EU.60.labeled.heat.I;0_NM_203342-1	chr1	+	28914563	29120039	205477	206M72662N475M5424N213M3672N105M14545N43M3784N76M2456N219M11957N88M2605N153M2580N98M3330N173M13677N209M11669N177M32648N129M11400N102M2930N81M3250N105M1015N3221M	0.729837	53.1793	63.5925	0.293178	93.1352	115.6
1f890c13-49f1-4420-af6b-5b601794b3c1.K562.5EU.60.labeled.II;16_chr1:29147000	chr1	+	29147749	29167536	19788	1476M876N89M4503N224M4463N1138M5372N1647M	0.158129	128.951	64.0125	0.0775387	147.859	102.72
4f1c956c-72f2-41e3-8fcc-323ca7745726.K562.5EU.0.unlabeled.III;16_chr1:29147000	chr1	+	29147749	29181878	34130	1476M876N89M4503N224M4463N105M888N145M21128N233M	0.45702	78.3609	106.895	0.398155	59.8368	112.035
20d2fbcc-b74f-469b-bbec-a75c3aa454ef.K562.5EU.0.unlabeled.I;16_chr1:29147000	chr1	+	29147749	29181852	34104	1475M5469N224M4463N105M888N145M21128N207M	0.177188	132.422	142.95	0.0986869	130.199	104.4
76774171-e6cb-4d38-a3e3-12d48b08adab.K562.5EU.0.unlabeled.II;16_chr1:29147000	chr1	+	29147749	29181893	34145	1479M1D3M881N77M4503N224M4463N105M888N145M21128N248M	0.266933	102.947	94.595	0.105193	91.0784	73.71
09124e3f-cda3-4ce4-b520-dd5cf6037da2.K562.5EU.60.labeled.III;16_chr1:29192000-2	chr1	+	29192869	29230936	38068	1311M1761N71M181N2M3D60M4257N72M1352N2M1D104M1085N105M3528N144M1D1M9098N124M451N230M1D1M13917N205M	0.180197	68.5032	50.835	0.261554	43.6881	61.72
2401c43c-501e-43bd-9517-a58c5fccea85.K562.5EU.60.labeled.VI;16_chr1:29192000-2	chr1	+	29192869	29230936	38068	1311M1761N71M181N2M3D60M4257N72M1352N2M1D104M1085N105M3528N144M1D1M9098N124M451N103M14045N206M	1.00331	35.392	100.47	1.12806	28.1921	114.2
c84358bb-90f9-4258-a24a-2def0a24b09b.K562.5EU.60.labeled.heat.III;16_chr1:29193000	chr1	+	29193813	29216138	22326	367M1761N71M181N2M3D60M4151N178M1352N2M1D104M1085N105M3528N144M1D1M9098N131M	0.0652885	78.3609	40.915	0.0693147	62.6087	151.34
8459bd50-391c-4ba3-ae50-6c8587f199e1.K562.5EU.60.labeled.heat.V;16_chr1:29193000	chr1	+	29193820	29230936	37117	358M1766N68M181N2M3D60M4257N72M1352N2M1D104M1085N105M3528N144M1D1M9098N124M451N103M14045N206M	0.0191788	160.698	NA	NA	NA	NA
cc1c9c31-ad73-48f1-b068-e07e3639ef10.K562.5EU.60.labeled.I;0_NM_133178	chr1	+	29320694	29326799	6106	132M2545N126M134N158M1402N136M272N1201M	NA	NA	NA	NA	NA	NA
d0a315df-6d4a-41aa-bc4e-f4d9b67721e4.K562.5EU.60.labeled.IV;0_NR_034182	chr1	+	30718810	30726830	8021	7242M191N588M	0.146156	33.9811	NA	0.13412	26.3128	NA
725c837f-057b-44e8-998d-236425a58ef5.K562.5EU.60.labeled.heat.II;0_chr1:30731000-1	chr1	+	30731948	30738592	6645	199M658N180M5342N266M	0.0462098	62.6087	62.2	NA	NA	NA
032fd748-7239-443c-8895-abbdf2d40200.K562.5EU.60.labeled.II;16_chr1:30732000	chr1	+	30732463	30757833	25371	1451M1249N1M6D90M2332N3M6D93M1240N2I3M2D124M748N2I129M5D1697N75M739N94M15109N175M	0.170275	86.2938	110.118	0.401324	35.392	152.295
1e7e2343-950d-408a-887c-b29fd271de69.K562.5EU.60.labeled.VI;16_chr1:30869000	chr1	+	30869477	30873119	3643	3643M	NA	NA	NA	0.0231049	62.6087	NA
cec0b3d5-3a25-46a4-8e22-bdb557215bc4.K562.5EU.60.labeled.I;16_chr1:30931000	chr1	+	30931505	30935759	4255	1838M2199N218M	0.0594458	126.875	167.75	0.0383576	160.698	146.93
d0c247a7-21d7-4e9f-9d17-5b303873ce8c.K562.5EU.60.labeled.heat.III;16_chr1:30931000	chr1	+	30931505	31065701	134197	1838M3300N4632M725N126M3D1M3219N135M4643N135M1972N135M1350N265M10694N2I233M1071N297M888N142M1039N4D139M6158N158M5259N101M1145N94M10981N3D271M2393N167M2D10630N177M959N2M3D109M21693N67M30339N373M6038N89M	0.163854	104.347	90.5725	0.0583832	143.621	205
85a3ed8e-4ae3-41d0-9c0b-6b3ae45b5df6.K562.5EU.60.labeled.IV;16_chr1:30931000	chr1	+	30931505	31065701	134197	1838M3300N195M4315N122M725N126M3D1M3219N135M4643N135M1972N135M1350N265M10694N2I233M1071N297M888N142M1039N4D139M6158N158M5259N96M1148N96M10981N3D266M2395N3M2I167M2D10630N177M959N2M3D109M21693N67M30339N373M6038N89M	0.0539527	331.995	111.942	NA	NA	161.5
929f0bec-fd7c-4e0a-8b3a-82eba4ff7ac5.K562.5EU.0.unlabeled.II;16_chr1:30931000	chr1	+	30931505	31065698	134194	1838M3300N195M4315N122M725N126M3D1M3219N135M4649N129M1972N135M1350N265M10694N2I233M1071N297M888N142M1039N4D139M6158N158M5259N96M1148N96M10981N3D266M2395N3M2I167M2D10630N177M959N2M3D109M21693N67M30339N373M6038N86M	0.112542	195.914	153.965	0.0976267	140.246	201.48
d95bba79-73af-459b-9093-ba6ca576e468.K562.5EU.60.labeled.heat.V;16_chr1:30931000	chr1	+	30931505	30949187	17683	1838M3300N195M4315N122M725N126M3D1M3219N135M3517N187M	0.0361951	300.991	230.945	0.0367896	242.092	164.8
505fbd9d-384b-4e1b-9ecb-d95e435ecde9.K562.5EU.60.labeled.heat.V;0_chr1:31155000	chr1	+	31155070	31156130	1061	83M572N406M	NA	NA	NA	0.0231049	62.6087	NA
d5674f96-4a31-4e57-bf9e-700fd320ef08.K562.5EU.60.labeled.heat.V;16_chr1:31259000-2	chr1	+	31259578	31263473	3896	543M6D1396N1M5D1945M	0.0568456	178.123	66.625	0.179176	23.5914	81
1d9c3fd5-eb7f-459d-a208-273a77e184c6.K562.5EU.60.labeled.IV;16_chr1:31259000-2	chr1	+	31259578	31296776	37199	543M6D1396N1M5D106M6238N57M1221N2D2M2D84M2138N119M9874N125M7757N168M5D2488N94M1212N121M3262N173M	0.984717	92.9162	139.058	0.741001	77.8957	142.115
eeeab747-d5a9-456d-90a5-919bd1bfbaa6.K562.5EU.60.labeled.heat.II;16_chr1:31259000	chr1	+	31259578	31296776	37199	543M6D1396N1M5D106M6238N57M1221N2D2M2D84M2138N119M9874N125M7867N58M5D2488N94M1212N127M3262N167M	0.14043	117.446	75.5475	0.277259	62.6087	84.78
NM_016505_001282569	chr1	+	31297010	31365508	68499	66M12968N121M8944N58M18008N101M1681N92M7591N101M2088N146M15057N1477M	0.468257	86.2938	100.065	0.185953	99.6364	77.515
NM_001282568_001282569	chr1	+	31297047	31364929	67883	167M12830N121M8944N58M18008N101M1681N92M7591N101M2088N146M15057N898M	0.0594458	126.875	121.953	0.0178042	397.408	86.35
NM_178865_018565	chr1	+	31413241	31434639	21399	64M10388N162M828N191M456N80M366N138M740N170M2154N91M328N142M3428N219M878N576M	0.0549306	38.8778	NA	0.0763576	46.8654	NA
NM_022164_001204415	chr1	+	31576547	31587688	11142	49M538N325M1745N64M3881N93M219N115M1102N124M84N151M114N190M99N46M267N124M833N46M83N850M	0.0924196	62.6087	66.76	NA	NA	NA
cd5e8dd0-3425-46e1-b29d-f074a7ddb072.K562.5EU.0.unlabeled.I;16_chr1:31629000-1	chr1	+	31629867	31644894	15028	976M1652N144M6D514N154M1907N302M9318N55M	0.698554	77.3725	135.713	0.844351	50.1203	114.71
663213a2-e774-467e-a9fa-59bf2ad5c97e.K562.5EU.60.labeled.IV;16_chr1:31629000	chr1	+	31629867	31644873	15007	976M1652N144M6D514N153M11526N36M	0.515098	31.63	52.64	0.625074	24.8163	91.605
5a4699e1-0e0a-4dd3-bf18-549a238cb776.K562.5EU.60.labeled.IV;16_chr1:31629000	chr1	+	31629867	31644873	15007	236M2D445N293M1652N144M6D514N154M1907N302M9318N34M	0.0202733	110.437	67.305	NA	NA	NA
3e84928e-7f02-4876-83d7-8a7e79e63e2f.K562.5EU.1440.labeled.II;16_chr1:31836000	chr1	+	31836241	31837310	1070	1070M	NA	NA	NA	NA	NA	NA
3b532c8c-fd25-4ccc-a575-70d93251241c.K562.5EU.60.labeled.heat.IV;16_chr1:31906000	chr1	+	31906424	31906923	500	500M	0.0713777	380.609	59.69	0.0929765	214.086	108.615
d87e4358-c301-4542-901b-f4c3f06e5349.K562.5EU.60.labeled.IV;16_chr1:31906000	chr1	+	31906434	31938099	31666	2527M1077N70M1583N135M4064N97M2982N688M18328N115M	0.992228	199.654	80.64	0.751709	192.326	116.17
0da02d7c-3954-4fbb-a055-dc198cb3bd30.K562.5EU.1440.labeled.II;16_chr1:31906000-2	chr1	+	31906447	31938099	31653	2514M1077N70M27867N4M7D114M	0.171873	166.467	84.975	0.0753943	186.972	85.525
27331a87-c8ae-400e-bfad-9036d5f2377a.K562.5EU.60.labeled.IV;16_chr1:31908000-2	chr1	+	31908288	31938347	30060	676M6934N89M2982N688M18328N363M	0.0185953	214.086	38.385	0.0185953	214.086	97.54
9dee719b-5234-475e-89e8-a7f1bbb9ee35.K562.5EU.1440.labeled.II;16_chr1:31908000	chr1	+	31908653	31938293	29641	308M1077N78M5782N89M21999N308M	0.0231049	62.6087	40.465	0.0549306	38.8778	NA
41afb1d3-4327-42e6-a454-b9e87c0f2537.K562.5EU.60.labeled.IV;16_chr1:31908000	chr1	+	31908653	31938174	29522	308M1077N70M1583N139M4068N89M2982N688M18328N74M59N57M	0.403923	112.884	95.77	0.494496	69.0396	93.545
57fc0a73-97b5-4709-8549-143249a9fb80.K562.5EU.60.labeled.V;16_chr1:31908000-1	chr1	+	31908653	31938347	29695	308M1077N70M1583N135M7143N688M18328N363M	0.199279	73.0968	82.43	0.105193	91.0784	107.85
c99294af-0356-43b8-886e-982309b252f9.K562.5EU.0.unlabeled.I;16_chr1:31908000-1	chr1	+	31908653	31938347	29695	308M1077N70M1583N135M26160N362M	0.0462098	62.6087	55.135	0.0549306	38.8778	20.34
3a16f6b6-9899-4c33-b311-2d7a6d3cd3cd.K562.5EU.60.labeled.V;16_chr1:31908000-1	chr1	+	31908653	31938347	29695	305M2733N3M2D134M4068N89M2982N688M18328N363M	0.368232	105.022	88.02	0.280868	80.7967	100.65
0da02d7c-3954-4fbb-a055-dc198cb3bd30.K562.5EU.1440.labeled.II;16_chr1:31906000	chr1	+	31908653	31938347	29695	308M1077N70M27867N4M7D362M	NA	NA	18.845	0.0231049	62.6087	NA
b550396b-42ec-4d90-84fa-116a770235ae.K562.5EU.0.unlabeled.II;16_chr1:31951000	chr1	+	31951593	31958009	6417	590M2D5M1D3M5778N38M	NA	NA	NA	NA	NA	NA
NM_001271878_006559-2	chr1	+	32013760	32043869	30110	618M15920N125M2765N147M3575N134M791N202M515N68M895N59M2953N1343M	0.208226	179.725	110.125	0.17515	143.621	99.39
NR_073498_006559	chr1	+	32013886	32043847	29962	492M15920N125M1101N117M1547N147M3575N134M791N285M432N68M895N59M2953N1321M	0.173072	80.3397	79.36	0.101366	110.437	139.96
NM_006559_006559	chr1	+	32013886	32043869	29984	492M15920N125M1101N117M1547N147M3575N134M791N202M515N68M895N59M2953N1343M	1.57497	72.5787	105.885	1.07401	76.1027	85.87
29ac0508-2286-43bb-a18e-e98ef7bf3c44.K562.5EU.0.unlabeled.I;0_NM_006559	chr1	+	32013886	32043869	29984	492M15920N125M1101N117M1547N147M3575N134M2471N59M2953N1343M	0.214389	142.086	128.875	0.141913	110.437	83.875
3be41f47-2ade-4d45-aa86-0c27aa5b5e88.K562.5EU.0.unlabeled.II;0_NM_006559	chr1	+	32013886	32043869	29984	492M15920N125M1101N117M1547N147M4500N285M432N68M895N59M2953N1343M	0.209525	170.159	85.615	0.156007	141.51	28.06
f797d867-b713-48a0-af0e-975ac538e5af.K562.5EU.60.labeled.II;0_NM_006559	chr1	+	32036005	32043869	7865	1039M791N202M515N1022M2953N1343M	0.0899212	331.995	131.845	0.129328	229.977	86.33
NM_001319679_018056	chr1	+	32072941	32102863	29923	111M1899N127M525N220M15852N337M2772N188M5470N121M1868N433M	0.0425688	86.2938	51.875	NA	NA	NA
NM_018056_018056	chr1	+	32072977	32102863	29887	75M1899N127M525N220M940N84M317N155M14356N337M2772N188M5470N121M1868N433M	0.167524	55.8758	71.925	0.0924196	62.6087	92.92
1ea880cc-475d-47e2-bc8f-bc61d2fb8720.K562.5EU.60.labeled.heat.IV;0_NM_018056	chr1	+	32077262	32102860	25599	57M14356N337M2772N188M688N103M4679N121M1868N430M	0.0231049	62.6087	NA	0.0231049	62.6087	NA
590b88e1-6b0f-4d2a-af2a-918cf92817c8.K562.5EU.1440.labeled.II;0_chr1:32095000	chr1	+	32095717	32102853	7137	46M4679N2412M	0.184839	30.6383	36.0625	0.0549306	38.8778	138.6
c6dc531b-41d4-40b8-ac59-6f621559f55d.K562.5EU.1440.labeled.II;0_NM_012316	chr1	+	32108064	32157886	49823	71M17936N145M28372N134M2131N1034M	NA	NA	NA	NA	NA	NA
96bf729d-ec13-4e7d-b654-cab48e3d58e5.K562.5EU.60.labeled.heat.IV;0_NM_012316	chr1	+	32139763	32171583	31821	102M14723N134M2131N93M400N100M821N95M1038N132M1083N89M1243N100M314N164M710N79M2791N126M938N128M2585N179M646N877M	0.0359685	331.995	61.515	0.111125	72.0459	171.12
NM_175852_175852	chr1	+	32179687	32198287	18601	90M537N201M727N336M2947N92M3337N171M1930N195M2061N120M226N75M476N93M764N96M741N3386M	0.267759	164.402	157.018	0.173397	154.968	197.33
NM_024296_024296	chr1	+	32200614	32205391	4778	96M1203N187M1779N167M140N194M218N23M573N198M	0.621082	44.8818	92.71	0.857313	35.6261	105.91
879fd3b5-87ff-4802-ac44-8ade776c0c32.K562.5EU.60.labeled.heat.V;0_NM_024296-1	chr1	+	32200614	32205391	4778	96M1203N187M1779N167M552N23M573N198M	0.115525	62.6087	12.605	0.184839	30.6383	78.93
NM_018134_018134	chr1	+	32205670	32208675	3006	54M430N144M211N253M240N119M119N1436M	0.0608198	110.437	101.725	NA	NA	NA
a878639e-1c58-4ce7-b673-2aee4ff71c60.K562.5EU.0.unlabeled.I;16_chr1:32216000	chr1	+	32216201	32222334	6134	746M311N96M1D1M3778N61M664N4D3M1D153M6D3M4D278N24M	0.0763576	46.8654	NA	0.277259	20.2817	126.1
NM_003757_003757	chr1	+	32221809	32231601	9793	224M325N87M93N93M1403N88M288N66M1695N150M82N128M1968N111M117N90M318N74M1718N93M95N487M	12.2651	26.7087	88.835	11.4357	23.3446	91.855
6f354c8f-8732-4a17-bc1b-b1d5ae18b444.K562.5EU.60.labeled.IV;0_NM_003757	chr1	+	32222410	32231601	9192	35M93N93M1403N88M288N66M4023N111M117N90M318N2467M	0.329584	38.8778	162.757	0.369678	30.6383	63.29
b31ea405-5fcc-46fc-98f5-c7602224d289.K562.5EU.1440.labeled.II;0_NM_003757	chr1	+	32222410	32231580	9171	35M93N93M1403N88M288N66M1695N150M82N128M1968N111M117N90M2110N93M95N466M	0.13412	26.3128	NA	0.0231049	62.6087	NA
c1790ace-bec4-4b7c-ada6-945091f9e475.K562.5EU.60.labeled.heat.IV;0_NM_003757	chr1	+	32222410	32231601	9192	35M93N93M1403N88M288N66M1695N150M82N128M1968N111M117N90M318N74M1718N93M240N342M	NA	NA	NA	0.0652885	78.3609	NA
2203bc2d-a8f9-4aae-9969-7ea55ff029af.K562.5EU.60.labeled.V;0_NM_003757	chr1	+	32222410	32231601	9192	35M93N93M1403N88M288N66M1695N150M82N128M1968N111M117N90M318N74M1718N93M101N481M	0.529657	37.5996	22.675	0.627446	27.0104	36.21
71221221-8093-4d08-8ded-3099f3b057d8.K562.5EU.1440.labeled.II;0_NM_003757	chr1	+	32222410	32231580	9171	35M93N93M1403N88M288N66M4023N111M117N90M2110N654M	NA	NA	NA	NA	NA	NA
b1cd5428-053a-4fed-8129-4a98dfd0eae9.K562.5EU.60.labeled.IV;0_NM_003757	chr1	+	32222410	32231601	9192	35M96N90M1403N88M288N66M1695N150M82N128M1968N111M117N90M318N74M1718N93M95N487M	1.99845	29.0141	80.0475	2.64893	23.131	72.075
2203bc2d-a8f9-4aae-9969-7ea55ff029af.K562.5EU.60.labeled.V;0_NM_003757-1	chr1	+	32222410	32231580	9171	35M93N93M1403N88M288N66M1695N150M82N128M1968N111M117N90M318N74M1718N93M101N460M	0.26824	26.3128	NA	0.0405465	110.437	47.59
ebf82b7c-c1a2-470e-8010-43d0f12d07d6.K562.5EU.1440.labeled.II;0_NM_003757	chr1	+	32222410	32231601	9192	35M93N93M1403N88M288N66M1927N128M1968N111M117N90M318N74M1718N93M95N487M	1.00885	39.5319	59.615	1.72684	16.2368	98.625
965ffd8e-d06f-41c8-8e3a-0b7a02c6e811.K562.5EU.1440.labeled.II;0_NM_003757	chr1	+	32222537	32231601	9065	94M3540N150M82N128M1968N111M117N90M2110N675M	0.0383576	160.698	71.5125	NA	NA	NA
0b3f0f6d-5d06-42c4-99ac-869cc74165a2.K562.5EU.1440.labeled.II;0_NM_003757	chr1	+	32222537	32231601	9065	1939M4023N111M117N90M2110N93M95N487M	0.0608198	110.437	97.76	0.125334	94.2796	82.5
706a8115-cbd9-4d46-a49f-e630751d0bb5.K562.5EU.1440.labeled.II;0_NM_003757	chr1	+	32222537	32231601	9065	94M5868N111M117N90M318N74M1718N93M95N487M	0.584623	33.9811	63.725	0.635413	28.9322	54.87
6092c1e0-edff-4826-bb6c-b1bcb57f0584.K562.5EU.0.unlabeled.II;0_NM_003757	chr1	+	32228542	32231601	3060	667M1718N93M101N481M	0.0652885	78.3609	NA	0.164792	38.8778	113.98
d9074146-2ea3-4df0-ab3b-f0d233334d6a.K562.5EU.60.labeled.heat.I;0_NM_004964	chr1	+	32292119	32333595	41477	100M10402N113M13931N118M7696N75M2385N139M458N3151M81N141M565N109M93N131M283N153M458N49M267N579M	0.785825	47.3763	92.305	0.739357	30.6383	103.075
57a9097b-ae61-4ec4-8daa-ebc5c00c55ca.K562.5EU.60.labeled.IV;0_NM_004964	chr1	+	32292119	32333621	41503	100M10402N113M13931N118M7696N75M2385N139M458N142M3835N70M93N131M283N153M458N49M267N605M	0.213569	57.3726	25.595	NA	NA	181.1
c9c0e7ab-2150-4ab0-b7c1-afdc473f5371.K562.5EU.0.unlabeled.II;0_NM_004964	chr1	+	32292152	32333621	41470	67M10402N113M13931N118M7696N75M2385N3748M81N141M565N109M93N131M283N153M458N49M267N605M	0.693147	62.6087	124.11	0.588565	58.8389	113.385
79b26940-d9e9-4250-93a5-6188bfed265d.K562.5EU.60.labeled.I;0_NM_004964	chr1	+	32302661	32333621	30961	73M13931N7889M2385N3970M565N109M93N567M458N49M267N605M	0.202733	110.437	59.79	0.323469	62.6087	183.14
97f444dd-ddee-4c7f-951f-32253e95fc2a.K562.5EU.0.unlabeled.II;0_chr1:32304000	chr1	+	32304344	32305238	895	895M	NA	NA	NA	NA	NA	NA
76d78b65-6d42-4001-a34b-b6343a1913a1.K562.5EU.60.labeled.IV;0_NM_004964	chr1	+	32327033	32333621	6589	45M458N3151M81N141M565N109M97N127M283N153M458N49M267N605M	0.0739582	227.974	31.9525	0.0851376	86.2938	61.64
6b306519-db29-4a0a-af4a-27eff2bdc8d5.K562.5EU.60.labeled.heat.I;0_NM_004964	chr1	+	32329884	32333621	3738	803M81N141M565N109M93N567M458N921M	0.143594	103.48	87.2	0.103094	100.711	169.93
4bd3c43e-77d9-4430-97b0-be6fbd659a6b.K562.5EU.60.labeled.heat.IV;0_NM_004964	chr1	+	32331544	32333621	2078	39M93N271M143N153M458N49M267N605M	0.0575364	160.698	NA	0.0594458	126.875	109.54
165989a5-5e1c-4bff-8e30-3c5e5a624ac3.K562.5EU.60.labeled.heat.III;16_chr1:32333000	chr1	+	32333847	32336220	2374	1250M849N275M	3.90644	58.9184	87.5875	2.53878	44.7601	106.5
894bd2d8-7f76-4729-ae8d-ec1880d0ae1e.K562.5EU.60.labeled.heat.II;0_chr1:32359000	chr1	+	32361275	32362651	1377	1377M	0.0608198	110.437	104.362	0.0924196	30.6383	290.85
d0f461ca-13fd-4dc3-b095-74edb7d1cc5b.K562.5EU.60.labeled.VI;16_chr1:32361000-3	chr1	+	32361289	32366272	4984	246M194N4544M	0.0568456	178.123	57.565	0.101366	110.437	197.885
bb2d2c4e-a0f7-412a-b9c3-0c64978d36dc.K562.5EU.60.labeled.IV;16_chr1:32365000	chr1	+	32365112	32394433	29322	1543M1792N103M7706N5D483M1228N80M3D163N64M440N117M2374N58M2561N217M3D2M2727N117M7184N60M1D262N29M	0.163854	104.347	112.94	0.22225	72.0459	178.46
869784f1-2a0f-4864-ae95-181b82e2f2cb.K562.5EU.60.labeled.heat.III;16_chr1:32365000	chr1	+	32365112	32394142	29031	3438M7706N5D483M1228N80M3D163N64M440N117M2374N58M2561N108M2D2M3D2834N117M7184N61M	0.0357752	364.113	127.915	0.0176675	467.806	160.85
5d57298c-6085-4a30-b53e-fe4298f8c5b7.K562.5EU.60.labeled.IV;16_chr1:32365000	chr1	+	32365112	32394433	29322	1543M1792N103M7706N5D483M1228N80M3D163N64M440N117M2374N58M2561N168M2781N117M7184N60M1D262N29M	0.241591	75.4874	183.798	0.0361951	300.991	134.46
90dc8a07-f686-4ec8-b5c3-596a02513d34.K562.5EU.60.labeled.IV;16_chr1:32375000	chr1	+	32375515	32394142	18628	1229M1228N80M3D163N64M440N117M2374N58M2561N168M2781N117M7184N61M	0.0231049	62.6087	NA	NA	NA	NA
NM_001040441_001040441	chr1	+	32539478	32600755	61278	95M13886N82M39390N824M1299N170M4863N669M	NA	NA	28.65	NA	NA	NA
e5ac5ece-b38b-4ea0-9083-5fa07b5d972f.K562.5EU.60.labeled.VI;0_chr1:32600000	chr1	+	32600932	32605945	5014	5014M	NA	NA	NA	NA	NA	NA
fc0f9caa-a12e-4b00-80e7-ad62bdcb4dee.K562.5EU.60.labeled.IV;16_chr1:32608000	chr1	+	32608694	32650522	41829	634M769N51M40284N91M	NA	NA	NA	NA	NA	NA
50a8642b-2b20-443e-b5ff-4ad9bb19d852.K562.5EU.60.labeled.II;16_chr1:32620000-1	chr1	+	32620817	32650522	29706	1141M3I2M9852N10M2I3M6I54M1765N83M223N161M657N25M15640N90M	0.105193	91.0784	NA	0.0626672	94.2796	43.7
fa853ffb-4135-4056-985a-872927379fe0.K562.5EU.0.unlabeled.II;16_chr1:32620000-3	chr1	+	32620817	32650947	30131	1141M3I2M9852N10M2I3M6I54M1765N83M223N118M695N30M15640N515M	0.446963	43.1254	51.68	0.535314	41.2911	136
7b47e5f5-1167-4d11-94f9-8d9e05f35c81.K562.5EU.60.labeled.V;16_chr1:32620000	chr1	+	32620817	32650522	29706	1141M3I2M9852N10M2I3M6I54M1765N83M16705N91M	0.0202733	110.437	NA	0.0462098	62.6087	NA
e2d200f2-9b7e-418e-8c19-faae8782f4f2.K562.5EU.1440.labeled.I;16_chr1:32621000-1	chr1	+	32621268	32651001	29734	680M28484N570M	NA	NA	NA	NA	NA	NA
a891ffc9-7043-4d73-8499-12d9ecd953e0.K562.5EU.1440.labeled.II;16_chr1:32621000	chr1	+	32621830	32650522	28693	124M5559N32M7I2M2I2M1I11M22873N90M	NA	NA	NA	NA	NA	NA
dc3b13cc-43cd-48e7-b65a-2401fa353063.K562.5EU.60.labeled.heat.IV;16_chr1:32621000-1	chr1	+	32621830	32650575	28746	128M3I2M9852N10M2I3M6I54M1765N83M223N161M16318N147M	0.146156	33.9811	115.125	NA	NA	NA
acbe87e1-9b08-44fb-8a28-8e20ee068e35.K562.5EU.60.labeled.IV;16_chr1:32621000	chr1	+	32621830	32650522	28693	128M3I2M11661N2D15M1I89M223N161M16322N90M	0.0231049	62.6087	NA	NA	NA	NA
d8223f71-5c9b-470e-a1de-dd89100ab1e6.K562.5EU.60.labeled.heat.V;16_chr1:32621000	chr1	+	32621830	32650522	28693	128M3I2M9852N10M2I3M6I54M1765N83M223N118M695N30M15609N121M	0.0763576	46.8654	126.445	NA	NA	NA
f4dbc3aa-0916-4c83-8593-5c4650cd0e57.K562.5EU.1440.labeled.I;16_chr1:32621000	chr1	+	32621830	32650522	28693	124M5807N1I4M2I2M4I2M8I3M1I95M1D5778N81M223N118M695N30M15640N90M	0.0425688	86.2938	NA	NA	NA	NA
d8200dcf-fdb5-4353-9db3-01596d6b68e0.K562.5EU.60.labeled.heat.III;16_chr1:32621000-1	chr1	+	32621830	32650563	28734	128M3I2M11661N2D15M1I89M223N118M695N30M15640N131M	0.130777	43.6881	34.885	0.26824	26.3128	138.89
8bba357c-6ede-426d-bd0f-1e321db5cb35.K562.5EU.60.labeled.heat.IV;16_chr1:32621000	chr1	+	32621830	32650522	28693	128M3I2M11661N2D15M1I89M223N161M657N25M15640N90M	NA	NA	NA	0.0202733	110.437	NA
d16b551b-9be1-46a0-9bda-2db54dbb7fbc.K562.5EU.60.labeled.IV;16_chr1:32621000	chr1	+	32621830	32650522	28693	128M3I2M9852N10M2I3M6I54M1765N83M223N118M16360N95M	0.0231049	62.6087	NA	NA	NA	NA
629917cc-06da-401b-8f34-79231ce78293.K562.5EU.0.unlabeled.I;16_chr1:32621000	chr1	+	32621830	32650563	28734	128M3I2M9852N10M2I3M6I54M1765N83M223N118M695N30M15642N129M	0.109861	38.8778	-0.5	NA	NA	NA
1b7080cd-eaed-45d6-a70f-22926da91ba1.K562.5EU.60.labeled.VI;16_chr1:32621000	chr1	+	32621830	32650522	28693	128M3I2M11661N2D15M1I89M223N118M695N30M15636N94M	0.0231049	62.6087	NA	0.0231049	62.6087	NA
4da4406d-ce82-4746-84ac-91ac57c78516.K562.5EU.60.labeled.heat.V;16_chr1:32621000	chr1	+	32621830	32650522	28693	128M3I2M9852N10M2I3M6I54M1765N83M223N161M585N6D91M15640N90M	0.283338	45.4235	119.142	0.316201	42.8907	107.445
1f16acc8-0439-4d9e-bb8b-fa712c8477d2.K562.5EU.0.unlabeled.II;16_chr1:32620000-1	chr1	+	32621830	32650591	28762	128M3I2M28450N3M2I3M2D174M	NA	NA	NA	NA	NA	NA
1ee071d9-46cb-41e1-893e-2762bce3cb85.K562.5EU.60.labeled.heat.I;0_NM_001135256	chr1	+	32651206	32680659	29454	117M591N148M5365N146M10652N174M340N116M117N161M98N127M128N78M2886N77M115N58M91N111M7624N134M	0.200662	35.392	45.8575	0.115525	62.6087	127.14
465d4bfc-f7e2-4fa0-9295-433e14d324fe.K562.5EU.0.unlabeled.III;0_NM_001135256	chr1	+	32651220	32680501	29282	103M594N145M5365N146M10652N174M340N116M117N161M98N127M128N78M2886N77M115N58M91N111M6742N858M	NA	NA	NA	NA	NA	NA
047c3d0d-91da-47c4-a6a6-3c61cc2a255c.K562.5EU.60.labeled.VI;0_NM_001135256	chr1	+	32651220	32680659	29440	103M591N148M5365N146M10652N174M340N116M117N161M98N127M128N78M2886N77M115N58M91N111M557N122M6059N1020M	2.29068	66.8097	140.08	1.34527	69.6835	165.97
bf7360e1-9189-447a-be84-32a8446438ed.K562.5EU.60.labeled.V;0_NM_001135256	chr1	+	32651220	32680641	29422	103M591N148M5365N146M10652N174M340N116M117N161M98N127M128N78M2892N71M115N58M91N111M6738N1002M	0.300689	82.888	126.825	0.135918	146.04	145.4
f12ab176-7161-471f-a07d-20c6723784eb.K562.5EU.60.labeled.V;0_NM_001135256	chr1	+	32651258	32680644	29387	65M591N148M5365N146M10747N79M340N116M117N161M98N127M128N78M2886N77M115N58M91N111M6742N1001M	0.178337	126.875	113.847	0.176129	138.004	137.24
e63be8e0-feb8-4309-a015-4f041677b48c.K562.5EU.60.labeled.IV;0_NM_001135256	chr1	+	32651258	32680493	29236	65M591N148M5365N146M10652N174M573N161M98N127M128N78M2886N77M115N58M91N111M6738N854M	0.0462098	62.6087	100.695	NA	NA	NA
e0c6973b-b1c6-443b-b76f-642c1a883a8a.K562.5EU.60.labeled.heat.II;0_NM_001135256	chr1	+	32651272	32680659	29388	51M591N148M5343N168M10652N174M340N116M117N161M98N127M128N78M2886N77M115N58M91N111M6738N1020M	0.473244	131.032	130.597	0.280838	199.517	147.25
4b0bc24b-008e-44b4-bb10-897109a6438c.K562.5EU.60.labeled.III;0_NM_001135256	chr1	+	32657449	32686211	28763	124M10652N174M340N116M117N161M98N127M128N78M2886N77M115N58M91N111M12723N587M	0.179589	121.363	155.56	0.145519	96.572	143.175
NM_020888_001198972	chr1	+	32741870	32774970	33101	320M25597N171M104N56M534N124M897N114M93N2562M423N2106M	0.383119	86.2938	124.078	0.297982	86.2938	147.495
dd7a1c69-17dc-4c15-8ab3-0c8ab309b076.K562.5EU.60.labeled.IV;0_NM_001198972-2	chr1	+	32753986	32768896	14911	195M13606N171M104N56M534N245M	0.0988514	50.8162	NA	NA	NA	64.085
fc22ec04-3c79-46ef-a564-58e1bda759c6.K562.5EU.60.labeled.IV;0_chr1:32754000	chr1	+	32754022	32769616	15595	159M13606N171M694N965M	0.0462098	62.6087	NA	0.0549306	38.8778	NA
453223af-7938-43bc-9693-55bc65a94e86.K562.5EU.60.labeled.IV;16_chr1:32775000	chr1	+	32775240	32817314	42075	851M3283N7D147M561N187M769N101M1258N138M1D3M3821N708M4086N91M6332N3M5D39M124N91M8638N128M3979N169M2D142N156M2I1M1D1M6131N121M	0.839933	46.8654	131.725	0.872564	42.5277	149.625
652a0c3a-36b4-4a45-a551-4aee63cd7d31.K562.5EU.60.labeled.I;16_chr1:32775000	chr1	+	32775240	32817314	42075	851M3283N7D147M561N187M769N101M1258N138M1D3M3821N81M492N135M4086N91M6503N3M5D83M8638N128M3979N171M6419N1M2D131M	1.09476	35.0218	100.198	0.823959	38.8778	76.61
514db1b4-7845-463b-b5f7-e5799b1dcbc4.K562.5EU.60.labeled.IV;16_chr1:32775000	chr1	+	32775240	32817314	42075	851M3283N7D147M561N187M769N101M1258N138M1D3M3821N4885M6503N3M5D83M8638N128M3979N169M2D142N156M2I1M1D1M6131N121M	1.64568	45.6264	91.32	1.75387	33.9811	106.88
0459af48-3757-4c65-bc63-107c57e0a9a8.K562.5EU.1440.labeled.I;16_chr1:32775000	chr1	+	32775240	32817347	42108	851M3283N7D147M561N187M769N101M1258N138M1D3M3821N81M492N132M10683N2D3M2D77M8636N4M2D131M3979N169M2D142N156M2I1M1D1M6131N154M	0.46743	60.2526	24.0675	0.418124	51.5117	140.68
b9f78a82-69ee-4313-99de-116425654bd9.K562.5EU.60.labeled.IV;16_chr1:32775000	chr1	+	32775240	32786993	11754	851M3283N7D147M561N187M769N1497M1D3M3821N81M492N54M	0.387801	53.7695	132.347	0.660878	32.1677	103.74
e38d44f6-4cf8-4d51-9965-399c5ef89a2d.K562.5EU.60.labeled.IV;16_chr1:32775000	chr1	+	32775240	32817314	42075	851M3283N7D147M561N187M769N101M1258N138M1D3M3821N708M4086N91M6503N3M5D83M8638N128M3979N169M2D142N156M2I1M1D1M6131N121M	1.52715	46.8654	108.975	1.36941	37.3903	98.465
abf385a5-8540-4c35-82c7-392ae76eee4a.K562.5EU.60.labeled.IV;16_chr1:32774000	chr1	+	32775240	32817314	42075	851M3283N7D147M561N187M769N101M1258N138M1D3M3821N81M492N135M4086N91M6503N3M5D83M8638N128M3979N169M2D142N156M2I1M1D1M6131N121M	1.77084	34.4681	99.285	1.0788	38.2559	109.62
d22e1573-1041-4392-bc68-e14fc849db9b.K562.5EU.60.labeled.heat.I;16_chr1:32775000	chr1	+	32775240	32817314	42075	851M3283N7D147M561N187M769N101M1258N138M1D3M3821N708M4086N91M15227N1I2M1D130M3979N169M2D142N156M2I1M1D1M6131N121M	0.387903	65.3815	117.525	0.607467	31.4818	146.24
e38d44f6-4cf8-4d51-9965-399c5ef89a2d.K562.5EU.60.labeled.IV;16_chr1:32775000-2	chr1	+	32775685	32817347	41663	406M3283N7D147M561N187M769N101M1258N138M1D3M3821N708M4086N91M6503N3M5D83M8638N128M3979N169M2D142N156M2I1M1D1M6131N154M	0.446963	43.1254	43.8	0.359437	27.5138	81.2
0049add9-9b7c-4792-9ea1-115fb5ca2d79.K562.5EU.1440.labeled.II;16_chr1:32810000-1	chr1	+	32810240	32817433	7194	520M2D142N156M2I1M1D1M6131N240M	NA	NA	NA	NA	NA	NA
ac0808a6-64c6-45af-bf16-84c6b98c8b10.K562.5EU.0.unlabeled.II;0_NR_135106	chr1	+	32817628	32858876	41249	62M7623N117M668N833M1065N86M1882N104M23011N88M2757N2953M	0.379364	70.9338	153.028	0.252933	90.2796	96.78
669aeb77-d895-4f8e-a7fd-083db1a0cc03.K562.5EU.60.labeled.I;0_chr1:32840000	chr1	+	32840194	32843232	3039	3039M	NA	NA	-0.5	NA	NA	135.59
cec075aa-0b51-45f1-9bbf-a221796c964c.K562.5EU.60.labeled.I;0_NR_135106-1	chr1	+	32850047	32856233	6187	3120M2757N310M	0.0405465	110.437	174.04	0.0231049	62.6087	NA
9324f084-c912-474e-8d61-19e08a99e630.K562.5EU.60.labeled.V;16_chr1:32894000	chr1	+	32894602	32901388	6787	278M425N132M110N1M2D2M3D192M166N58M1D2155N194M1D2902N165M	0.493412	27.1953	NA	0.292311	33.9811	23.935
e33d3680-3366-46a8-980c-535b3ad9c687.K562.5EU.60.labeled.heat.III;16_chr1:32894000	chr1	+	32894602	32901388	6787	278M425N132M110N1M2D2M3D192M166N57M2D2157N192M1D2902N165M	0.0763576	46.8654	51.595	0.292311	33.9811	121.08
d30d7b16-944b-4a20-be2c-439d1dec8dbf.K562.5EU.60.labeled.heat.I;16_chr1:32894000	chr1	+	32894602	32901388	6787	331M371N133M110N1M2D2M3D192M166N58M1D2155N194M1D2902N165M	0.261554	43.6881	46.8025	0.607467	31.4818	113.17
322ea988-2fc6-4802-9efa-ef89c2cd8115.K562.5EU.0.unlabeled.III;16_chr1:32936000	chr1	+	32936463	32964802	28340	799M1137N132M3723N206M1559N138M1352N2D118M773N166M1D2M1656N142M4D1198N205M2I3M14278N746M	0.0462098	62.6087	64.2	0.225612	28.1921	141.76
023ce70a-6efd-42cb-80fe-5d2ce27cbf00.K562.5EU.60.labeled.VI;16_chr1:32936000	chr1	+	32936463	32964802	28340	799M1137N132M3723N206M1559N138M1352N2D118M773N166M1D2M1656N146M1205N198M2I3M14278N746M	0.0231049	62.6087	NA	0.0652885	78.3609	174.48
7b0f84fe-bc17-4b47-acdd-091e36bae95e.K562.5EU.60.labeled.IV;16_chr1:32936000-1	chr1	+	32936463	32964880	28418	849M1087N132M3723N206M1559N138M1352N2D118M773N166M1D2M1656N146M1205N198M2I3M14278N824M	0.369678	30.6383	39.345	0.446394	25.2805	146.345
0a346b19-a891-47f7-88e1-a899b8440d2c.K562.5EU.60.labeled.heat.I;16_chr1:33008000-2	chr1	+	33008015	33019531	11517	2819M1240N7458M	0.571931	130.888	101.325	0.712727	71.455	126.36
2e8fef9d-8a52-4619-bc5d-25d3013c3374.K562.5EU.0.unlabeled.II;16_chr1:33007000-2	chr1	+	33008883	33036851	27969	1951M2373N191M1115N2M2D3M2D72M6772N97M1D130N111M3D2M2735N119M12159N2D3M7D117M	0.763682	87.6209	77.765	0.663751	57.5596	96.19
2e8fef9d-8a52-4619-bc5d-25d3013c3374.K562.5EU.0.unlabeled.II;16_chr1:33007000-3	chr1	+	33008883	33036855	27973	1951M2373N191M1115N2M2D3M2D72M6772N97M1D130N111M3D2M2735N119M12159N2D3M7D121M	1.50027	59.6636	121.635	1.35578	48.6236	147.32
c5eae344-2e03-41b2-8f48-6942e76a4ebb.K562.5EU.60.labeled.heat.IV;16_chr1:33008000	chr1	+	33008883	33021651	12769	1951M2373N191M1115N81M6772N97M1D130N58M	0.417922	75.0342	NA	0.333375	72.0459	89.94
8518a259-cb5e-41b4-88c0-800d352da410.K562.5EU.60.labeled.VI;16_chr1:33008000-1	chr1	+	33008883	33036855	27973	1946M2378N191M1115N2M2D3M2D72M6772N97M1D130N111M3D2M2735N119M12159N2D3M7D121M	0.291037	96.572	71.445	0.192901	83.6441	136.1
e8f7a7fc-b9eb-4f04-98ea-dcf89a7ef379.K562.5EU.0.unlabeled.III;16_chr1:33009000	chr1	+	33009922	33036855	26934	912M1240N1324M1115N2M2D3M2D72M6772N97M1D130N111M3D2M2735N119M12159N2D3M7D121M	1.47918	37.5028	89.645	0.850015	45.4235	97
bfcc5c9d-5836-4262-bec2-0c2f5c91d930.K562.5EU.60.labeled.IV;16_chr1:33009000	chr1	+	33009922	33036851	26930	912M2373N191M1115N2M2D3M2D72M6772N97M1D130N114M2D15030N112M	0.0367896	242.092	29.205	0.0693147	62.6087	NA
101b6763-c8ab-4b31-8a85-d506c41a0c18.K562.5EU.60.labeled.heat.III;16_chr1:33009000	chr1	+	33009922	33036855	26934	912M2373N191M1115N2M2D3M2D72M6772N97M1D130N116M2735N1I119M12159N2D3M7D121M	0.152715	46.8654	NA	0.310174	36.6657	149.92
2e8fef9d-8a52-4619-bc5d-25d3013c3374.K562.5EU.0.unlabeled.II;16_chr1:33007000	chr1	+	33009922	33036855	26934	912M2373N191M1115N2M2D3M2D72M6772N97M1D130N111M3D2M2735N119M12159N2D3M7D121M	0.479584	55.5389	73.1375	0.446963	43.1254	133.32
1c94d78c-ca2c-46af-a72b-0373178d512c.K562.5EU.1440.labeled.II;16_chr1:33009000	chr1	+	33009932	33013394	3463	2408M865N190M	0.0178042	397.408	NA	NA	NA	NA
fbf557e3-c77e-405c-8d74-4af23da3d861.K562.5EU.1440.labeled.I;16_chr1:33010000-2	chr1	+	33010060	33036851	26792	3338M1115N2M2D3M2D72M22141N117M	NA	NA	NA	NA	NA	NA
3bcb1a52-2301-43e9-88ef-9a0e75e35a24.K562.5EU.0.unlabeled.I;16_chr1:33010000-2	chr1	+	33010060	33036851	26792	3338M1115N2M2D3M2D72M6772N97M1D130N111M3D2M2735N119M6966N3M10D121M5074N114M	0.127706	86.2938	110.812	0.175094	49.1253	NA
3bcb1a52-2301-43e9-88ef-9a0e75e35a24.K562.5EU.0.unlabeled.I;16_chr1:33010000	chr1	+	33013046	33036855	23810	352M1115N2M2D3M2D72M6772N97M1D130N111M3D2M2735N119M6966N3M10D121M5074N118M	0.127706	86.2938	58.6925	0.164792	38.8778	80.875
f75bb7e1-7a6f-485f-a6d9-a178351f07c4.K562.5EU.60.labeled.VI;16_chr1:33009000	chr1	+	33013046	33036855	23810	352M1115N2M2D3M2D72M6998N113M3D2M2735N119M12159N2D3M7D121M	0.0988514	50.8162	8.0425	0.179176	23.5914	62.55
3b913394-a6e1-4de9-8d28-b4fd8d1f1afd.K562.5EU.1440.labeled.II;16_chr1:33013000	chr1	+	33013046	33036855	23810	352M1115N2M2D3M2D72M6772N97M1D130N116M2735N1I119M12159N2D3M7D121M	0.179176	23.5914	NA	0.0462098	62.6087	NA
86260975-e41e-4aa5-a04d-8b782981279d.K562.5EU.60.labeled.heat.V;16_chr1:33013000	chr1	+	33013046	33036855	23810	352M1115N2M2D3M2D72M6772N43M3036N119M6966N3M10D121M5074N118M	0.0231049	62.6087	-0.5	NA	NA	-1
3378b4e2-1b15-492a-95bf-1bf6d49ee0da.K562.5EU.0.unlabeled.III;16_chr1:33013000	chr1	+	33013046	33036851	23806	1548M6772N97M1D130N111M3D2M2735N119M12159N2D3M7D117M	0.490358	45.1955	21.8575	0.152715	46.8654	95.14
655d3da0-3691-4801-8525-7e67cdba6f17.K562.5EU.60.labeled.IV;0_NM_152493	chr1	+	33294958	33300716	5759	58M131N159M3624N1787M	0.0462098	62.6087	NA	NA	NA	NA
bd29cb29-7b4c-4953-aa7e-9e4c0a480396.K562.5EU.60.labeled.heat.II;16_chr1:33323000	chr1	+	33323626	33349895	26270	1397M1D4M3849N270M924N138M1135N121M5D807N125M1780N117M5D2M1D15298N291M	0.852976	48.7269	93.175	0.542423	58.511	107.2
29cc9ee1-d38e-44aa-919a-4d4b5cbd2c44.K562.5EU.60.labeled.heat.IV;0_chr1:33350000	chr1	+	33350068	33363236	13169	380M12618N171M	NA	NA	NA	0.179176	23.5914	NA
bddca5aa-a708-4404-ab7e-a31bcf2433e3.K562.5EU.60.labeled.II;0_chr1:33354000	chr1	+	33354111	33355359	1249	1249M	NA	NA	NA	NA	NA	NA
ea7fa526-be86-4c17-b414-65d4bc683147.K562.5EU.60.labeled.heat.II;0_NM_145238	chr1	+	33479176	33495652	16477	530M8759N187M463N77M326N85M1422N678M1484N429M602N1435M	NA	NA	NA	NA	NA	NA
ef8a91fb-6cb1-4e7b-b9b4-f67635494b41.K562.5EU.0.unlabeled.II;16_chr1:34853000-2	chr1	+	34853517	34859726	6210	2466M3694N50M	0.37092	42.3201	46.095	0.0785102	135.208	153.625
b0b04847-6a74-4103-8d8f-ac38a0997c64.K562.5EU.0.unlabeled.II;16_chr1:34855000	chr1	+	34855046	34859726	4681	934M3470N2D275M	0.116766	143.621	NA	0.152715	46.8654	43.88
ef8a91fb-6cb1-4e7b-b9b4-f67635494b41.K562.5EU.0.unlabeled.II;16_chr1:34853000-1	chr1	+	34855046	34859761	4716	937M3694N85M	0.180957	115.884	133.87	0.0976267	140.246	59.05
07caf160-7164-4822-98c9-dd79b6c96a97.K562.5EU.60.labeled.I;16_chr1:34981000	chr1	+	34981535	34985314	3780	584M1647N183M5D1245N116M	0.773222	59.7528	113.108	0.498784	66.8946	91.52
325cefaf-3756-4eeb-9229-323e61104dca.K562.5EU.60.labeled.heat.IV;0_chr1:34984000	chr1	+	34984938	34985786	849	849M	NA	NA	NA	0.0231049	62.6087	NA
01d6f5ec-ccd6-4319-ad58-65c25fd76514.K562.5EU.60.labeled.VI;16_chr1:34987000	chr1	+	34986983	35031926	44944	1947M3295N1M1D5M2D154M2D1M11578N39M1D2M1125N137M1678N136M1657N6M4I175M1522N148M1288N1M1D1M3D118M1D2M424N148M2115N194M1I2M100N170M4190N250M780N84M11347N113M	0.0652885	78.3609	71.21	0.0178042	397.408	145.83
60683142-8ddd-40f9-8f8d-d91d7dfaa8f6.K562.5EU.60.labeled.I;16_chr1:34987000	chr1	+	34987026	35031950	44925	1904M3295N1M1D5M2D154M2D1M11578N39M1D2M1125N137M1678N156M1D4M1652N161M1522N150M160N277M849N2M2D1M2D117M1D2M424N148M2115N194M1I2M100N170M4190N250M780N84M10079N165M1101N139M	0.0626672	94.2796	NA	0.0405465	110.437	184.82
80843781-ff00-4b84-9383-d309b1b82b08.K562.5EU.1440.labeled.II;16_chr1:34988000	chr1	+	34988191	35031915	43725	2124M1919N154M2D1M11578N39M1D2M1125N137M1678N156M1D4M1652N161M1522N148M1288N1M1D1M3D118M1D2M424N148M2115N194M1I2M100N170M4190N250M780N84M10079N211M510N73M477N99M	NA	NA	NA	0.0202733	110.437	NA
2397474f-031e-4827-ae6a-19351c951b2d.K562.5EU.60.labeled.I;16_chr1:35017000	chr1	+	35017252	35018033	782	782M	0.0179842	331.995	79.8	NA	NA	NA
eb357e46-8e95-4eb6-87d2-24e0e3b939e0.K562.5EU.60.labeled.IV;0_NM_001319955	chr1	+	35097958	35118818	20861	6512M87N213M5524N154M1324N141M174N44M846N5842M	0.0767152	160.698	198.852	0.199279	73.0968	192.59
225c1926-1ee8-4888-8e09-abe118c52ed1.K562.5EU.60.labeled.heat.IV;16_chr1:35175000-2	chr1	+	35175639	35181864	6226	835M1I1M848N76M1D2M588N44M3098N733M	0.0924196	30.6383	NA	NA	NA	NA
371a535b-d410-4cb9-8b6f-9fe2aa4aa7a4.K562.5EU.60.labeled.heat.I;16_chr1:35175000-1	chr1	+	35175660	35178318	2659	1739M1D2M588N329M	0.0608198	110.437	NA	0.0376972	186.972	161.28
1d173a72-e0a6-45c7-b0ec-3d6a523b653a.K562.5EU.60.labeled.VI;16_chr1:35176000	chr1	+	35176385	35192824	16440	93M7D1M837N76M1D2M588N6599M2402N1M1D3M4D123M80N49M721N117M912N86M98N196M1115N97M100N302M2D343N185M688N2M3D1M1D604M	0.993208	67.9669	127.09	0.403124	87.551	129.565
9b4563d1-2bc3-4341-8c53-3e7d774dbf1f.K562.5EU.60.labeled.IV;16_chr1:35176000	chr1	+	35176385	35193133	16749	93M7D1M837N76M1D2M588N43M8958N6D126M80N49M721N117M912N86M98N196M1115N97M100N302M2D343N185M688N2M3D1M1D913M	0.493412	27.1953	59.1	0.317706	28.9322	62.17
3eeea4ab-f056-4f96-9c46-fb43f548fc60.K562.5EU.0.unlabeled.II;16_chr1:35176000	chr1	+	35176385	35193133	16749	93M7D1M837N76M1D2M588N44M3098N3457M2402N1M1D3M4D123M80N49M721N117M912N86M98N196M1115N97M100N302M2D343N185M688N2M3D1M1D913M	1.71133	50.3019	116.855	0.519356	58.3248	129.22
55655b12-3b28-4dd8-a89a-eea4bc7b2221.K562.5EU.0.unlabeled.I;16_chr1:35176000	chr1	+	35176385	35193133	16749	89M1I1M848N76M1D2M588N43M8958N6D255M721N1115M98N196M1115N97M100N302M2D343N185M688N2M3D1M1D913M	0.26824	26.3128	140.95	NA	NA	158.97
3a050faa-d96d-40e7-935b-e4b25ac94705.K562.5EU.0.unlabeled.II;16_chr1:35176000	chr1	+	35176385	35191418	15034	93M7D1M837N9800M80N49M721N117M912N86M98N196M1115N97M100N302M2D343N78M	0.550853	88.1317	121.328	0.601578	48.8431	187.97
854b2f60-836e-4fd5-8ee7-36c1ba8398b5.K562.5EU.60.labeled.heat.IV;16_chr1:35176000	chr1	+	35176385	35190790	14406	89M1I1M848N76M1D2M588N9133M80N49M721N117M912N86M98N196M1115N97M100N97M	0.463318	90.6426	137.315	0.547832	49.7405	121.55
2e2f4bb6-1d9b-411f-9e56-9f2b10d357a2.K562.5EU.0.unlabeled.II;16_chr1:35176000	chr1	+	35176385	35187251	10867	93M7D1M837N76M1D2M588N9133M80N49M	0.378234	91.6113	152.303	0.0361951	300.991	206.33
869a79f6-ed5f-4d3d-8874-ef844baa13d0.K562.5EU.1440.labeled.II;16_chr1:35176000	chr1	+	35176393	35191465	15073	85M7D1M837N76M1D2M588N42M9166N54M721N117M912N86M98N196M1115N97M100N302M2D343N125M	NA	NA	NA	NA	NA	NA
72d2182e-b6ab-4b0c-82c5-dffed568fe26.K562.5EU.1440.labeled.II;16_chr1:35176000	chr1	+	35176394	35191250	14857	1638M9936N1120M98N196M1115N97M100N557M	0.0202733	110.437	NA	0.0763576	46.8654	101.48
a388f2af-7070-47a0-ac7b-c91916f02895.K562.5EU.60.labeled.IV;16_chr1:35176000	chr1	+	35176395	35192613	16219	79M1I1M848N76M1D2M588N6599M2402N1M1D3M4D123M80N49M721N117M912N86M98N196M1115N97M100N302M2D343N185M688N2M3D1M1D393M	0.360515	118.619	111.41	0.30543	46.8654	108.37
8e0ac2d9-8665-47ff-9681-3caa03026214.K562.5EU.60.labeled.heat.I;16_chr1:35176000	chr1	+	35176395	35191465	15071	83M7D1M837N76M1D2M588N45M628N5926M2402N1M1D3M4D123M80N49M721N117M912N86M98N196M1115N97M100N302M2D343N125M	0.429571	67.5718	99.7975	0.152715	46.8654	NA
e16c87d2-05e0-4ef3-ba67-d4dbc218929c.K562.5EU.60.labeled.I;16_chr1:35176000	chr1	+	35176410	35189379	12970	68M7D1M837N710M8958N6D255M721N117M912N86M98N194M	NA	NA	NA	NA	NA	NA
a7aad31d-9a8d-470c-8b4c-42f7957422e0.K562.5EU.60.labeled.V;16_chr1:35183000	chr1	+	35184130	35193133	9004	467M7D1M2347N1I171M80N49M721N117M912N86M98N196M1115N97M100N302M2D343N185M688N2M3D1M1D913M	0.401324	35.392	28.1875	0.402359	26.3128	60.79
669a286b-ff98-48b1-867a-6f8d7f7c9e77.K562.5EU.60.labeled.IV;0_NM_005095	chr1	+	35268700	35423212	154513	390M26837N62M9575N123M19673N46M44623N85M258N256M10631N175M112N213M3683N151M481N116M813N276M175N151M1305N173M865N151M2113N141M294N38M910N145M2812N119M706N169M867N54M397N180M438N95M5446N172M178N96M2539N152M5812N112M1382N249M2728N130M897N3743M	0.165728	98.2946	118.433	0.141913	110.437	100.17
ac617abe-a05e-45fa-a791-57df62e09c94.K562.5EU.60.labeled.IV;0_chr1:35268000	chr1	+	35268704	35274053	5350	5350M	0.0462098	62.6087	63.0975	0.0231049	62.6087	NA
285d4700-3bf9-4d4f-9faf-453d264eb7eb.K562.5EU.60.labeled.IV;0_NM_005095	chr1	+	35268774	35372254	103481	321M56265N46M33519N522M1747N62M363N171M8242N82M258N1883M	0.0405465	110.437	NA	0.0462098	62.6087	NA
c45dcb23-733f-4dd7-bc3c-a026d24f8205.K562.5EU.60.labeled.V;0_NM_005095	chr1	+	35268949	35421943	152995	141M26837N62M29371N46M33519N522M1747N62M363N171M8239N85M258N256M10631N175M112N213M3683N151M481N116M813N276M175N151M1305N173M865N151M2113N141M294N38M910N145M2812N119M706N169M867N54M397N180M438N95M5446N172M178N96M2539N152M5812N112M1382N249M2728N130M897N2474M	0.0976267	140.246	58.0575	0.170275	86.2938	164.715
1cffdcc9-c543-4506-81bb-c106132f2385.K562.5EU.60.labeled.I;0_chr1:35350000	chr1	+	35350960	35351609	650	650M	NA	NA	NA	NA	NA	NA
a046f666-d1a0-49fc-a8b1-b754b48cb430.K562.5EU.60.labeled.heat.V;0_NM_005095	chr1	+	35359410	35420188	60779	37M1747N62M363N171M19469N175M112N213M3683N151M481N116M813N276M1631N173M865N151M2113N141M294N38M910N145M3637N169M867N54M397N180M438N95M5446N172M178N96M2539N152M5812N112M1382N249M3755N719M	NA	NA	NA	NA	NA	NA
d8b719ac-48ba-4ab1-993f-e035639ff048.K562.5EU.60.labeled.heat.IV;16_chr1:35433000	chr1	+	35433490	35557399	123910	1590M5958N1M7D92M1107N92M569N123M1D5M1132N1I134M3868N2M1D162M5D2M3D1526N137M1D351N151M1118N148M1780N137M672N120M1527N230M4063N126M2178N4D5M1D95M3894N92M1I4M4168N95M3844N96M4059N241M27396N1D3M2D526M47212N1M2D165M2843N4M1I38M	0.101366	110.437	103.463	0.152715	46.8654	218.22
8856c8bf-4c02-42a4-9630-cc9b21024f58.K562.5EU.60.labeled.heat.I;16_chr1:35433000	chr1	+	35433490	35557390	123901	1590M5958N1M7D92M1107N92M569N123M1D5M1132N1I134M3868N2M1D162M5D2M3D1526N137M1D351N151M1118N148M1780N137M672N120M1527N230M4063N126M2178N4D5M1D95M3894N92M1I4M4168N95M3844N96M4059N241M27396N1D3M2D526M47212N1M2D165M2688N4M1I184M	0.162186	110.437	46.6275	0.0976267	140.246	191.05
c1c734da-731b-4cd0-8e8d-29bc96120602.K562.5EU.60.labeled.VI;16_chr1:35524000	chr1	+	35524698	35526496	1799	1799M	NA	NA	NA	0.0231049	62.6087	NA
18fef98c-1a7e-47ed-a54c-9a6eea5e7ac6.K562.5EU.60.labeled.II;0_NM_001014841	chr1	+	35557478	35566779	9302	1208M421N141M1078N969M1097N242M568N225M340N143M1317N1553M	0.261154	78.3609	148.215	0.130777	43.6881	63.135
NM_001014839_001014841	chr1	+	35557793	35566779	8987	91M272N68M883N141M1078N969M1097N242M568N225M340N143M1317N1553M	0.0924196	62.6087	54.775	0.0405465	110.437	NA
831c1325-67a1-4284-8764-3388a1669e49.K562.5EU.1440.labeled.II;16_chr1:35569000	chr1	+	35569813	35641498	71686	106M39326N164M21865N72M2D4963N122M4909N157M	NA	NA	18.94	NA	NA	NA
b4f7e6a1-bf33-4249-aa9e-376a313c0e63.K562.5EU.1440.labeled.III;16_chr1:35569000	chr1	+	35569817	35570923	1107	1107M	NA	NA	NA	NA	NA	NA
7fc77032-2ad3-44f7-8fdf-4888a6542be6.K562.5EU.60.labeled.VI;16_chr1:35592000	chr1	+	35592377	35595708	3332	3332M	0.0191788	160.698	NA	NA	NA	NA
c22b0579-0d9b-40c2-b3a9-e1361df096b8.K562.5EU.60.labeled.IV;16_chr1:35601000-2	chr1	+	35601584	35641498	39915	1791M1858N50M3963N163M21865N72M1D1M9996N155M	0.422705	158.349	85.605	0.423163	88.6836	60.93
4189b8fb-8f08-45e3-a8e1-6f8143fcb090.K562.5EU.60.labeled.IV;16_chr1:35599000-2	chr1	+	35601819	35641498	39680	1556M1858N50M3963N163M21865N72M2D4963N122M4909N157M	2.79944	57.4169	85.38	1.45925	65.5548	97.25
4189b8fb-8f08-45e3-a8e1-6f8143fcb090.K562.5EU.60.labeled.IV;16_chr1:35599000-3	chr1	+	35601819	35641484	39666	1556M1858N50M3963N163M21865N72M2D4963N122M4909N143M	1.32446	49.253	66.48	0.98062	51.9983	79.125
296d3226-0b13-4cc0-bc68-9827cbe07cbc.K562.5EU.1440.labeled.II;16_chr1:35603000	chr1	+	35603139	35641498	38360	236M1858N50M3963N163M21865N72M2D4959N126M4909N157M	0.088168	74.4112	-1	0.200662	35.392	-1
46684151-8b92-4ff8-9031-d2239491d316.K562.5EU.0.unlabeled.III;16_chr1:35603000	chr1	+	35603139	35641498	38360	236M1858N50M3963N163M21865N72M2D4963N122M4984N82M	0.401324	35.392	80.615	0.330439	32.1677	33.85
4189b8fb-8f08-45e3-a8e1-6f8143fcb090.K562.5EU.60.labeled.IV;16_chr1:35599000-1	chr1	+	35603139	35641532	38394	236M1858N50M3963N163M21865N72M2D4963N122M4909N191M	4.16595	52.9584	82.3675	3.03364	51.1046	107.52
f4e69109-5cfa-44d6-a01f-da6dbb6d055e.K562.5EU.60.labeled.heat.IV;16_chr1:35603000-2	chr1	+	35603148	35641532	38385	227M5871N163M21865N72M2D4963N122M4909N191M	0.0231049	62.6087	NA	NA	NA	NA
713b4f7c-9196-4070-af3d-6289a69bc3e9.K562.5EU.0.unlabeled.I;16_chr1:35713000-1	chr1	+	35713881	35719087	5207	2446M2D2378N381M	0.251403	48.448	152.148	0.18546	42.3201	188.345
a12abb9c-0461-46a6-ba55-c08e9402beb7.K562.5EU.60.labeled.I;16_chr1:35734000	chr1	+	35734244	35769955	35712	2365M1D3M306N155M263N85M570N102M349N3M8D127M551N2M2D121M107N165M3611N101M213N77M6D1M1914N111M1203N220M914N164M2I1M345N199M862N57M101N181M1436N2D257M2238N191M6402N1M1D2M2D573M179N111M793N72M333N79M678N164M2D942N447M503N111M1I2M4521N104M	0.147743	89.7093	158.93	0.229073	46.8654	147.04
9e779ff2-223e-49e7-9d53-4925f164efc2.K562.5EU.60.labeled.heat.V;0_NM_017629	chr1	+	35808035	35857673	49639	401M14426N121M2330N182M184N137M110N135M687N88M4591N148M237N120M125N129M251N134M1419N185M1659N160M5171N316M135N135M8406N102M595N200M2443N4177M	0.12164	110.437	96.47	0.088168	74.4112	82.02
3b9e8570-33ad-4916-b9d1-4d6b4c4a471b.K562.5EU.0.unlabeled.II;0_chr1:35853000	chr1	+	35857145	35857854	710	710M	NA	NA	NA	NA	NA	NA
b020d984-0735-49d3-8376-c7a431d11fd5.K562.5EU.60.labeled.heat.I;0_NM_001317122	chr1	+	35908936	35973565	64630	5066M182N91M1073N195M2050N135M594N102M631N200M244N202M11528N217M14246N172M21091N121M4948N209M649N93M400N191M	0.0763576	46.8654	56.215	0.164792	38.8778	88
26e68a20-3b25-4d2c-8d04-0ec63ea63fab.K562.5EU.60.labeled.heat.III;0_chr1:35920000	chr1	+	35928582	35930506	1925	1925M	0.215599	81.5283	88.91	0.0796737	122.738	93.665
a0d5fc05-4c42-4da6-ab5c-80ab1f47df6c.K562.5EU.60.labeled.IV;0_NM_024852	chr1	+	35930736	35986377	55642	63M14893N172M21091N121M4948N209M1142N137M9109N92M1757N1908M	NA	NA	161.52	0.0549306	38.8778	NA
e309b26e-2cd7-40c1-8674-ddc661055480.K562.5EU.60.labeled.IV;0_NM_024852	chr1	+	35931109	35986377	55269	337M14246N172M21091N121M4948N209M1142N137M10958N1908M	0.0549306	38.8778	25.595	NA	NA	NA
NM_024852_177422	chr1	+	35931109	36056102	124994	337M14246N172M21091N121M4948N209M1142N137M30829N135M4214N88M119N148M430N120M4035N123M162N134M13065N185M6875N160M1843N91M3522N195M322N135M3005N102M11397N200M491N466M	0.0191788	160.698	NA	0.0179842	331.995	NA
f9d0dd4d-31f5-4856-981f-bcd8dca81493.K562.5EU.60.labeled.I;0_chr1:36055000	chr1	+	36055607	36056459	853	853M	NA	NA	NA	NA	NA	NA
5571e7e2-8ca4-4f02-a03c-83cccb663313.K562.5EU.60.labeled.VI;0_chr1:36058000	chr1	+	36058925	36062884	3960	3960M	NA	NA	NA	NA	NA	NA
633fc468-7d12-40f8-ad02-85e6c4237eeb.K562.5EU.60.labeled.VI;0_chr1:36066000	chr1	+	36071296	36072479	1184	1184M	0.144551	54.7527	103.795	0.0549306	38.8778	NA
a4728679-bf7e-4a2c-9fe1-fd4cff65a4be.K562.5EU.1440.labeled.II;0_NM_017825	chr1	+	36088903	36093931	5029	213M2128N97M277N477M327N101M574N835M	0.159347	122.738	81.3	0.134125	70.4707	87.74
NM_017825_017825-2	chr1	+	36088903	36093931	5029	213M2128N97M277N208M84N185M327N101M574N835M	0.235462	84.1254	77.9525	0.146156	33.9811	68
ed404acb-cf19-453a-9dc7-6d09a6174e52.K562.5EU.60.labeled.IV;16_chr1:36136000-1	chr1	+	36136581	36149485	12905	740M473N187M1741N97M249N99M8925N394M	1.10904	30.6383	79.105	1.5421	19.5907	123.15
72ded6f9-c2b5-4c96-b6e2-9e33c2c625cd.K562.5EU.60.labeled.IV;16_chr1:36136000-1	chr1	+	36136581	36149485	12905	740M473N187M1741N97M249N98M9167N1M3D149M	1.16912	37.7216	96.6375	1.08651	28.6282	119.41
fda2224a-c6f4-475c-929d-9543bc25da1d.K562.5EU.0.unlabeled.III;16_chr1:36136000	chr1	+	36136581	36149485	12905	3238M9514N3D150M	0.200662	35.392	60.29	0.134125	70.4707	180.56
4a427be0-040c-4a7c-a5b5-4cfabb8cf73e.K562.5EU.1440.labeled.II;16_chr1:36136000-1	chr1	+	36136581	36149557	12977	740M12012N2D223M	0.0231049	62.6087	NA	NA	NA	NA
4c6c4839-ad90-4584-8f34-7682e3346b22.K562.5EU.60.labeled.heat.I;16_chr1:36136000	chr1	+	36136581	36149460	12880	740M473N187M1741N89M9522N3M5I125M	0.164792	38.8778	26.7675	0.184839	30.6383	95.265
67d9c5c8-2a8c-4967-b03f-e19c7ba94de5.K562.5EU.60.labeled.IV;16_chr1:36136000	chr1	+	36136581	36149460	12880	740M473N187M1741N122M225N97M9167N1M3D124M	0.152715	46.8654	7.7125	0.0191788	160.698	NA
213393a7-63df-40ca-b93d-e3bb72d12238.K562.5EU.0.unlabeled.III;0_NM_001286365	chr1	+	36156164	36180849	24686	300M14507N345M197N69M882N164M736N115M1419N111M1190N383M115N146M1030N329M217N178M88N139M97N105M236N54M199N43M108N91M117N194M180N602M	0.291272	69.8651	76.155	0.0967042	150.411	99.24
NM_001286365_001286365	chr1	+	36156191	36180849	24659	273M14507N345M197N69M882N164M736N115M2720N383M115N146M1030N329M217N178M88N139M97N105M236N54M199N43M108N91M117N194M180N602M	0.206189	100.711	14.16	0.0594458	126.875	40.81
0fe9eaba-90f0-4663-b786-8870451dcec1.K562.5EU.0.unlabeled.I;0_NM_001286365	chr1	+	36156191	36180849	24659	273M14507N345M197N69M882N164M736N115M1419N111M1190N123M96N164M115N146M1030N329M217N178M88N139M97N105M236N54M196N46M108N91M117N194M180N602M	0.0178042	397.408	NA	0.0626672	94.2796	86.58
NM_005119_005119	chr1	+	36224439	36305357	80919	67M34876N103M23048N168M3667N903M4D1785N705M1609N173M1051N112M1141N85M2647N188M4115N199M468N144M2099N1562M	0.501337	94.2796	99.7925	0.110741	232.654	104.79
9600c2f8-5d84-45b1-b54f-507a06fa95cc.K562.5EU.1440.labeled.II;0_NM_005119	chr1	+	36289672	36304571	14900	93M1609N173M1051N112M3873N188M4115N199M468N3019M	0.0202733	110.437	NA	NA	NA	NA
2963e1e8-4a7d-4fb8-85f4-23c0b2f383fa.K562.5EU.0.unlabeled.I;0_NM_005119	chr1	+	36294173	36305357	11185	2598M4115N199M471N141M2099N1562M	0.224647	106.004	64.555	0.118892	126.875	120.185
166e1aef-b6d9-4d58-a0f4-9a774eeef389.K562.5EU.60.labeled.VI;16_chr1:36322000	chr1	+	36322031	36323630	1600	695M733N172M	0.584512	22.8894	NA	0.277259	30.6383	NA
d58fca47-a10d-4a33-bbb7-fa491c7a48b1.K562.5EU.60.labeled.heat.I;16_chr1:36322000	chr1	+	36322031	36323630	1600	695M245N98M1D5M390N166M	0.590157	41.0724	31.575	0.804202	38.0411	110.96
ab863c98-e889-4fd7-b7ab-68e2f0aa7be9.K562.5EU.60.labeled.heat.II;0_chr1:36326000	chr1	+	36328002	36330231	2230	2230M	0.0191788	160.698	NA	0.0405465	110.437	NA
88ae8c02-570e-4728-83a4-f8e9d06639e3.K562.5EU.0.unlabeled.I;16_chr1:36339000	chr1	+	36339623	36385912	46290	2350M1390N85M411N119M1D6M139N140M4435N112M5544N1M2D3M2D56M789N230M5D2M3D1M2797N143M354N75M2395N3M3D122M24382N190M	1.11393	57.5954	56.505	0.762726	69.5446	118.99
6eda959b-f640-4d3f-9eca-ae88fd709d5b.K562.5EU.60.labeled.III;16_chr1:36384000	chr1	+	36384423	36384633	211	211M	0.0231049	62.6087	-0.5	NA	NA	NA
e5fb6651-ad2e-4f7e-8b10-8a34aa571204.K562.5EU.60.labeled.IV;0_chr1:36386000	chr1	+	36386234	36387732	1499	1499M	NA	NA	NA	NA	NA	NA
80ca50ac-e756-418b-a946-9538d846e863.K562.5EU.1440.labeled.II;16_chr1:36393000	chr1	+	36393437	36397894	4458	714M5D3612N127M	0.146156	33.9811	NA	0.179176	23.5914	103.78
bb859bd4-a788-447a-a896-bbf3e39e0c17.K562.5EU.60.labeled.heat.I;16_chr1:36393000	chr1	+	36393437	36397894	4458	718M1D3612N127M	1.86739	33.0339	83.42	1.69697	25.778	108.18
cd870a4e-9873-4b28-ad53-ea067bc79b95.K562.5EU.60.labeled.heat.IV;16_chr1:36393000	chr1	+	36393437	36397894	4458	719M1499N104M1999N9M1I128M	0.554518	20.2817	61.2525	0.462098	30.6383	66.925
6a7abd72-9d34-4ad8-a0a3-6b5874905e0d.K562.5EU.60.labeled.heat.IV;16_chr1:36448000	chr1	+	36448444	36450984	2541	2541M	NA	NA	NA	NA	NA	NA
b77ba128-a0a7-4599-921d-b08795cae690.K562.5EU.1440.labeled.II;16_chr1:36455000-1	chr1	+	36455334	36464287	8954	590M261N191M1540N1D2M3D60M5824N43M289N6D144M	0.227023	21.6944	-1	0.13412	26.3128	NA
bb9fc9da-6afa-4a08-a506-d709ab9f3197.K562.5EU.0.unlabeled.I;16_chr1:36455000	chr1	+	36455774	36464360	8587	150M261N191M1540N1D2M3D60M2710N87M487N45M1D3M774N77M1642N41M289N6D217M	3.44972	37.099	82.665	2.36751	39.7121	76
bb9fc9da-6afa-4a08-a506-d709ab9f3197.K562.5EU.0.unlabeled.I;16_chr1:36455000-1	chr1	+	36455774	36464343	8570	150M261N191M1540N1D2M3D60M2710N87M487N45M1D3M774N77M1642N41M289N6D200M	1.10224	52.1296	99.81	0.839764	37.2576	82.15
900113be-8caa-4017-bf34-7f6b876b7192.K562.5EU.60.labeled.IV;16_chr1:36455000-2	chr1	+	36455774	36464360	8587	150M261N191M1540N1D2M3D60M2710N87M487N49M2493N41M289N6D217M	0.219722	38.8778	59.625	0.12164	53.1793	77.335
7231f90c-5271-4aac-a969-19dcfb1ce7ec.K562.5EU.0.unlabeled.II;16_chr1:36455000	chr1	+	36455774	36464360	8587	150M261N191M1540N1D2M3D60M2706N91M487N45M1D3M774N77M1642N41M289N6D217M	0.439614	17.5553	4.365	NA	NA	NA
4d9e211e-6be4-4f8c-91da-4db0689dd663.K562.5EU.60.labeled.IV;16_chr1:36455000	chr1	+	36455774	36464343	8570	150M261N191M1540N1D2M3D60M3282N47M1D3M774N77M1642N41M289N6D200M	NA	NA	26.23	NA	NA	NA
7f26e99e-e7b2-497f-b42d-4ba3f628c0b8.K562.5EU.1440.labeled.II;16_chr1:36455000	chr1	+	36455774	36464343	8570	150M261N191M1540N1D2M3D60M4106N78M1642N41M289N6D200M	0.0549306	38.8778	NA	NA	NA	NA
523cad74-b45d-4770-822a-f164f9dce35b.K562.5EU.0.unlabeled.II;16_chr1:36455000	chr1	+	36455774	36464343	8570	150M261N191M1540N1D2M3D60M2710N87M3029N41M289N6D200M	0.26824	26.3128	-0.5	NA	NA	52.78
31c9f0c6-30a5-49e7-98f2-ef44a4c915f7.K562.5EU.0.unlabeled.II;16_chr1:36455000	chr1	+	36455774	36464360	8587	150M261N191M1551N55M2710N87M487N45M1D3M774N77M1642N41M289N6D217M	NA	NA	NA	0.0988514	50.8162	-1
b77ba128-a0a7-4599-921d-b08795cae690.K562.5EU.1440.labeled.II;16_chr1:36455000	chr1	+	36455774	36464343	8570	150M261N191M1540N1D2M3D60M5824N43M289N6D200M	0.179176	23.5914	NA	NA	NA	NA
02691cd1-32db-4c1f-b4c0-21838bdd5cc9.K562.5EU.0.unlabeled.II;16_chr1:36455000	chr1	+	36455804	36461731	5928	120M261N191M1540N1D2M3D2857M487N466M	0.0549306	38.8778	NA	0.0185953	214.086	NA
b1488867-c7fa-402b-b6cc-8c02e55477f3.K562.5EU.60.labeled.heat.I;16_chr1:36455000	chr1	+	36455804	36464343	8540	120M261N191M1540N1D2M3D60M2710N87M490N42M1D3M774N77M1642N41M289N6D200M	0.227023	21.6944	28.685	0.0462098	62.6087	NA
641d0daa-dab1-4343-a9b6-dd0f8e04613d.K562.5EU.60.labeled.IV;16_chr1:36466000	chr1	+	36466079	36482203	16125	120M419N1M1D207M402N83M246N97M2D168N136M5D3M2D1M105N145M934N99M2D3M386N6D188M1592N217M419N73M1D97N156M125N167M748N187M141N125M4D2M1485N295M5D3754N86M1962N1I59M516N148M	0.0176675	467.806	75.195	0.0185953	214.086	73.32
3a7f4e05-ae82-422d-8b02-9c76a7d0c5f7.K562.5EU.60.labeled.V;16_chr1:37493000-3	chr1	+	37493182	37501061	7880	926M1779N2I5175M	0.0557859	214.086	44.1725	0.0976267	140.246	117
bd4fb177-0643-4a48-9ac5-821741747a93.K562.5EU.60.labeled.heat.I;16_chr1:37492000	chr1	+	37493182	37514775	21594	926M1779N2I34M5885N190M7281N47M133N2I86M3880N111M1115N3D124M	0.166111	232.654	117.722	0.130167	214.086	95.535
975ca5e0-d77e-41e0-a229-407821ed4c3f.K562.5EU.60.labeled.heat.V;16_chr1:37493000	chr1	+	37493182	37514781	21600	926M1779N2I34M628N54M5199N194M7281N47M133N2I86M3880N111M1115N3D130M	0.163258	290.894	14.0275	0.173397	154.968	120.985
bd4fb177-0643-4a48-9ac5-821741747a93.K562.5EU.60.labeled.heat.I;16_chr1:37492000-3	chr1	+	37493303	37514781	21479	805M1779N2I34M5885N190M7281N47M133N2I86M3880N111M1115N3D130M	0.0352215	505.059	45.485	0.0351202	543.791	128.22
e4978c26-32d7-4ce4-9e49-27926dcf8576.K562.5EU.60.labeled.IV;0_chr1:37519000	chr1	+	37519055	37523006	3952	3952M	0.0202733	110.437	NA	0.0231049	62.6087	NA
93d3237c-7636-431c-a4e5-94f3759e6e4b.K562.5EU.1440.labeled.II;16_chr1:37536000	chr1	+	37536542	37554281	17740	1470M2144N599M11889N102M1258N278M	0.236618	57.8963	56.605	0.180197	68.5032	161.91
22af9586-58e5-444e-97f9-bc7c2efd6b9a.K562.5EU.0.unlabeled.III;0_chr1:37545000	chr1	+	37545232	37545458	227	227M	NA	NA	NA	NA	NA	NA
fb60e33b-9268-4fe0-8ba4-2ae4634f1391.K562.5EU.1440.labeled.II;0_chr1:37556000	chr1	+	37556227	37556548	322	322M	NA	NA	NA	NA	NA	NA
NM_003462_003462-1	chr1	+	37556941	37565153	8213	135M527N146M1578N170M2060N179M345N165M2780N128M	NA	NA	NA	NA	NA	NA
ee27a6e0-9cd7-4aee-aa2e-2fbd9a277aa5.K562.5EU.60.labeled.VI;16_chr1:37566000	chr1	+	37566824	37569039	2216	938M513N3I83M493N189M	0.207027	44.8818	27.8	0.109861	38.8778	NA
372cb5d0-da4c-4972-b37c-c4949c171dd1.K562.5EU.60.labeled.III;16_chr1:37566000	chr1	+	37566824	37595932	29109	184M1D1M664N88M513N3I83M493N454M5D3M5035N111M1D4M207N151M771N105M728N125M5662N1M1I1M2D3M3D110M435N2D2M2D2M2D155M928N2M2D69M3377N185M3210N141M1D1865N89M1D952N4M2D86M1912N174M	1.4092	56.2183	62.53	0.966746	36.0111	83.89
5f73257e-5a78-4d42-b405-4a261480b4d0.K562.5EU.60.labeled.IV;16_chr1:37681000	chr1	+	37681574	37690506	8933	1584M158N118M2834N1M1D3M4I180M3038N395M1D3M331N286M	0.0182322	271.042	125.26	0.0182322	271.042	123.69
298a054d-7147-41a9-afc1-edbef457abcc.K562.5EU.60.labeled.IV;16_chr1:37681000	chr1	+	37681574	37690506	8933	1584M158N118M2834N1M1D183M3155N2I281M3I1M118N499M	0.0748564	200.421	163.455	0.0392551	135.208	NA
41cf99e1-c14f-41bb-a8d9-430d2398073a.K562.5EU.60.labeled.IV;16_chr1:37681000	chr1	+	37681574	37690506	8933	1584M158N118M2834N1M1D183M3155N2I284M329N286M	0.0828639	98.2946	28.9625	0.0202733	110.437	171
33799383-87fc-4750-abbb-6291f42bf9f5.K562.5EU.0.unlabeled.III;16_chr1:37681000-1	chr1	+	37681574	37686666	5093	1584M158N3351M	0.0176675	467.806	NA	0.0425688	86.2938	77.57
d6d2a4d7-f624-479d-82fa-993149bbfede.K562.5EU.60.labeled.II;16_chr1:37681000-1	chr1	+	37681574	37690552	8979	1584M158N118M2834N1M1D3M4I180M3155N2I278M1D3M331N332M	0.0371906	214.086	45.2325	NA	NA	67.145
NM_001256875_018101-2	chr1	+	37692508	37709714	17207	277M120N129M2876N41M2954N73M1458N86M1232N65M1433N96M2093N127M1410N87M1257N1393M	0.813015	67.8478	110.465	0.608198	53.1793	123.65
NM_018101_018101-1	chr1	+	37692508	37709714	17207	71M97N109M120N129M2876N41M2954N73M1458N86M1232N65M1433N96M2093N127M1410N87M1257N1393M	0.693097	56.1081	86.89	0.392783	62.6087	82.89
7dbb898d-1a98-4178-b79a-88c5a012d9fa.K562.5EU.60.labeled.heat.IV;0_chr1:37705000	chr1	+	37705736	37708055	2320	2320M	NA	NA	NA	NA	NA	NA
c905a081-43ba-4c2e-af07-63724d1207b4.K562.5EU.0.unlabeled.III;16_chr1:37802000-1	chr1	+	37802944	37808197	5254	1057M304N139M2412N123M124N109M576N410M	0.546324	187.893	116.793	0.320715	185.404	111.57
c38dbeae-d5c3-4363-adc5-d26cd7009766.K562.5EU.60.labeled.VI;16_chr1:37802000	chr1	+	37802944	37808185	5242	1057M304N140M3D2M2653N109M576N398M	0.0348725	669.808	53.545	0.134125	70.4707	49.25
3024d451-9e35-4827-bbbd-991b88ac6bda.K562.5EU.1440.labeled.II;16_chr1:37802000	chr1	+	37802965	37808197	5233	1036M304N252M2300N355M576N410M	0.0383576	160.698	35.2175	NA	NA	53.86
8391e7e0-90d6-4022-8a27-db3fadc69d51.K562.5EU.1440.labeled.II;16_chr1:37802000	chr1	+	37802973	37808138	5166	1028M304N2674M124N109M576N351M	0.0176675	467.806	52.7175	NA	NA	NA
8620f6f2-2e64-4eff-8c11-8068b397c21f.K562.5EU.0.unlabeled.II;16_chr1:37803000	chr1	+	37803086	37808185	5100	3893M124N109M576N398M	0.12334	102.325	42.5275	0.0176675	467.806	128.885
NM_001142726_001142726-2	chr1	+	37807810	37809448	1639	497M224N202M245N471M	2.95064	26.3128	79.045	3.01777	22.6299	89.25
NM_198446_198446-1	chr1	+	37808309	37809852	1544	131M91N202M245N875M	1.20477	37.182	11.615	1.34624	27.2809	66.03
f859373d-5ade-4f31-81bf-1c79d3a71d4c.K562.5EU.60.labeled.heat.I;16_chr1:37809000	chr1	+	37809577	37812753	3177	3177M	0.0383576	160.698	33.865	0.0608198	110.437	141.64
002fff2b-3a05-4720-8a25-4a985d7a2388.K562.5EU.60.labeled.I;16_chr1:37814000	chr1	+	37814814	37859581	44768	752M1852N65M4638N596M993N101M8424N2M8D80M2756N138M455N61M2880N1I1M2D2M1I136M1163N236M17092N463M1821N51M	0.0405465	110.437	11.9375	NA	NA	NA
65666fa7-131e-4f8a-a2b1-a3e30fcaf671.K562.5EU.60.labeled.V;16_chr1:37957000-2	chr1	+	37956983	37989980	32998	1285M9D1M1847N51M7870N2I89M1221N2I109M106N161M7144N3D3M1D65M1764N1D5M1D108M160N68M409N70M1052N135M1004N92M2357N87M446N73M4768N48M274N111M	0.180197	68.5032	118.802	0.158129	128.951	76.64
3590a5dd-57f2-46c9-838c-b5c5069367bd.K562.5EU.60.labeled.IV;16_chr1:37956000	chr1	+	37956983	37980842	23860	1285M9D1M1847N51M7870N2I89M1221N2I109M106N167M2D5M9727N62M1052N257M	0.170275	86.2938	108.16	0.0967042	150.411	66.11
fe6521ce-e208-440a-9927-07f53d8580d4.K562.5EU.60.labeled.heat.I;16_chr1:37956000	chr1	+	37956983	37990045	33063	1279M2D3M1858N51M7870N2I89M1221N2I109M106N161M7144N3D3M1D65M1764N1D5M1D108M160N68M409N70M1052N135M1004N92M2357N87M446N73M2793N101M105N58M1711N48M274N176M	0.601578	48.8431	99.27	0.306861	76.1027	96.92
e0b45173-12ea-4512-a9da-5b4d56b2ad23.K562.5EU.60.labeled.heat.V;16_chr1:37956000	chr1	+	37956983	37990010	33028	1278M1852N63M7870N2I89M1221N2I109M106N161M7144N3D3M1D65M1764N1D5M1D108M160N68M409N70M1052N135M1004N92M2357N87M446N73M2793N101M105N58M1711N48M274N141M	0.138629	62.6087	38.885	0.200662	35.392	NA
4e103601-107e-4d03-8196-c5fcff20641a.K562.5EU.0.unlabeled.II;16_chr1:37956000	chr1	+	37956983	37990010	33028	1285M9D1M1847N51M7870N2I1419M106N161M7144N3D3M1D65M1764N1D5M1D108M160N68M409N70M1052N135M1004N92M2357N87M446N73M2793N101M105N58M1711N48M274N141M	0.547832	49.7405	113.388	0.501651	42.6806	73.695
45dad828-27bf-4f37-be00-8bebf94173dc.K562.5EU.0.unlabeled.III;16_chr1:37956000-2	chr1	+	37956985	37990010	33026	1283M9D1M1847N51M7870N2I89M1221N2I109M106N161M7144N3D3M1D65M1764N1D5M1D108M160N68M409N70M1052N135M1004N92M2357N87M446N73M2793N101M105N58M1711N48M274N141M	0.451034	82.888	108.045	0.471598	50.1936	102.86
45dad828-27bf-4f37-be00-8bebf94173dc.K562.5EU.0.unlabeled.III;16_chr1:37956000-3	chr1	+	37956985	37989980	32996	1283M9D1M1847N51M7870N2I89M1221N2I109M106N161M7144N3D3M1D65M1764N1D5M1D108M160N68M409N70M1052N135M1004N92M2357N87M446N73M2793N101M105N58M1711N48M274N111M	0.165728	98.2946	118.765	0.37092	42.3201	61.025
0eaa032c-501e-4084-8d66-5dd742909dbd.K562.5EU.60.labeled.V;16_chr1:37957000	chr1	+	37956999	37987679	30681	1269M9D1M1847N51M7870N2I89M1221N2I109M106N161M7144N3D3M1D65M1764N1D5M1D106M631N1M5D1M1D70M1052N135M1004N92M2357N87M446N73M2793N107M	0.0371906	214.086	84.405	0.0405465	110.437	24.04
65666fa7-131e-4f8a-a2b1-a3e30fcaf671.K562.5EU.60.labeled.V;16_chr1:37957000	chr1	+	37957963	37990010	32048	305M9D1M1847N51M7870N2I89M1221N2I109M106N161M7144N3D3M1D65M1764N1D5M1D108M160N68M409N70M1052N135M1004N92M2357N87M446N73M4768N48M274N141M	0.0594458	126.875	72.1075	0.0693147	62.6087	69.48
a910a1d9-a015-4d3f-8db2-db1ec3e7b613.K562.5EU.1440.labeled.II;16_chr1:37958000	chr1	+	37957997	37990010	32014	271M9D1M1847N51M7870N2I89M1221N2I109M106N167M2D5M9727N62M1052N135M1004N87M8058N141M	NA	NA	NA	NA	NA	NA
9b335a7d-0324-4439-8268-e82cdbc865bd.K562.5EU.0.unlabeled.I;16_chr1:37996000	chr1	+	37996772	38005502	8731	787M124N190M92N170M842N1I174M6208N144M	0.190535	56.7178	32.6	0.115525	62.6087	49.1
3d12f872-aa28-430c-a0b9-acc0b1a3b0ac.K562.5EU.0.unlabeled.I;16_chr1:37996000	chr1	+	37996772	38005502	8731	787M124N190M92N170M842N1I173M1D107N177M5924N144M	0.542423	58.511	121.907	1.05658	30.1393	83.27
82b9ee6c-90e7-4a3a-a0b0-5393becac3ff.K562.5EU.60.labeled.heat.I;16_chr1:37996000	chr1	+	37996772	38005499	8728	1363M842N1I173M1D107N177M5924N141M	0.358052	56.3249	72.2725	0.565534	36.4434	110.08
71180eaf-97bb-4bd2-aa6e-9aeb9d5dd869.K562.5EU.0.unlabeled.I;16_chr1:37996000-1	chr1	+	37996772	38005532	8761	787M124N190M92N170M842N1I173M1D107N177M6006N92M	0.231049	62.6087	64.2425	0.401324	35.392	101.575
8ea5d28b-3cc2-4426-a088-1a099d53dd3a.K562.5EU.60.labeled.IV;16_chr1:37996000	chr1	+	37996772	38005502	8731	787M124N190M1104N1I174M6208N144M	0.0851376	86.2938	22.85	0.0191788	160.698	-1
NM_016037_016037	chr1	+	38012728	38023801	11074	138M3493N62M1247N103M693N114M481N94M100N131M3315N111M735N257M	0.358052	56.3249	61.195	0.369678	62.6087	133.66
b842e8f4-4511-4109-8dde-6c3403bf1c09.K562.5EU.60.labeled.V;0_NM_016037	chr1	+	38012728	38023801	11074	138M3493N62M1247N103M693N114M481N94M100N3557M735N257M	0.655466	48.0831	109.455	0.283992	77.1445	105.57
85733948-d3ff-4b48-aafd-7704b6aa4a6d.K562.5EU.60.labeled.heat.III;0_NM_016037	chr1	+	38012728	38023801	11074	138M3493N1412M693N114M481N94M100N131M3315N111M735N257M	0.606007	60.7963	112.332	0.410995	65.2274	88.79
494b87c2-18ad-477c-a4c8-71237834c496.K562.5EU.1440.labeled.II;0_NM_016037	chr1	+	38012742	38023774	11033	124M3493N1412M693N114M481N325M3315N1076M	0.261554	43.6881	56.875	0.144551	54.7527	42.76
6f90fb7f-1e75-49bf-afdf-c2d10d7a4dcb.K562.5EU.60.labeled.IV;0_NM_016037	chr1	+	38012794	38023762	10969	72M3493N62M1247N103M693N114M481N94M100N131M745N116M2454N111M735N218M	NA	NA	-0.5	NA	NA	NA
fc5be83d-faee-4f93-8039-4470362d8f96.K562.5EU.60.labeled.II;0_NM_016037	chr1	+	38014301	38024824	10524	21M2037N62M1247N103M693N114M481N94M100N131M3315N111M735N1280M	0.490856	85.2563	68.4775	0.311242	97.4903	133.395
512e5389-aa8a-4d04-95f4-f00543b27f28.K562.5EU.60.labeled.IV;0_NM_016037-3	chr1	+	38016342	38024795	8454	79M1247N103M693N114M481N94M100N131M3315N111M735N1251M	0.163854	104.347	81.465	0.170275	86.2938	79.8
e7ffddc6-0dfd-4e40-a038-90a9cf168ab0.K562.5EU.60.labeled.IV;16_chr1:38838000-1	chr1	+	38838201	38859746	21546	1502M6234N149M5527N145M616N115M3219N202M971N204M2327N335M	0.230513	92.8233	61.805	0.190301	88.9495	135.04
aac3d2e7-f679-4b6b-9c91-f82cfd5889ab.K562.5EU.0.unlabeled.II;16_chr1:38862000	chr1	+	38862516	38873336	10821	2199M2165N121M6242N2I94M	0.229073	46.8654	87.4525	0.0361951	300.991	114.65
57d7ffe5-9a7d-4a49-9344-533866b74cd7.K562.5EU.60.labeled.IV;16_chr1:38862000	chr1	+	38863503	38873336	9834	1212M2165N122M6269N2M3I2M1I2M1I8M4I4M1I48M	0.0425688	86.2938	45.185	0.0425688	86.2938	NA
00ef8eeb-6762-4977-8084-ac754ca00a9e.K562.5EU.60.labeled.VI;16_chr1:38860000-3	chr1	+	38863503	38873359	9857	1212M2165N130M552N47M5403N3D2M1D72M200N70M	1.21143	74.6264	109.075	0.862394	81.5283	114.595
fc9a9d95-83d4-4e3e-a51f-7a6b49967fe3.K562.5EU.60.labeled.IV;16_chr1:38863000-2	chr1	+	38863503	38873336	9834	1212M2165N114M6018N1M1D3M1I73M200N47M	0.0785102	135.208	52.25	0.0405465	110.437	88.5
d48ee829-95f2-49ab-a9c4-e91a4db6eef8.K562.5EU.60.labeled.IV;16_chr1:38863000	chr1	+	38863503	38873336	9834	1212M2165N130M6002N6D72M200N47M	0.0405465	110.437	70.57	0.0652885	78.3609	59.21
57d7ffe5-9a7d-4a49-9344-533866b74cd7.K562.5EU.60.labeled.IV;16_chr1:38862000-1	chr1	+	38864505	38873359	8855	210M2165N122M6269N2M3I2M1I2M1I8M4I4M1I71M	NA	NA	NA	NA	NA	NA
NM_024595_024595-3	chr1	+	38991280	39005887	14608	321M6570N141M2660N135M2240N72M626N1843M	0.603926	142.531	96.85	0.488163	108.403	166.37
NM_001136275_024595	chr1	+	38991301	39005887	14587	300M6570N141M5035N72M626N1843M	0.397115	125.218	97.825	0.154221	154.254	144.2
4214400e-29e3-4663-a001-da582e7967b3.K562.5EU.1440.labeled.II;0_chr1:39026000	chr1	+	39026330	39034605	8276	69M7993N214M	0.0231049	62.6087	NA	NA	NA	-1
NM_001184979_004552-2	chr1	+	39026330	39034605	8276	69M2324N218M5451N214M	6.98568	28.0199	65.88	6.17123	21.0833	96.435
NM_004552_004552-2	chr1	+	39026330	39034574	8245	73M2320N218M5451N183M	0.439614	17.5553	39.335	NA	NA	62.085
NM_004552_004552-3	chr1	+	39026330	39034605	8276	73M2320N218M5451N214M	8.08104	25.5783	74.6225	8.62273	17.6577	90.23
975dfc75-bbe0-4493-b2d2-eccfe7f5cef1.K562.5EU.1440.labeled.II;0_chr1:39026000	chr1	+	39026361	39034605	8245	42M7989N214M	NA	NA	NA	NA	NA	NA
NM_001184979_004552	chr1	+	39026361	39034605	8245	38M2324N218M5451N214M	3.33411	27.9753	69.28	2.14592	26.3128	72.645
NM_004552_004552	chr1	+	39026361	39034605	8245	42M2320N218M5451N214M	5.01693	23.5914	69.12	3.39479	24.5032	94.65
2589f85d-bfa4-4615-8782-9a4b5811072b.K562.5EU.60.labeled.heat.I;0_chr1:39204000	chr1	+	39204765	39206966	2202	2202M	NA	NA	NA	NA	NA	NA
5ba95e66-8f0b-4207-a150-e5fe08dc6ef3.K562.5EU.60.labeled.heat.IV;0_NM_012090	chr1	+	39379336	39486984	107649	109M799N130M1579N200M3281N496M1257N1472M33715N162M194N171M1127N167M3260N160M346N327M954N85M500N242M633N207M1626N120M393N108M1258N219M925N204M2015N232M1265N227M1502N123M98N102M626N102M93N174M91N156M146N198M534N129M1087N174M2596N156M104N207M134N120M441N170M2288N160M944N195M333N129M894N144M1058N189M3272N121M595N164M1382N163M1088N155M1574N75M4928N118M11065N212M4591N130M807N1447M	0.209525	170.159	163.347	0.135047	153.338	204
9be660d8-9b54-4ca3-9e7f-80201f333d33.K562.5EU.60.labeled.heat.III;0_NM_012090	chr1	+	39387529	39486225	98697	1130M33715N162M194N171M1127N167M3260N160M346N327M954N85M500N242M633N207M1626N111M402N108M1258N219M925N204M2015N232M1265N227M1502N123M98N102M626N102M93N174M91N156M146N198M534N129M1087N174M2596N156M104N207M134N120M441N170M2288N160M944N195M333N129M894N144M1058N189M3272N121M595N164M1382N163M1088N155M1574N75M4928N118M11065N212M910N111M3570N130M807N688M	0.130577	78.3609	59.5125	NA	NA	NA
8524b84d-6251-49b0-89e2-221489e0453f.K562.5EU.60.labeled.VI;0_NM_012090	chr1	+	39466998	39486984	19987	1735M11065N212M4591N2384M	0.218709	76.7798	130.48	0.0608198	110.437	175.49
847a26dd-3e9b-4f10-92b9-c79a804d5ec1.K562.5EU.60.labeled.heat.V;16_chr1:39522000	chr1	+	39522284	39523022	739	739M	NA	NA	NA	NA	NA	NA
3ae74ca5-f964-435b-9d27-91368477edd2.K562.5EU.0.unlabeled.II;16_chr1:39552000	chr1	+	39552067	39553006	940	940M	NA	NA	NA	NA	NA	NA
3dd112d2-d125-455b-9f6c-2192e62aa4eb.K562.5EU.60.labeled.heat.V;16_chr1:39560000-1	chr1	+	39560820	39576839	16020	303M2D560N99M284N1M1D137M1D1M118N93M2I1M1199N124M1I3M95N80M500N123M1D157N73M332N267M2368N1M4D98M955N138M655N91M173N145M1231N118M1043N193M1D3171N1080M	0.607467	31.4818	105.87	0.0693147	62.6087	NA
7f8ccd39-fcc5-4c96-bd18-3bfb31d17d6c.K562.5EU.60.labeled.II;16_chr1:39560000	chr1	+	39560820	39576232	15413	305M605N54M284N1M1D137M1D1M118N93M2I1M1199N124M1I3M95N82M550N2I71M1D142N88M332N267M2368N1M4D98M955N138M655N91M173N145M1231N118M1043N193M1D3171N473M	0.0202733	110.437	NA	NA	NA	NA
6202f085-2164-46ec-996c-e0d653f82fa4.K562.5EU.60.labeled.V;16_chr1:39560000-1	chr1	+	39560820	39576839	16020	303M2D560N99M284N1M1D137M1D1M118N93M2I1M1199N121M681N123M1D142N88M332N267M2368N1M4D98M955N138M655N91M173N145M1231N118M1043N193M1D3171N1080M	0.395406	50.8162	76.935	0.58038	25.5248	163.19
9fb5f642-1db8-4e18-a4d8-f7b9285f48fd.K562.5EU.60.labeled.heat.IV;16_chr1:39560000	chr1	+	39560820	39576780	15961	1387M1D1M118N93M2I1M1199N123M2D2M727N71M1D142N88M332N267M2368N1M4D98M955N138M655N91M173N145M1231N118M1043N193M1D3171N1021M	0.200662	35.392	NA	0.0462098	62.6087	175.73
0469a9b4-3da5-4fd0-b561-22780fdee869.K562.5EU.0.unlabeled.I;16_chr1:39560000	chr1	+	39560820	39576751	15932	303M2D560N99M284N1M1D137M1D1M118N93M2I1M1199N121M91N92M550N2I71M1D142N88M332N267M2368N1M4D98M955N138M655N91M173N145M1231N118M1043N193M1D3171N992M	0.0462098	62.6087	67.555	0.152715	46.8654	73.305
814e0f79-867b-48ea-9285-9de12d8f3952.K562.5EU.60.labeled.heat.III;16_chr1:39560000	chr1	+	39560820	39576430	15611	303M2D560N99M284N1M1D137M1D1M118N93M2I1M1199N121M91N90M500N123M1D142N88M332N267M2368N1M4D98M955N138M655N91M173N145M1231N118M1043N193M1D3171N671M	0.0693147	62.6087	120	0.130777	43.6881	-1
3b1c5c3f-166d-449c-aa77-0716476b6649.K562.5EU.60.labeled.V;16_chr1:39560000	chr1	+	39560820	39576780	15961	303M2D560N99M284N1M1D137M1D1M118N1417M1I3M95N82M550N2I72M563N266M2368N1M4D98M955N138M655N91M173N145M1231N118M1043N193M1D3171N1021M	0.0988514	50.8162	NA	0.0231049	62.6087	32.55
027b2089-dd13-4ef7-96d1-6ac1a3337fe6.K562.5EU.0.unlabeled.I;16_chr1:39560000	chr1	+	39560820	39565253	4434	303M2D560N99M284N1M1D2476M563N145M	0.454046	21.6944	217.225	0.130777	43.6881	110.67
e69cf678-5405-4a87-b322-ce14ebcea4f7.K562.5EU.60.labeled.heat.III;16_chr1:39560000	chr1	+	39560820	39576780	15961	303M2D560N99M284N1M1D137M1D1M118N93M2I1M1199N124M1I3M95N80M500N123M1D142N88M332N267M2368N1M4D1191M655N91M173N145M1231N118M1043N193M1D3171N1021M	0.899046	32.3197	119.465	0.711374	35.9534	111.14
f0f32810-472b-4eed-bd79-2ef66d4a7724.K562.5EU.60.labeled.heat.IV;16_chr1:39560000	chr1	+	39560820	39576780	15961	303M2D560N99M284N1M1D137M1D1M118N93M2I1M1199N123M2D2M727N71M1D142N88M332N267M2368N1M4D98M955N138M655N91M173N145M1231N118M1043N193M1D3171N1021M	0.109861	38.8778	48.39	0.179176	23.5914	NA
117729fa-b817-41c3-8ab5-fcd68aecc7fc.K562.5EU.60.labeled.heat.III;16_chr1:39560000	chr1	+	39560820	39576780	15961	303M2D560N99M284N1M1D137M1D1M118N93M2I1M1199N302M500N123M1D142N88M332N267M2368N1M4D98M955N138M655N91M173N145M1231N118M1043N193M1D3171N1021M	0.714098	38.8778	136.225	0.493412	27.1953	79.305
14ef9c03-4b68-478c-ae51-0041e60c6d45.K562.5EU.0.unlabeled.II;16_chr1:39560000	chr1	+	39560820	39576780	15961	303M2D560N99M284N1M1D137M1D1M118N93M2I1M1199N124M1I3M95N80M500N123M1D142N88M332N267M2368N1M4D98M955N138M655N91M173N145M1231N118M1043N193M1D3171N464M328N229M	0.167524	55.8758	18.2675	0.261554	43.6881	65.38
ab4aed6c-c936-4350-b0ac-6acd24c91c53.K562.5EU.60.labeled.IV;16_chr1:39560000	chr1	+	39560820	39576780	15961	303M2D560N99M284N1M1D137M1D1M118N93M2I1M1199N124M1I3M95N82M550N2I71M1D142N88M332N267M2368N1M4D98M955N138M655N94M169N146M1231N118M1043N193M1D3171N1021M	0.42275	31.8415	107.498	0.292311	33.9811	88.87
bab1097a-200d-4a58-a219-c301a59c36d6.K562.5EU.0.unlabeled.I;16_chr1:39560000	chr1	+	39560820	39576780	15961	303M2D560N99M284N1M1D137M1D1M118N93M2I1M1199N124M1I3M95N82M550N2I71M1D142N88M332N267M2368N1M4D98M955N138M655N91M173N145M1231N118M1043N193M1D3171N464M328N229M	0.243279	53.1793	61.0125	0.203254	67.8478	122.46
9fc3f4a4-5406-4863-ace7-3e554f2e27f9.K562.5EU.0.unlabeled.II;16_chr1:39560000	chr1	+	39560835	39567495	6661	1585M2I1M1199N121M681N123M1D142N88M332N2388M	0.0652885	78.3609	NA	0.0202733	110.437	NA
814e0f79-867b-48ea-9285-9de12d8f3952.K562.5EU.60.labeled.heat.III;16_chr1:39560000-1	chr1	+	39560835	39576751	15917	288M2D560N99M284N1M1D137M1D1M118N93M2I1M1199N121M91N90M500N123M1D142N88M332N267M2368N1M4D98M955N138M655N91M173N145M1231N118M1043N193M1D3171N992M	NA	NA	NA	0.0231049	62.6087	NA
NM_006112_001319293-1	chr1	+	39738865	39753693	14829	67M1233N99M1102N44M485N27M1294N82M526N101M1450N124M3404N186M3821N143M234N407M	0.849631	24.054	57.705	0.932406	14.2645	136.12
NM_006112_001319293	chr1	+	39738894	39753715	14822	38M1233N99M1102N44M485N27M1294N82M526N101M1450N124M3404N186M3821N143M234N429M	1.34624	27.2809	118.84	0.577733	43.2533	107.23
220924b8-2654-416d-a3e4-7c61e3cbb519.K562.5EU.60.labeled.VI;0_NM_001319293	chr1	+	39738894	39753693	14800	38M1233N99M1102N44M485N27M1294N82M526N101M1489N85M3404N186M3821N143M234N407M	0.225612	28.1921	47.52	0.13412	26.3128	68.755
NR_036543_001319293-1	chr1	+	39738894	39753987	15094	30M1241N99M1102N44M485N27M1294N82M526N101M1450N124M3404N186M3821N143M234N701M	0.638994	34.4312	62.8525	0.310174	36.6657	113.185
NM_203456_001319293	chr1	+	39738894	39763908	25015	38M1233N99M1102N44M485N27M1294N82M526N101M1450N124M3404N186M3821N143M10636N220M	NA	NA	NA	NA	NA	NA
2f9073bd-46a1-4fe7-a39f-d65fad3b7f40.K562.5EU.0.unlabeled.III;0_NM_001319293	chr1	+	39740164	39753693	13530	100M1102N44M485N1403M526N101M1450N124M3404N186M3821N143M234N407M	NA	NA	57.945	0.277259	20.2817	85.47
1c72d6e8-1c3d-4ac2-b9ad-c90240198f81.K562.5EU.60.labeled.IV;0_NM_001319293	chr1	+	39740164	39763908	23745	100M1102N44M485N27M1294N82M526N101M4978N186M3821N10999M	0.197703	50.8162	33.94	0.238202	32.7368	198.69
c10176b2-7ef4-40ff-b296-28b33d0da674.K562.5EU.60.labeled.VI;16_chr1:39760000	chr1	+	39760176	39788835	28660	396M2523N111M509N77M831N190M23334N689M	NA	NA	NA	NA	NA	NA
715fc741-2825-44c7-bf8e-c70c95d239c1.K562.5EU.60.labeled.heat.I;16_chr1:39769000	chr1	+	39769528	39772218	2691	2691M	NA	NA	NA	0.0549306	38.8778	129.54
71d324d1-5f91-4da9-813b-4256ca411e6c.K562.5EU.60.labeled.IV;16_chr1:39772000	chr1	+	39772855	39788835	15981	1604M392N188M13113N684M	NA	NA	NA	NA	NA	NA
b26b61bb-d2ba-4936-9a64-dd2a2602faa5.K562.5EU.60.labeled.VI;0_chr1:39802000	chr1	+	39802697	39809436	6740	2336M2969N197M863N375M	NA	NA	NA	0.0231049	62.6087	NA
551b350a-f5f3-4d88-8890-489c45f71959.K562.5EU.60.labeled.heat.III;16_chr1:39841000	chr1	+	39841052	39883509	42458	862M2187N117M312N108M2576N2D2M1D77M250N2718M2D2467N144M1093N99M3211N3I136M25900N194M	0.293178	93.1352	112.34	0.261154	78.3609	186.97
643bb2e3-16be-46d7-9eb6-ed666e1f8504.K562.5EU.60.labeled.heat.III;16_chr1:39841000	chr1	+	39841052	39883509	42458	862M2187N117M312N108M2576N2D2M1D77M250N115M325N112M2021N145M2D3706N97M3211N3I136M25900N194M	0.0760081	173.734	33.355	0.0760081	173.734	149.68
f16f42ff-45b8-47d1-b316-ca5c0859e216.K562.5EU.0.unlabeled.I;16_chr1:39841000	chr1	+	39841052	39883496	42445	862M2187N117M312N108M2576N2D2M1D77M250N115M325N112M2021N145M2D2467N144M30441N179M	0.0594458	126.875	48.205	0.0652885	78.3609	79.63
93f508ec-ebe7-4539-a651-6afb7e9c83cc.K562.5EU.60.labeled.VI;16_chr1:39899000-1	chr1	+	39899620	39902014	2395	1819M363N4M1D208M	0.125334	94.2796	46.035	0.0796737	122.738	110.52
99d737ec-9c48-4cae-a82a-770997d1a268.K562.5EU.60.labeled.V;0_chr1:39962000	chr1	+	39962629	39963401	773	773M	NA	NA	NA	NA	NA	NA
738b92fc-31a3-45a5-ae61-ca357b0456fd.K562.5EU.60.labeled.IV;0_NM_001105530-1	chr1	+	40040519	40072636	32118	265M18550N125M608N104M1564N78M2414N144M103N86M1655N106M1219N178M1972N185M284N124M147N83M323N144M470N1187M	0.314304	69.3462	74.09	0.170275	86.2938	174
942d7ec7-142f-434e-b14a-5269c2357a32.K562.5EU.60.labeled.heat.I;0_NM_001105530-2	chr1	+	40040690	40072636	31947	94M18553N122M611N101M1564N78M2414N144M103N86M1655N106M1219N178M1972N185M284N124M147N83M323N144M470N1187M	0.178337	126.875	88.755	0.312063	55.3575	111
NM_001105530_001105530	chr1	+	40040690	40072636	31947	94M18553N122M608N104M1564N78M2414N144M103N86M1655N106M1219N178M1972N185M284N124M147N83M323N144M470N1187M	0.444337	60.1286	69.45	0.280868	80.7967	135.81
48946b4a-93e9-4685-b6ab-ba294b30e8f5.K562.5EU.60.labeled.heat.IV;0_NM_001105530-1	chr1	+	40040717	40072636	31920	85M18535N122M611N101M1564N78M2414N144M103N86M1655N106M1219N178M1972N185M284N124M147N83M323N144M470N1187M	0.369678	62.6087	132.83	0.277259	62.6087	91.59
4bd5b41a-1860-4ce2-9870-d6e9968d04a3.K562.5EU.60.labeled.heat.III;0_NM_001105530	chr1	+	40040747	40072636	31890	37M18550N125M608N104M1564N78M2414N144M103N86M1655N106M1219N178M1972N185M284N124M147N550M470N1187M	0.175094	49.1253	85.03	0.0575364	160.698	192.33
28ea4599-4c83-48ae-87ac-47bc46cff11f.K562.5EU.0.unlabeled.II;0_NM_001105530	chr1	+	40040747	40072636	31890	55M18532N125M611N101M1564N78M2414N144M103N86M1655N106M1219N178M1972N185M284N124M147N83M323N144M470N1187M	0.22632	67.3235	87.2125	0.176336	74.4112	116.95
e325fa9b-d0bb-41e8-8a81-298b537ee1e9.K562.5EU.1440.labeled.II;0_NM_001105530	chr1	+	40040747	40072636	31890	55M18532N125M2276N78M2414N144M103N86M1655N106M1219N178M1972N185M284N124M147N83M323N1801M	0.0175601	543.791	NA	0.0364643	271.042	125.03
NM_006367_001105530	chr1	+	40040747	40072636	31890	55M18535N122M608N104M1564N78M2414N144M103N86M1655N106M1219N178M1972N185M284N124M147N83M323N144M470N1187M	0.462098	62.6087	105.22	0.556768	47.5852	88.245
824d6c96-eca9-4381-8eec-4cb968600f37.K562.5EU.0.unlabeled.II;0_NM_001105530-1	chr1	+	40040747	40072636	31890	55M18532N125M608N104M1564N78M2414N144M103N86M1655N106M1219N178M1972N185M284N124M147N83M323N144M470N1187M	0.346574	62.6087	104.155	0.35967	45.7327	109.33
NM_006367_001105530-1	chr1	+	40040772	40072636	31865	30M18535N122M608N104M1564N78M2414N144M103N86M1655N106M1219N178M1972N185M284N124M147N83M323N144M470N1187M	0.265183	106.685	70.51	0.515098	31.63	51.435
0536446d-778f-4c02-bef6-884fdf388646.K562.5EU.60.labeled.IV;0_NM_001105530	chr1	+	40040772	40072636	31865	30M627N65M17840N125M608N104M1564N78M2414N144M103N86M1655N106M1219N178M1972N185M284N124M147N83M323N144M470N1187M	0.440895	52.1296	68.0475	0.5448	44.5978	97.905
7b7089b7-f8cb-4305-a612-362e73506f97.K562.5EU.0.unlabeled.I;0_NM_001105530-1	chr1	+	40040807	40072636	31830	687M17840N125M608N104M1564N78M2414N144M103N86M1655N106M1219N178M1972N185M284N124M147N83M323N144M470N1187M	0.190301	88.9495	135.525	0.138629	62.6087	110.47
56d3bcea-4108-4856-a03b-951abd91b856.K562.5EU.60.labeled.heat.I;0_NM_001105530	chr1	+	40064271	40072636	8366	100M103N86M1655N106M1219N2335M284N821M470N1187M	0.0775387	147.859	47.53	0.0828639	98.2946	97.7
7caf4c21-8ff4-4b9f-a4d2-a1be08f93d32.K562.5EU.60.labeled.heat.III;16_chr1:40072000	chr1	+	40072712	40097231	24520	1469M4371N1D2M4D99M1738N93M1D8921N104M3D1813N69M647N2I125M225N110M4607N118M	0.224075	204.951	120.855	0.359178	121.363	87.35
d6379abd-e346-42af-8684-ef26854abb75.K562.5EU.60.labeled.VI;16_chr1:40072000-1	chr1	+	40072712	40097261	24550	1469M2657N2M1D73M1646N98M1738N93M1D8921N104M3D1813N69M647N2I125M225N110M4607N148M	2.74671	45.8281	109.392	1.54803	62.6087	109.57
d8c94e31-104b-446f-82b6-3e0f9c034393.K562.5EU.60.labeled.V;16_chr1:40084000	chr1	+	40084753	40085902	1150	1150M	0.0549306	38.8778	NA	NA	NA	NA
NM_012421_012421-1	chr1	+	40161389	40240916	79528	248M27418N155M1562N82M4778N133M6647N203M19959N137M8806N142M4133N5125M	0.133522	168.122	96.6575	0.0967042	150.411	177.82
0cced4c8-993d-48fe-892b-8bb8937b14af.K562.5EU.60.labeled.heat.V;16_chr1:40256000	chr1	+	40256426	40257908	1483	1483M	0.201223	115.338	117.43	0.0999183	120.264	174.91
NM_005857_005857-2	chr1	+	40258225	40294181	35957	170M2444N147M6800N87M546N117M1439N153M1766N142M9307N185M4397N105M4824N144M1447N1737M	0.290113	150.411	98.6575	0.270845	95.5133	88.585
c8a25f73-773b-4d1c-9a4f-239503a2c989.K562.5EU.60.labeled.heat.I;0_NM_005857	chr1	+	40258258	40294181	35924	137M955N183M4D1302N147M6800N87M546N117M1439N153M1766N142M9307N185M4397N105M4824N144M1447N1737M	0.198557	125.218	106.58	0.0760081	173.734	95.55
dbe5533c-2a2c-4e0a-8793-49f863cb56df.K562.5EU.60.labeled.heat.V;0_NM_005857	chr1	+	40271951	40294181	22231	85M8084N193M1030N185M4397N105M4824N144M1447N1737M	0.120172	118.619	29.635	0.0361951	300.991	148.19
03b35ba1-8f84-4095-beea-20cd3a2fe597.K562.5EU.0.unlabeled.I;0_NM_022733	chr1	+	40373677	40423319	49643	547M32512N134M1783N86M1018N83M3176N87M1056N88M1025N110M794N166M438N317M4879N1344M	0.314304	69.3462	-0.5	0.676539	33.5494	118.23
5ef39372-afd9-458b-891d-9174866625f6.K562.5EU.0.unlabeled.II;0_NM_022733	chr1	+	40373730	40423319	49590	494M38792N87M1056N82M1031N110M794N166M438N317M4879N1344M	0.381788	46.8654	141.5	0.266169	54.0377	135.4
NM_022733_022733-3	chr1	+	40373730	40423319	49590	494M32512N134M1783N86M1018N79M3180N87M1056N82M1031N110M794N166M438N317M4879N1344M	1.29003	40.8901	122.38	1.22948	32.2789	157.27
a2093f27-26af-416c-b2d6-34e7d7bea95e.K562.5EU.60.labeled.heat.IV;0_NM_022733	chr1	+	40373774	40423319	49546	450M29460N63M2989N134M1783N86M1018N79M3180N87M1056N82M1031N110M794N166M438N317M4879N1344M	0.351982	59.4672	67.4125	0.554518	30.6383	182.09
7f531f20-fcd9-4054-b6b6-5c43a0ed1efb.K562.5EU.0.unlabeled.I;0_chr1:40421000	chr1	+	40422960	40423320	361	361M	0.0462098	62.6087	NA	0.0462098	62.6087	NA
NM_152373_152373	chr1	+	40531675	40548162	16488	113M1355N39M7404N127M902N96M4851N1601M	0.229073	46.8654	5.48	0.0182322	271.042	236.81
ba7b83a1-6689-4864-818f-6b784f15955c.K562.5EU.0.unlabeled.II;16_chr1:40620000	chr1	+	40620684	40621068	385	385M	0.0185953	214.086	108.345	0.0202733	110.437	139.56
eeacf6b5-773c-4799-ba29-3d9f623880c2.K562.5EU.60.labeled.heat.III;16_chr1:40658000	chr1	+	40658044	40659067	1024	1024M	NA	NA	96	NA	NA	NA
1d2da1fb-00f3-4472-890f-1e964a13d8b3.K562.5EU.60.labeled.heat.II;16_chr1:40685000	chr1	+	40685425	40686010	586	586M	0.0185953	214.086	98.15	0.0185953	214.086	NA
e014a5ee-900d-4383-bb26-a1337e302769.K562.5EU.0.unlabeled.II;16_NR_024567	chr1	+	40689084	40692043	2960	2960M	0.103094	100.711	269.04	0.0549306	38.8778	NA
933828f5-53af-4715-83b4-83bb12ba6724.K562.5EU.60.labeled.I;0_NM_001142587-2	chr1	+	40691629	40771604	79976	239M46968N113M8585N72M1967N114M3464N96M4874N174M4593N159M3549N108M2652N60M981N1208M	0.494376	38.8778	147.012	0.274653	38.8778	154.5
0ae4d3d7-5cef-4a7e-b2d4-89c0ace16ff1.K562.5EU.60.labeled.V;0_NM_001142587	chr1	+	40691642	40771099	79458	226M46968N110M8588N72M1967N114M3464N96M4874N174M4593N159M3549N108M2652N60M1293N391M	NA	NA	NA	NA	NA	NA
dceb8983-c3c5-45c6-ac12-63c296937a5a.K562.5EU.0.unlabeled.II;0_NM_001142587	chr1	+	40691715	40771604	79890	153M46968N113M8585N72M1967N114M3464N96M4877N171M4593N159M3549N108M2652N60M1293N896M	0.369678	30.6383	114.51	0.359437	27.5138	183.105
NM_014223_001142587-2	chr1	+	40691715	40771604	79890	153M46968N113M8585N72M1967N114M3464N96M4874N174M4593N159M3549N108M2652N60M1293N896M	0.42275	31.8415	105.79	0.292311	33.9811	127.45
84314261-50b0-46b4-9976-5a08c373aa64.K562.5EU.60.labeled.heat.III;0_NM_014223-2	chr1	+	40762098	40771604	9507	7318M1293N896M	0.167524	55.8758	NA	NA	NA	NA
98358d7f-b49e-4820-8999-d35f478ff96a.K562.5EU.60.labeled.IV;0_NM_172163	chr1	+	40820233	40840451	20219	28M2053N89M8681N221M1709N100M1853N132M2566N130M516N2141M	NA	NA	NA	0.0924196	30.6383	NA
0105d269-fd20-409e-81bf-f9f2983ab2d6.K562.5EU.60.labeled.heat.IV;16_NM_133467	chr1	+	40861064	40862352	1289	1289M	0.312063	55.3575	101.475	0.184839	62.6087	100.045
1b8e695b-0f42-4abd-ae66-640949e40e36.K562.5EU.60.labeled.IV;0_NM_001301237	chr1	+	40979659	41012562	32904	171M3448N179M1364N171M2380N101M1121N117M2454N84M516N81M4071N152M1325N133M3502N89M1042N95M859N63M2874N44M1354N97M1113N56M79N97M554N145M2068N905M	0.111125	72.0459	170.435	0.0693147	62.6087	109.8
NM_001905_001301237-1	chr1	+	40979686	41012562	32877	144M3448N179M1364N171M2380N101M1121N117M2454N84M516N81M4071N152M1325N133M3502N89M1042N95M859N63M2874N44M1354N97M1113N56M79N97M554N145M571N94M1403N905M	1.60297	67.9216	113.9	1.22402	37.7742	103.18
e214bb14-d9c0-4424-8637-d321f1b921dc.K562.5EU.0.unlabeled.II;16_chr1:41027000	chr1	+	41027203	41242187	214985	1114M260N3D2M1D143M5256N68M1D3312N185M3D1M8862N187M2091N199M21704N129M4497N231M37831N237M3397N3I3M1D89M25867N236M8501N73M8040N209M1I1M1I4M1408N7M2I6M2D69M24688N132M55808N127M	0.167851	92.2777	76.91	NA	NA	95.38
523b020d-baba-493a-b05d-824d49673e61.K562.5EU.60.labeled.IV;16_chr1:41027000	chr1	+	41027208	41041105	13898	1109M260N3D2M1D142M8632N1M3D3745M	0.0405465	110.437	102.93	NA	NA	317.19
3735cf4f-d26f-4558-80d2-a6a6991bc7da.K562.5EU.1440.labeled.II;16_chr1:41240000	chr1	+	41240676	41241492	817	817M	NA	NA	NA	NA	NA	NA
b5ae0209-e10e-45ec-b34e-b825eb66571d.K562.5EU.60.labeled.VI;0_chr1:41381000	chr1	+	41381494	41383589	2096	2096M	0.0549306	38.8778	NA	NA	NA	NA
151b4fde-9463-43fe-8797-5eaa1b89b89e.K562.5EU.60.labeled.IV;16_chr1:41847000	chr1	+	41847198	42035938	188741	1244M425N223M69323N114M117282N130M	0.0367896	242.092	46.42	NA	NA	NA
ce5a6bc3-ab50-4714-b420-7a9effe874f8.K562.5EU.60.labeled.I;16_chr1:42176000-2	chr1	+	42176535	42335220	158686	3290M2091N108M6712N191M374N105M1900N2I412M3170N172M4036N1D122M28649N8M3D89M2I5M37150N67M13158N326M4I5M32381N56M23948N157M	0.372137	76.501	125.745	0.48028	64.8532	163.305
92ea4195-8704-4510-9df8-8204d570948e.K562.5EU.60.labeled.heat.IV;0_NM_001287511	chr1	+	42456545	42473369	16825	84M618N104M15771N248M	NA	NA	NA	0.0425688	86.2938	NA
NM_001077447_001077447-1	chr1	+	42456545	42460401	3857	84M618N104M2252N799M	0.0185953	214.086	50.6225	NA	NA	80.54
NM_001077447_001077447	chr1	+	42456574	42460414	3841	55M618N104M2252N812M	0.0185953	214.086	72.155	NA	NA	NA
NM_024664_024664-1	chr1	+	42456574	42460414	3841	500M173N104M2252N812M	0.141913	110.437	87.5925	0.0359685	331.995	107
df5c15fd-3248-48ee-9120-4bdaf8d57e7f.K562.5EU.0.unlabeled.III;16_chr1:42499000	chr1	+	42499798	42499961	164	164M	NA	NA	NA	NA	NA	NA
35c6135e-8c66-4993-be63-64b7e7960485.K562.5EU.60.labeled.IV;0_NM_006347-2	chr1	+	42658360	42676734	18375	153M331N65M592N66M1295N43M3958N93M1024N88M479N41M763N90M9143N151M	NA	NA	NA	NA	NA	NA
NM_006347_006347-3	chr1	+	42658409	42676742	18334	104M331N65M319N24M270N45M1295N43M3958N93M1024N88M479N41M763N90M9143N159M	0.499497	79.0488	102.805	0.665057	46.2558	47.545
9fb4b409-415a-4795-abee-938d169943c3.K562.5EU.60.labeled.heat.III;0_NM_006347	chr1	+	42658435	42676742	18308	78M331N65M319N24M270N45M1295N43M3958N97M1020N88M479N41M763N90M9143N159M	0.0191788	160.698	NA	0.0185953	214.086	142.15
c40d6b6b-ff10-4981-b380-33c85379ecc8.K562.5EU.60.labeled.IV;0_NM_006347	chr1	+	42658435	42676742	18308	78M335N61M319N24M270N45M1295N43M3958N93M1024N88M479N41M763N90M9143N159M	0.0851376	86.2938	NA	0.115525	62.6087	31.03
ca796dae-1a0d-481a-a9d7-e67a5a8a3184.K562.5EU.60.labeled.IV;0_NM_006347	chr1	+	42658435	42676742	18308	78M331N65M613N45M1295N43M3958N93M1024N88M479N41M763N90M9143N159M	0.107799	81.5283	9.5475	0.0185953	214.086	NA
NM_006347_006347	chr1	+	42658435	42676742	18308	78M331N65M319N24M270N45M1295N43M3958N93M1024N88M479N41M763N90M9143N159M	0.624094	49.396	102.685	0.577733	43.2533	86.71
cdc2c97b-b1c2-49a5-9b62-6b551eec5637.K562.5EU.60.labeled.IV;0_NM_006347	chr1	+	42658435	42681607	23173	60M349N65M613N45M1295N43M2513N126M1319N93M1024N88M479N41M763N90M11285N144M2324N414M	0.0462098	62.6087	39.57	NA	NA	NA
6a5a0d43-e745-40e4-b8ee-02ef7ca0e9e3.K562.5EU.60.labeled.V;0_NM_006347	chr1	+	42658435	42676734	18300	78M331N65M319N24M270N45M1295N43M3962N89M1024N88M479N41M763N90M9143N151M	0.0231049	62.6087	NA	NA	NA	NA
4200e605-f9f9-492b-a98f-51bb11331d60.K562.5EU.0.unlabeled.I;0_NM_006347	chr1	+	42658435	42676742	18308	78M331N65M319N143M151N45M1295N43M3958N93M1024N88M479N41M763N90M9143N159M	0.502805	48.448	63.72	0.190535	56.7178	94.33
1c667eb3-2959-4ac5-ab4d-3c50ee539a8d.K562.5EU.60.labeled.IV;0_NM_006347	chr1	+	42658435	42676035	17601	78M331N65M319N24M270N45M1295N43M3958N93M1024N88M479N41M763N90M8292N303M	NA	NA	NA	NA	NA	NA
c8833df1-f47d-4694-b7d4-ee32c5324d68.K562.5EU.60.labeled.heat.V;0_NM_006347	chr1	+	42658435	42676742	18308	78M331N65M319N24M270N45M1295N43M3958N93M1024N88M479N41M763N90M7926N82M1135N159M	0.449003	49.5013	75.2475	0.35967	45.7327	107
661c9634-17ac-45ff-b05c-8006f2897413.K562.5EU.60.labeled.heat.I;0_NM_006347	chr1	+	42658435	42676742	18308	78M331N65M613N45M1295N43M2513N126M1319N93M1024N88M479N41M763N90M7407N1895M	0.107799	81.5283	63.715	0.0185953	214.086	267.165
9e656ed8-897c-4f26-ae4d-8ed60c007509.K562.5EU.1440.labeled.II;0_NM_006347	chr1	+	42658435	42676742	18308	78M331N65M319N24M270N45M1295N43M5075N88M479N41M763N90M9143N159M	0.0392551	135.208	133.02	NA	NA	NA
a10ad5b7-f5dd-4a06-8ba9-544a67b0b491.K562.5EU.60.labeled.IV;0_NM_006347	chr1	+	42658435	42676742	18308	78M331N65M613N45M1295N43M2513N126M1319N93M1024N88M479N41M763N90M9143N159M	0.0594458	126.875	33.3625	NA	NA	79.04
aeb40ebd-8646-4edf-a0bc-a8fd5c337f72.K562.5EU.0.unlabeled.III;0_chr1:42674000	chr1	+	42676606	42676759	154	154M	NA	NA	NA	NA	NA	NA
c5fe2bcb-fb11-4771-b3e9-28f8d07bad73.K562.5EU.60.labeled.IV;16_chr1:42680000	chr1	+	42681520	42682140	621	621M	NA	NA	NA	NA	NA	NA
8ee61774-a172-44f3-8f92-881a1f25737c.K562.5EU.0.unlabeled.I;0_NR_132737	chr1	+	42682439	42702357	19919	293M671N64M10023N34M2675N90M353N303M235N83M3549N235M934N377M	0.197703	50.8162	63.97	0.225612	28.1921	68.305
ce260f89-e45b-42c2-9006-aa2134db1768.K562.5EU.60.labeled.III;0_NR_132737	chr1	+	42682439	42702357	19919	61M903N64M10023N34M2675N90M353N303M235N83M3518N266M934N377M	1.25423	23.5914	103.287	1.46112	21.1804	57.58
0b7776f6-2fab-4c78-977a-424725ab463c.K562.5EU.0.unlabeled.II;0_NR_132737	chr1	+	42682439	42702360	19922	293M671N64M10023N34M2675N90M353N303M235N3867M934N380M	2.97316	29.7438	74.645	2.46982	23.097	88.61
98a6a40c-0542-4e96-b753-6434adf4401a.K562.5EU.1440.labeled.II;0_NR_132737	chr1	+	42682439	42702360	19922	293M671N64M10023N34M2675N75M368N303M235N83M3518N266M934N380M	1.7882	20.8413	54.1925	0.902446	28.1921	49.81
cac09c3d-ebbd-4f27-bc00-eb2323b8133b.K562.5EU.60.labeled.IV;0_NR_132737	chr1	+	42682439	42702360	19922	293M671N64M12762N3D57M353N303M235N83M3518N266M934N380M	1.1376	29.2185	NA	0.860945	28.7409	107.71
NM_004559_132737	chr1	+	42682439	42702360	19922	293M671N64M10023N34M2675N90M353N303M235N83M3518N266M934N380M	10.4827	21.3388	72.955	7.18161	18.3768	80.31
NM_004559_132737-1	chr1	+	42682439	42702357	19919	293M671N64M10023N34M2675N90M353N303M235N83M3518N266M934N377M	8.82665	22.6531	72.485	5.92089	18.4972	65.87
3374e088-3e05-402b-977b-fa4d60aba6b6.K562.5EU.60.labeled.IV;0_NR_132737	chr1	+	42682439	42702360	19922	293M671N64M10023N3455M235N83M3518N266M934N380M	0.734252	39.7738	80.255	0.89588	23.5914	53.79
7dd0a71d-51f2-4e30-a6b0-e7fd0d0b265b.K562.5EU.0.unlabeled.III;0_NR_132737	chr1	+	42682439	42702360	19922	293M671N64M10023N34M2705N3D57M353N303M235N83M3518N266M934N380M	0.994437	28.4315	NA	0.670599	26.3128	63.87
3df2405e-600e-42d1-b95d-765724ac3ce1.K562.5EU.60.labeled.VI;0_NR_132737	chr1	+	42682439	42702314	19876	293M671N64M10023N34M2675N90M353N621M3518N266M934N334M	0.712909	18.7134	59.4525	0.383764	18.2912	-1
4e0985cb-838a-4c84-8697-67de49f16051.K562.5EU.60.labeled.heat.IV;0_NR_132737	chr1	+	42682439	42702357	19919	293M671N64M10023N34M2675N90M353N303M235N83M3536N248M934N377M	0.932406	14.2645	NA	0.554518	20.2817	75
0960267d-266d-4376-878c-a1ba88fc5043.K562.5EU.60.labeled.IV;0_NR_132737	chr1	+	42682439	42703781	21343	293M671N64M10023N34M2675N90M891N83M3518N266M934N1801M	0.852829	27.3302	NA	0.330439	32.1677	36.69
97d97b97-65cd-4492-97ac-de635f61f8ba.K562.5EU.60.labeled.IV;0_NR_132737	chr1	+	42682439	42702357	19919	293M671N64M10023N34M2675N90M353N303M235N83M3518N266M939N372M	0.40996	29.3284	64.1925	0.225612	28.1921	66.46
4599a7d0-a940-4913-9c33-dc54ca100450.K562.5EU.60.labeled.heat.V;0_NM_004559	chr1	+	42682439	42702360	19922	293M671N64M10023N34M3656N83M3518N266M934N380M	0.753177	31.9851	90.81	0.454046	21.6944	70.28
2f4124b6-627b-48f3-8817-ffbc628ca5ab.K562.5EU.60.labeled.IV;0_NR_132737	chr1	+	42682439	42702360	19922	286M678N64M10023N34M2675N90M353N303M235N83M3518N266M934N380M	2.15903	22.8294	60.14	1.76723	21.9003	64.615
42ac561a-3519-42ad-9be4-19927fea5649.K562.5EU.0.unlabeled.III;0_NR_132737	chr1	+	42682439	42702360	19922	293M671N64M10023N34M2675N90M353N303M235N31M3570N266M934N380M	0.337778	44.423	63.56	0.503726	20.9408	62.205
e56e5f63-d99d-4562-9a28-e96ad7639bea.K562.5EU.60.labeled.II;0_NR_132737	chr1	+	42682439	42702360	19922	293M671N64M10023N2799M353N303M235N83M3518N266M934N380M	4.78391	22.3655	83.72	3.39396	16.317	58.6
f8c20eff-451f-4059-a18c-8fbc889b0fa1.K562.5EU.1440.labeled.II;0_NR_132737	chr1	+	42682439	42702360	19922	293M671N64M10023N34M3118N303M235N83M3518N266M934N380M	1.37185	18.9407	74.84	0.627446	27.0104	14.38
1f2984a3-df37-4a7b-be4c-8b69fa585690.K562.5EU.1440.labeled.I;0_NR_132737	chr1	+	42682439	42702314	19876	293M671N64M13713N83M3518N266M934N334M	0.0231049	62.6087	NA	0.0231049	62.6087	NA
05762998-d2fa-48df-82ca-826d121e83f6.K562.5EU.1440.labeled.II;0_NR_132737	chr1	+	42682439	42702256	19818	293M671N64M13175N303M235N83M3518N1476M	NA	NA	NA	NA	NA	NA
8408cce5-f50d-4408-a4c0-04818f85727d.K562.5EU.0.unlabeled.I;0_NR_132737	chr1	+	42682439	42702357	19919	293M671N64M10023N34M2675N90M353N303M250N68M3518N266M934N377M	0.359437	27.5138	69.1375	0.346736	34.8054	81.45
NR_132737_132737-2	chr1	+	42682439	42702357	19919	927M10124N34M2675N90M353N303M235N83M3518N266M934N377M	1.51118	20.9408	57.6525	1.33518	20.5352	85.39
NM_004559_132737-3	chr1	+	42682473	42702357	19885	259M671N64M10023N34M2675N90M353N303M235N83M3518N266M934N377M	3.23521	18.6644	62.865	1.429	24.6684	67.38
cc3d6474-1d2a-4f3f-b310-e870220f61ca.K562.5EU.0.unlabeled.I;0_NR_132737-1	chr1	+	42682701	42702360	19660	31M671N64M12732N90M353N303M235N83M3518N266M934N380M	1.25075	25.9519	NA	0.990026	22.7583	88
9aee0e99-777c-418e-8257-9e97005751c4.K562.5EU.1440.labeled.II;0_NR_132737	chr1	+	42683180	42702360	19181	287M10023N34M3118N303M235N83M3518N266M934N380M	1.41451	29.504	74.1075	0.938839	26.3128	65.69
49b9c874-3023-460c-a8cc-86212a16e8b1.K562.5EU.60.labeled.heat.I;0_NR_132737	chr1	+	42683402	42702357	18956	65M10023N34M2675N746M235N83M3518N1577M	0.358352	23.5914	NA	0.18546	42.3201	-1
63edc9fb-6859-4746-8dd9-37137c8f0b82.K562.5EU.60.labeled.IV;0_NR_132737-2	chr1	+	42695714	42702352	6639	1231M235N83M3518N266M939N367M	0.200662	35.392	68.035	0.0425688	86.2938	77.48
e80e0165-2d53-48ad-871d-bd99cc622011.K562.5EU.0.unlabeled.I;16_chr1:42746000	chr1	+	42746376	42767019	20644	476M419N141M310N80M2I1M403N112M1868N151M1937N94M167N127M2204N117M174N60M5D321N4D93M4D2141N138M1D2M1I4M930N1I124M217N190M2932N147M4029N2M1D2M1D515M	0.446394	25.2805	154.69	0.317706	28.9322	182.87
4585f052-0f71-401e-ad50-7516b0c2d87e.K562.5EU.60.labeled.heat.I;16_chr1:42746000	chr1	+	42746376	42767019	20644	1036M310N80M2I1M403N112M1868N151M1937N94M167N127M2204N351M5D321N4D93M4D2141N138M1D2M1I4M930N1I124M217N190M2932N147M4029N2M1D2M1D515M	0.446394	25.2805	43.27	1.13338	13.5815	214.32
2a18f2de-2330-44ad-9fd8-b5f2f1dcba56.K562.5EU.0.unlabeled.II;16_chr1:42765000	chr1	+	42765436	42767018	1583	1583M	0.0462098	62.6087	NA	0.0191788	160.698	90.375
NM_024097_040733-1	chr1	+	42767277	42775527	8251	114M118N116M5938N87M1087N132M340N319M	0.282746	58.6818	117.787	0.259678	58.3248	86.25
NM_024097_040733	chr1	+	42767301	42775942	8642	90M118N116M5938N87M1087N132M340N734M	0.152715	46.8654	12.75	0.0796737	122.738	140.13
a33dfc38-8d27-4d08-803b-7c97d2d05747.K562.5EU.60.labeled.heat.II;0_NR_040733	chr1	+	42767301	42800813	33513	90M6172N87M1087N132M340N271M18121N144M668N201M3484N2716M	0.0202733	110.437	NA	NA	NA	NA
1a5cbfb1-da52-4174-990d-fef3df30d811.K562.5EU.60.labeled.heat.I;0_NR_040733	chr1	+	42767301	42775527	8227	90M6155N104M1087N132M340N319M	NA	NA	NA	NA	NA	NA
ea83d508-5c24-482d-b9fb-832a4af076f1.K562.5EU.60.labeled.VI;0_chr1:42778000	chr1	+	42778410	42781984	3575	3575M	0.0231049	62.6087	NA	NA	NA	NA
8ed67ae4-34eb-437c-8e55-ea2747b94782.K562.5EU.60.labeled.V;16_chr1:42807000-1	chr1	+	42807052	42817365	10314	449M8930N152M2D607N174M	0.638564	51.7256	73.9675	0.549306	38.8778	83.875
2540becd-2091-43b2-af73-bf69d700205a.K562.5EU.60.labeled.heat.I;16_chr1:42807000-1	chr1	+	42807052	42817365	10314	449M8930N175M584N176M	0.0693147	62.6087	15.375	0.152715	46.8654	112.85
74d5a8b7-b3bb-4104-92f9-08fd6eca126a.K562.5EU.60.labeled.heat.III;0_NM_018538	chr1	+	42825392	42844909	19518	40M191N116M9299N117M577N33M1393N33M1710N21M1111N21M98N27M91N27M2220N2393M	NA	NA	NA	NA	NA	NA
26803d6c-0e0c-446d-b187-725a2ecfef7e.K562.5EU.0.unlabeled.I;0_NM_018538	chr1	+	42825604	42845922	20319	5512M3922N117M577N1459M1710N1278M91N5653M	0.0925488	225.178	112.58	0.118892	126.875	110.68
d2efdcc0-f6c9-4a03-8c76-7d1fd2c2aecb.K562.5EU.60.labeled.IV;0_NM_018538	chr1	+	42825627	42844977	19351	112M4705N90M234N348M3922N117M577N29M4509N27M2220N2461M	NA	NA	NA	0.0231049	62.6087	NA
49ceb0f2-e08a-4a6a-955c-2e2f2195a6a7.K562.5EU.0.unlabeled.III;16_chr1:42841000	chr1	+	42841911	42846395	4485	103M761N144M4D1M483N43M1060N175M1572N139M	0.277259	30.6383	57.18	0.109861	38.8778	NA
23f0644c-85d8-4b1a-ae58-475a778e4a5e.K562.5EU.60.labeled.IV;0_NM_001242739	chr1	+	42846629	42852475	5847	29M2633N123M1536N1526M	0.0185953	214.086	91.1	0.130777	43.6881	48.33
NM_015911_015911	chr1	+	42846629	42852475	5847	29M4292N1526M	0.0652885	78.3609	38.5225	0.109861	38.8778	NA
611f1fc7-d542-4c03-8d66-17a65d945c37.K562.5EU.60.labeled.VI;16_chr1:42925000	chr1	+	42925970	42958856	32887	1272M363N206M1124N1I100M1D175N104M280N2I186M92N993M179N158M12016N3D100M15312N223M	0.652205	60.9257	29.385	0.479584	55.5389	142.21
ccdfade8-763b-4c8c-9f73-51876f71767d.K562.5EU.60.labeled.IV;16_chr1:42926000	chr1	+	42926162	42958856	32695	1649M1124N1I100M1D175N104M280N2I186M92N160M588N1M2D579M12016N3D100M15312N223M	0.38428	33.2165	90.5	0.111125	72.0459	45.95
391207ca-8527-4bb2-ac7e-3dc15edc9ee9.K562.5EU.0.unlabeled.III;16_chr1:42926000	chr1	+	42926162	42958823	32662	1080M363N206M1124N1I100M1D175N104M280N2I438M588N1M2D242M179N158M12016N3D100M15312N190M	0.273916	49.7405	118.725	0.310174	36.6657	146.88
cd9c7fb1-b647-4796-be10-523730d3cb5e.K562.5EU.0.unlabeled.II;16_chr1:42925000	chr1	+	42926162	42958856	32695	1080M363N206M1124N1I100M1D175N104M280N2I186M92N160M588N1M2D242M179N158M12016N3D100M15312N223M	0.35967	45.7327	119.418	0.175094	49.1253	NA
a46d4e9c-83c3-4f5a-9c1a-a90b2d48e697.K562.5EU.60.labeled.I;16_chr1:42926000	chr1	+	42926218	42930748	4531	1017M368N2M5I196M1124N4M1I106M1D175N570M92N876M	0.200662	35.392	122.09	0.0924196	30.6383	NA
54fbe95e-4b0c-49c4-a7b2-0f797d80f365.K562.5EU.60.labeled.IV;16_chr1:42926000	chr1	+	42926238	42958856	32619	1004M363N206M1124N1I100M1D175N104M280N2I186M92N160M588N1M2D242M175N162M12016N3D100M15312N223M	0.179176	23.5914	12.27	0.0202733	110.437	NA
cd9c7fb1-b647-4796-be10-523730d3cb5e.K562.5EU.0.unlabeled.II;16_chr1:42925000-2	chr1	+	42926293	42958928	32636	949M363N206M1124N1I100M1D175N104M280N2I186M92N160M588N1M2D242M179N158M12016N3D100M15312N295M	NA	NA	NA	0.0549306	38.8778	NA
ffbf525e-bc34-4424-b712-283b1d50c8ac.K562.5EU.60.labeled.IV;16_chr1:42951000-1	chr1	+	42951620	42958928	7309	309M6703N297M	0.0425688	86.2938	81.555	NA	NA	NA
NR_033967_033967	chr1	+	42959027	42983352	24326	551M10671N146M3579N215M8936N228M	0.0182322	271.042	NA	NA	NA	67.35
5bacce0e-505e-46bb-a47c-047864b71f1e.K562.5EU.60.labeled.heat.I;16_chr1:43164000-1	chr1	+	43164184	43172310	8127	310M149N162M2020N97M240N76M1703N88M1727N124M599N173M234N84M83N84M135N2M3D34M	0.427137	57.3726	71.93	0.401324	35.392	38.3
22959475-bcc3-4323-8fe8-9f57f4ffc434.K562.5EU.1440.labeled.II;16_chr1:43164000	chr1	+	43164195	43172272	8078	299M149N162M2020N97M240N76M1703N88M1727N124M599N491M83N220M	1.78051	54.9652	71.2025	1.33165	36.2871	56.945
2c6cf968-2cdc-41c5-87a9-d461ff3db2d6.K562.5EU.60.labeled.II;16_chr1:43164000	chr1	+	43164311	43172272	7962	183M149N162M2354N79M1703N88M1727N124M599N173M234N84M83N220M	NA	NA	-0.5	0.0924196	30.6383	43.54
32458999-c941-4926-986b-1e97acc9361e.K562.5EU.0.unlabeled.I;16_chr1:43164000	chr1	+	43164311	43172272	7962	183M149N162M2020N97M240N76M1703N88M1727N124M599N173M237N81M83N220M	0.503726	20.9408	44.96	0.26824	26.3128	73.38
d5bca99f-b0b6-49c7-9230-807c38867743.K562.5EU.60.labeled.II;16_chr1:43164000	chr1	+	43164311	43172268	7958	183M149N162M2020N97M240N76M1703N88M1727N896M234N84M83N216M	1.06469	50.5411	60.865	0.739357	30.6383	55.07
2e40daa6-7fbd-4212-89a2-e5d7fa30c72a.K562.5EU.60.labeled.IV;16_chr1:43164000	chr1	+	43164354	43172241	7888	140M149N2279M240N76M1703N3029M83N189M	0.152715	46.8654	40.11	0.0185953	214.086	NA
1abaa70b-d465-4956-94e8-022c2fbf7573.K562.5EU.60.labeled.IV;16_chr1:43237000	chr1	+	43237339	43270934	33596	339M24162N70M8990N1M1I4M2I30M	NA	NA	NA	NA	NA	NA
08f0c49c-0f26-4a97-8307-164f59b27971.K562.5EU.60.labeled.IV;0_NM_001255-1	chr1	+	43358939	43363188	4250	68M160N239M84N149M86N97M147N129M95N197M109N95M139N229M158N126M949N118M638N238M	0.213569	57.3726	72.4475	0.0763576	46.8654	NA
NM_001255_001255	chr1	+	43358963	43363188	4226	44M160N230M93N149M86N97M147N129M95N197M109N95M139N229M158N126M949N118M638N238M	1.20968	45.5156	89.245	0.894117	46.4126	86.52
a921e1b9-ee47-4e3c-9888-79ab4cddbe56.K562.5EU.1440.labeled.II;0_NM_001255	chr1	+	43358963	43363188	4226	44M160N230M93N149M3312N238M	NA	NA	NA	NA	NA	NA
b967da63-cf88-4e5d-8642-fc0c3b29ecc9.K562.5EU.1440.labeled.II;0_chr1:43358000-2	chr1	+	43358963	43363157	4195	676M3312N207M	NA	NA	NA	NA	NA	NA
86e945a9-5be7-4eb7-8429-e7f28654bbfb.K562.5EU.1440.labeled.II;0_NM_001255	chr1	+	43358987	43363188	4202	46M134N230M93N149M86N97M147N129M95N401M139N229M158N126M949N118M638N238M	0.203254	67.8478	75.525	0.238202	32.7368	NA
a64ea3c2-1b71-4b00-a227-2a59f939c3fd.K562.5EU.60.labeled.heat.I;0_NM_001255	chr1	+	43359166	43363188	4023	231M93N149M86N97M147N129M95N197M109N95M139N229M158N1193M638N238M	0.231049	62.6087	85.7925	0.146156	33.9811	NA
083cc05c-e01c-443a-8d4a-577b12d329c5.K562.5EU.1440.labeled.II;0_NM_001255	chr1	+	43359166	43363161	3996	240M84N149M86N97M147N129M95N197M109N95M139N229M158N1193M638N211M	0.0425688	86.2938	60.66	NA	NA	NA
f4c3cfaa-0962-4f8e-8bc5-d55e511a756f.K562.5EU.1440.labeled.II;0_NM_001255	chr1	+	43359166	43363161	3996	231M93N149M86N97M147N129M2853N211M	NA	NA	NA	NA	NA	NA
38aca42e-5b75-4fc4-b0ba-f7854efb0eb4.K562.5EU.0.unlabeled.I;0_NM_001255	chr1	+	43359166	43363188	4023	231M93N149M86N97M147N129M95N197M109N95M139N229M158N126M1705N238M	NA	NA	NA	0.0231049	62.6087	NA
ddb9b1cc-bf33-4278-becb-881a26d9789d.K562.5EU.60.labeled.heat.III;0_NM_001255	chr1	+	43359166	43363188	4023	231M93N149M86N97M147N129M95N197M109N463M158N126M949N118M638N238M	0.30582	58.9839	78.51	0.107799	81.5283	121.05
77f736c3-b225-4a6f-a5d6-e02970fc9b3a.K562.5EU.1440.labeled.II;0_NM_001255	chr1	+	43359497	43363145	3649	325M147N129M95N197M109N95M139N229M1233N951M	NA	NA	NA	NA	NA	87.3
6b518314-0ed2-4068-bdd8-df84aa3baff6.K562.5EU.60.labeled.heat.I;0_NM_001255	chr1	+	43360279	43363188	2910	111M109N95M139N513M949N118M638N238M	0.109861	38.8778	NA	0.107799	81.5283	92.075
44edd40e-089c-42df-9009-1c7d99ed6be9.K562.5EU.0.unlabeled.II;16_chr1:43363000	chr1	+	43363407	43367999	4593	732M1D2M185N468M133N697M2D5M2289N79M	0.15702	135.208	NA	0.360394	68.5032	116
667a1f9f-3686-467c-a64f-214e64ff1f9b.K562.5EU.0.unlabeled.II;16_chr1:43363000	chr1	+	43363407	43367999	4593	732M1D2M185N135M1D80N101M90N61M133N83M2D2M1I2M4D172N184M187N61M2D5M2289N79M	0.258002	125.6	46.7	0.436011	45.9328	142.62
0ccc072a-0297-40a0-90fe-93c3859bdc75.K562.5EU.60.labeled.VI;16_chr1:43363000	chr1	+	43363407	43367999	4593	732M1D2M185N135M1D80N101M90N61M133N81M555N61M2D5M2289N79M	0.0583832	143.621	66.62	0.0775387	147.859	120
0055a3c9-65cf-4b27-90ec-bfd6effe7851.K562.5EU.60.labeled.heat.V;16_chr1:43383000	chr1	+	43383908	43389786	5879	1198M871N248M362N86M187N140M1D503N147M662N177M1269N28M	0.734252	39.7738	109.218	0.404074	47.8549	NA
e5db6d22-3a8c-4f3a-be7a-81da50a60408.K562.5EU.0.unlabeled.I;16_chr1:43383000	chr1	+	43383908	43389786	5879	1198M871N248M362N86M187N140M1D503N147M2111N25M	0.105193	91.0784	NA	0.103094	100.711	106.62
66a2ff53-ed5e-4193-b618-d40c7f1c74a3.K562.5EU.60.labeled.heat.V;16_chr1:43383000	chr1	+	43383908	43389786	5879	1198M871N248M362N81M3D2M187N140M1D503N147M662N116M1330N28M	0.30582	58.9839	85.5325	0.18546	42.3201	103.92
6de62906-12fd-4cbf-a849-5c55e9af48d8.K562.5EU.60.labeled.III;16_chr1:43383000	chr1	+	43384731	43389786	5056	375M871N248M362N86M187N140M1D503N147M662N116M1330N28M	0.476404	32.7368	56.615	0.261554	43.6881	136.155
0e9d3243-4eb9-40c7-a71c-a91fe525d895.K562.5EU.60.labeled.IV;16_chr1:43384000	chr1	+	43384731	43388595	3865	375M871N248M362N86M187N107M536N1093M	NA	NA	51.015	NA	NA	NA
5c719d94-63af-4853-a6e2-cd762cd58063.K562.5EU.1440.labeled.II;16_chr1:43384000	chr1	+	43384784	43387001	2218	1441M362N86M187N142M	0.0549306	38.8778	54.685	NA	NA	NA
6de62906-12fd-4cbf-a849-5c55e9af48d8.K562.5EU.60.labeled.III;16_chr1:43383000-2	chr1	+	43384784	43389813	5030	322M871N248M362N86M187N140M1D503N147M662N116M1330N55M	0.454046	21.6944	28.3075	0.329584	19.18	78.13
40dfd90b-700d-40e1-a803-bd92fc6388a6.K562.5EU.0.unlabeled.I;0_NM_015284	chr1	+	43442921	43451161	8241	166M101N80M84N126M119N200M2097N91M194N81M82N75M538N214M376N154M150N123M107N406M127N117M1374N69M165N825M	0.0392551	135.208	NA	0.0425688	86.2938	NA
310c5903-62fb-4978-996e-08993e3bdf7a.K562.5EU.60.labeled.heat.III;0_chr1:43451000	chr1	+	43451768	43454233	2466	2466M	0.0202733	110.437	-0.5	0.146156	33.9811	56.57
53026efd-0d82-4307-99e1-778479d53a2e.K562.5EU.0.unlabeled.II;0_chr1:43452000	chr1	+	43452438	43454246	1809	595M471N743M	0.0231049	62.6087	NA	NA	NA	NA
bb0399b8-9510-4cc1-95ce-b420e4148478.K562.5EU.60.labeled.heat.I;0_NM_130440	chr1	+	43530853	43623658	92806	238M7107N80M6753N136M8325N146M162N142M15648N189M9031N111M9810N270M1971N582M258N137M508N145M5146N306M666N194M4502N118M77N579M713N98M189N254M85N94M617N219M358N152M2414N116M4119N98M3729N124M167N176M718N120M298N155M85N286M106N179M236N127M232N126M258N155M104N136M702N1724M	0.0775387	147.859	NA	0.0924196	62.6087	110.33
4b3dc02a-70a9-4b01-8250-8b555448f30a.K562.5EU.60.labeled.IV;0_NM_130440	chr1	+	43545041	43623618	78578	126M8325N146M162N142M15648N189M9031N111M9810N270M1971N582M258N137M508N145M6118N194M4502N118M77N579M713N98M189N254M85N94M617N219M355N155M2414N116M4119N98M3729N124M167N176M718N120M298N155M85N286M106N179M236N127M232N126M258N155M104N136M702N1684M	0.0462098	62.6087	NA	0.0693147	62.6087	NA
2ef3c4a3-f048-49d6-9236-eb7f3d63604e.K562.5EU.60.labeled.heat.III;0_NM_130440	chr1	+	43617725	43623664	5940	187M718N120M298N155M85N286M106N179M236N127M232N126M258N155M104N136M702N1730M	0.0392551	135.208	NA	0.0557859	214.086	112.625
NM_014663_014663	chr1	+	43650162	43705516	55355	91M2884N177M2277N176M4531N115M2481N194M2608N50M706N104M398N138M680N248M1080N200M2205N371M11808N121M5109N182M1749N205M446N77M683N56M1682N109M606N186M2948N171M5603N120M283N93M117N1287M	0.326443	78.3609	109.075	0.358052	56.3249	124.65
0ccf67b8-8797-4017-b7b7-3cf58524850f.K562.5EU.60.labeled.VI;0_chr1:43705000	chr1	+	43705623	43708808	3186	3186M	NA	NA	NA	NA	NA	NA
07c9af71-03d6-4d77-98ad-5d6e1406cbcc.K562.5EU.60.labeled.I;0_NM_174963	chr1	+	43707534	43917026	209493	160M28539N193M55676N48M22741N43M9797N162M13326N93M56071N95M3757N64M869N96M277N187M16880N419M	NA	NA	58.71	0.0549306	38.8778	282
NM_006279_174963-1	chr1	+	43707534	43931163	223630	160M28539N148M55721N48M22741N43M23285N93M56071N95M3757N64M869N96M277N187M20676N147M231N147M9203N1032M	0.402359	26.3128	90.21	0.220448	52.1296	84.46
a8aa737f-4a61-44ed-b054-19f1fe2967a5.K562.5EU.60.labeled.I;16_chr1:43937000	chr1	+	43937898	43941552	3655	3655M	NA	NA	NA	NA	NA	NA
8928c746-98da-4750-8cef-ec176f3b701a.K562.5EU.0.unlabeled.II;0_chr1:43946000	chr1	+	43946684	43950363	3680	3680M	0.0231049	62.6087	96.96	NA	NA	66.595
NM_014652_014652	chr1	+	43947141	43968022	20882	544M1732N737M6166N141M99N142M108N167M218N121M86N148M427N182M83N27M192N135M150N144M1359N81M546N138M152N97M3006N53M2253N67M82N59M147N90M295N182M89N437M	0.243279	53.1793	96.1475	0.197703	50.8162	62.11
64ae3795-7e35-41a0-b757-be5e4ecb3247.K562.5EU.60.labeled.II;0_NM_001319170	chr1	+	43969991	43973359	3369	332M273N113M257N1105M87N177M80N945M	0.0851376	86.2938	20.63	0.115525	62.6087	91.15
6108b398-d4ef-4e02-a6c7-095915e853cc.K562.5EU.0.unlabeled.II;0_NM_001319168	chr1	+	43969991	43973367	3377	280M325N1475M87N1210M	0.0550109	251.634	75.95	0.0364643	271.042	-1
NM_001384_001319170-1	chr1	+	43969991	43973367	3377	332M273N113M257N224M197N684M87N177M80N953M	0.0534126	397.408	46.25	0.130577	78.3609	118.31
49b8e3b0-d695-4ca2-bcca-48df4d71c198.K562.5EU.60.labeled.IV;0_NM_004047	chr1	+	43974446	43978296	3851	1728M128N78M210N70M113N444M764N316M	0.3104	72.7214	134.86	0.316201	42.8907	108.315
d44f6d24-008b-470f-8c14-95f2e071fdf0.K562.5EU.60.labeled.VI;0_NM_004047	chr1	+	43974951	43978296	3346	1223M128N1995M	0.51075	36.1713	162.79	0.22632	67.3235	181.43
ece31144-5feb-4175-ad8f-fd7aeb0a16a2.K562.5EU.60.labeled.heat.I;0_NM_004047	chr1	+	43974951	43978296	3346	898M241N290M210N70M113N52M201N191M764N316M	0.349941	40.7358	138.555	0.607467	31.4818	94.38
67a2a1ab-1763-4838-97af-ee95ad87276d.K562.5EU.60.labeled.heat.I;0_NM_004047	chr1	+	43974951	43978287	3337	357M782N84M128N78M393N52M201N1262M	NA	NA	NA	0.0462098	62.6087	NA
cdd2d489-10ad-4113-9841-00f44c1e12a1.K562.5EU.60.labeled.VI;0_NM_004047	chr1	+	43974951	43978296	3346	157M692N374M128N78M210N70M113N52M201N191M764N316M	2.6308	33.9811	112.603	2.29856	40.2996	107.165
NM_004047_004047	chr1	+	43974951	43978232	3282	157M692N49M241N84M128N78M210N70M113N52M201N191M764N252M	0.329584	38.8778	NA	0.493412	27.1953	51.54
NM_004047_004047-1	chr1	+	43974951	43978296	3346	157M692N49M241N84M128N78M210N70M113N52M201N191M764N316M	2.22707	47.5852	88.0225	2.35315	36.2369	142.435
45d3bd32-5096-4e16-9fd9-815de5452af9.K562.5EU.60.labeled.heat.IV;0_NM_004047	chr1	+	43974951	43978286	3336	153M986N84M128N78M210N70M113N52M201N191M764N306M	NA	NA	NA	0.0231049	62.6087	NA
NM_001039457_004047-1	chr1	+	43974951	43978296	3346	157M982N84M128N78M210N70M113N52M201N191M764N316M	0.529657	37.5996	37.885	0.349941	40.7358	82.35
d829e286-9ce5-4911-a9dd-7c9830e16df2.K562.5EU.60.labeled.V;0_NM_004047-1	chr1	+	43974951	43978296	3346	153M696N49M241N84M128N78M210N70M113N52M201N191M764N316M	0.739357	30.6383	97.315	0.568614	32.4076	62.59
114e0847-cdff-4188-9e29-57f02de662c3.K562.5EU.1440.labeled.I;0_NM_004047	chr1	+	43974951	43978296	3346	157M692N49M241N84M128N78M210N70M113N52M1156N316M	0.0182322	271.042	NA	NA	NA	NA
NM_004047_004047-3	chr1	+	43974952	43978296	3345	156M692N49M241N84M128N78M210N70M113N52M201N191M764N316M	1.6269	41.6457	97.43	1.7344	37.31	104.34
971e05d0-7a78-4159-98e4-c8f827933fcc.K562.5EU.1440.labeled.II;0_NM_004047	chr1	+	43974952	43978296	3345	156M692N49M241N290M210N70M113N52M201N191M764N316M	1.83431	26.5545	106.215	1.39976	40.7358	119.78
d829e286-9ce5-4911-a9dd-7c9830e16df2.K562.5EU.60.labeled.V;0_NM_004047	chr1	+	43974952	43978296	3345	152M696N49M241N84M128N78M210N70M113N52M201N191M764N316M	0.40482	40.4887	100.81	0.584558	37.7216	113.76
NM_003780_001005417-1	chr1	+	43979229	43991169	11941	283M1597N365M215N236M2940N191M222N123M116N105M4676N872M	0.384514	38.8778	117.73	0.381788	46.8654	109.475
a861f5a5-3796-4d8d-969f-ade5c5c188e9.K562.5EU.60.labeled.heat.III;0_NM_001005417	chr1	+	43979229	43991169	11941	388M1492N365M215N236M2940N191M222N123M116N105M4676N872M	0.213569	57.3726	31.2525	0.243279	53.1793	46.485
d53da563-23cc-43d1-9da2-d662bfd25991.K562.5EU.60.labeled.IV;0_NM_001005417	chr1	+	43979229	43991169	11941	283M1597N365M222N229M2940N191M222N123M116N105M4676N872M	0.0828639	98.2946	67.625	0.0988514	50.8162	NA
NM_001005417_001005417	chr1	+	43979229	43991169	11941	1386M494N365M215N236M2940N191M222N123M116N105M4676N872M	0.30543	46.8654	131.833	0.350187	49.1253	85.28
4f632168-b9c4-4393-b772-4466ed6c582c.K562.5EU.0.unlabeled.II;0_NM_001005417-1	chr1	+	43983364	43991169	7806	1692M222N123M116N105M4676N872M	0.0924196	62.6087	14.545	0.105193	91.0784	114.64
0036a26e-e8e6-4437-934c-14a78ac0d88a.K562.5EU.60.labeled.IV;16_chr1:43996000	chr1	+	43996484	44031345	34862	1259M3D3M112N165M2741N96M86N1I3M3D97M105N1M3D141M1D2M3D87N229M678N1M6D2M1D102M95N137M206N127M5365N2M3D3M1I269M1337N2D2M2D135M1D628N157M13366N1I113M1D6942N39M	0.111125	72.0459	80.925	0.161734	62.6087	-1
d8cf4de0-e964-4d65-9275-85387f054ae9.K562.5EU.60.labeled.heat.I;0_chr1:44030000-1	chr1	+	44030426	44040530	10105	124M9357N624M	0.0405465	110.437	NA	0.088168	74.4112	64.505
8000515e-5f54-4747-add5-f6b46cd05a79.K562.5EU.60.labeled.heat.III;0_NM_019100	chr1	+	44213468	44220679	7212	60M135N196M491N90M4D2M257N3767M118N168M300N186M164N72M328N73M138N293M249N121M	0.111125	72.0459	76.055	0.555739	16.3989	244.22
NM_001034023_019100	chr1	+	44213468	44220679	7212	60M181N150M491N90M4D2M257N196M3412N159M118N168M300N186M164N72M328N73M138N293M249N121M	0.225612	28.1921	46.5	0.184839	30.6383	122.825
60afba0e-6400-4603-942e-893952c09f38.K562.5EU.60.labeled.heat.IV;16_chr1:44221000-1	chr1	+	44221091	44355334	134244	548M26292N1M3D1M3D94M36799N1I2M2I73M23402N95M1D4M4766N49M6395N1M4D123M3D35512N73M	0.229073	46.8654	22.5	0.101366	110.437	134.79
165bd2c1-2d98-41bb-a785-8aabf6c73a51.K562.5EU.0.unlabeled.II;16_chr1:44221000	chr1	+	44221091	44355243	134153	548M26292N1M3D1M3D94M36799N1I2M2I73M23402N95M1D4M4766N49M6395N1M4D126M19300N267M13533N77M1D1965N351M	0.0775387	147.859	31.3025	0.0383576	160.698	24.385
73f087df-2d36-49e1-9ecb-d8b9072106e6.K562.5EU.60.labeled.heat.I;16_chr1:44221000	chr1	+	44221091	44355243	134153	548M26292N1M3D1M3D94M36799N1I2M2I73M23402N95M1D4M4766N49M6395N1M4D122M4D35143N351M	0.0924196	62.6087	48.81	NA	NA	53.74
87bd0b25-f068-42e5-b3d3-43d9db3e782b.K562.5EU.60.labeled.heat.I;16_chr1:44221000	chr1	+	44221091	44355229	134139	548M26292N1M3D1M3D94M36799N1I2M2I73M23402N95M1D4M4766N49M6395N1M4D123M3D33102N75M1D1965N337M	0.0191788	160.698	45.86	0.0851376	86.2938	NA
347f3861-71f0-4b9d-ac9b-ae5359d26627.K562.5EU.60.labeled.IV;16_chr1:44221000	chr1	+	44221091	44355243	134153	548M26292N1M3D1M3D94M36799N1I2M2I73M23402N95M1D4M4766N49M6395N1M4D126M19300N273M13527N77M1D1965N351M	0.1943	145.314	86.4175	0.1943	145.314	128.13
55c0559d-327c-4945-b756-37cb0d116994.K562.5EU.0.unlabeled.I;16_chr1:44221000-1	chr1	+	44221091	44355334	134244	548M26292N1M3D1M3D94M36799N1I2M2I73M23402N95M1D4M4766N49M6395N1M4D126M19300N273M15937N75M	0.282746	58.6818	89.54	0.243279	53.1793	103.46
653b2a5d-bf6e-4fa7-a2e0-c892f6c95f8a.K562.5EU.60.labeled.heat.I;16_chr1:44221000	chr1	+	44221091	44353314	132224	550M20274N167M1D5857N93M36799N1I2M2I73M23402N95M1D4M4766N49M6395N1M4D126M19300N263M13528N6M1I468M	0.0182322	271.042	56.955	0.0763576	46.8654	103.935
60afba0e-6400-4603-942e-893952c09f38.K562.5EU.60.labeled.heat.IV;16_chr1:44221000	chr1	+	44221091	44355277	134187	548M26292N1M3D1M3D94M36799N1I2M2I73M23402N95M1D4M4766N49M6395N1M4D123M3D35512N16M	0.107799	81.5283	76.32	0.359437	27.5138	98.67
f56ac127-0201-431c-9e84-5ca147e0f7fb.K562.5EU.60.labeled.heat.I;0_NM_001319957	chr1	+	44631979	44651724	19746	234M130N43M3159N44M441N133M8535N97M200N85M4D2M135N56M133N79M4172N109M113N75M746N1021M	0.266169	54.0377	NA	0.144551	54.7527	95.7
6a1030ed-c3e3-424e-840b-866b9d341b5a.K562.5EU.60.labeled.IV;0_NM_001319957	chr1	+	44631979	44651724	19746	230M134N43M3159N122M363N133M8535N97M200N85M4D2M135N56M133N79M4172N109M113N80M741N1021M	0.0608198	110.437	82.3	0.0763576	46.8654	69.03
c60b7566-70da-4869-97f8-aef6b925b050.K562.5EU.60.labeled.IV;0_NM_001319957	chr1	+	44631979	44651724	19746	230M134N43M3159N44M441N133M8535N97M200N85M4D2M135N56M133N79M4172N109M113N75M746N1021M	0.147743	89.7093	NA	0.127706	86.2938	224.87
a5ae5767-5b83-48a5-ad02-a3ad544e8597.K562.5EU.60.labeled.IV;0_NM_001319957	chr1	+	44631979	44651724	19746	230M134N43M3159N122M363N133M8535N97M200N85M4D2M135N56M133N79M4172N109M113N75M746N1021M	0.369678	62.6087	58.3925	0.349941	40.7358	129.16
88764d2c-0f6d-4b75-b294-93188121fb4d.K562.5EU.1440.labeled.I;0_NM_001319957	chr1	+	44648452	44651724	3273	1318M113N1842M	0.0575364	160.698	55.4975	0.0608198	110.437	117.26
63ec83f6-a9bc-4ec8-94b4-1314ac1c1dd9.K562.5EU.60.labeled.heat.I;0_NM_006845	chr1	+	44739816	44767734	27919	187M910N95M6376N102M166N49M2741N123M2567N123M478N101M916N96M1083N55M91N163M1318N91M261N64M77N92M1065N143M931N205M86N132M1213N68M362N106M93N114M4167N124M147N638M	0.266169	54.0377	93.0825	0.197703	50.8162	96.325
NM_006845_006845-2	chr1	+	44739848	44767734	27887	155M910N95M6376N102M166N49M2741N123M2567N123M478N101M916N96M1083N55M91N163M1318N91M261N64M77N92M1065N143M931N205M107N111M1213N68M362N106M93N114M4167N124M147N638M	1.46156	33.9811	82.335	1.36214	21.6944	115.745
NM_001297655_006845-2	chr1	+	44739874	44767771	27898	129M910N95M6376N102M166N49M2741N123M3168N101M916N96M1083N55M91N163M1318N91M261N64M77N92M1065N143M931N205M107N111M1213N68M362N106M93N114M4167N124M147N675M	0.410527	103.134	110.11	0.309283	100.711	118
53aac6b4-79de-4bb4-bfcb-8b13f9af1b6d.K562.5EU.60.labeled.heat.I;0_NM_006845	chr1	+	44760590	44767732	7143	113M1213N743M4171N120M147N636M	0.0549306	38.8778	NA	0.0202733	110.437	67.43
96c8151b-471d-4c75-9fa6-22ff9acbea31.K562.5EU.60.labeled.V;0_NM_001012-2	chr1	+	44775535	44778731	3197	66M433N107M534N98M841N176M210N130M446N156M	3.91908	27.946	88.56	3.62371	23.9184	80.395
79f05516-7f61-4a5e-a0ec-2a48ee3d4f63.K562.5EU.60.labeled.heat.IV;0_NM_001012-2	chr1	+	44775535	44778731	3197	66M433N107M534N40M899N176M210N130M446N156M	1.61426	27.1237	85.5925	1.42884	25.6756	68.46
f249c7bf-5a20-4eb3-82ba-da903becc6ed.K562.5EU.60.labeled.heat.IV;0_NM_001012-2	chr1	+	44775535	44778731	3197	66M433N107M534N104M835N176M210N130M446N156M	2.57651	33.8684	72.1275	3.08476	26.3128	75.305
a0ed496d-47e7-43e4-844e-b3030650d91d.K562.5EU.60.labeled.heat.III;0_NM_001012	chr1	+	44775552	44778731	3180	49M433N107M534N100M839N59M327N130M446N156M	NA	NA	NA	0.13412	26.3128	53.85
82a8f651-0384-43cb-b242-2c603e35d47a.K562.5EU.60.labeled.VI;0_NM_001012	chr1	+	44775552	44778731	3180	49M433N107M534N104M835N124M262N130M446N156M	0.184839	30.6383	63.99	0.146156	33.9811	-1
f8d2c806-bdcb-49e0-805c-85809b1179d4.K562.5EU.0.unlabeled.III;0_NM_001012-2	chr1	+	44775552	44778706	3155	49M433N107M534N1115M210N707M	0.0549306	38.8778	NA	0.12164	53.1793	155.47
NM_001012_001012-1	chr1	+	44775552	44778731	3180	49M433N107M534N100M839N176M210N130M446N156M	55.6495	29.5536	77.1825	54.9945	26.0096	84.14
NM_001012_001012-2	chr1	+	44775552	44778706	3155	49M433N107M534N100M839N176M210N130M446N131M	8.6172	25.625	95.545	7.22139	23.3119	86.87
8bfe8911-5b94-4dfa-aff3-0148a4728904.K562.5EU.60.labeled.heat.IV;0_NM_001012	chr1	+	44775586	44778731	3146	15M433N107M534N100M839N176M210N130M485N117M	0.13412	26.3128	NA	0.179176	23.5914	NA
96c8151b-471d-4c75-9fa6-22ff9acbea31.K562.5EU.60.labeled.V;0_NM_001012-1	chr1	+	44775586	44778706	3121	15M433N107M534N98M841N176M210N130M446N131M	0.879228	17.5553	NA	0.446394	25.2805	NA
32d2e074-2c1a-47c4-9d78-3e1bc5602839.K562.5EU.60.labeled.heat.II;0_NM_001012	chr1	+	44775586	44778731	3146	15M433N107M534N100M839N176M210N130M462N140M	0.38428	33.2165	NA	0.439614	17.5553	80.675
0448ca26-d90e-42ed-940e-4966ebf39bd9.K562.5EU.60.labeled.IV;0_NM_001012-1	chr1	+	44775586	44778731	3146	555M1473N176M210N130M446N156M	0.292311	33.9811	-1	0.503726	20.9408	-1
896b1613-8ce8-47ab-beba-5b6661713a50.K562.5EU.0.unlabeled.II;0_NM_001012	chr1	+	44775586	44778731	3146	15M433N107M534N100M839N176M210N153M462N117M	0.0924196	30.6383	NA	NA	NA	NA
3a28b357-cc3c-4352-8c8c-b98992be5ace.K562.5EU.60.labeled.heat.V;0_NM_001012	chr1	+	44775586	44778731	3146	15M433N107M534N98M860N157M210N130M446N156M	0.867112	14.534	NA	0.255375	36.1713	NA
79f05516-7f61-4a5e-a0ec-2a48ee3d4f63.K562.5EU.60.labeled.heat.IV;0_NM_001012	chr1	+	44775586	44778731	3146	15M433N107M534N40M899N176M210N130M446N156M	1.70139	18.9875	84.355	1.41143	21.4314	65.91
12c19e0a-9b1a-47a7-82ed-1e6916a5e669.K562.5EU.60.labeled.heat.I;0_NM_001012	chr1	+	44775586	44778706	3121	15M433N107M534N100M839N124M262N130M446N131M	NA	NA	NA	0.0231049	62.6087	NA
09f265e8-a222-4267-a88e-e1c4e2892493.K562.5EU.1440.labeled.II;0_NM_001012	chr1	+	44775586	44778731	3146	15M433N107M534N100M839N176M210N153M439N140M	NA	NA	NA	0.0549306	38.8778	NA
35cfb54e-8acb-416a-8dc5-3375b22b62b0.K562.5EU.0.unlabeled.I;0_NM_001012	chr1	+	44775586	44778731	3146	15M433N107M534N1455M446N156M	0.537528	23.5914	60.49	0.13412	26.3128	34.2
3a6e7f9e-6855-4afd-a7f5-7479cc8c6c9c.K562.5EU.60.labeled.IV;0_NM_001012-1	chr1	+	44775586	44778706	3121	15M433N107M534N100M839N176M210N153M423N131M	NA	NA	NA	NA	NA	NA
96c8151b-471d-4c75-9fa6-22ff9acbea31.K562.5EU.60.labeled.V;0_NM_001012	chr1	+	44775586	44778731	3146	15M433N107M534N98M841N176M210N130M446N156M	3.1694	25.1446	80.795	3.22481	20.4921	60.9
f249c7bf-5a20-4eb3-82ba-da903becc6ed.K562.5EU.60.labeled.heat.IV;0_NM_001012	chr1	+	44775586	44778731	3146	15M433N107M534N104M835N176M210N130M446N156M	1.76327	28.4619	84.455	2.75145	17.3369	92.42
291d33f2-60bb-4fba-aaab-f0c8558db192.K562.5EU.1440.labeled.I;0_NM_001012	chr1	+	44775586	44778706	3121	15M433N107M1473N176M210N130M446N131M	NA	NA	NA	NA	NA	NA
12c19e0a-9b1a-47a7-82ed-1e6916a5e669.K562.5EU.60.labeled.heat.I;0_NM_001012-1	chr1	+	44775586	44778731	3146	15M433N107M534N100M839N124M262N130M446N156M	0.277259	20.2817	NA	0.146156	33.9811	63.4
3a6e7f9e-6855-4afd-a7f5-7479cc8c6c9c.K562.5EU.60.labeled.IV;0_NM_001012	chr1	+	44775586	44778731	3146	15M433N107M534N100M839N176M210N153M423N156M	NA	NA	NA	0.0924196	30.6383	NA
be8afd65-375a-4ce7-b3fb-08c1c6c65175.K562.5EU.1440.labeled.II;0_NM_001012	chr1	+	44775586	44778731	3146	15M433N107M534N104M854N157M210N130M446N156M	0.632373	22.261	58.49	0.359437	27.5138	76.035
2dce2e75-5a26-4daf-b930-26dca3361808.K562.5EU.60.labeled.VI;0_NM_001012	chr1	+	44775586	44778731	3146	15M433N741M839N176M210N130M446N156M	2.68017	30.6383	88.305	3.55312	20.3777	75.25
4af0ee60-c68b-4ddf-aa86-13dbdf9fe627.K562.5EU.1440.labeled.II;0_NM_001012	chr1	+	44775586	44778706	3121	555M534N100M839N124M262N707M	NA	NA	NA	NA	NA	193.125
c952878e-283e-4dfd-8108-4bee735adc01.K562.5EU.0.unlabeled.II;0_NM_001012	chr1	+	44775586	44778731	3146	15M2013N176M210N130M446N156M	0.401324	35.392	NA	0.312537	24.8163	60.97
NM_001012_001012	chr1	+	44775586	44778731	3146	15M433N107M534N100M839N176M210N130M446N156M	41.5382	29.6502	86.64	40.4356	26.8028	79.095
197fb7f7-232f-472e-a0c2-b602172c4df1.K562.5EU.0.unlabeled.II;0_NM_001012	chr1	+	44775586	44778731	3146	15M433N2698M	0.676539	33.5494	164.045	0.365015	37.0074	245.37
bf11c039-08c9-4970-9fed-3a72feb741c7.K562.5EU.1440.labeled.II;0_NM_001012-1	chr1	+	44775586	44778731	3146	555M534N1115M210N130M446N156M	0.936233	17.232	NA	0.76884	28.5012	77.44
16280553-2435-44a2-9a38-b496cbd994fd.K562.5EU.1440.labeled.II;0_NM_001012	chr1	+	44775586	44778688	3103	15M433N107M534N98M841N516M446N113M	NA	NA	NA	NA	NA	NA
b2a565a4-14b5-4b89-aeec-3cb4e2208150.K562.5EU.60.labeled.VI;0_NM_001012	chr1	+	44775586	44778731	3146	15M433N107M534N100M858N157M210N130M446N156M	0.716704	23.5914	71.815	0.625074	24.8163	49.96
65fa768a-01c0-4236-8960-9888471cd4e3.K562.5EU.60.labeled.IV;0_NM_001012	chr1	+	44775586	44778731	3146	15M433N107M534N65M874N176M210N130M446N156M	0.537528	23.5914	34.875	0.883443	19.8858	37.805
8724b775-7dd6-464c-99ad-de9736a1ebaa.K562.5EU.60.labeled.heat.IV;0_NM_001012	chr1	+	44775586	44778731	3146	15M1074N100M839N176M210N130M446N156M	1.25015	24.8163	NA	0.660878	32.1677	83.24
NM_001012_001012-3	chr1	+	44775586	44778706	3121	15M433N107M534N100M839N176M210N130M446N131M	7.44269	21.7436	83.0125	5.95938	23.5242	93.135
96dddbf5-5669-455a-840c-c304ae6f1f09.K562.5EU.1440.labeled.II;0_NM_001012	chr1	+	44775586	44778706	3121	15M433N1756M210N130M446N131M	NA	NA	NA	0.152715	46.8654	58.8
f249c7bf-5a20-4eb3-82ba-da903becc6ed.K562.5EU.60.labeled.heat.IV;0_NM_001012-1	chr1	+	44775586	44778706	3121	15M433N107M534N104M835N176M210N130M446N131M	0.677013	15.523	99.4925	NA	NA	NA
a2615e8c-46ea-4bcd-8afc-ed135bb00085.K562.5EU.60.labeled.VI;0_NM_001012	chr1	+	44775591	44778731	3141	292M151N107M534N100M839N176M210N130M446N156M	4.07095	26.5308	70.9425	4.16671	21.9557	97.435
a2615e8c-46ea-4bcd-8afc-ed135bb00085.K562.5EU.60.labeled.VI;0_NM_001012-1	chr1	+	44775591	44778706	3116	292M151N107M534N100M839N176M210N130M446N131M	1.48976	19.8103	61.0475	0.953119	28.9322	125.155
dfabd38b-cdd9-48b7-a5f1-bc596bfd50f1.K562.5EU.60.labeled.VI;0_NM_001012-2	chr1	+	44775891	44778731	2841	250M534N100M839N516M446N156M	0.537528	23.5914	49.1375	0.405557	22.5668	51.96
c549bd78-e2a3-4f40-9bda-06948a03ed4c.K562.5EU.1440.labeled.II;0_NM_001012-1	chr1	+	44776039	44778731	2693	102M1859N130M446N156M	NA	NA	NA	NA	NA	NA
efd54f33-8a92-4e79-822c-e1a60c446e95.K562.5EU.60.labeled.heat.V;0_NM_001012	chr1	+	44776039	44804823	28785	102M534N100M839N176M210N130M446N194M26010N44M	29.4717	32.0979	63.345	26.8404	30.8895	79.18
daf18c9b-fec0-446f-a36e-7af2e949b66a.K562.5EU.60.labeled.III;0_NM_001012	chr1	+	44777632	44778731	1100	14S158M210N130M446N156M	0.503726	20.9408	12.28	0.584988	27.7782	57.03
b49c6980-07f6-40c5-9791-2789d9667d62.K562.5EU.60.labeled.I;16_chr1:44780000	chr1	+	44780299	44780729	431	431M	NA	NA	NA	NA	NA	NA
63c9b0fd-bb01-4d5d-a457-57cc4b44ee68.K562.5EU.60.labeled.heat.I;0_NM_004073	chr1	+	44800335	44805989	5655	339M166N108M88N897M827N96M99N437M208N92M239N94M138N84M92N1041M107N503M	0.0851376	86.2938	49.055	0.0425688	86.2938	131.14
e64ec879-bb67-40b5-a825-09f3f882466e.K562.5EU.60.labeled.II;0_chr1:44814000	chr1	+	44814318	44815565	1248	1248M	0.0202733	110.437	NA	NA	NA	NA
fbf5113a-45e9-4098-9df3-cac0927799a7.K562.5EU.60.labeled.IV;16_chr1:44821000	chr1	+	44821939	44822663	725	725M	0.0185953	214.086	NA	NA	NA	NA
ce691eda-01aa-463d-9fbb-eee22f53ff01.K562.5EU.60.labeled.II;16_chr1:44850000-2	chr1	+	44850778	44986602	135825	226M23674N151M792N1I72M4122N194M1603N126M15615N90M29178N1M5D113M14766N162M36649N141M2558N2M2D161M3I3M5318N101M	0.0549306	38.8778	NA	0.0462098	62.6087	-1
72334827-adf2-4798-ab9a-0909cb7dba98.K562.5EU.0.unlabeled.II;16_chr1:44850000-3	chr1	+	44850778	44986602	135825	220M6700N111M1D16869N150M792N1I72M4122N194M1603N126M15615N90M29178N1M5D113M14766N162M36649N141M2558N2M2D161M3I3M5318N101M	1.08194	48.3377	109.495	0.919422	40.2996	99.16
3324a21c-0bc2-4629-8e30-d750edbb05e6.K562.5EU.0.unlabeled.III;16_chr1:44850000-1	chr1	+	44850778	44986599	135822	220M6700N108M2D2M16871N148M792N1I72M4122N194M1603N126M15615N90M29178N1M5D113M14766N162M36649N141M2558N2M2D161M3I3M5318N98M	0.405557	22.5668	110.52	0.359437	27.5138	30.275
7e8504b3-3f38-4832-a22b-53a98c1afe39.K562.5EU.60.labeled.IV;16_chr1:44856000	chr1	+	44856795	44986602	129808	1014M1D16869N150M792N1I72M4122N194M1603N126M15615N90M29178N1M5D113M14766N162M36649N141M2558N2M2D161M3I3M5318N101M	0.0182322	271.042	NA	0.0924196	30.6383	126.08
bc31557f-10cd-4598-a7ba-d3a4d97e39a1.K562.5EU.60.labeled.IV;16_chr1:44874000	chr1	+	44874529	44986602	112074	300M792N1I72M4122N194M1603N126M15615N90M29178N1M5D113M14766N162M36649N141M2558N2M2D161M3I3M5318N101M	0.646937	30.6383	77.6175	0.310174	36.6657	134.31
e989df53-7500-4ca0-9421-997e53d342f1.K562.5EU.60.labeled.IV;16_chr1:44926000	chr1	+	44926541	44986602	60062	199M14766N162M36649N141M2558N2M2D161M3I3M5318N101M	0.0191788	160.698	47.155	NA	NA	NA
8a6643d1-20dc-4f18-8843-8b222b5daecb.K562.5EU.0.unlabeled.II;0_chr1:44986000-2	chr1	+	44986750	44992132	5383	128M2802N92M123N196M1720N98M107N117M	0.0231049	62.6087	NA	NA	NA	NA
d07e47cc-bd4d-4860-a7a7-7dd6f2753c3f.K562.5EU.60.labeled.VI;0_chr1:44986000	chr1	+	44986821	44989141	2321	57M1737N527M	NA	NA	NA	NA	NA	NA
dcc981b5-10a5-4b4b-adc9-bcde979e7767.K562.5EU.60.labeled.III;0_chr1:44986000	chr1	+	44986821	44993643	6823	2951M123N196M1720N1833M	0.0851376	86.2938	184.298	0.0462098	62.6087	354.27
2d8d7171-f100-4475-a552-bf5a7b4c6979.K562.5EU.60.labeled.IV;16_chr1:44999000	chr1	+	44999587	45007926	8340	3992M92N266M123N75M1D2M112N2769M5D3M198N45M141N516M	0.714098	38.8778	33.785	0.384514	38.8778	163.03
d0179ed7-5355-4b18-a4fa-dbdcf90d9ab0.K562.5EU.60.labeled.heat.II;0_NR_036510-1	chr1	+	45012162	45015579	3418	124M621N113M116N219M239N198M117N162M368N138M159N101M103N67M330N243M	4.47596	30.5215	60.9475	5.51796	21.2881	88.33
58ca8b1f-1014-4bd8-9cec-66dc1b2df372.K562.5EU.60.labeled.IV;0_NR_036510	chr1	+	45012245	45015579	3335	41M621N113M272N63M239N198M117N162M368N138M159N101M103N67M330N243M	0.238353	79.7997	89.89	0.530402	33.4293	78.19
a007f7d9-64f3-4ef2-a7ad-298cd9e7f6f1.K562.5EU.60.labeled.heat.I;0_NR_036510	chr1	+	45012245	45015579	3335	41M621N113M116N219M220N217M117N162M368N138M159N101M103N67M333N240M	0.392332	43.6881	51.665	0.369678	30.6383	110.98
0047c196-8145-4187-b873-ffc593841891.K562.5EU.60.labeled.V;0_NR_036510	chr1	+	45012245	45015579	3335	775M116N2444M	0.381788	46.8654	112.19	0.0176675	467.806	214.03
75a4f95a-c00a-41de-9131-6fb66bd2f6ef.K562.5EU.0.unlabeled.II;0_NR_036510	chr1	+	45012245	45015579	3335	41M621N113M116N219M220N1262M103N640M	0.130777	43.6881	NA	0.0763576	46.8654	NA
f69c2295-4c3a-490c-8b7e-4a693c14a052.K562.5EU.60.labeled.IV;0_NM_000374	chr1	+	45012245	45015579	3335	41M621N2673M	0.111125	72.0459	161.65	0.238202	32.7368	205.195
b5e193b4-d6aa-4de4-984d-743125d64fb1.K562.5EU.1440.labeled.I;0_NR_036510	chr1	+	45012245	45015579	3335	41M571N163M116N219M239N198M117N162M368N138M159N101M103N67M330N243M	2.30102	34.2319	83.1825	2.76789	25.4857	88.5
25d61a77-c355-4e21-afb2-2e15261d24bf.K562.5EU.60.labeled.IV;0_NR_036510	chr1	+	45012258	45015552	3295	28M621N113M116N219M220N496M368N138M159N101M500N216M	NA	NA	NA	NA	NA	NA
7b52dd16-8b44-4728-a11d-da00c13d8244.K562.5EU.0.unlabeled.I;0_NR_036510	chr1	+	45012258	45015552	3295	28M571N163M116N219M220N217M117N162M368N138M159N101M103N67M330N216M	0.0988514	50.8162	10.43	NA	NA	NA
1aa61de1-d035-4647-b681-3d80df1551d5.K562.5EU.60.labeled.VI;0_NR_036510	chr1	+	45012296	45015552	3257	724M116N219M220N1262M500N216M	NA	NA	NA	NA	NA	NA
4ffda6a2-4568-4950-9dd8-8853696d2f6a.K562.5EU.60.labeled.heat.V;0_NR_036510	chr1	+	45012823	45015552	2730	197M116N219M220N217M117N162M368N138M159N101M103N613M	NA	NA	NA	NA	NA	NA
a964cf72-25e5-4e9d-8070-602f15f24c7e.K562.5EU.60.labeled.V;0_NR_036510-1	chr1	+	45012856	45015552	2697	164M272N63M239N198M117N162M368N138M159N101M103N67M330N216M	NA	NA	NA	0.0231049	62.6087	NA
21d4e984-3b30-4650-ab9d-4a2f38b5b4d8.K562.5EU.60.labeled.V;0_NR_036510	chr1	+	45012856	45015579	2724	164M116N1441M159N844M	0.0693147	62.6087	-1	0.0462098	62.6087	NA
48b9834e-b310-40ed-8fce-cf8df529898a.K562.5EU.0.unlabeled.I;0_NR_036510	chr1	+	45012856	45015579	2724	164M116N219M239N198M117N162M368N138M159N101M103N67M333N240M	0.341723	65.7513	43.03	0.753177	31.9851	105.95
22168704-58da-47c6-9659-5081c7721686.K562.5EU.60.labeled.V;0_NR_036510	chr1	+	45012856	45015579	2724	164M116N219M220N217M117N162M368N138M159N101M500N243M	NA	NA	NA	NA	NA	NA
f23db77a-4333-4542-928d-d88503c590eb.K562.5EU.60.labeled.heat.I;0_NR_036510	chr1	+	45012949	45015579	2631	71M116N219M220N1002M159N101M103N67M330N243M	0.468544	44.219	-0.5	0.0767152	160.698	137.365
7c0e8227-4fb1-4c8a-b77b-c144032176b9.K562.5EU.60.labeled.VI;0_NR_036510	chr1	+	45012949	45015579	2631	71M116N219M220N217M117N162M368N138M159N101M103N54M343N243M	0.109861	38.8778	121.545	NA	NA	NA
c812af90-3fff-4124-9b15-d3ae1b882030.K562.5EU.60.labeled.heat.IV;0_NR_036510	chr1	+	45012949	45015552	2604	71M116N219M220N217M117N162M665N101M103N67M330N216M	NA	NA	NA	NA	NA	NA
b4c6cb28-e34c-4295-b1e4-5b66625dd2fa.K562.5EU.0.unlabeled.III;0_NR_036510	chr1	+	45012949	45015579	2631	71M272N63M239N190M125N162M368N138M159N101M103N67M330N243M	0.329584	38.8778	89.74	0.130577	78.3609	NA
b3928bc3-b7ce-4405-9154-905b214258b6.K562.5EU.60.labeled.III;0_NR_036510	chr1	+	45012980	45015579	2600	40M272N63M220N217M117N162M368N138M159N101M103N67M330N243M	0.50228	29.5753	30.4525	0.372754	50.0275	81.97
68f56ff4-3db2-4465-bfb8-ca5ce27c756f.K562.5EU.60.labeled.IV;0_NR_036510	chr1	+	45012980	45015579	2600	40M272N63M239N198M117N162M368N138M159N101M103N67M333N240M	0.199279	73.0968	49.77	0.0999183	120.264	78.11
bd453475-d673-490f-9849-cc7a30516441.K562.5EU.60.labeled.heat.IV;0_NR_036510	chr1	+	45013747	45015579	1833	50M112N162M368N138M159N101M103N67M330N243M	0.130577	78.3609	75.9575	0.277259	20.2817	58.315
b6db441c-6047-425d-9a6b-7781b35b8192.K562.5EU.0.unlabeled.I;16_chr1:45204000	chr1	+	45204333	45206564	2232	2232M	NA	NA	NA	NA	NA	NA
9ee33197-3227-4964-bc02-9dfe9da23f25.K562.5EU.60.labeled.heat.III;16_chr1:45329000	chr1	+	45329243	45339947	10705	196M1D1077N40M622N2D152M85N136M103N1M1D181M170N2M1I4M1D1M3D64M75N4D148M82N2I90M85N117M75N76M83N39M134N1M3D77M114N38M1D87N147M822N7D121M5387N50M	0.0652885	78.3609	65.07	0.157152	69.3462	121.65
04913203-8b50-4665-baa8-261e900149f4.K562.5EU.0.unlabeled.I;16_chr1:45329000	chr1	+	45329243	45340011	10769	196M1D1077N40M622N2D152M85N1901M1064N3M2D123M5464N37M	0.167524	55.8758	55.705	0.0763576	46.8654	NA
b3e4f434-088c-484e-9f0e-727b611c4b45.K562.5EU.60.labeled.heat.II;16_chr1:45329000	chr1	+	45329243	45338265	9023	196M1D1077N40M622N2D152M85N136M103N1M1D181M170N2M1I4M1D1M3D64M75N4D148M82N2I90M85N117M75N76M83N39M134N1M3D77M114N38M1D87N147M822N7D121M3672N2D81M	0.109861	38.8778	NA	0.130777	43.6881	115.88
NM_025077_025077-1	chr1	+	45340053	45343944	3892	252M768N143M87N41M129N97M379N159M276N260M199N160M79N863M	0.0462098	62.6087	38.98	0.0549306	38.8778	NA
NM_025077_025077-2	chr1	+	45340186	45343978	3793	119M768N143M87N41M129N97M379N159M276N260M199N160M79N897M	0.120172	118.619	123.475	0.081093	110.437	2.34
d6c1cc7a-7c0f-4b98-bc89-62aa5f68fb70.K562.5EU.0.unlabeled.I;0_NM_025077	chr1	+	45340204	45343978	3775	119M750N143M87N41M129N97M379N159M276N260M199N160M79N897M	0.107799	81.5283	56.105	0.0191788	160.698	NA
9df03901-6891-48f8-858b-a4fd331aa776.K562.5EU.60.labeled.II;0_chr1:45343000	chr1	+	45343883	45344960	1078	1078M	0.0425688	86.2938	26.515	0.0191788	160.698	NA
915f55db-bfc5-4101-96c6-325daa6e7e97.K562.5EU.60.labeled.heat.IV;16_chr1:45493000	chr1	+	45493864	45500002	6139	1303M251N126M1006N1M4D68M675N86M1961N99M88N471M	0.138629	62.6087	NA	NA	NA	NA
NM_015506_015506-2	chr1	+	45500335	45510147	9813	79M6942N195M661N153M431N1352M	0.0392551	135.208	35.5875	0.088168	74.4112	127.83
57783da5-b5f0-439b-b9ef-7d26240890fc.K562.5EU.60.labeled.heat.I;16_chr1:45511000-1	chr1	+	45511052	45521829	10778	363M3092N130M235N115M659N7M1I154M3130N118M2580N195M	0.459711	40.2996	20.73	0.554518	30.6383	128.92
7b3942d3-19ea-4253-950f-43f260606ee9.K562.5EU.60.labeled.IV;16_chr1:45511000-1	chr1	+	45511052	45521919	10868	363M3092N130M235N115M659N7M1I154M3130N112M2783N2I88M	0.912229	29.4647	84.81	0.831777	20.2817	90.62
8785b063-a9f6-43a6-8acf-f2a1a179180f.K562.5EU.1440.labeled.II;16_chr1:45511000	chr1	+	45511052	45521871	10820	363M3092N130M235N115M659N7M1I154M3130N119M1D2M2773N40M	1.77316	38.1196	99.1625	1.2985	38.3618	91.02
d0ad607b-ddeb-4517-bd71-ce19afdd7f37.K562.5EU.60.labeled.I;16_chr1:45511000	chr1	+	45511052	45521871	10820	198M76N7D82M3092N130M235N115M659N7M1I154M3130N119M1D2M2773N40M	NA	NA	NA	NA	NA	NA
8785b063-a9f6-43a6-8acf-f2a1a179180f.K562.5EU.1440.labeled.II;16_chr1:45511000-1	chr1	+	45511052	45521919	10868	363M3092N130M235N115M659N7M1I154M3130N119M1D2M2773N88M	13.151	37.643	101.177	11.5945	30.2756	87.2
464cea96-0dd9-4870-9a6a-0b0da56d637b.K562.5EU.60.labeled.IV;16_chr1:45511000	chr1	+	45511052	45521871	10820	363M3092N130M235N115M659N7M1I154M3130N118M2554N263M	1.10083	43.4604	77.79	1.0608	33.4293	87.425
747603e7-4a38-459c-85fc-730d9ca9ab9c.K562.5EU.60.labeled.heat.V;16_chr1:45511000	chr1	+	45511052	45521871	10820	363M3092N480M659N7M1I154M3130N119M1D2M2773N40M	1.09691	29.6668	92.5725	0.607467	31.4818	95.08
1a75924e-a776-41cf-979f-7bdbcf97d5ba.K562.5EU.60.labeled.heat.I;16_chr1:45511000	chr1	+	45511052	45521871	10820	363M3092N130M235N28M1I3M4043N103M2783N2I40M	NA	NA	18.88	0.130777	43.6881	50.515
f0026bc7-b57e-44b6-a5cf-43c35252c644.K562.5EU.60.labeled.heat.I;16_chr1:45511000	chr1	+	45511052	45521871	10820	363M3092N130M235N935M3130N119M1D2M2773N40M	0.845501	31.8415	97.5475	0.584988	27.7782	172.58
7b3942d3-19ea-4253-950f-43f260606ee9.K562.5EU.60.labeled.IV;16_chr1:45511000	chr1	+	45511052	45521871	10820	363M3092N130M235N115M659N7M1I154M3130N112M2783N2I40M	0.350187	49.1253	60.53	0.646937	30.6383	75.81
6297d568-3359-4aa5-bc31-83e7fe9c65b2.K562.5EU.60.labeled.V;16_chr1:45511000	chr1	+	45511052	45521871	10820	363M3458N114M659N7M1I154M3130N119M1D2M2773N40M	0.0462098	62.6087	NA	0.13412	26.3128	NA
4e535526-9dd6-4196-b62d-c37c811d9ef0.K562.5EU.1440.labeled.II;16_chr1:45511000-1	chr1	+	45511052	45521910	10859	363M3092N130M235N115M659N7M1I154M3166N83M1D2M2773N79M	0.555739	16.3989	18.1	0.277259	30.6383	71.145
1ccb29ce-d080-468c-a15a-9404ee0313f5.K562.5EU.60.labeled.heat.IV;16_chr1:45511000-3	chr1	+	45511052	45519055	8004	363M3092N130M235N115M659N7M1I154M3130N119M13S	0.501651	42.6806	84.985	0.543255	28.6282	87.58
5adfd800-bbe4-4d3a-97c5-f6663cc4c47d.K562.5EU.0.unlabeled.II;16_chr1:45511000	chr1	+	45511052	45521919	10868	363M3092N130M235N114M1D3936N3M2D6M3D119M1D2M2773N88M	0.152715	46.8654	63.89	0.359437	27.5138	50.57
57783da5-b5f0-439b-b9ef-7d26240890fc.K562.5EU.60.labeled.heat.I;16_chr1:45511000	chr1	+	45511052	45521871	10820	363M3092N130M235N115M659N7M1I154M3130N118M2580N237M	1.24084	34.9011	58.1625	0.687107	42.5836	97.695
1ccb29ce-d080-468c-a15a-9404ee0313f5.K562.5EU.60.labeled.heat.IV;16_chr1:45511000-2	chr1	+	45511052	45521919	10868	363M3092N130M235N115M659N7M1I154M3130N118M2803N62M	0.459711	40.2996	46.635	0.346736	34.8054	75.43
c7bca523-31eb-4fe0-8faa-1bc9f714df7d.K562.5EU.60.labeled.heat.I;16_chr1:45511000	chr1	+	45511052	45521871	10820	363M3092N130M235N115M659N7M1I154M3130N118M2331N486M	0.425688	41.8917	50.015	0.556381	42.3201	142.885
464cea96-0dd9-4870-9a6a-0b0da56d637b.K562.5EU.60.labeled.IV;16_chr1:45511000-1	chr1	+	45511052	45521672	10621	363M3092N130M235N115M659N7M1I154M3130N118M2554N64M	0.502805	48.448	76.57	0.240245	41.5581	123.54
754dbde3-2d7a-4d5e-9bc8-183aacc73eaa.K562.5EU.60.labeled.heat.I;16_chr1:45511000-1	chr1	+	45511052	45522879	11828	363M3092N130M235N115M659N7M1I154M3130N118M3723N102M	0.584558	37.7216	89.0175	0.622463	33.0339	59.85
5befd293-2af2-4afc-9d6e-e451eab291a9.K562.5EU.1440.labeled.III;16_chr1:45511000	chr1	+	45511052	45521871	10820	363M3092N130M235N115M659N7M1I154M3130N118M2584N233M	1.36304	29.0522	69.455	0.426488	48.7269	76.575
7b3942d3-19ea-4253-950f-43f260606ee9.K562.5EU.60.labeled.IV;16_chr1:45511000-2	chr1	+	45511095	45521871	10777	320M3092N130M235N115M659N7M1I154M3130N112M2783N2I40M	NA	NA	40.595	0.109861	38.8778	53.89
8785b063-a9f6-43a6-8acf-f2a1a179180f.K562.5EU.1440.labeled.II;16_chr1:45511000-3	chr1	+	45511095	45521919	10825	320M3092N130M235N115M659N7M1I154M3130N119M1D2M2773N88M	3.70987	30.9178	90.5275	3.19266	27.6596	85.05
8785b063-a9f6-43a6-8acf-f2a1a179180f.K562.5EU.1440.labeled.II;16_chr1:45511000-2	chr1	+	45511095	45521871	10777	320M3092N130M235N115M659N7M1I154M3130N119M1D2M2773N40M	0.699881	40.7358	77.5075	0.316201	42.8907	64.62
5aa72022-4221-4beb-a524-d3bdd05b068d.K562.5EU.60.labeled.heat.V;16_chr1:45511000	chr1	+	45511095	45521756	10662	3542M235N115M659N7M1I154M3130N111M2313N2I396M	0.164792	38.8778	NA	0.081093	110.437	77.165
a489c456-ee5d-4c0e-8d5f-a90fc4dbbf22.K562.5EU.60.labeled.IV;0_NM_006066	chr1	+	45550821	45570047	19227	56M89N190M1280N128M9225N90M4690N120M180N152M961N196M749N73M143N87M661N157M	0.0425688	86.2938	44.135	0.109861	38.8778	NA
NM_001202413_006066	chr1	+	45550821	45570047	19227	56M89N190M10633N90M4690N120M180N152M961N196M307N200M242N73M143N87M661N157M	0.480489	41.5581	59.2625	0.30582	58.9839	104.85
NM_001202414_006066-1	chr1	+	45550821	45570047	19227	56M89N190M1280N128M9225N90M4690N120M180N152M961N196M307N200M242N73M143N87M661N157M	0.349941	40.7358	74.61	0.494257	50.8162	109.78
7101b1c3-c040-458a-87b4-9f82bc5d01a3.K562.5EU.60.labeled.heat.V;0_NM_006066-1	chr1	+	45550821	45570047	19227	56M89N190M10633N90M4690N120M180N152M961N196M749N73M143N87M661N157M	NA	NA	NA	NA	NA	NA
NM_006066_006066	chr1	+	45550858	45570047	19190	298M1280N128M9225N90M4690N120M180N152M961N196M307N200M242N73M143N87M661N157M	0.252933	90.2796	73.7225	0.250669	94.2796	133.83
NM_153326_006066	chr1	+	45550858	45570047	19190	298M10633N90M4690N120M180N152M961N196M307N200M242N73M143N87M661N157M	0.351982	59.4672	43.645	0.381788	46.8654	93.06
4d59d22d-9668-4bac-9c49-2a5c54f6c467.K562.5EU.60.labeled.IV;0_NM_006066	chr1	+	45550858	45570047	19190	23M85N190M1280N128M9225N90M4690N120M180N1309M307N200M242N73M143N87M661N157M	0.190301	88.9495	61.1825	0.157152	69.3462	121.565
73738328-4507-4ff2-89d3-ad0e041f3308.K562.5EU.0.unlabeled.II;0_NM_006066-1	chr1	+	45550858	45570047	19190	298M10633N90M4690N120M180N152M961N196M749N73M143N87M661N157M	NA	NA	57.335	0.109861	38.8778	NA
2ff74d14-30ba-4aff-a3be-98d4860b6fee.K562.5EU.1440.labeled.II;0_NM_006066	chr1	+	45550858	45570047	19190	298M1280N168M9185N90M6103N196M749N80M136N905M	NA	NA	NA	NA	NA	NA
6417f711-ef08-40bc-9c8f-ff8a10999e5f.K562.5EU.60.labeled.IV;0_NM_006066	chr1	+	45551078	45570047	18970	78M10633N90M6103N196M307N200M242N73M143N87M661N157M	0.0652885	78.3609	NA	NA	NA	NA
17e68490-1773-481c-a885-4f0a466a8959.K562.5EU.0.unlabeled.II;0_NM_006066	chr1	+	45551091	45572854	21764	65M1280N128M16363N73M143N87M661N2964M	0.13412	26.3128	83.7225	0.0924196	62.6087	122.4
3d9946aa-5dfc-4648-a370-185a6a12e1ef.K562.5EU.0.unlabeled.II;16_chr1:45578000	chr1	+	45578438	45583243	4806	4806M	0.0202733	110.437	54.075	NA	NA	NA
NM_002482_001195193	chr1	+	45584055	45618895	34841	151M7017N48M10984N111M2570N81M1465N110M729N1017M4831N80M847N86M111N74M646N189M103N167M865N57M232N78M759N129M469N835M	0.862325	73.5011	106.353	0.754208	48.448	142.1
dc5a43a1-b176-4cdd-aecc-1f03a108d939.K562.5EU.60.labeled.III;0_NM_001195193	chr1	+	45584055	45618247	34193	151M7017N48M10984N111M2570N81M1465N110M6577N80M847N86M111N74M646N189M103N167M865N57M232N78M1357N187M	NA	NA	NA	NA	NA	NA
e84f7ee5-4f7a-4596-a152-c6fdbc52e098.K562.5EU.60.labeled.IV;0_NM_001195193	chr1	+	45584055	45618247	34193	151M7017N48M13665N81M1465N110M6577N80M847N86M111N74M646N189M103N167M865N57M232N78M759N129M469N187M	0.145519	96.572	92.3275	0.088168	74.4112	61.38
cc0fbfff-77e0-4c80-86b7-f055cb0225c2.K562.5EU.60.labeled.II;0_NM_001195193	chr1	+	45584055	45618247	34193	151M7017N48M9114N73M1797N111M2570N81M1465N110M6577N80M847N86M111N74M646N189M103N167M865N57M232N78M759N129M469N187M	0.486558	53.1793	129.22	0.125334	94.2796	116.35
beb2ef23-80fc-470a-9b2c-4e02cf506dfa.K562.5EU.60.labeled.IV;0_NM_001195193	chr1	+	45584055	45618247	34193	151M7017N48M10984N111M2570N81M8152N80M847N86M111N74M646N189M103N167M865N367M759N785M	0.480489	41.5581	NA	0.0924196	62.6087	199.22
2ca588ef-9aae-487f-ab52-a0888aec9e4a.K562.5EU.0.unlabeled.II;0_NM_001195193	chr1	+	45584055	45618247	34193	151M7017N48M10984N111M2570N81M1465N6767M847N86M111N74M646N189M103N167M865N57M232N78M759N129M469N187M	0.813908	61.2623	88.43	0.46743	60.2526	137.83
NM_152298_001195193-3	chr1	+	45584055	45618247	34193	151M7017N48M10984N111M2570N81M1465N110M6577N80M847N86M111N74M646N189M103N167M865N57M232N78M759N129M469N187M	0.633119	47.4989	92.2725	0.173072	80.3397	155.965
bf74fa0f-e669-469f-825a-4eda74d5ff8b.K562.5EU.60.labeled.V;0_NM_001195193	chr1	+	45584055	45618247	34193	151M7017N48M10984N111M2570N81M1465N110M6577N80M847N86M111N74M646N189M103N167M865N57M1069N129M469N187M	0.0924196	30.6383	8.0125	0.0231049	62.6087	NA
9004a8b9-115a-4eef-91a5-d7b882f1ee5c.K562.5EU.60.labeled.IV;0_NM_001195193-1	chr1	+	45616660	45618886	2227	44M759N1424M	0.13412	26.3128	72.1325	0.0924196	30.6383	NA
38371d8d-a154-4b55-aaf8-7127bd488e49.K562.5EU.0.unlabeled.I;16_chr1:45620000	chr1	+	45620044	45620594	551	551M	NA	NA	NA	NA	NA	NA
f4b73ad4-79d4-4dec-8d61-aa8e60918c47.K562.5EU.1440.labeled.II;16_chr1:45627000	chr1	+	45627317	45686510	59194	1097M2073N120M9603N195M1D2022N72M12043N289M6D354N208M3625N2D116M27269N99M	NA	NA	86.385	0.0549306	38.8778	86.67
1072eccd-df58-442a-9ffd-d4c0a1bb9ccf.K562.5EU.1440.labeled.I;16_chr1:45627000	chr1	+	45627317	45630459	3143	1093M2D2M1165N881M	NA	NA	NA	NA	NA	152.1
417f6b0c-8d77-4272-9f76-be06a265e36f.K562.5EU.60.labeled.heat.III;16_chr1:45627000-1	chr1	+	45627317	45686523	59207	1093M2D2M1165N103M803N122M2882N159M448N141M5973N195M1D2022N72M12043N289M6D354N124M3709N1I118M1041N1043M1D25185N111M	0.170275	86.2938	141.94	0.0767152	160.698	190.875
2586748a-c0b0-408c-9d17-18c0609f9202.K562.5EU.60.labeled.heat.III;16_chr1:45627000-3	chr1	+	45627317	45688062	60746	1093M2D2M1165N103M803N122M2882N159M448N141M5973N195M1D2022N72M12043N289M6D354N124M3709N1I118M1041N1043M1D26756N79M	0.0172482	1036.82	131.562	0.105193	91.0784	82.205
2586748a-c0b0-408c-9d17-18c0609f9202.K562.5EU.60.labeled.heat.III;16_chr1:45627000-2	chr1	+	45627317	45688088	60772	1093M2D2M1165N103M803N122M2882N159M448N141M5973N195M1D2022N72M12043N289M6D354N124M3709N1I118M1041N1043M1D26756N105M	0.0172103	1166.35	125.92	0.152715	46.8654	148.305
d309a784-c37f-4329-8e06-cee44662b597.K562.5EU.0.unlabeled.II;16_chr1:45627000	chr1	+	45627494	45687056	59563	916M2D2M1165N103M803N122M2882N157M450N141M5973N195M1D2022N72M12043N289M6D354N124M3709N1I118M1041N1044M25767N62M	0.167524	55.8758	128.66	0.0392551	135.208	174
59b0a49e-a22e-4554-a228-329dd62c779e.K562.5EU.60.labeled.heat.I;16_chr1:45627000	chr1	+	45627494	45687056	59563	916M2D2M1165N103M803N122M2882N159M448N141M5973N195M1D2022N72M12043N289M6D354N3570M263N1M2D115M1041N1044M25767N62M	0.0185953	214.086	NA	0.0182322	271.042	196.04
d557be9d-9ac3-4740-a356-d487f5434dbf.K562.5EU.60.labeled.I;16_chr1:45627000	chr1	+	45627494	45686523	59030	916M2D2M1165N103M803N122M2882N159M448N141M5973N195M1D2022N72M12043N289M6D354N124M3709N1I118M1041N1044M24350N43M791N112M	0.105193	91.0784	71.125	0.111125	72.0459	169.63
6c36680b-6235-4181-82f3-96a57eade4c3.K562.5EU.0.unlabeled.I;16_chr1:45627000-1	chr1	+	45627494	45687085	59592	916M2D2M1165N103M803N122M2882N159M448N141M5973N195M1D2022N72M12043N289M6D354N124M3709N1I118M1041N1044M25767N91M	0.088168	74.4112	91.2425	0.146156	33.9811	NA
NM_016486_016486	chr1	+	45688209	45694435	6227	67M2698N137M2093N1232M	0.159936	412.601	93.38	0.105559	517.801	103.15
b6795712-08dc-4c2c-ade2-cdf0ce396fc4.K562.5EU.60.labeled.IV;0_NM_016486	chr1	+	45688209	45694435	6227	73M2692N137M2093N1232M	0.0345837	919.561	59.115	0.0357752	364.113	101.54
a1a39aab-8fd3-4b15-b48f-acc6e9255506.K562.5EU.60.labeled.I;0_chr1:45688000	chr1	+	45688209	45694435	6227	67M4928N1232M	0.0550109	251.634	110.565	0.0367896	242.092	405.1
cac5c154-696b-499f-9a0c-2566d98ee46d.K562.5EU.0.unlabeled.II;0_NM_016486	chr1	+	45688209	45694148	5940	67M2698N3175M	0.0748564	200.421	132.28	0.0178042	397.408	93.65
d0a6a939-0cc4-4bf4-bfd5-7509f7b1b497.K562.5EU.60.labeled.I;16_chr1:45697000	chr1	+	45697058	45750649	53592	3135M1D14054N221M4D2424N122M1D2184N139M2D8288N156M1814N7M1D157M11129N1M2D435M6D4781N328M4140N2M1I4M4I54M	0.213569	57.3726	91.8325	0.109861	38.8778	NA
5e317f17-dab8-4d55-b29b-dc8a72b9f5e1.K562.5EU.0.unlabeled.II;16_chr1:45727000-2	chr1	+	45727603	45750649	23047	186M1814N7M1D157M11129N1M2D435M6D4781N339M4135N54M	NA	NA	NA	NA	NA	NA
NM_001319245_015112	chr1	+	45803608	46036125	232518	465M20360N148M4858N143M52782N32M76990N92M38246N76M5005N79M3357N155M1900N76M2358N210M8656N102M2252N133M827N62M261N86M453N209M1696N139M1915N133M904N166M532N102M263N123M175N110M368N155M245N284M100N195M592N227M191N123M1083N137M137N191M271N1588M	0.255375	36.1713	146.822	0.107799	81.5283	185.5
9c1cf7ec-e7e4-4ef8-b77e-83a818815609.K562.5EU.60.labeled.VI;0_NM_015112	chr1	+	45803608	46036125	232518	465M20360N148M4858N143M52782N32M76990N92M38246N76M3159N21M1825N79M3357N155M1900N76M2358N210M8656N102M2252N133M827N62M261N86M453N209M1696N139M1915N133M1602N102M263N123M175N110M368N155M245N284M100N195M592N227M191N123M1083N137M134N194M271N1588M	0.175094	49.1253	62.635	0.115525	62.6087	133.63
6ded50e1-e2d8-4cfb-8d80-2f06ee7c6a81.K562.5EU.60.labeled.heat.I;0_chr1:46024000	chr1	+	46024410	46024890	481	481M	NA	NA	NA	0.0462098	62.6087	100.65
9c1dd3ad-feed-4f1a-bbfc-2a613114282f.K562.5EU.60.labeled.heat.IV;16_chr1:46040000	chr1	+	46040145	46132615	92471	3726M2046N168M455N3D1M3D2M1D76M9169N176M2D1M5949N6D142M3982N129M5D1M726N179M1D10422N97M3025N3D110M51093N3D769M	0.0462098	62.6087	49.495	0.088168	74.4112	NA
170db160-f7f8-454b-8f0a-0a22f364d2ee.K562.5EU.60.labeled.V;0_chr1:46054000	chr1	+	46054712	46059207	4496	4496M	NA	NA	NA	NA	NA	NA
a9c59392-ac08-45e1-ae30-7a88cf49ab15.K562.5EU.60.labeled.IV;16_chr1:46188000	chr1	+	46188683	46189125	443	443M	0.0231049	62.6087	-0.5	0.0462098	62.6087	NA
cf200843-86e4-4d50-9b8a-94a25be2ad1a.K562.5EU.60.labeled.IV;16_chr1:46188000	chr1	+	46188687	46198425	9739	671M100N112M1D285N139M483N40M195N7D68M1I6M1314N116M80N4D126M79N2M2D74M309N57M210N1M5D40M89N86M175N72M214N4M1D72M1D1M347N127M151N97M192N119M849N109M85N3D2M2I1M1D68M6D647N119M1I1M123N2I114M3D2M2D1M612N163M464N90M	0.513619	60.4668	107.73	0.329756	75.2003	131.5
1ff88c7b-ca66-4e5a-85be-6bbb30376bfa.K562.5EU.60.labeled.heat.V;16_chr1:46188000	chr1	+	46188696	46198425	9730	285M2D1M1I4M476N106M1D285N139M483N40M195N7D68M1I6M1314N116M80N4D126M79N2M2D74M309N57M210N1M5D40M89N86M175N72M214N4M1D72M1D1M347N127M151N97M192N119M849N109M85N3D2M2I1M1D68M6D647N119M1I1M123N2I114M3D2M2D1M612N163M464N90M	NA	NA	NA	0.0231049	62.6087	NA
NM_003579_001142548-1	chr1	+	46247753	46278471	30719	656M103N87M1401N120M8566N61M1217N136M442N70M115N289M245N125M6073N151M3049N127M1680N75M131N131M552N111M158N124M390N79M321N180M3099N164M91N400M	0.316201	42.8907	122.91	0.161734	62.6087	128.19
0033d3e6-5ed9-465b-8561-a684a4ef2f18.K562.5EU.60.labeled.heat.I;0_NM_001142548	chr1	+	46247753	46278471	30719	656M103N87M1401N120M8566N2330M245N125M6073N151M3049N127M582N75M1023N75M131N131M552N111M158N124M390N79M321N180M3099N164M91N400M	0.312063	55.3575	132.16	0.190535	56.7178	141.95
6a347fb3-9c90-43b2-9cc6-6db46dfcd3f3.K562.5EU.60.labeled.II;0_NM_001142548	chr1	+	46248265	46278471	30207	144M103N87M1401N120M8566N61M2514N125M6073N151M3049N127M1680N75M131N131M552N111M158N124M390N79M321N180M3099N164M91N400M	0.0178042	397.408	135.4	0.0202733	110.437	-1
e0adc006-6dfa-4b82-91cc-c2e343efe454.K562.5EU.60.labeled.IV;0_NM_001142548	chr1	+	46272887	46278471	5585	1330M321N180M3099N164M91N400M	0.109861	38.8778	94.38	0.0231049	62.6087	NA
e7df943f-15e4-4b12-a1e6-ca61a7202eab.K562.5EU.0.unlabeled.III;0_chr1:46276000	chr1	+	46278402	46279087	686	686M	0.0608198	110.437	NA	0.0988514	50.8162	43.41
cbadf00c-801e-4cc2-a520-5b9202447637.K562.5EU.60.labeled.IV;16_chr1:46278000	chr1	+	46278408	46299620	21213	2975M3970N2M6D1139M11063N73M650N1335M	0.337778	44.423	93.0925	0.219722	38.8778	78.895
5e676901-8354-4e34-b3c0-b03c4279a5a0.K562.5EU.60.labeled.IV;16_chr1:46278000-1	chr1	+	46278408	46303279	24872	680M97N77M234N121M577N92M103N5M2D169M1D3M1D562N251M3970N2M6D1139M11063N73M650N85M4753N156M	0.218709	76.7798	29.15	0.584988	27.7782	125.45
5e676901-8354-4e34-b3c0-b03c4279a5a0.K562.5EU.60.labeled.IV;16_chr1:46278000-3	chr1	+	46278434	46303337	24904	654M97N77M234N121M577N92M103N5M2D169M1D3M1D562N251M3970N2M6D1139M11063N73M650N85M4753N214M	0.146156	33.9811	20.09	NA	NA	87.13
68c41d58-644b-47ae-befd-6fb8c356c04f.K562.5EU.60.labeled.heat.IV;16_chr1:46278000	chr1	+	46278434	46303337	24904	654M97N69M1863N3D3M1D259M3970N2M6D1139M11063N73M650N85M4753N214M	NA	NA	NA	NA	NA	NA
a804fe39-5715-4d75-9c83-824e44ea4d95.K562.5EU.0.unlabeled.II;16_chr1:46283000	chr1	+	46283980	46286070	2091	2091M	0.0231049	62.6087	39	NA	NA	NA
d72d4d25-6684-479a-b49c-9cb88f432c63.K562.5EU.60.labeled.IV;16_chr1:46284000-2	chr1	+	46284005	46303337	19333	2495M11063N73M650N85M4753N214M	0.0763576	46.8654	25.765	NA	NA	NA
08a70dab-b697-47fe-994b-bda60aa5ca56.K562.5EU.60.labeled.IV;0_NM_001297565-2	chr1	+	46303679	46316772	13094	142M5280N24M1030N162M6235N221M	3.24941	34.5115	64.595	2.56002	33.5245	101.995
NM_001297566_001297565-1	chr1	+	46303679	46316772	13094	142M6334N162M6235N221M	0.802649	35.392	38.805	0.739357	30.6383	116.52
683ee0f1-067c-4a3e-a658-0be939e3df3e.K562.5EU.60.labeled.III;0_NM_001297565	chr1	+	46303710	46316772	13063	111M5280N27M1027N166M6231N221M	0.401324	35.392	61.92	0.144551	54.7527	81.14
7f8b8647-21d4-44b3-8690-bceb8132e7af.K562.5EU.60.labeled.heat.I;0_NM_006004	chr1	+	46303710	46316772	13063	111M5283N24M1027N166M6231N221M	0.0988514	50.8162	NA	0.0549306	38.8778	53.65
7b2601b6-3506-40d0-8ea2-43e21ada58c5.K562.5EU.1440.labeled.II;0_NM_001297565	chr1	+	46303710	46316772	13063	111M5283N40M1011N162M6235N221M	0.236618	57.8963	71.9275	0.277259	20.2817	NA
08a70dab-b697-47fe-994b-bda60aa5ca56.K562.5EU.60.labeled.IV;0_NM_001297565	chr1	+	46303710	46316772	13063	111M5280N24M1030N162M6235N221M	0.238202	32.7368	47.52	0.200662	35.392	64.54
1479603a-36a9-45ce-b994-5a6a6abad5aa.K562.5EU.60.labeled.II;0_NM_001297565	chr1	+	46303710	46316772	13063	111M5283N21M1030N162M6235N221M	0.26824	26.3128	NA	0.18546	42.3201	118.62
f92b4844-131f-4ae1-b846-ada0051bf492.K562.5EU.60.labeled.heat.V;0_NM_001297565	chr1	+	46303710	46316772	13063	111M5280N27M773N144M110N162M6235N221M	0.18546	42.3201	NA	0.255375	36.1713	53
NM_006004_001297565-2	chr1	+	46303710	46316750	13041	111M5280N27M1027N162M6235N199M	1.15129	18.2912	70.655	0.908091	21.6944	NA
e74bb7df-3403-4afe-8d2e-cdd6defe6039.K562.5EU.1440.labeled.II;0_NM_001297565	chr1	+	46303710	46316772	13063	111M5280N27M7424N221M	NA	NA	NA	NA	NA	NA
482ef068-0a01-43bf-993a-64f8eea5f8bb.K562.5EU.60.labeled.heat.V;0_NM_001297565	chr1	+	46303710	46316772	13063	111M5283N24M769N148M110N162M6235N221M	0.530402	33.4293	61.67	0.761509	26.8895	128.76
NM_006004_001297565-3	chr1	+	46303710	46316772	13063	111M5280N27M1027N162M6235N221M	23.154	22.9006	82.415	23.6328	19.6215	82.46
0e531528-de34-4258-a69b-df163fad71f8.K562.5EU.60.labeled.IV;0_NM_001297565	chr1	+	46303710	46316772	13063	111M5280N43M1011N162M6235N221M	0.274653	38.8778	65.1275	0.164792	38.8778	121
b58cb97a-44dc-45dc-b26d-105de8f16e2f.K562.5EU.60.labeled.V;0_NM_001297565	chr1	+	46303710	46316772	13063	111M5283N24M1027N162M6235N221M	10.2725	24.5685	88.71	9.9007	20.5212	80.71
NM_001297565_001297565	chr1	+	46303710	46316772	13063	111M5280N27M769N148M110N162M6235N221M	1.02675	25.4191	124.942	1.68803	21.2509	85.955
b63d3dc5-e825-4185-9b8a-e9b422f4334b.K562.5EU.1440.labeled.II;0_NM_001297565	chr1	+	46303710	46316772	13063	111M290N70M4920N27M1027N162M6235N221M	1.02968	26.7411	72.38	1.05797	20.6006	50.91
b58cb97a-44dc-45dc-b26d-105de8f16e2f.K562.5EU.60.labeled.V;0_NM_001297565-1	chr1	+	46303710	46316750	13041	111M5283N24M1027N162M6235N199M	NA	NA	NA	0.454046	21.6944	NA
NM_006004_001297565	chr1	+	46303716	46316772	13057	105M5280N27M1027N162M6235N221M	4.16764	23.4952	74.1375	3.58352	23.5914	82.32
NM_006004_001297565-1	chr1	+	46303716	46316750	13035	105M5280N27M1027N162M6235N199M	0.49147	24.382	NA	0.109861	38.8778	39.11
0e531528-de34-4258-a69b-df163fad71f8.K562.5EU.60.labeled.IV;0_NM_001297565-2	chr1	+	46303716	46316772	13057	105M5280N43M1011N162M6235N221M	0.207027	44.8818	NA	0.277259	20.2817	81.445
b58cb97a-44dc-45dc-b26d-105de8f16e2f.K562.5EU.60.labeled.V;0_NM_001297565-2	chr1	+	46303716	46316772	13057	105M5283N24M1027N162M6235N221M	1.31833	38.8778	120.205	1.07628	36.3146	147.22
b58cb97a-44dc-45dc-b26d-105de8f16e2f.K562.5EU.60.labeled.V;0_NM_001297565-3	chr1	+	46303716	46316750	13035	105M5283N24M1027N162M6235N199M	NA	NA	NA	0.0549306	38.8778	NA
ea1110bb-815e-4bd3-a8ed-7c9991a93366.K562.5EU.1440.labeled.II;0_NM_001297565	chr1	+	46307095	46316772	9678	113M1893N27M1027N162M6235N221M	0.115525	62.6087	18.9325	0.109861	38.8778	65.04
765e1140-8467-4753-a317-935f466b1752.K562.5EU.60.labeled.heat.IV;0_NM_001297565-2	chr1	+	46308821	46316772	7952	1224M110N162M6235N221M	0.330439	32.1677	63.575	0.255375	36.1713	NA
0aaac53e-a41a-4bd5-8dad-334d1f7f70a7.K562.5EU.0.unlabeled.III;0_chr1:46312000	chr1	+	46316552	46316774	223	223M	0.125334	94.2796	-1	0.111125	72.0459	36.695
NR_045791_045789-1	chr1	+	46340189	46365030	24842	731M3881N162M7905N161M7675N125M741N3461M	0.323469	62.6087	113.605	0.107799	81.5283	NA
NM_199044_045789	chr1	+	46340730	46362192	21463	190M3881N344M1776N155M5792N161M7675N125M741N623M	0.261554	43.6881	66.3525	0.26824	26.3128	29.39
NM_199044_045789-1	chr1	+	46340824	46365030	24207	96M3881N344M1776N155M5792N161M7675N125M741N3461M	0.114349	169.366	130.303	0.15343	76.1027	129.18
ca4fbedd-d8fa-4da3-a743-dfa3a89fa94d.K562.5EU.60.labeled.heat.II;0_NM_001441	chr1	+	46409958	46413848	3891	1694M491N109M823N146M226N402M	NA	NA	NA	NA	NA	NA
e915170c-e69a-4a50-b589-b6846a5de919.K562.5EU.60.labeled.heat.V;0_chr1:46442000-1	chr1	+	46442883	46482486	39604	155M12782N91M26299N277M	0.184839	62.6087	101.64	0.200662	35.392	NA
ecdf52fc-fbb5-418c-afbc-9c909000efc6.K562.5EU.60.labeled.IV;0_chr1:46442000-2	chr1	+	46442910	46482486	39577	128M39172N277M	NA	NA	NA	0.0549306	38.8778	NA
3914da1f-bdd7-4341-a4c8-f9fdd6d9a462.K562.5EU.60.labeled.I;0_chr1:46512000	chr1	+	46513932	46516210	2279	2279M	0.105193	91.0784	148.915	0.0191788	160.698	NA
b126e747-8431-4024-b2f7-9aaacaa1bfae.K562.5EU.60.labeled.VI;16_chr1:46557000	chr1	+	46557410	46604246	46837	1390M2677N168M1D1M1005N192M1D1M2196N92M3306N58M3564N103M2779N76M1554N81M1D1M3874N99M4D2596N103M1D3M10782N160M9904N64M	0.0785102	135.208	56.705	0.134125	70.4707	113.36
8ab10764-4cf9-438d-8bc3-b28823d9cefd.K562.5EU.0.unlabeled.II;16_chr1:46557000	chr1	+	46557410	46604246	46837	1387M1428N1D1M3D2M1D45M1200N167M1D1M1005N192M1D1M2196N92M3306N58M3564N103M2779N76M1554N81M1D1M3874N99M4D2596N103M1D3M10782N160M9904N64M	0.207944	62.6087	92.485	0.125334	94.2796	167.545
a5b6a3ac-c6b0-460e-a9a0-7eee5f00080a.K562.5EU.0.unlabeled.III;16_chr1:46574000	chr1	+	46574834	46604246	29413	186M1554N81M1D1M3874N99M4D2596N103M1D3M10782N160M9946N22M	NA	NA	19.11	0.0202733	110.437	99.97
e0d027a3-c599-4f61-8c1f-5c48afe53b35.K562.5EU.1440.labeled.II;16_chr1:46580000	chr1	+	46580446	46604246	23801	184M4D2596N103M1D3M10782N160M9946N22M	0.0693147	62.6087	30.525	0.179176	23.5914	66.38
59ba4eba-f025-4c5c-b3cc-16b88b0ffb2f.K562.5EU.60.labeled.II;16_chr1:46580000	chr1	+	46580446	46604246	23801	184M4D2596N100M2539N5D102M2I3M8140N160M9904N64M	0.0202733	110.437	NA	NA	NA	NA
398ab212-26bc-42e9-a149-ef33f3bc3932.K562.5EU.60.labeled.heat.IV;16_chr1:46580000	chr1	+	46580446	46604246	23801	184M4D2596N103M1D3M10782N160M9904N64M	0.109861	38.8778	NA	0.0693147	62.6087	NA
9e70a401-b2d1-4260-9185-46c88b807759.K562.5EU.60.labeled.heat.I;16_chr1:46607000	chr1	+	46607719	46616787	9069	1968M318N1I199M2699N460M3336N8M3D78M	0.109861	38.8778	NA	0.0405465	110.437	197.18
9e70a401-b2d1-4260-9185-46c88b807759.K562.5EU.60.labeled.heat.I;16_chr1:46607000-1	chr1	+	46607974	46616828	8855	1713M318N1I199M2699N468M3339N119M	NA	NA	NA	0.0202733	110.437	NA
2383c562-1d14-4683-9a8b-8df9a67d9376.K562.5EU.60.labeled.VI;16_chr1:46632000-2	chr1	+	46632750	46668346	35597	3221M1D1M16609N49M1188N51M4259N59M491N4D2M2D49M6513N2M5D112M2D5M2690N282M	0.346263	107.566	42.54	0.444337	60.1286	144.32
ddaa5b28-829f-49a9-8ed4-b724f1fdd18c.K562.5EU.60.labeled.V;16_chr1:46632000	chr1	+	46632750	46668346	35597	1079M2068N75M4D2M7219N107M4D1M1855N93M1D1M7323N49M1188N51M4259N59M491N4D2M2D49M6513N2M5D112M2D5M2690N282M	0.12334	102.325	136.75	0.0652885	78.3609	84.16
6a9cd60d-43bd-4b84-8fd9-e43cf4d77a44.K562.5EU.60.labeled.heat.II;16_chr1:46675000	chr1	+	46675171	46719130	43960	3468M4663N120M5D1M1066N109M2181N87M1482N194M3D1039N104M1D2134N110M4613N98M11254N1M2D146M8243N148M1459N1229M	0.154221	154.254	119.17	0.135047	153.338	165.23
e8a922bf-1015-4a61-8a9c-e2ff2ccb5074.K562.5EU.60.labeled.heat.IV;16_chr1:46675000-2	chr1	+	46676799	46719130	42332	1840M4663N126M1065N110M2181N87M1482N194M3D1039N104M1D2134N110M4613N98M11254N1M2D146M8243N148M1459N1229M	0.134125	70.4707	89.4925	0.0425688	86.2938	NA
0b7f312b-c75a-45eb-8ed3-058d6cb30fa5.K562.5EU.60.labeled.heat.I;16_chr1:47216000	chr1	+	47216315	47229507	13193	3858M3825N4D99M5097N310M	0.180957	115.884	143.032	0.0939636	192.326	183.325
aea2eb8f-17a8-4662-af0d-eafd83f272d7.K562.5EU.60.labeled.IV;16_chr1:47228000	chr1	+	47228355	47231863	3509	170M673N157M1695N814M	NA	NA	NA	0.0549306	38.8778	NA
df022ad9-fa60-4f14-9f4f-f50d62fb09b5.K562.5EU.60.labeled.I;16_chr1:47230000	chr1	+	47230265	47230790	526	526M	NA	NA	-0.5	NA	NA	-1
d6d154e8-72f7-40a8-9980-b69becdeef8a.K562.5EU.60.labeled.I;16_chr1:47250000	chr1	+	47250139	47314135	63997	1784M8366N250M2363N212M6521N230M2209N170M7999N966M1130N1M5D105M5097N2M6I112M1774N150M3872N88M2220N84M4056N247M1408N191M485N117M2542N100M5279N84M3674N3M1I101M	0.234503	139.405	121.615	0.0550109	251.634	142.57
NM_016308_016308	chr1	+	47333817	47378836	45020	300M34352N147M4339N153M1801N77M211N97M1410N2133M	1.11509	71.1006	110.847	0.249324	160.698	127.655
4dd0e745-d2ac-432c-b1bc-0d1dbf9f3b3c.K562.5EU.0.unlabeled.III;0_NM_016308	chr1	+	47333817	47378836	45020	300M34352N147M4339N2339M1410N2133M	0.857176	93.8887	110.843	0.574884	73.5011	119.83
a5582338-94ed-4509-982c-7bc5dc47d14a.K562.5EU.60.labeled.I;0_chr1:47375000	chr1	+	47377449	47378838	1390	1390M	0.0717363	347.911	98.9	0.115073	160.698	124.53
2800e295-858e-4836-a3ef-6210add0997b.K562.5EU.60.labeled.IV;0_NM_004474	chr1	+	47437771	47440688	2918	2918M	0.0988514	50.8162	NA	0.0924196	30.6383	NA
78dfc1f7-3928-41c2-acf0-d8f9ff1945e8.K562.5EU.60.labeled.IV;16_chr1:50440000	chr1	+	50440935	50959876	518942	579M33936N2M1D2M3D221M14908N81M1055N78M43567N89M4134N137M27343N1M5D155M15386N82M1985N119M11311N2I102M1D2M4D2M59220N81M50257N109M3D2M1D1M32967N88M5729N93M1D43223N205M13425N46M56251N62M101768N6M1D112M	0.645014	40.8901	146.65	0.328899	59.2428	100.96
beb4d8dd-9f2d-4873-bf11-3dc745fa3183.K562.5EU.60.labeled.I;16_chr1:50439000-3	chr1	+	50441274	50960229	518956	240M33936N2M1D2M3D221M14908N81M1055N68M43569N7M1I1M1I89M4134N137M27343N1M5D155M15386N82M952N64M969N119M11311N2I102M1D2M4D2M59220N81M50257N109M3D2M1D1M32967N88M5729N93M1D43223N205M13425N46M56251N62M101768N6M1D465M	2.78574	31.0098	122.225	1.67918	34.6636	104.24
c0b985a9-e5a2-4cf2-a7e9-382f1c74709f.K562.5EU.60.labeled.heat.III;16_chr1:50441000	chr1	+	50441274	50960119	518846	245M50197N85M43567N81M4132N4M2D141M27343N1M5D155M15386N82M952N64M969N119M11311N2I102M1D2M4D2M59220N81M50257N109M3D2M1D1M32967N88M5729N93M1D43223N205M13425N46M56251N62M101768N6M1D355M	0.0549306	38.8778	NA	NA	NA	NA
99a71854-42f4-454b-a93e-a24345ee479a.K562.5EU.60.labeled.heat.IV;16_chr1:50967000	chr1	+	50967885	50970088	2204	2204M	NA	NA	NA	NA	NA	NA
NM_001262_078626-1	chr1	+	50968791	50974634	5844	1109M458N140M3395N742M	0.676539	33.5494	107.215	0.40482	40.4887	97.87
872e7e1a-183e-4bdc-99cb-f7c2dcfa2b8b.K562.5EU.1440.labeled.III;0_NM_001262	chr1	+	50968829	50973250	4422	1071M458N2893M	NA	NA	NA	0.0231049	62.6087	NA
NM_078626_078626	chr1	+	50970257	50974634	4378	241M3395N742M	0.12164	53.1793	70.2	0.852829	27.3302	119.85
57e74d7e-fd02-4de0-a5eb-c0e96ec749b1.K562.5EU.0.unlabeled.II;16_chr1:50975000	chr1	+	50975032	50976548	1517	1517M	NA	NA	NA	0.0231049	62.6087	NA
8eee9b62-9202-4869-8e2f-b5649ca42da0.K562.5EU.60.labeled.heat.III;0_chr1:51010000	chr1	+	51010664	51013456	2793	2793M	NA	NA	NA	NA	NA	NA
NM_014372_014372	chr1	+	51236310	51273255	36946	570M33076N170M1025N2105M	0.298459	123.563	118.54	0.192573	155.539	113.81
7e90b852-8288-4382-a32c-e6d4a25e3bff.K562.5EU.60.labeled.IV;16_chr1:51354000	chr1	+	51354406	51446851	92446	2441M4326N2I186M2510N154M1925N3M1I75M28351N68M4584N137M1752N35M1D2M1480N89M893N114M2367N5D205M2026N199M4D2M1198N158M12089N73M18488N87M4456N155M1658N150M	0.034354	1310.15	139.738	0.112037	204.951	227.61
ead8b425-cc69-4779-9ce3-420a571401b6.K562.5EU.60.labeled.IV;16_chr1:51354000	chr1	+	51354738	51519258	164521	2109M4326N2I186M2510N154M1925N3M1I75M28351N67M4588N134M1752N35M1D2M1480N89M893N114M2367N5D205M2026N199M4D2M1198N158M12089N73M18488N87M4456N155M1914N148M13985N58M2522N128M1462N66M3146N95M3121N49M1121N93M3I3M9I7M2I5M46226N1M4I65M	0.0361951	300.991	62.6775	0.167524	55.8758	87.925
a7523ee5-7a6d-4a1d-99ec-275d0d0f71fa.K562.5EU.60.labeled.IV;16_chr1:51354000	chr1	+	51354738	51519348	164611	2109M4326N2I186M2510N154M1925N3M1I75M28351N68M4584N137M1752N35M1D2M1480N89M893N114M2367N5D205M2026N199M4D2M1198N158M12089N73M18488N87M4456N155M1914N148M829N200M12955N59M2522N128M1462N66M3146N95M3121N49M1121N93M3I3M9I7M2I5M46226N1M4I155M	0.154221	154.254	120.507	0.137936	131.627	146.88
b8fb42ac-4178-459f-83b2-24c2642f08be.K562.5EU.60.labeled.heat.III;16_chr1:51354000	chr1	+	51355240	51519348	164109	1607M4326N2I186M2510N154M1925N3M1I75M28351N68M4584N137M1752N35M1D2M1480N89M893N114M2367N5D205M2026N199M4D2M1198N158M12089N73M18488N87M4456N155M1914N148M940N89M12955N59M2522N128M1462N66M3146N95M3121N49M1121N93M3I3M9I7M2I5M46226N1M4I155M	NA	NA	68.215	0.0828639	98.2946	172.16
5641f711-4690-47c7-b748-782d7bf7b1f7.K562.5EU.60.labeled.heat.III;16_chr1:51355000	chr1	+	51355350	51519262	163913	6009M2510N154M1925N3M1I75M28351N68M4584N137M3269N90M893N114M2367N5D205M2026N199M4D2M1198N158M12089N73M18488N87M4456N155M1914N148M940N89M12955N59M2522N128M1462N66M3146N95M3121N49M1121N93M3I3M9I7M2I5M46226N1M4I69M	NA	NA	46.78	0.0202733	110.437	121.085
eb69afab-aa8d-44c7-80ed-a20e13afd01d.K562.5EU.60.labeled.IV;16_chr1:51455000	chr1	+	51455979	51519262	63284	2753M2350N2M7D58M2522N128M1462N66M3146N95M3121N49M1121N93M3I3M9I7M2I5M46226N1M4I69M	NA	NA	NA	NA	NA	NA
7737e186-3b83-4daa-8a09-b9a8ecf624e7.K562.5EU.0.unlabeled.I;16_chr1:51468000	chr1	+	51468385	51519262	50878	183M3121N49M1121N93M3I3M9I7M2I5M46226N1M4I69M	NA	NA	NA	NA	NA	NA
e7379869-dfa3-40a5-8e16-dc66e5187ef3.K562.5EU.60.labeled.heat.III;0_chr1:51518000	chr1	+	51518229	51579287	61059	218M42435N142M12969N140M3626N80M1238N211M	0.0231049	62.6087	NA	0.0652885	78.3609	NA
d8dcc097-a43c-43f5-ad0d-d64cafe5ff45.K562.5EU.60.labeled.IV;0_chr1:51518000-2	chr1	+	51518262	51561636	43375	185M42435N142M447N166M	0.274653	38.8778	51.11	NA	NA	NA
e4326ef6-69bb-4966-bf54-4c8b3a3fcd10.K562.5EU.60.labeled.VI;0_chr1:51518000-1	chr1	+	51518294	51561636	43343	153M42438N139M447N166M	0.0924196	30.6383	11.5	NA	NA	NA
7c59f096-2e51-4624-bfe1-0f5e6d693882.K562.5EU.60.labeled.VI;0_NR_036662	chr1	+	51518294	51789218	270925	153M55546N140M42741N348M34769N51M17392N79M44490N77M31456N96M1078N48M1611N30M1746N51M6124N39M4350N72M1086N105M3850N160M6088N113M422N119M4109N86M4245N172M1223N85M1271N111M238N64M4D110N141M1225N79M639N92M735N136M226N1504M	0.15343	76.1027	NA	0.0583832	143.621	127.73
354e8ed6-413c-453d-b1c9-67bf88b4443e.K562.5EU.60.labeled.heat.IV;0_chr1:51518000	chr1	+	51518294	51579287	60994	153M42435N142M12969N140M3626N84M1234N211M	0.0549306	38.8778	NA	NA	NA	NA
5c930c31-bfa1-4240-8033-3871de9c2b41.K562.5EU.60.labeled.heat.IV;0_chr1:51518000	chr1	+	51518294	51579287	60994	153M55546N140M3626N80M1238N211M	NA	NA	NA	0.0202733	110.437	NA
eba97d4e-3585-4eca-be2d-3e4d2d9d5d68.K562.5EU.60.labeled.IV;0_NR_036662	chr1	+	51518294	51788412	270119	153M42435N142M12969N140M40172N115M2454N348M34769N51M17392N79M44490N77M31456N96M1078N48M1611N30M1746N51M6124N39M4331N91M1086N105M3850N160M6088N113M422N119M4109N86M4245N172M1223N85M1271N111M238N64M4D110N141M1225N79M639N92M735N136M226N698M	0.289101	54.7527	81.7625	0.0405465	110.437	48.215
73fb5c7e-465a-4b9d-b714-5f6ceb386ede.K562.5EU.60.labeled.heat.V;0_chr1:51518000	chr1	+	51518294	51561636	43343	190M42398N142M447N166M	0.0924196	30.6383	94.28	NA	NA	79.69
18ad4566-0c66-47b5-8fc5-c8497be12ce2.K562.5EU.60.labeled.II;0_chr1:51518000	chr1	+	51519260	51519702	443	443M	0.0425688	86.2938	41.5825	NA	NA	NA
d8d53985-b5b3-46d7-bd6a-7187d271fe4a.K562.5EU.60.labeled.I;0_chr1:51555000	chr1	+	51555547	51563256	7710	7710M	0.0924196	62.6087	117.72	0.0231049	62.6087	NA
NM_148908_036662-2	chr1	+	51617135	51788467	171333	87M34769N51M17392N79M44490N77M31456N96M1078N48M1611N30M1746N51M10494N91M1086N105M3850N160M6088N113M422N119M4109N86M4245N172M1223N85M1271N111M238N64M4D110N141M1225N79M639N92M735N136M226N753M	0.224647	106.004	118.39	0.0999183	120.264	156.17
1d878b7d-4641-413d-b44a-25358b54e582.K562.5EU.60.labeled.heat.V;0_NR_036662	chr1	+	51729830	51788467	58638	172M15534N96M1078N48M1611N30M1746N51M6124N39M4331N91M1086N105M3850N160M6088N113M422N119M4109N86M4245N172M1223N85M1271N111M238N64M4D110N141M1225N79M639N92M735N136M226N753M	0.0553705	232.654	128.355	0.0626672	94.2796	NA
NM_148907_036662	chr1	+	51729830	51788412	58583	172M15534N96M1078N48M1611N30M1746N51M10494N91M1086N105M3850N160M6088N113M422N119M4109N86M4245N172M1223N85M1271N111M238N64M4D110N141M1225N79M639N92M735N136M226N698M	0.0583832	143.621	88.9675	0.088168	74.4112	123.87
fa0c45b8-69b5-4cf4-9cfa-c89c3c03cbc5.K562.5EU.60.labeled.V;0_NR_036662	chr1	+	51729830	51788833	59004	295M15411N96M1078N48M1611N30M1103N87M556N51M6124N39M4331N91M1086N105M3850N160M6088N113M422N119M4109N86M4245N172M1223N85M1271N111M238N64M4D110N141M1225N79M639N92M735N136M226N1119M	0.297982	86.2938	107.105	0.161734	62.6087	148.92
91e56a71-6331-47cc-a694-828e1a983796.K562.5EU.60.labeled.VI;0_NR_036662-1	chr1	+	51729845	51788442	58598	280M15411N96M1078N48M1611N30M1746N51M6124N39M4331N91M1086N105M3850N160M6088N113M422N119M4109N86M4245N172M1223N85M1271N111M238N64M4D110N141M1225N79M639N92M735N136M226N728M	0.0986869	130.199	128.37	0.180197	68.5032	106.74
NM_148904_036662-3	chr1	+	51729845	51788442	58598	280M15411N96M1078N48M1611N30M1746N51M10494N91M1086N105M3850N160M6088N113M422N119M4109N86M4245N172M1223N85M1271N111M238N64M4D110N141M1225N79M639N92M735N136M226N728M	0.115874	152.117	120.272	0.0575364	160.698	90.45
b34bebef-f750-41f2-892d-cff2d67b4302.K562.5EU.60.labeled.I;16_chr1:51789000	chr1	+	51789196	51878715	89520	236M134N92M875N112M251N1I95M587N80M379N2D1M3D57M1D277N39M2041N1I3M6D4M1D139M212N31M3394N164M1D1M2143N123M3136N6I148M7D1M1538N52M1232N116M2400N3M1D90M879N122M3D1586N107M1931N5D55M461N55M83N1698M1676N71M1664N74M1624N54M2108N123M1496N1M3D2M1D98M1D2412N72M6144N1M3D154M1960N85M2D154N4139M37760N445M	0.22225	72.0459	144.435	0.318635	65.9758	196.255
8adf3ab0-6185-4f05-ab1d-b70e81411050.K562.5EU.0.unlabeled.II;16_chr1:51789000	chr1	+	51789196	51878662	89467	236M134N92M875N112M251N1I95M587N80M379N2D1M3D57M1D277N39M2041N1I3M6D4M1D139M212N31M3394N165M1D2139N127M3136N6I148M7D1M1538N52M1232N116M2400N3M1D90M879N122M3D1586N107M1931N5D55M461N55M83N123M6D1488N81M1676N71M1664N74M1624N54M2108N123M1496N1M3D2M1D98M1D2412N72M6144N1M3D154M1960N85M2D4011N282M37760N392M	0.0828639	98.2946	NA	NA	NA	70.39
adab2aec-227c-488e-8478-52807cff5308.K562.5EU.0.unlabeled.III;16_chr1:51789000	chr1	+	51789196	51878715	89520	236M134N92M875N112M251N1I95M1055N54M1D277N39M2041N1I3M6D4M1D139M212N31M3394N164M1D1M2143N123M3136N6I148M7D1M1538N52M1232N116M2400N3M1D90M879N122M3D1586N107M1931N5D55M461N55M83N123M6D1488N81M1676N71M1664N74M1624N54M2108N123M1496N1M3D2M1D98M1D2412N72M6144N1M3D154M1960N85M2D4011N282M37760N445M	0.0191788	160.698	NA	0.0202733	110.437	NA
43e7b068-6e0d-46e3-bc7c-732a7d4c13cf.K562.5EU.60.labeled.IV;16_chr1:51789000	chr1	+	51789196	51806867	17672	236M134N92M875N112M251N1I95M579N88M379N2D1M3D57M1D277N39M2041N1I3M6D4M1D139M212N31M3394N164M1D1M2143N123M3136N6I148M7D1M1538N52M1232N74M	NA	NA	53.22	0.0231049	62.6087	NA
34679780-0455-4526-83a6-458bf52fdd20.K562.5EU.60.labeled.IV;16_chr1:51789000	chr1	+	51789196	51812089	22894	236M134N92M875N112M251N1I95M587N80M379N2D1M3D57M1D277N39M2041N1I3M6D4M1D139M212N3589M1D1M2143N123M3136N6I148M7D1M1538N52M1232N116M2400N3M1D90M879N122M3D1586N96M	0.0173426	812.892	NA	0.0608198	110.437	116.065
960eed5b-bd8a-4d68-a21e-44ab3c7bec53.K562.5EU.60.labeled.IV;16_chr1:51789000	chr1	+	51789196	51878473	89278	1449M251N1I95M587N80M379N2D1M3D57M1D277N39M2041N1I3M6D4M1D139M212N31M3394N164M1D1M2143N123M3136N6I148M7D1M1538N52M1232N116M2400N3M1D90M879N122M3D1586N107M1931N5D55M461N55M83N123M6D1488N81M1676N71M1664N74M1624N54M2108N123M1496N1M3D2M1D98M1D2412N72M6144N1M3D154M1960N85M2D4011N282M37760N203M	0.127706	86.2938	52.245	0.144551	54.7527	126.915
d632fa6e-b860-478b-abb6-2be22a27a0ad.K562.5EU.0.unlabeled.I;16_chr1:51789000	chr1	+	51789196	51878715	89520	236M134N92M875N112M251N1I95M587N80M379N2D1M3D57M1D277N39M2041N1I3M6D4M1D139M212N31M3394N164M1D1M2143N123M3136N6I148M7D1M1538N52M1232N116M2400N3M1D90M879N122M3D1586N107M1931N5D55M461N55M83N123M6D1488N81M1676N71M1664N74M1624N54M2108N123M1496N1M3D2M1D98M1D2412N72M6144N1M3D154M1960N85M2D4011N282M37760N445M	0.973116	53.1793	112.06	0.352672	74.4112	85.63
e740d2ea-f792-4d1a-83c8-fe43a59bb222.K562.5EU.60.labeled.IV;16_chr1:51789000	chr1	+	51789196	51810299	21104	236M134N92M875N112M251N1I95M587N80M379N2D1M3D57M1D277N39M2041N1I3M6D4M1D139M1I10M1I4M504N2M3I1M3I6M1D68M3040N165M1D1M2143N123M3136N6I148M7D1M1538N52M1232N116M2400N3M1D90M879N17M	0.0376972	186.972	NA	0.0608198	110.437	NA
3e810eed-4c74-4005-b930-026785605fc1.K562.5EU.60.labeled.IV;16_chr1:51789000	chr1	+	51789196	51878715	89520	232M126N3D4M1D96M875N112M251N1I95M587N80M379N2D1M3D57M1D277N39M2041N1I3M6D4M1D139M212N31M3394N164M1D1M2143N123M3136N6I148M7D1M1538N52M1232N116M2400N3M1D90M879N122M3D1586N107M1931N5D55M461N55M83N123M6D1488N81M1676N71M1664N74M1624N54M2108N123M1496N1M3D2M1D98M1D2412N72M6144N1M3D154M1960N85M2D4011N282M37760N445M	0.0425688	86.2938	NA	NA	NA	NA
0536ca4c-393e-4333-a0cc-1b4e15d56ccc.K562.5EU.60.labeled.VI;16_chr1:51789000	chr1	+	51789196	51878715	89520	236M134N92M875N112M251N1I95M587N80M379N2D1M3D57M1D277N39M2041N1I3M6D4M1D139M212N31M3394N164M1D1M2143N123M3136N6I148M7D1M1538N52M1232N116M2400N3M1D90M879N122M3D1586N107M1931N5D55M461N55M83N123M6D1488N81M1676N71M1664N74M1624N54M2108N123M1496N1M3D2M1D98M1D2412N72M6144N1M3D154M1960N85M2D154N59M1047N4M2D1M1I136M2605N285M37760N445M	0.303638	79.4913	127.19	0.30582	58.9839	175.2
289a7569-d10c-4951-adf8-b6c1e675194f.K562.5EU.60.labeled.IV;16_chr1:51789000	chr1	+	51789196	51815486	26291	236M134N1079M251N1I95M587N80M379N2D1M3D57M1D277N39M2041N1I3M6D4M1D139M212N5857M3136N6I148M7D1M1538N52M1232N116M2400N3M1D90M879N122M3D1586N103M1935N5D55M461N55M83N796M	0.0371906	214.086	141.68	0.0202733	110.437	NA
6ca178cb-e9bf-4826-a7b3-42416dc62740.K562.5EU.60.labeled.IV;16_chr1:51789000	chr1	+	51789209	51840353	51145	223M134N92M875N112M251N1I95M587N80M379N2D1M3D57M1D277N39M2041N1I3M6D4M1D139M212N31M3394N164M1D1M2143N123M3136N6I148M7D1M1538N52M1232N116M2400N3M1D90M879N122M3D1586N107M1931N5D55M461N55M83N123M6D1488N81M1676N71M5524N4D119M1496N1M3D2M1D98M1D2412N72M6144N1M3D154M1960N85M2D4011N125M	0.0608198	110.437	75.145	0.255375	36.1713	155.28
39fc20f7-21d1-4f8d-8d64-acb5484ebceb.K562.5EU.60.labeled.IV;16_chr1:51872000	chr1	+	51872780	51877228	4449	4449M	NA	NA	97.48	NA	NA	NA
32239074-a1c1-4da3-ae36-c5a703b8b70a.K562.5EU.60.labeled.II;16_chr1:52020000-1	chr1	+	52020134	52055213	35080	881M2478N84M937N2I65M2695N75M1229N53M12906N59M13402N216M	4.64381	33.6041	90.8025	5.43274	29.5567	121.575
7b16dd5a-2479-498b-9276-9b915dffc9d2.K562.5EU.60.labeled.heat.III;16_chr1:52020000	chr1	+	52020433	52029137	8705	4138M2697N5M1I1M1I1864M	0.0202733	110.437	NA	NA	NA	NA
cf600f0d-9c34-4469-a504-1a1796d79364.K562.5EU.60.labeled.heat.V;16_chr1:52032000	chr1	+	52032104	52056119	24016	1825M7608N59M13402N1122M	0.216441	132.928	58.68	0.215599	81.5283	160.37
6b9227cf-92ac-4486-86eb-a862c802675d.K562.5EU.60.labeled.heat.I;16_chr1:52036000	chr1	+	52036259	52037535	1277	1277M	0.0462098	62.6087	NA	NA	NA	NA
NM_001136497_001136497	chr1	+	52056280	52088412	32133	100M8445N114M18401N202M2570N60M540N1701M	0.0748564	200.421	125.293	0.0575364	160.698	52.685
NM_001243767_001243767	chr1	+	52056318	52088388	32071	62M3455N67M4923N114M21173N60M540N1677M	0.0608198	110.437	64.2	0.0359685	331.995	160.15
a039c8e6-46c3-4abc-a410-94d805fc279a.K562.5EU.60.labeled.heat.III;0_NM_001136497	chr1	+	52056318	52088388	32071	62M8445N114M21173N60M540N1677M	0.0178042	397.408	70.3475	0.0185953	214.086	144.71
NM_152265_001136497-3	chr1	+	52056318	52088412	32095	62M3455N67M4923N114M18401N202M2570N60M540N1701M	0.306114	163.938	114.76	0.217573	128.384	143.62
397b60b0-b402-4599-9e78-e2d8aff58853.K562.5EU.1440.labeled.I;0_chr1:52101000	chr1	+	52101230	52101573	344	344M	NA	NA	NA	NA	NA	NA
ab1497d5-0b3f-4c26-9434-6c0e4d4f034f.K562.5EU.60.labeled.heat.I;0_NM_004799	chr1	+	52142111	52346635	204525	293M56847N181M16937N106M16696N106M4211N2108M24177N100M2782N177M1631N170M5831N121M3907N123M3046N156M11636N225M2217N83M7843N105M28842N151M1769N81M3003N163M2191N106M4536N177M1115N576M	0.0693147	62.6087	82.81	0.0693147	62.6087	132
fc87ce99-bb57-4fd8-8a4c-59417329f3b2.K562.5EU.60.labeled.heat.V;16_chr1:52352000	chr1	+	52352213	52360233	8021	1013M1D4M1D2M292N124M960N86M135N1M6D102M458N53M1D3M2D155N54M99N5D77M1I4M342N110M81N59M558N128M3I1M2D3M400N167M82N135M414N131M224N71M268N131M92N109M7D5M1D93N70M170N177M188N2M2D160M	0.0851376	86.2938	162.773	0.0988514	50.8162	NA
a4de1a82-45fb-4bce-8334-d0d156d9c6ea.K562.5EU.60.labeled.I;16_chr1:52352000	chr1	+	52352540	52366192	13653	686M1D4M1D2M292N124M717N90M153N86M135N1M6D102M458N53M1D3M2D155N54M99N5D77M1I4M342N110M81N59M558N128M3I1M2D3M400N167M82N117M4D428N131M224N71M268N131M92N109M7D5M1D93N70M170N177M188N2M2D161M1I4M191N119M418N6D161M1D2M379N101M985N145M1805N79M1434N128M	0.0376972	186.972	85.095	0.109861	38.8778	91.4
1750550a-dcd7-499a-80be-094e392db6e1.K562.5EU.0.unlabeled.III;16_chr1:52352000	chr1	+	52352560	52364574	12015	666M1D4M1D2M292N124M960N86M135N1M6D102M458N53M1D3M2D155N54M99N5D77M1I4M342N110M81N59M558N128M3I1M2D3M400N167M82N117M4D428N131M224N71M268N131M92N109M7D5M1D93N70M170N177M188N2M2D161M1I4M191N119M418N6D161M1D2M379N101M985N145M1805N23M	0.0924196	30.6383	NA	NA	NA	NA
92f4ae4b-6f4d-4d81-97ca-b8993f59514d.K562.5EU.60.labeled.IV;0_chr1:52366000	chr1	+	52366204	52370235	4032	4032M	0.0202733	110.437	NA	0.0231049	62.6087	235.21
2d14201b-f964-48cd-99f8-6612ad7e82ee.K562.5EU.0.unlabeled.I;16_chr1:52372000	chr1	+	52372837	52383492	10656	2061M532N160M6040N6M1D1M1D126M1658N70M	NA	NA	87.9325	0.130577	78.3609	21
6ba8bb48-1681-453d-b423-411b7e4c4b62.K562.5EU.60.labeled.IV;16_chr1:52372000	chr1	+	52372837	52404458	31622	537M1431N2M3D88M532N160M6040N6M1D1M1D126M1658N154M980N162M439N107M2D2M2D1M585N93M2D2490N197M1D3M1D1M577N99M4121N362M750N60M1430N314M1316N5M4D172M3501N5M3I132M1D3M638N95M1D2016N212M	0.145519	96.572	44.17	0.200662	35.392	90.895
a113bfc1-f555-458f-9bb5-76567879f283.K562.5EU.60.labeled.IV;16_chr1:52370000-3	chr1	+	52372837	52404458	31622	537M1431N2M3D88M532N160M6040N6M1D1M1D126M1658N147M260N100M610N8M2D169M439N107M2D2M2D1M585N93M2D2490N197M1D3M1D1M577N99M4121N362M2242N312M1316N5M4D181M3498N131M1D3M638N95M1D2016N212M	0.69196	50.8162	37.04	1.14898	30.1799	114.82
0422eccb-ae4d-4c77-8016-eca5a760ea89.K562.5EU.60.labeled.IV;0_NM_032864	chr1	+	52404574	52420789	16216	306M800N160M2729N122M2424N86M1313N111M1254N981M478N5452M	0.283826	110.437	99.955	0.0976267	140.246	82.52
NM_032864_032864-1	chr1	+	52404574	52420833	16260	306M800N160M2729N122M2424N86M1313N111M1254N113M629N27M114N98M478N49M1261N4186M	0.379424	120.784	96.715	0.283826	110.437	196.955
b1b3d16b-4ed4-47f5-b97e-5e9a5016d323.K562.5EU.60.labeled.heat.I;0_NM_032864	chr1	+	52404574	52417020	12447	306M800N6945M1254N1508M1261N373M	0.229073	46.8654	103.248	0.115525	62.6087	NA
6d33bb3a-0f5d-43a7-aa77-867bfc9f8968.K562.5EU.60.labeled.heat.V;0_NM_032864	chr1	+	52404615	52417020	12406	265M800N34M6800N111M1254N113M629N27M114N98M478N49M1261N373M	0.0763576	46.8654	27.75	0.0549306	38.8778	NA
f5c643fd-7fbc-4730-8446-3bcf9317d15e.K562.5EU.60.labeled.heat.IV;0_chr1:52416000	chr1	+	52417854	52420836	2983	2983M	NA	NA	NA	NA	NA	12.17
[truncated: 39,183 more rows]

## Sheet: nanoID.gene.level.estimates
	chr	strand	start	end	type	source	length	id	synthesis rate [a.u.]	half-lives [min]	median poly(A)-tail length [nt]	synthesis rate HS [a.u.]	half-lives HS [min]	median poly(A)-tail length HS [nt]	gene_id	transcript_id
[truncated: 8,282 more rows]

## Sheet: nanoID.isoform.level.features
	median poly(A)-tail length [nt]	minimum.free.energy.mean	minimum.free.energy.min	minimum.free.energy 0%	minimum.free.energy 1%	minimum.free.energy 2%	minimum.free.energy 3%	minimum.free.energy 4%	minimum.free.energy 5%	minimum.free.energy 6%	minimum.free.energy 7%	minimum.free.energy 8%	minimum.free.energy 9%	minimum.free.energy 10%	rouskin.weissman.2014.RNA.secondary.structures.vivo.300DMS	rouskin.weissman.2014.RNA.secondary.structures.vivo.400DMS	rouskin.weissman.2014.RNA.secondary.structures.vitro	rouskin.weissman.2014.RNA.secondary.structures.denatured	ribosome profiling	GNL3_K562_rep02	DDX24_K562_rep01	XRCC6_K562_rep02	SF3B4_K562_rep01	UTP18_K562_rep02	HNRNPU_K562_rep01	NCBP2_K562_rep02	HNRNPM_K562_rep01	LARP7_K562_rep01	RBM22_K562_rep02	PCBP1_K562_rep01	TBRG4_K562_rep01	PPIL4_K562_rep01	DDX3X_K562_rep01	TBRG4_K562_rep02	METAP2_K562_rep02	DDX51_K562_rep02	CSTF2T_K562_rep01	TROVE2_K562_rep02	KHDRBS1_K562_rep02	SLTM_K562_rep01	PUM1_K562_rep02	HNRNPC_K562_rep01	RPS11_K562_rep02	RBM22_K562_rep01	RBFOX2_K562_rep01	HNRNPK_K562_rep01	GEMIN5_K562_rep02	SRSF7_K562_rep01	PUM2_K562_rep01
[truncated: 36,138 more rows]
[truncated: 206 more columns]

[truncated: 1 more sheets: nanoID.gene.level.features]
